# Supplementary material for: Linker histone H1.2 and H1.4 affect the neutrophil lineage determination
Source: eLife. 2020 May 11;9:e52563. doi: 10.7554/eLife.52563 (PMC7250579; doi:10.7554/eLife.52563)
Supplement: Figure 4—source data 1. — The individual sheets display expression values of indicated conditions (Cont. is wild type and scr. combined, for the respective H1 subtypes values of 2 clones are combined). [file elife-52563-fig4-data1.xlsx]

## Sheet: Cont.3Vs0
Geneid	gene_name	biotype	interpro_description	wikigene_description	mim_gene_description	logFC	logCPM	F	PValue
ENSG00000268895	A1BG-AS1	antisense				0.94139	0.475101	4.91794	0.028604
ENSG00000094914	AAAS	protein_coding	WD40 repeat	aladin WD repeat nucleoporin	AAAS GENE; AAAS;;ALADIN;;ADRACALIN	-0.583064	5.71715	105.036	5.29949e-18
ENSG00000081760	AACS	protein_coding	AMP-dependent synthetase/ligase	acetoacetyl-CoA synthetase	ACETOACETYL-CoA SYNTHETASE; AACS;;ACYL-CoA SYNTHETASE FAMILY, MEMBER 1; ACSF1	0.74642	5.51198	212.53	3.94377e-28
ENSG00000158122	AAED1	protein_coding	Peroxiredoxin-like FAM213/AAED1	AhpC/TSA antioxidant enzyme domain containing 1		-0.44796	3.52397	32.2515	9.94751e-08
ENSG00000103591	AAGAB	protein_coding	Alpha/gamma-adaptin-binding protein p34	alpha- and gamma-adaptin binding protein	ALPHA- AND GAMMA-ADAPTIN-BINDING PROTEIN; AAGAB;;p34	-0.197568	6.21674	17.4811	5.61013e-05
ENSG00000115977	AAK1	protein_coding	BMP-2-inducible protein kinase, C-terminal	AP2 associated kinase 1	ADAPTOR PROTEIN 2-ASSOCIATED KINASE 1; AAK1;;AP2-ASSOCIATED KINASE 1;;KIAA1048	0.253599	5.53962	9.42588	0.0026571
ENSG00000087884	AAMDC	protein_coding	NDUFAF3/Mth938 domain-containing protein	adipogenesis associated Mth938 domain containing		0.724865	1.89728	42.6903	1.71579e-09
ENSG00000127837	AAMP	protein_coding	WD40 repeat	angio associated migratory cell protein	ANGIO-ASSOCIATED MIGRATORY CELL PROTEIN; AAMP	-0.55049	6.65875	97.0318	4.65991e-17
ENSG00000131043	AAR2	protein_coding	A1 cistron-splicing factor, AAR2	AAR2 splicing factor homolog		-0.54096	5.58103	117.568	2.05735e-19
ENSG00000090861	AARS	protein_coding	Alanine-tRNA ligase, class IIc	alanyl-tRNA synthetase	ALANYL-tRNA SYNTHETASE; AARS;;ALARS	-0.19826	8.7104	11.0463	0.00118499
ENSG00000124608	AARS2	protein_coding	Alanine-tRNA ligase, class IIc	alanyl-tRNA synthetase 2, mitochondrial	ALANYL-tRNA SYNTHETASE 2; AARS2;;ALANYL-tRNA SYNTHETASE, MITOCHONDRIAL;;MT-ALARS;;KIAA1270	-0.444573	5.3068	38.0552	1.00315e-08
ENSG00000157426	AASDH	protein_coding	AMP-dependent synthetase/ligase	aminoadipate-semialdehyde dehydrogenase	AMINOADIPATE-SEMIALDEHYDE DEHYDROGENASE; AASDH;;ACYL-CoA SYNTHETASE FAMILY, MEMBER 4; ACSF4	-0.0455284	4.82145	0.450133	0.503587
ENSG00000149313	AASDHPPT	protein_coding	Phosphopantetheine-protein transferase domain	aminoadipate-semialdehyde dehydrogenase-phosphopantetheinyl transferase	ALPHA-AMINOADIPATE SEMIALDEHYDE DEHYDROGENASE-PHOSPHOPANTETHEINYLTRANSFERASE; AASDHPPT;;AASDPPT;;LYS5, S. CEREVISIAE, HOMOLOG OF;;CGI-80;;DKFZP566E2346	-0.948859	5.53161	191.248	2.02467e-26
ENSG00000215458	AATBC	antisense				3.97506	-1.38928	27.0455	1.01898e-06
ENSG00000275700	AATF	protein_coding	Apoptosis-antagonizing transcription factor, C-terminal	apoptosis antagonizing transcription factor	APOPTOSIS-ANTAGONIZING TRANSCRIPTION FACTOR; AATF;;CHE1	-0.524545	6.71482	191.983	1.75929e-26
ENSG00000181409	AATK	protein_coding	Protein kinase domain	apoptosis associated tyrosine kinase		4.44688	-0.131758	27.8354	6.8032e-07
ENSG00000225200	AB019441.29	processed_pseudogene				-0.261747	7.90494	18.1486	4.13744e-05
ENSG00000183044	ABAT	protein_coding	4-aminobutyrate aminotransferase, eukaryotic	4-aminobutyrate aminotransferase	4-@AMINOBUTYRATE AMINOTRANSFERASE; ABAT;;GAMMA-AMINOBUTYRATE TRANSAMINASE; GABAT;;GABA-TRANSFERASE;;GABA-TRANSAMINASE	2.13507	3.80876	202.449	2.46529e-27
ENSG00000283544	ABBA01000934.1	unprocessed_pseudogene				-0.192258	1.14239	1.51212	0.221269
ENSG00000283566	ABC13-47656900H15.1	protein_coding	Protein kinase domain			-0.0936852	0.835882	0.386522	0.535336
ENSG00000165029	ABCA1	protein_coding	ABC transporter-like	ATP binding cassette subfamily A member 1	ATP-BINDING CASSETTE, SUBFAMILY A, MEMBER 1; ABCA1;;ATP-BINDING CASSETTE 1; ABC1;;ATP-BINDING CASSETTE TRANSPORTER 1;;ABC TRANSPORTER 1;;CHOLESTEROL EFFLUX REGULATORY PROTEIN; CERPCORONARY HEART DISEASE IN FAMILIAL HYPERCHOLESTEROLEMIA, PROTECTIONAG /.../ INCLUDED;;HIGH DENSITY LIPOPROTEIN CHOLESTEROL LEVEL QUANTITATIVE TRAIT LOCUS13, INCLUDED; HDLCQ13, INCLUDED	-3.9343	2.12415	411.206	3.3159e-40
ENSG00000251595	ABCA11P	transcribed_processed_pseudogene				-0.603125	0.391267	10.3123	0.00170431
ENSG00000238098	ABCA17P	unitary_pseudogene				-0.812915	2.6566	13.9956	0.000284734
ENSG00000107331	ABCA2	protein_coding	ABC transporter-like	ATP binding cassette subfamily A member 2	ATP-BINDING CASSETTE, SUBFAMILY A, MEMBER 2; ABCA2;;ATP-BINDING CASSETTE 2; ABC2;;ATP-BINDING CASSETTE TRANSPORTER 2;;ABC TRANSPORTER 2;;KIAA1062	-0.495741	6.23922	27.4046	7.30504e-07
ENSG00000167972	ABCA3	protein_coding	ABC transporter-like	ATP binding cassette subfamily A member 3	ATP-BINDING CASSETTE, SUBFAMILY A, MEMBER 3; ABCA3;;ATP-BINDING CASSETTE 3; ABC3;;ATP-BINDING CASSETTE TRANSPORTER 3;;ABC TRANSPORTER 3;;CED7, C. ELEGANS, HOMOLOG OF	1.56198	4.31314	166.683	2.72214e-24
ENSG00000154265	ABCA5	protein_coding	ABC transporter-like	ATP binding cassette subfamily A member 5	ATP-BINDING CASSETTE, SUBFAMILY A, MEMBER 5; ABCA5;;KIAA1888	0.812859	0.929977	9.14758	0.00307414
ENSG00000064687	ABCA7	protein_coding	ABC transporter A, ABCA	ATP binding cassette subfamily A member 7		3.06241	6.53421	563.708	2.54048e-46
ENSG00000135776	ABCB10	protein_coding	ABC transporter-like	ATP binding cassette subfamily B member 10	ATP-BINDING CASSETTE, SUBFAMILY B, MEMBER 10; ABCB10;;MITOCHONDRIAL ABC PROTEIN 2; MABC2; MTABC2	-0.734912	6.68982	155.538	2.90195e-23
ENSG00000131269	ABCB7	protein_coding	ABC transporter-like	ATP binding cassette subfamily B member 7	ATP-BINDING CASSETTE, SUBFAMILY B, MEMBER 7; ABCB7;;ATP-BINDING CASSETTE 7; ABC7;;ATP-BINDING CASSETTE TRANSPORTER 7;;ABC TRANSPORTER 7	-0.479412	5.68575	101.011	1.56515e-17
ENSG00000197150	ABCB8	protein_coding		ATP binding cassette subfamily B member 8	ATP-BINDING CASSETTE, SUBFAMILY B, MEMBER 8; ABCB8;;MITOCHONDRIAL ATP-BINDING CASSETTE 1; MABC1	-0.175026	4.5188	4.6739	0.0326491
ENSG00000150967	ABCB9	protein_coding	ABC transporter-like	ATP binding cassette subfamily B member 9	ATP-BINDING CASSETTE, SUBFAMILY B, MEMBER 9; ABCB9	0.483123	1.90789	11.9707	0.000753589
ENSG00000103222	ABCC1	protein_coding	ABC transporter-like	ATP binding cassette subfamily C member 1	ATP-BINDING CASSETTE, SUBFAMILY C, MEMBER 1; ABCC1;;MULTIDRUG RESISTANCE-ASSOCIATED PROTEIN 1; MRP1;;MULTIDRUG RESISTANCE-ASSOCIATED PROTEIN; MRP	-0.341839	6.94865	37.1936	1.40171e-08
ENSG00000124574	ABCC10	protein_coding	ABC transporter-like	ATP binding cassette subfamily C member 10	ATP-BINDING CASSETTE, SUBFAMILY C, MEMBER 10; ABCC10;;MULTIDRUG RESISTANCE-ASSOCIATED PROTEIN 7; MRP7	0.760731	5.11631	92.1158	1.84602e-16
ENSG00000023839	ABCC2	protein_coding	ABC transporter-like	ATP binding cassette subfamily C member 2	ATP-BINDING CASSETTE, SUBFAMILY C, MEMBER 2; ABCC2;;MULTISPECIFIC ORGANIC ANION TRANSPORTER, CANALICULAR; CMOAT;;MULTIDRUG RESISTANCE-ASSOCIATED PROTEIN 2; MRP2	0.796552	0.14655	8.65314	0.00393291
ENSG00000125257	ABCC4	protein_coding	ABC transporter-like	ATP binding cassette subfamily C member 4	ATP-BINDING CASSETTE, SUBFAMILY C, MEMBER 4; ABCC4;;MULTIDRUG RESISTANCE-ASSOCIATED PROTEIN 4; MRP4;;MULTISPECIFIC ORGANIC ANION TRANSPORTER B; MOATB	-1.10189	6.09141	270.148	2.94984e-32
ENSG00000114770	ABCC5	protein_coding	ABC transporter-like	ATP binding cassette subfamily C member 5	ATP-BINDING CASSETTE, SUBFAMILY C, MEMBER 5; ABCC5;;MULTIDRUG RESISTANCE-ASSOCIATED PROTEIN 5; MRP5;;MOATC	-0.051915	5.32881	0.80622	0.371074
ENSG00000101986	ABCD1	protein_coding	ABC transporter-like	ATP binding cassette subfamily D member 1	ATP-BINDING CASSETTE, SUBFAMILY D, MEMBER 1; ABCD1;;ADRENOLEUKODYSTROPHY PROTEIN; ALDP	0.105729	5.7984	1.44962	0.231005
ENSG00000117528	ABCD3	protein_coding	ABC transporter-like	ATP binding cassette subfamily D member 3	ATP-BINDING CASSETTE, SUBFAMILY D, MEMBER 3; ABCD3;;PEROXISOMAL MEMBRANE PROTEIN 1; PXMP1;;PEROXISOMAL MEMBRANE PROTEIN, 70-KD; PMP70	-0.113536	5.74668	3.36652	0.0690602
ENSG00000119688	ABCD4	protein_coding	ABC transporter-like	ATP binding cassette subfamily D member 4	ATP-BINDING CASSETTE, SUBFAMILY D, MEMBER 4; ABCD4;;PEROXISOMAL MEMBRANE PROTEIN 1-LIKE; PXMP1L;;P70R;;PMP69	-0.256929	4.0528	12.3395	0.000630043
ENSG00000164163	ABCE1	protein_coding	ABC transporter-like	ATP binding cassette subfamily E member 1	RIBONUCLEASE 4 INHIBITOR; RNS4I;;RNase L INHIBITOR;;ATP-BINDING CASSETTE, SUBFAMILY E, MEMBER 1; ABCE1	-1.34739	7.6732	238.821	4.26621e-30
ENSG00000204574	ABCF1	protein_coding	ABC transporter-like	ATP binding cassette subfamily F member 1	ATP-BINDING CASSETTE, SUBFAMILY F, MEMBER 1; ABCF1;;ATP-BINDING CASSETTE 50; ABC50	-0.503687	7.05996	99.9752	2.07523e-17
ENSG00000033050	ABCF2	protein_coding	ABC transporter-like	ATP binding cassette subfamily F member 2	ATP-BINDING CASSETTE, SUBFAMILY F, MEMBER 2; ABCF2;;HUMAN SEQUENCE SIMILAR TO YEAST 18; HUSSY18	-1.41864	6.86477	725.51	3.82085e-52
ENSG00000161204	ABCF3	protein_coding	ABC transporter-like	ATP binding cassette subfamily F member 3		-0.121442	5.64487	5.24393	0.0238054
ENSG00000144827	ABHD10	protein_coding		abhydrolase domain containing 10		-0.339056	5.11403	41.3299	2.86432e-09
ENSG00000106077	ABHD11	protein_coding	Alpha/beta hydrolase fold-1	abhydrolase domain containing 11		0.416492	3.05092	15.3863	0.000147846
ENSG00000225969	ABHD11-AS1	antisense				1.21961	-1.08887	4.75337	0.0312319
ENSG00000100997	ABHD12	protein_coding		abhydrolase domain containing 12	ABHYDROLASE DOMAIN-CONTAINING PROTEIN 12; ABHD12	0.0987017	5.56218	3.44071	0.0661119
ENSG00000139826	ABHD13	protein_coding	Serine aminopeptidase, S33	abhydrolase domain containing 13		0.380489	5.65945	26.4538	1.08992e-06
ENSG00000248487	ABHD14A	protein_coding	Alpha/beta hydrolase fold-1	abhydrolase domain containing 14A		-0.778317	2.14957	39.5991	5.536e-09
ENSG00000114779	ABHD14B	protein_coding	Alpha/beta hydrolase fold-1	abhydrolase domain containing 14B		-0.0434543	4.95186	0.420214	0.518093
ENSG00000168792	ABHD15	protein_coding	Serine aminopeptidase, S33	abhydrolase domain containing 15		0.763053	5.12677	192.233	1.67724e-26
ENSG00000204427	ABHD16A	protein_coding	Alpha/beta hydrolase fold-1	abhydrolase domain containing 16A	ABHYDROLASE DOMAIN-CONTAINING 16A; ABHD16A;;HLA-B-ASSOCIATED TRANSCRIPT 5; BAT5;;D6S82E	1.61896	-0.287685	23.8551	3.30614e-06
ENSG00000129968	ABHD17A	protein_coding	Serine aminopeptidase, S33	abhydrolase domain containing 17A		0.379037	6.22997	15.2068	0.000160802
ENSG00000198658	ABHD17AP1	unprocessed_pseudogene				0.241551	3.79541	3.33468	0.0703691
ENSG00000250536	ABHD17AP3	unprocessed_pseudogene				0.120391	-0.372322	0.161971	0.688079
ENSG00000229107	ABHD17AP4	processed_pseudogene				0.336509	-0.486493	1.4214	0.235572
ENSG00000263366	ABHD17AP5	processed_pseudogene				0.202114	1.62146	1.34781	0.248012
ENSG00000226981	ABHD17AP6	unprocessed_pseudogene				1.34038	-0.490439	17.5	5.56164e-05
ENSG00000107362	ABHD17B	protein_coding	Serine aminopeptidase, S33	abhydrolase domain containing 17B		-0.410665	4.92571	51.4483	7.0527e-11
ENSG00000136379	ABHD17C	protein_coding	Alpha/Beta hydrolase fold	abhydrolase domain containing 17C		-0.793796	3.94887	140.699	7.92251e-22
ENSG00000164074	ABHD18	protein_coding	Abhydrolase domain containing 18	abhydrolase domain containing 18		0.536229	4.60597	52.0016	5.79917e-11
ENSG00000140526	ABHD2	protein_coding		abhydrolase domain containing 2	ABHYDROLASE DOMAIN-CONTAINING 2; ABHD2;;LUNG ALPHA/BETA HYDROLASE 2; LABH2	0.560005	7.30532	176.534	3.62944e-25
ENSG00000158201	ABHD3	protein_coding	Alpha/beta hydrolase fold-1	abhydrolase domain containing 3	ABHYDROLASE DOMAIN-CONTAINING 3; ABHD3;;LUNG ALPHA/BETA HYDROLASE 3; LABH3	0.523235	5.64669	55.5025	1.70725e-11
ENSG00000100439	ABHD4	protein_coding	Alpha/beta hydrolase fold-1	abhydrolase domain containing 4		1.46288	2.32865	49.7766	1.27919e-10
ENSG00000011198	ABHD5	protein_coding	Alpha/beta hydrolase fold-1	abhydrolase domain containing 5	ABHYDROLASE DOMAIN-CONTAINING 5; ABHD5;;COMPARATIVE GENE IDENTIFICATION 58; CGI58;;NCIE2 GENE; NCIE2	0.216083	3.78762	7.6599	0.00656032
ENSG00000163686	ABHD6	protein_coding	Alpha/beta hydrolase fold-1	abhydrolase domain containing 6		0.0366337	2.87144	0.167809	0.682811
ENSG00000136754	ABI1	protein_coding	Target SNARE coiled-coil homology domain	abl interactor 1	ABL INTERACTOR 1; ABI1;;SPECTRIN SH3 DOMAIN-BINDING PROTEIN 1; SSH3BP1;;E3B1ABI1/MLL FUSION GENE, INCLUDED	0.240448	6.64699	25.3177	1.7652e-06
ENSG00000138443	ABI2	protein_coding	Target SNARE coiled-coil homology domain	abl interactor 2		-0.393352	5.60598	52.4725	4.91215e-11
ENSG00000108798	ABI3	protein_coding	SH3 domain	ABI family member 3	ABI FAMILY MEMBER 3; ABI3;;NESH PROTEIN; NESH	-0.627268	1.64315	15.6324	0.000131788
ENSG00000097007	ABL1	protein_coding	Protein kinase domain	ABL proto-oncogene 1, non-receptor tyrosine kinase	ABELSON MURINE LEUKEMIA VIRAL ONCOGENE HOMOLOG 1; ABL1;;TRANSFORMATION GENE: ONCOGENE ABL;;ABELSON STRAIN OF MURINE LEUKEMIA VIRUS; ABLABL1/BCR FUSION GENE, INCLUDED;;ABL1/NUP214 FUSION GENE, INCLUDED	-0.133004	7.0272	3.97632	0.048457
ENSG00000143322	ABL2	protein_coding	Protein kinase domain	ABL proto-oncogene 2, non-receptor tyrosine kinase	V-ABL ABELSON MURINE LEUKEMIA VIRAL ONCOGENE HOMOLOG 2; ABL2;;ONCOGENE ABL2;;ONCOGENE ABLL;;ABELSON-RELATED GENE; ARG;;ONCOGENE ARGABL2/ETV6 FUSION GENE, INCLUDED	-0.672061	5.47771	163.386	5.42893e-24
ENSG00000099204	ABLIM1	protein_coding	Villin headpiece	actin binding LIM protein 1	ACTIN-BINDING LIM PROTEIN FAMILY, MEMBER 1; ABLIM1;;ABLIM;;LIM ACTIN-BINDING PROTEIN 1; LIMAB1;;LIMATIN	-0.904225	5.69402	207.676	9.4639e-28
ENSG00000159842	ABR	protein_coding	C2 domain	active BCR-related	ACTIVE BCR-RELATED GENE; ABR	0.108194	7.0235	3.12298	0.0797882
ENSG00000146386	ABRACL	protein_coding	Costars domain	ABRA C-terminal like		-0.00954466	6.311	0.0199316	0.88797
ENSG00000146109	ABT1	protein_coding	Nucleotide-binding alpha-beta plait domain	activator of basal transcription 1		-0.501863	5.96662	80.7869	5.01763e-15
ENSG00000114626	ABTB1	protein_coding		ankyrin repeat and BTB domain containing 1	ANKYRIN REPEAT AND BTB/POZ DOMAIN CONTAINING 1; ABTB1;;BPOZ	3.46022	6.3681	401.869	2.44753e-39
ENSG00000166016	ABTB2	protein_coding	BTB/POZ domain	ankyrin repeat and BTB domain containing 2		-0.366173	3.89902	10.0928	0.00190137
ENSG00000270393	AC000095.9	processed_pseudogene				2.78433	-1.59562	8.85856	0.00357722
ENSG00000280347	AC000123.2	TEC				0.228186	1.28675	2.32973	0.129608
ENSG00000278727	AC000403.4	lincRNA				1.8532	-0.191206	17.1896	6.41184e-05
ENSG00000235560	AC002310.12	antisense				-0.137274	-0.258235	0.357495	0.55105
ENSG00000241764	AC002467.7	antisense				0.42847	0.812952	5.59325	0.0196662
ENSG00000196656	AC004057.1	transcribed_processed_pseudogene				-1.16983	-0.73101	14.5635	0.000217607
ENSG00000251259	AC004069.2	lincRNA				1.71428	-0.41021	17.9285	4.57332e-05
ENSG00000005189	AC004381.6	protein_coding		exonuclease NEF-sp		-0.29392	3.78836	11.2444	0.00107493
ENSG00000146677	AC004453.8	processed_pseudogene				-0.572287	1.39494	20.6368	1.35274e-05
ENSG00000242687	AC004893.11	antisense				0.683903	1.61423	21.6087	8.80209e-06
ENSG00000243554	AC004967.7	unprocessed_pseudogene				-0.256176	1.29422	2.67956	0.104316
ENSG00000205485	AC004980.7	transcribed_unprocessed_pseudogene				-0.732438	2.334	63.4705	1.15994e-12
ENSG00000233225	AC004987.9	processed_pseudogene				0.320176	0.362367	2.07144	0.152735
ENSG00000224280	AC005014.5	processed_pseudogene				-0.167743	0.993756	1.10468	0.295394
ENSG00000233834	AC005083.1	processed_transcript				-0.173886	0.401106	1.27138	0.261801
ENSG00000196295	AC005154.6	processed_transcript				1.77204	1.47869	85.7143	1.16577e-15
ENSG00000244480	AC005154.7	transcribed_processed_pseudogene				2.24221	-1.17855	12.4387	0.000600501
ENSG00000267283	AC005306.3	processed_transcript				1.94116	-0.222696	32.6271	8.54965e-08
ENSG00000214719	AC005562.1	processed_transcript				0.381461	-0.154847	2.65121	0.106146
ENSG00000228649	AC005682.5	processed_transcript				-1.62249	1.04616	131.052	7.55213e-21
ENSG00000268034	AC005795.1	processed_pseudogene				-0.265321	0.375217	2.41407	0.122935
ENSG00000231916	AC006033.22	processed_pseudogene				-0.448833	2.24383	9.66828	0.00235187
ENSG00000261342	AC006538.1	sense_intronic				-0.23825	1.12439	1.94376	0.165888
ENSG00000273203	AC006946.16	lincRNA				1.61918	-1.22924	3.77812	0.0553716
ENSG00000235859	AC006978.6	processed_pseudogene				-0.0158746	2.87579	0.0373908	0.847005
ENSG00000229127	AC007038.7	antisense				1.38741	-0.367113	17.3919	5.84385e-05
ENSG00000172974	AC007318.5	processed_pseudogene				-0.822813	0.915279	30.5235	2.00784e-07
ENSG00000227946	AC007383.3	lincRNA				1.19652	0.952734	29.0245	3.72048e-07
ENSG00000239467	AC007405.6	lincRNA				1.34048	0.215445	18.4844	3.55249e-05
ENSG00000233762	AC007969.5	processed_pseudogene				-0.426732	1.85129	9.437	0.00264225
ENSG00000213237	AC008155.1	processed_pseudogene				0.376318	1.26469	1.47649	0.226813
ENSG00000239763	AC009120.3	processed_pseudogene				2.31085	-0.538181	23.9204	3.21427e-06
ENSG00000259972	AC009120.6	processed_transcript				1.56479	1.57757	78.8107	9.10502e-15
ENSG00000238045	AC009133.12	antisense				-0.981286	0.578682	24.5062	2.49799e-06
ENSG00000259952	AC009133.15	antisense				-0.836646	0.0531992	9.03615	0.0032362
ENSG00000216895	AC009403.2	antisense				0.0249474	-0.0660311	0.0112234	0.91581
ENSG00000226121	AC009487.6	processed_pseudogene				-0.272202	0.0567904	2.17784	0.142682
ENSG00000224152	AC009506.1	antisense				1.42294	2.59752	192.727	1.52652e-26
ENSG00000223960	AC009948.5	antisense				-0.353517	1.32014	7.2781	0.00800629
ENSG00000225963	AC009950.2	antisense				0.368659	-0.466017	2.19106	0.141486
ENSG00000229738	AC010240.3	processed_pseudogene				-0.213574	1.38667	2.02833	0.157037
ENSG00000214784	AC010468.1	processed_pseudogene				0.674374	-0.369405	3.34201	0.0700656
ENSG00000276256	AC011043.1	protein_coding		uncharacterized LOC102724951		0.656804	0.595001	19.4282	2.32078e-05
ENSG00000283602	AC011380.8	transcribed_unitary_pseudogene				0.751908	-1.60529	5.55209e-08	0.999813
ENSG00000227241	AC011998.4	processed_pseudogene				0.00838781	4.41691	0.0139708	0.906112
ENSG00000213197	AC012066.1	processed_pseudogene				-1.17279	0.804444	84.9112	1.47518e-15
ENSG00000235072	AC012074.2	lincRNA				0.872922	-0.646874	5.65279	0.0190396
ENSG00000231848	AC012354.8	processed_pseudogene				-0.374335	4.78045	31.0035	1.65042e-07
ENSG00000091436	AC013461.1	protein_coding	Protein kinase domain	sterile alpha motif and leucine zipper containing kinase AZK	LEUCINE ZIPPER- AND STERILE ALPHA MOTIF-CONTAINING KINASE; ZAK;;MLK-LIKE MITOGEN-ACTIVATED PROTEIN TRIPLE KINASE; MLTK;;MLK-RELATED KINASE; MRK	-0.430012	6.23608	44.8955	7.55035e-10
ENSG00000223427	AC016716.1	processed_pseudogene				0.246454	1.87937	4.6352	0.0333639
ENSG00000232090	AC016724.6	processed_pseudogene				-0.543021	-0.0692695	8.64141	0.00395655
ENSG00000228305	AC016734.2	processed_pseudogene				-1.04545	1.30019	43.242	1.39564e-09
ENSG00000218175	AC016739.2	processed_pseudogene				-0.21194	1.25623	2.24762	0.136499
ENSG00000212978	AC016747.3	processed_transcript				0.143954	1.79042	1.93459	0.166882
ENSG00000213110	AC019178.2	processed_pseudogene				0.236667	1.2612	2.16664	0.143704
ENSG00000213399	AC022210.2	processed_pseudogene				-0.824776	0.975114	15.0222	0.000175352
ENSG00000214135	AC024560.3	transcribed_unprocessed_pseudogene				-0.034891	2.35694	0.118414	0.731375
ENSG00000215068	AC025171.1	antisense				1.31549	1.72677	82.2309	3.2589e-15
ENSG00000179859	AC025335.1	protein_coding	Zinc finger, RING-type			0.156761	0.773477	1.08461	0.299803
ENSG00000174977	AC026271.5	processed_pseudogene				-0.301467	0.993368	3.79512	0.0537838
ENSG00000234028	AC062029.1	antisense				1.20898	-0.974708	14.3285	0.000243162
ENSG00000235651	AC064850.4	processed_pseudogene				-0.561427	4.01039	57.8442	7.64422e-12
ENSG00000229512	AC068580.5	sense_intronic				1.95192	-0.721619	11.6198	0.000894262
ENSG00000189229	AC069277.2	lincRNA				0.252236	0.368401	2.02859	0.157079
ENSG00000235499	AC073046.25	lincRNA				-0.0150006	1.78316	0.0128688	0.909874
ENSG00000235574	AC073150.6	processed_pseudogene				-1.79806	1.29108	120.071	1.0982e-19
ENSG00000226999	AC073325.2	processed_pseudogene				0.249617	7.14341	13.8284	0.000308279
ENSG00000227470	AC073415.2	processed_pseudogene				-0.700198	-0.835173	7.38949	0.00755313
ENSG00000234072	AC074117.10	antisense				-0.20107	-0.416597	0.719912	0.397896
ENSG00000283236	AC074141.3	transcribed_unprocessed_pseudogene				1.56069	-0.48569	27.5481	6.87879e-07
ENSG00000213963	AC074286.1	sense_overlapping				0.880026	-0.0240149	13.6737	0.00033186
ENSG00000225889	AC074289.1	antisense				0.16178	-1.04543	0.0683915	0.794151
ENSG00000231027	AC079325.6	unprocessed_pseudogene				1.11144	-2.11769	4.66929e-08	0.999828
ENSG00000237753	AC079922.3	lincRNA				2.62722	0.443686	116.565	2.65049e-19
ENSG00000259820	AC083843.1	lincRNA				0.347121	0.204908	2.87271	0.0927384
ENSG00000204745	AC083899.3	unprocessed_pseudogene				-1.34547	1.26982	104.938	5.43967e-18
ENSG00000279483	AC090498.1	protein_coding	Ribosomal protein L41			-0.179089	-0.27468	0.591159	0.443512
ENSG00000229368	AC090587.4	sense_overlapping				0.636727	0.510191	8.91855	0.00343541
ENSG00000215196	AC091878.1	antisense				1.86386	-0.878029	16.2233	0.000103004
ENSG00000229503	AC092155.1	processed_pseudogene				-0.377641	-0.733776	2.96511	0.0877065
ENSG00000170846	AC093323.3	lincRNA				-0.185039	5.02842	11.4458	0.000973776
ENSG00000234231	AC093616.4	unprocessed_pseudogene				-0.224595	0.24378	1.65866	0.200311
ENSG00000240859	AC093627.10	lincRNA				-0.661583	0.634358	12.5861	0.000559192
ENSG00000220804	AC093642.5	transcribed_unprocessed_pseudogene				0.434644	0.153485	4.34549	0.0392705
ENSG00000232533	AC093673.5	antisense				2.03851	0.770756	59.9597	3.73474e-12
ENSG00000213222	AC093724.2	processed_pseudogene				-1.42536	3.71675	199.745	4.07004e-27
ENSG00000225205	AC093818.1	antisense				0.455094	0.58553	3.82756	0.0527856
ENSG00000152117	AC093838.4	transcribed_processed_pseudogene				0.913937	4.13555	99.015	2.69862e-17
ENSG00000236432	AC097662.2	antisense				-0.0525653	-0.591364	0.0400916	0.841647
ENSG00000213846	AC098614.2	transcribed_processed_pseudogene				0.432043	2.41665	22.7849	5.25882e-06
ENSG00000227992	AC108463.2	processed_pseudogene				0.0360848	-0.547214	0.0173299	0.895492
ENSG00000226789	AC110926.4	processed_pseudogene				-0.702061	0.474036	13.2996	0.00039679
ENSG00000233223	AC113189.5	antisense				0.208459	2.00427	1.99406	0.160557
ENSG00000254893	AC113404.1	protein_coding	Small GTPase superfamily			-0.0867179	-0.4278	0.162689	0.687425
ENSG00000274425	AC114271.2	antisense				-0.132925	2.68752	1.44059	0.232454
ENSG00000235486	AC114755.7	unprocessed_pseudogene				-1.16345	1.83261	78.8295	9.05309e-15
ENSG00000231259	AC125232.1	unprocessed_pseudogene				-0.564064	1.71102	26.3276	1.14961e-06
ENSG00000279396	AC130469.1	TEC				5.07908	-1.11791	26.3064	1.43676e-06
ENSG00000274767	AC131056.3	antisense				2.52256	-1.05727	6.26131	0.0138298
ENSG00000215154	AC141586.5	transcribed_unprocessed_pseudogene				-0.0331093	-0.47581	0.014799	0.903383
ENSG00000276728	AC142472.6	lincRNA				1.42804	-0.90926	17.4055	5.80763e-05
ENSG00000235078	AC142528.1	antisense				0.235889	-0.327312	0.64439	0.423744
ENSG00000273117	AC144652.1	lincRNA				2.22781	2.16729	213.638	3.23571e-28
ENSG00000261888	AC144831.1	lincRNA				3.01525	3.17152	273.872	1.67793e-32
ENSG00000274370	AC144831.3	lincRNA				2.66646	1.69102	108.904	1.90674e-18
ENSG00000271254	AC240274.1	protein_coding	Neuroblastoma breakpoint family (NBPF) domain			1.29685	3.42738	160.689	9.60426e-24
ENSG00000280649	AC245100.1	protein_coding				0.98098	0.075747	15.151	0.000165063
ENSG00000060971	ACAA1	protein_coding	Thiolase	acetyl-CoA acyltransferase 1	ACETYL-CoA ACYLTRANSFERASE 1; ACAA1;;ACETYL-CoA ACYLTRANSFERASE; ACAA;;PEROXISOMAL 3-OXOACYL-CoA THIOLASE; PTHIO; THIO;;3-@OXOACYL-CoA THIOLASE, PEROXISOMAL	0.629215	6.18466	123.841	4.31997e-20
ENSG00000278540	ACACA	protein_coding	Carboxyl transferase	acetyl-CoA carboxylase alpha	ACETYL-CoA CARBOXYLASE-ALPHA; ACACA;;ACCA;;ACETYL-CoA CARBOXYLASE 1; ACC1	-0.278034	7.69653	21.5481	9.04032e-06
ENSG00000076555	ACACB	protein_coding	Carboxyl transferase	acetyl-CoA carboxylase beta		0.41018	4.38725	16.2613	9.83795e-05
ENSG00000111271	ACAD10	protein_coding	Phosphoglycolate phosphatase, domain 2	acyl-CoA dehydrogenase family member 10	ACYL-CoA DEHYDROGENASE FAMILY, MEMBER 10; ACAD10	0.519662	4.43827	66.9315	3.74768e-13
ENSG00000240303	ACAD11	protein_coding	Aminoglycoside phosphotransferase	acyl-CoA dehydrogenase family member 11	ACYL-CoA DEHYDROGENASE FAMILY, MEMBER 11; ACAD11	1.44405	0.464243	23.4957	3.86198e-06
ENSG00000151498	ACAD8	protein_coding	Acyl-CoA dehydrogenase, conserved site	acyl-CoA dehydrogenase family member 8	ACYL-CoA DEHYDROGENASE FAMILY, MEMBER 8; ACAD8	0.0947356	4.82951	3.1017	0.0808086
ENSG00000177646	ACAD9	protein_coding		acyl-CoA dehydrogenase family member 9	ACYL-CoA DEHYDROGENASE FAMILY, MEMBER 9; ACAD9	-0.717962	5.65118	200.667	3.42907e-27
ENSG00000117054	ACADM	protein_coding	Acyl-CoA dehydrogenase, conserved site	acyl-CoA dehydrogenase, C-4 to C-12 straight chain	ACYL-CoA DEHYDROGENASE, MEDIUM-CHAIN; ACADM;;MEDIUM-CHAIN ACYL-CoA DEHYDROGENASE; MCAD; MCADH	0.0519592	6.1483	0.603635	0.438754
ENSG00000122971	ACADS	protein_coding	Acyl-CoA dehydrogenase, conserved site	acyl-CoA dehydrogenase, C-2 to C-3 short chain	ACYL-CoA DEHYDROGENASE, SHORT-CHAIN; ACADS;;SHORT-CHAIN ACYL-CoA DEHYDROGENASE; SCAD;;ACYL-CoA DEHYDROGENASE, C-2 TO C-3 SHORT CHAIN	0.403609	2.0047	7.28093	0.00799443
ENSG00000196177	ACADSB	protein_coding	Acyl-CoA dehydrogenase, conserved site	acyl-CoA dehydrogenase, short/branched chain	ACYL-CoA DEHYDROGENASE, SHORT/BRANCHED CHAIN; ACADSB;;SBCAD;;2-@METHYLBUTYRYL-CoA DEHYDROGENASE	-0.402036	4.03021	24.9546	2.06128e-06
ENSG00000072778	ACADVL	protein_coding	Acyl-CoA dehydrogenase, conserved site	acyl-CoA dehydrogenase, very long chain	ACYL-CoA DEHYDROGENASE, VERY LONG-CHAIN; ACADVL;;VLCAD	-0.324882	6.46576	28.2817	5.06394e-07
ENSG00000072818	ACAP1	protein_coding	Phosphatidylinositol-specific phospholipase C, X domain	ArfGAP with coiled-coil, ankyrin repeat and PH domains 1	CENTAURIN, BETA-1; CENTB1;;KIAA0050;;ARF-GAP WITH COILED-COIL, ANKYRIN REPEAT, AND PLECKSTRIN HOMOLOGYDOMAINS 1; ACAP1	1.03476	6.49581	191.16	2.05893e-26
ENSG00000114331	ACAP2	protein_coding	Arf GTPase activating protein	ArfGAP with coiled-coil, ankyrin repeat and PH domains 2	CENTAURIN, BETA-2; CENTB2;;KIAA0041;;ARF-GAP WITH COILED-COIL, ANKYRIN REPEAT, AND PLECKSTRIN HOMOLOGYDOMAINS 2; ACAP2	0.799102	7.66914	125.342	2.99212e-20
ENSG00000229325	ACAP2-IT1	sense_intronic				0.861242	-0.805077	5.10336	0.0257211
ENSG00000131584	ACAP3	protein_coding	Arf GTPase activating protein	ArfGAP with coiled-coil, ankyrin repeat and PH domains 3		0.627985	5.46575	40.926	3.33817e-09
ENSG00000075239	ACAT1	protein_coding	Thiolase	acetyl-CoA acetyltransferase 1	ACETYL-CoA ACETYLTRANSFERASE 1; ACAT1;;ACAT;;ACETOACETYL-CoA THIOLASE, MITOCHONDRIAL;;T2;;MITOCHONDRIAL ACETOACETYL-CoA THIOLASE; MAT	-1.59013	6.1724	442.478	1.12066e-41
ENSG00000120437	ACAT2	protein_coding	Thiolase	acetyl-CoA acetyltransferase 2	ACETYL-CoA ACETYLTRANSFERASE 2; ACAT2;;ACETOCOENZYME A ACETYLTRANSFERASE 2;;ACETOACETYL-CoA THIOLASE, CYTOSOLIC	0.977881	7.68892	87.0933	8.81986e-16
ENSG00000182827	ACBD3	protein_coding	Acyl-CoA-binding protein, ACBP	acyl-CoA binding domain containing 3	ACYL-CoA-BINDING DOMAIN-CONTAINING PROTEIN 3; ACBD3;;GOLGI COMPLEX-ASSOCIATED PROTEIN 1; GOCAP1;;GOLGI PHOSPHOPROTEIN 1; GOLPH1;;GOLGI COMPLEX-ASSOCIATED PROTEIN, 60-KD; GCP60	0.109416	5.94454	4.42257	0.0375979
ENSG00000181513	ACBD4	protein_coding	Acyl-CoA-binding protein, ACBP	acyl-CoA binding domain containing 4		0.997235	2.34056	44.0748	1.02334e-09
ENSG00000107897	ACBD5	protein_coding	Acyl-CoA-binding protein, ACBP	acyl-CoA binding domain containing 5	ACYL-CoA-BINDING DOMAIN-CONTAINING PROTEIN 5; ACBD5;;KIAA1996	0.0332946	5.2299	0.410559	0.522932
ENSG00000230124	ACBD6	protein_coding	Acyl-CoA-binding protein, ACBP	LHX4 antisense RNA 1	ACYL-CoA-BINDING DOMAIN-CONTAINING PROTEIN 6; ACBD6	-0.605814	5.52483	136.676	2.0075e-21
ENSG00000102977	ACD	protein_coding	Adrenocortical dysplasia protein	adrenocortical dysplasia homolog	ACD, MOUSE, HOMOLOG OF; ACD;;POT1- AND TIN2-ORGANIZING PROTEIN; PTOP;;POT1-INTERACTING PROTEIN 1; PIP1;;TIN2-INTERACTING PROTEIN 1; TINT1;;TELOMERE PROTEIN TPP1	-0.742012	5.2437	86.8053	8.48002e-16
ENSG00000177076	ACER2	protein_coding	Ceramidase	alkaline ceramidase 2	ALKALINE CERAMIDASE 2; ACER2;;ALKALINE CDase 2;;ALKCDase2	0.223848	-0.536672	0.707221	0.402074
ENSG00000078124	ACER3	protein_coding	Ceramidase	alkaline ceramidase 3	ALKALINE CERAMIDASE 3; ACER3;;ALKALINE PHYTOCERAMIDASE; APHC;;PHYTOCERAMIDASE, ALKALINE; PHCA	0.789316	5.65332	93.3967	1.28556e-16
ENSG00000100813	ACIN1	protein_coding	Nucleotide-binding alpha-beta plait domain	apoptotic chromatin condensation inducer 1	APOPTOTIC CHROMATIN CONDENSATION INDUCER 1; ACIN1;;APOPTOTIC CHROMATIN CONDENSATION INDUCER IN THE NUCLEUS; ACINUS	0.156913	8.17595	9.77165	0.00223292
ENSG00000144648	ACKR2	protein_coding	G protein-coupled receptor, rhodopsin-like	atypical chemokine receptor 2	ATYPICAL CHEMOKINE RECEPTOR 2; ACKR2;;CHEMOKINE-BINDING PROTEIN 2; CCBP2;;CMKBR9;;D6	2.38718	-0.424356	29.8955	2.59758e-07
ENSG00000131473	ACLY	protein_coding	Citrate synthase	ATP citrate lyase		0.0394714	9.14122	0.595266	0.441937
ENSG00000122729	ACO1	protein_coding	Aconitase A/isopropylmalate dehydratase small subunit, swivel domain	aconitase 1	ACONITASE 1, SOLUBLE; ACO1;;ACONITATE HYDRATASE, SOLUBLE;;ACONITASE, SOLUBLE; ACONS;;IRON-RESPONSIVE ELEMENT-BINDING PROTEIN 1; IREB1;;IRE-BINDING PROTEIN 1; IREBP1; IREBP;;IRON REGULATORY PROTEIN 1; IRP1	-0.0480165	4.22266	0.563931	0.45418
ENSG00000100412	ACO2	protein_coding	Aconitase A/isopropylmalate dehydratase small subunit, swivel domain	aconitase 2	ACONITASE, MITOCHONDRIAL; ACO2;;ACONM	-0.385047	7.20611	47.7751	2.63123e-10
ENSG00000162390	ACOT11	protein_coding	START domain	acyl-CoA thioesterase 11	ACYL-CoA THIOESTERASE 11; ACOT11;;THIOESTERASE, ADIPOSE-ASSOCIATED; THEA;;BROWN FAT-INDUCIBLE THIOESTERASE; BFIT;;KIAA0707BFIT1, INCLUDED;;BFIT2, INCLUDED	0.909153	4.01009	72.8329	5.73731e-14
ENSG00000112304	ACOT13	protein_coding	Phenylacetic acid degradation-related domain	acyl-CoA thioesterase 13	ACYL-CoA THIOESTERASE 13; ACOT13;;THIOESTERASE SUPERFAMILY MEMBER 2; THEM2	-0.650676	3.99111	83.978	1.94165e-15
ENSG00000097021	ACOT7	protein_coding	Thioesterase domain	acyl-CoA thioesterase 7	ACYL-CoA THIOESTERASE 7; ACOT7;;ACYL-CoA THIOESTERASE, LONG-CHAIN, CYTOSOLIC;;ACYL-CoA THIOESTERASE ; ACT;;CTE-II;;ACYL-CoA THIOESTER HYDROLASE, LONG-CHAIN, 2;;ACYL-CoA HYDROLASE, LONG-CHAIN, BRAIN; BACH;;ACYL-CoA HYDROLASE, LONG-CHAIN, LIVER; LACH; /.../CoA THIOESTERASE 2, FORMERLY	-0.95774	5.84864	122.268	6.3642e-20
ENSG00000101473	ACOT8	protein_coding	Acyl-CoA thioesterase	acyl-CoA thioesterase 8	ACYL-CoA THIOESTERASE 8; ACOT8;;PEROXISOMAL ACYL-CoA THIOESTERASE 1; PTE1	0.132949	4.25999	2.88623	0.0919823
ENSG00000123130	ACOT9	protein_coding	Thioesterase domain	acyl-CoA thioesterase 9	ACYL-CoA THIOESTERASE 9; ACOT9;;MITOCHONDRIAL ACYL-CoA THIOESTERASE, 48-KD; MTACT48	0.396965	4.71308	47.0017	3.48555e-10
ENSG00000161533	ACOX1	protein_coding	Acyl-CoA oxidase, C-terminal	acyl-CoA oxidase 1	ACYL-CoA OXIDASE 1, PALMITOYL; ACOX1;;ACYL-CoA OXIDASE, PALMITOYL, PEROXISOMAL;;ACYL-CoA OXIDASE; ACOX;;PALMITOYL-CoA OXIDASE;;ACYL-CoA OXIDASE, STRAIGHT-CHAIN; SCOX	0.497853	5.84527	67.8637	2.77486e-13
ENSG00000087008	ACOX3	protein_coding	Acyl-CoA oxidase, C-terminal	acyl-CoA oxidase 3, pristanoyl	ACYL-CoA OXIDASE 3, PRISTANOYL; ACOX3;;ACYL-CoA OXIDASE, PRISTANOYL, PEROXISOMAL;;PRISTANOYL-CoA OXIDASE	-0.594879	4.57639	105.035	5.30083e-18
ENSG00000143727	ACP1	protein_coding	Protein-tyrosine phosphatase, low molecular weight, mammalian	acid phosphatase 1, soluble	ACID PHOSPHATASE 1, SOLUBLE; ACP1;;PHOSPHATASE, ACID, OF ERYTHROCYTE	-0.720118	6.9586	208.545	8.08301e-28
ENSG00000134575	ACP2	protein_coding	Histidine phosphatase superfamily, clade-2	acid phosphatase 2, lysosomal	ACID PHOSPHATASE 2, LYSOSOMAL; ACP2;;PHOSPHATASE, ACID, OF TISSUES;;LYSOSOMAL ACID PHOSPHATASE;;ACP2--BETA POLYPEPTIDE	0.434536	4.57585	51.8163	6.19151e-11
ENSG00000014257	ACPP	protein_coding	Histidine phosphatase superfamily, clade-2	acid phosphatase, prostate	PHOSPHATASE, PROSTATE-SPECIFIC ACID; ACPP;;PROSTATIC ACID PHOSPHATASE; PAP	1.0972	4.86354	195.271	9.42061e-27
ENSG00000111644	ACRBP	protein_coding	Proacrosin binding sp32	acrosin binding protein	ACROSIN-BINDING PROTEIN; ACRBP;;PROACROSIN-BINDING PROTEIN SP32 PRECURSOR; SP32;;OY-TES-1	1.24361	0.213753	30.0332	2.45472e-07
ENSG00000167107	ACSF2	protein_coding		acyl-CoA synthetase family member 2	ACYL-CoA SYNTHETASE FAMILY, MEMBER 2; ACSF2;;FLJ20920	1.3444	2.46002	115.389	3.57356e-19
ENSG00000176715	ACSF3	protein_coding	AMP-dependent synthetase/ligase	acyl-CoA synthetase family member 3	ACYL-CoA SYNTHETASE FAMILY, MEMBER 3; ACSF3	-0.376708	4.20192	20.269	1.59322e-05
ENSG00000151726	ACSL1	protein_coding	AMP-dependent synthetase/ligase	acyl-CoA synthetase long-chain family member 1	ACYL-CoA SYNTHETASE LONG CHAIN FAMILY, MEMBER 1; ACSL1;;FATTY ACID CoA LIGASE, LONG CHAIN 2; FACL2;;LONG CHAIN ACYL-CoA SYNTHETASE 2; LACS2;;PALMITOYL-CoA LIGASE 2;;FATTY ACID CoA LIGASE, LONG CHAIN 1; FACL1;;LONG CHAIN ACYL-CoA SYNTHETASE; LACS;;AC /.../ SYNTHETASE 1; ACS1;;PALMITOYL-CoA LIGASE 1	0.611741	7.88585	98.4834	3.12258e-17
ENSG00000123983	ACSL3	protein_coding	AMP-dependent synthetase/ligase	acyl-CoA synthetase long-chain family member 3	ACYL-CoA SYNTHETASE LONG CHAIN FAMILY, MEMBER 3; ACSL3;;FATTY ACID CoA LIGASE, LONG CHAIN 3; FACL3;;ACYL-CoA SYNTHETASE 3; ACS3	0.553191	7.37254	65.6191	5.73708e-13
ENSG00000068366	ACSL4	protein_coding	AMP-dependent synthetase/ligase	acyl-CoA synthetase long-chain family member 4	ACYL-CoA SYNTHETASE LONG CHAIN FAMILY, MEMBER 4; ACSL4;;FATTY ACID CoA LIGASE, LONG CHAIN 4; FACL4;;ACYL-CoA SYNTHETASE 4; ACS4	0.287923	7.6992	15.2208	0.00015975
ENSG00000197142	ACSL5	protein_coding	AMP-dependent synthetase/ligase	acyl-CoA synthetase long-chain family member 5	ACYL-CoA SYNTHETASE LONG CHAIN FAMILY, MEMBER 5; ACSL5;;FATTY ACID CoA LIGASE, LONG CHAIN 5; FACL5;;ACYL-CoA SYNTHETASE 5; ACS5	-0.741108	6.21037	205.43	1.42526e-27
ENSG00000005187	ACSM3	protein_coding		acyl-CoA synthetase medium-chain family member 3	ACYL-CoA SYNTHETASE MEDIUM CHAIN FAMILY, MEMBER 3; ACSM3;;SA, RAT, HOMOLOG OF; SA; SAH	-1.50973	0.813747	33.0596	7.18535e-08
ENSG00000154930	ACSS1	protein_coding	AMP-dependent synthetase/ligase	acyl-CoA synthetase short-chain family member 1	ACYL-CoA SYNTHETASE SHORT CHAIN FAMILY, MEMBER 1; ACSS1;;ACYL-CoA SYNTHETASE 1; ACECS1	-0.254273	5.13026	12.2088	0.000671261
ENSG00000131069	ACSS2	protein_coding	AMP-dependent synthetase/ligase	acyl-CoA synthetase short-chain family member 2	ACETYL-CoA SYNTHETASE SHORT CHAIN FAMILY, MEMBER 2; ACSS2;;ACS;;ACETATE-CoA LIGASE;;ACYL-CoA SYNTHETASE 1; ACECS1	2.42098	6.95259	738.433	1.55967e-52
ENSG00000111058	ACSS3	protein_coding	AMP-dependent synthetase/ligase	acyl-CoA synthetase short-chain family member 3	ACYL-CoA SYNTHETASE SHORT CHAIN FAMILY, MEMBER 3; ACSS3	2.67244	-0.961051	32.1155	1.05094e-07
ENSG00000107796	ACTA2	protein_coding	Actin family	actin, alpha 2, smooth muscle, aorta	ACTIN, ALPHA-2, SMOOTH MUSCLE, AORTA; ACTA2;;ACTIN, ALPHA, SMOOTH MUSCLE, AORTIC; ACTSA;;ACTIN, VASCULAR SMOOTH MUSCLE	1.44261	-0.0220081	13.9043	0.000297347
ENSG00000075624	ACTB	protein_coding	Actin family	actin beta	ACTIN, BETA; ACTB;;BETA-ACTIN;;ACTIN, CYTOPLASMIC, 1	0.0205496	12.291	0.0724019	0.788342
ENSG00000213763	ACTBP2	processed_pseudogene				-0.148064	0.957866	0.59746	0.441099
ENSG00000184009	ACTG1	protein_coding	Actin family	actin gamma 1	ACTIN, GAMMA-1; ACTG1;;ACTIN, GAMMA; ACTG;;CYTOSKELETAL GAMMA-ACTIN;;ACTIN, CYTOPLASMIC, 2	-0.102572	12.2946	2.05024	0.154833
ENSG00000182584	ACTL10	protein_coding	Actin family	actin like 10		0.706194	0.7049	10.2241	0.0017808
ENSG00000136518	ACTL6A	protein_coding	Actin family	actin like 6A	ACTIN-LIKE 6A; ACTL6A;;BRG1-ASSOCIATED FACTOR, 53-KD; BAF53;;BAF53A;;ACTIN-RELATED PROTEIN, BETA;;ARPN-BETA	-0.712753	6.5303	152.774	5.29754e-23
ENSG00000117148	ACTL8	protein_coding	Actin family	actin like 8		-2.99563	6.7763	92.2169	3.40607e-16
ENSG00000072110	ACTN1	protein_coding	Actinin-type actin-binding domain, conserved site	actinin alpha 1	ACTININ, ALPHA-1; ACTN1	0.0849022	7.2452	1.8879	0.17205
ENSG00000130402	ACTN4	protein_coding	Actinin-type actin-binding domain, conserved site	actinin alpha 4	ACTININ, ALPHA-4; ACTN4;;ACTININ-4	0.2739	8.85888	17.2142	6.34e-05
ENSG00000131966	ACTR10	protein_coding	Actin family	actin-related protein 10 homolog		-0.10089	5.33426	2.11452	0.14857
ENSG00000138107	ACTR1A	protein_coding	Actin family	ARP1 actin-related protein 1 homolog A, centractin alpha	ACTIN-RELATED PROTEIN 1A; ACTR1A;;ARP1;;CENTRACTIN, ALPHA	-0.0804719	6.56894	4.03446	0.0468699
ENSG00000115073	ACTR1B	protein_coding	Actin family	ARP1 actin-related protein 1 homolog B, centractin beta	ACTIN-RELATED PROTEIN 1B; ACTR1B;;ARP1B;;CENTRACTIN, BETA;;CTRN2	0.460105	6.52421	46.5794	4.06645e-10
ENSG00000138071	ACTR2	protein_coding	Actin family	ARP2 actin related protein 2 homolog	ACTIN-RELATED PROTEIN 2; ACTR2;;ARP2ARP2/3 COMPLEX, INCLUDED	0.377145	10.1065	34.6855	3.75609e-08
ENSG00000115091	ACTR3	protein_coding	Actin family	ARP3 actin related protein 3 homolog	ACTIN-RELATED PROTEIN 3; ACTR3;;ARP3	-0.00403503	8.77021	0.00677937	0.934519
ENSG00000133627	ACTR3B	protein_coding	Actin family	ARP3 actin related protein 3 homolog B		-1.10696	3.23967	166.683	2.72258e-24
ENSG00000101442	ACTR5	protein_coding	Actin family	ARP5 actin-related protein 5 homolog		-0.416053	3.60324	30.7596	1.82313e-07
ENSG00000075089	ACTR6	protein_coding	Actin family	ARP6 actin-related protein 6 homolog		-0.230048	4.39326	5.38778	0.0219997
ENSG00000113812	ACTR8	protein_coding	Actin family	ARP8 actin-related protein 8 homolog		0.0148871	5.41139	0.147612	0.701522
ENSG00000115170	ACVR1	protein_coding	Ser/Thr protein kinase, TGFB receptor	activin A receptor type 1	ACTIVIN A RECEPTOR, TYPE I; ACVR1;;ACTIVIN A RECEPTOR, TYPE II-LIKE KINASE 2; ACVRLK2;;ACTIVIN RECEPTOR-LIKE KINASE 2; ALK2	1.97925	0.567403	36.347	1.95122e-08
ENSG00000135503	ACVR1B	protein_coding	Ser/Thr protein kinase, TGFB receptor	activin A receptor type 1B	ACTIVIN A RECEPTOR, TYPE IB; ACVR1B;;ACTIVIN A RECEPTOR, TYPE II-LIKE KINASE 4; ACVRLK4;;ACTIVIN RECEPTOR-LIKE KINASE 4; ALK4	-0.153165	5.91451	7.24099	0.00816345
ENSG00000121989	ACVR2A	protein_coding	Ser/Thr protein kinase, TGFB receptor	activin A receptor type 2A	ACTIVIN A RECEPTOR, TYPE IIA; ACVR2A;;ACVR2	0.902555	1.21137	26.1624	1.23285e-06
ENSG00000114739	ACVR2B	protein_coding	Ser/Thr protein kinase, TGFB receptor	activin A receptor type 2B	ACTIVIN A RECEPTOR, TYPE IIB; ACVR2B;;ACTRIIB	-0.857063	5.90443	153.663	4.36212e-23
ENSG00000243989	ACY1	protein_coding	ArgE/DapE/ACY1/CPG2/YscS, conserved site	aminoacylase 1	AMINOACYLASE 1; ACY1;;N-ACYL-L-AMINO ACID AMIDOHYDROLASE;;ACYLASE	-1.76693	-0.812076	38.9139	7.20153e-09
ENSG00000119640	ACYP1	protein_coding	Acylphosphatase-like domain	acylphosphatase 1	ACYLPHOSPHATASE, ERYTHROCYTE; ACYP1;;ACYPE	1.02857	1.02489	45.8795	5.25486e-10
ENSG00000170634	ACYP2	protein_coding		acylphosphatase 2	ACYLPHOSPHATASE 2, MUSCLE TYPE; ACYP2;;ACYLPHOSPHATASE, MUSCLE; ACYP	1.18519	3.00504	113.156	6.32618e-19
ENSG00000196839	ADA	protein_coding	Adenosine/AMP deaminase domain	adenosine deaminase	ADENOSINE DEAMINASE; ADA;;ADENOSINE AMINOHYDROLASE	-0.707524	5.62896	66.3124	4.57956e-13
ENSG00000137845	ADAM10	protein_coding	Peptidase M12B, ADAM/reprolysin	ADAM metallopeptidase domain 10	A DISINTEGRIN AND METALLOPROTEINASE DOMAIN 10; ADAM10;;AD10;;KUZBANIAN, DROSOPHILA, HOMOLOG OF; KUZ	0.595105	8.07184	114.41	4.58692e-19
ENSG00000073670	ADAM11	protein_coding	EGF-like domain	ADAM metallopeptidase domain 11	A DISINTEGRIN AND METALLOPROTEINASE DOMAIN 11; ADAM11;;METALLOPROTEINASE-LIKE, DISINTEGRIN-LIKE, AND CYSTEINE-RICH PROTEIN;MDC	0.414559	2.75379	5.78839	0.0176895
ENSG00000143537	ADAM15	protein_coding	EGF-like domain	ADAM metallopeptidase domain 15	A DISINTEGRIN AND METALLOPROTEINASE DOMAIN 15; ADAM15;;METALLOPROTEINASE-LIKE, DISINTEGRIN-LIKE, AND CYSTEINE-RICH PROTEIN15; MDC15;;METARGIDIN	-0.735811	7.74526	100.489	1.80418e-17
ENSG00000151694	ADAM17	protein_coding	Peptidase M12B, ADAM/reprolysin	ADAM metallopeptidase domain 17	A DISINTEGRIN AND METALLOPROTEINASE DOMAIN 17; ADAM17;;TUMOR NECROSIS FACTOR-ALPHA CONVERTING ENZYME; TACE	0.535866	6.37517	129.355	1.13323e-20
ENSG00000008277	ADAM22	protein_coding	Peptidase M12B, ADAM/reprolysin	ADAM metallopeptidase domain 22	A DISINTEGRIN AND METALLOPROTEINASE DOMAIN 22; ADAM22;;METALLOPROTEINASE-LIKE, DISINTEGRIN-LIKE, AND CYSTEINE-RICH PROTEIN2; MDC2	-0.47302	4.0362	36.8315	1.61436e-08
ENSG00000042980	ADAM28	protein_coding	EGF-like domain	ADAM metallopeptidase domain 28	A DISINTEGRIN AND METALLOPROTEINASE DOMAIN 28; ADAM28;;METALLOPROTEINASE-LIKE, DISINTEGRIN-LIKE, AND CYSTEINE-RICH PROTEIN,LYMPHOCYTE-EXPRESSED; MDCL	2.92902	1.30915	21.3236	1.02042e-05
ENSG00000151651	ADAM8	protein_coding	EGF-like domain	ADAM metallopeptidase domain 8	A DISINTEGRIN AND METALLOPROTEINASE DOMAIN 8; ADAM8;;HUMAN LEUKOCYTE DIFFERENTIATION ANTIGEN; CD156	1.80428	4.38487	153.485	4.53546e-23
ENSG00000168615	ADAM9	protein_coding	Peptidase M12B, propeptide	ADAM metallopeptidase domain 9	A DISINTEGRIN AND METALLOPROTEINASE DOMAIN 9; ADAM9;;MYELOMA CELL METALLOPROTEINASE; MCMP;;METALLOPROTEINASE-LIKE, DISINTEGRIN-LIKE, AND CYSTEINE-RICH PROTEIN9; MDC9	-0.0473321	6.24334	0.78704	0.376807
ENSG00000154734	ADAMTS1	protein_coding	Thrombospondin type-1 (TSP1) repeat	ADAM metallopeptidase with thrombospondin type 1 motif 1	A DISINTEGRIN-LIKE AND METALLOPROTEINASE WITH THROMBOSPONDIN TYPE1 MOTIF, 1; ADAMTS1;;METH1	-1.99539	3.86537	371.782	3.1975e-38
ENSG00000142303	ADAMTS10	protein_coding	Thrombospondin type-1 (TSP1) repeat	ADAM metallopeptidase with thrombospondin type 1 motif 10	A DISINTEGRIN-LIKE AND METALLOPROTEINASE WITH THROMBOSPONDIN TYPE1 MOTIF, 10; ADAMTS10	1.14712	0.688987	7.10981	0.00874518
ENSG00000160323	ADAMTS13	protein_coding	CUB domain	ADAM metallopeptidase with thrombospondin type 1 motif 13	A DISINTEGRIN-LIKE AND METALLOPROTEASE WITH THROMBOSPONDIN TYPE 1MOTIF, 13; ADAMTS13;;VON WILLEBRAND FACTOR-CLEAVING PROTEASE; VWFCP	2.13175	1.08579	61.176	2.484e-12
ENSG00000140470	ADAMTS17	protein_coding	Thrombospondin type-1 (TSP1) repeat	ADAM metallopeptidase with thrombospondin type 1 motif 17	A DISINTEGRIN-LIKE AND METALLOPROTEINASE WITH THROMBOSPONDIN TYPE1 MOTIF, 17; ADAMTS17	-1.40895	1.41561	92.248	1.77815e-16
ENSG00000173157	ADAMTS20	protein_coding	Thrombospondin type-1 (TSP1) repeat	ADAM metallopeptidase with thrombospondin type 1 motif 20	A DISINTEGRIN-LIKE AND METALLOPROTEINASE WITH THROMBOSPONDIN TYPE1 MOTIF, 20; ADAMTS20	0.711377	0.199731	12.9705	0.000464653
ENSG00000154736	ADAMTS5	protein_coding	Thrombospondin type-1 (TSP1) repeat	ADAM metallopeptidase with thrombospondin type 1 motif 5	A DISINTEGRIN-LIKE AND METALLOPROTEINASE WITH THROMBOSPONDIN TYPE1 MOTIF, 5; ADAMTS5;;AGGRECANASE 2;;ADAMTS11, FORMERLY	0.996394	-0.121304	10.199	0.00180324
ENSG00000049192	ADAMTS6	protein_coding	Thrombospondin type-1 (TSP1) repeat	ADAM metallopeptidase with thrombospondin type 1 motif 6	A DISINTEGRIN-LIKE AND METALLOPROTEINASE WITH THROMBOSPONDIN TYPE1 MOTIF, 6; ADAMTS6	2.10789	0.0596598	49.0784	1.64343e-10
ENSG00000143382	ADAMTSL4	protein_coding	Thrombospondin type-1 (TSP1) repeat	ADAMTS like 4	ADAMTS-LIKE 4; ADAMTSL4;;THROMBOSPONDIN REPEAT-CONTAINING 1; TSRC1	2.44304	2.55262	158.498	1.53325e-23
ENSG00000203804	ADAMTSL4-AS1	processed_transcript				1.4556	-1.24423	5.83379	0.0173011
ENSG00000105963	ADAP1	protein_coding	Arf GTPase activating protein	ArfGAP with dual PH domains 1	CENTAURIN, ALPHA-1; CENTA1;;p42-IP4	0.948055	4.11501	52.3876	5.06117e-11
ENSG00000184060	ADAP2	protein_coding	Arf GTPase activating protein	ArfGAP with dual PH domains 2	ARFGAP WITH DUAL PLECKSTRIN HOMOLOGY DOMAINS 2; ADAP2;;CENTAURIN, ALPHA-2; CENTA2	1.74699	2.55446	101.09	1.53226e-17
ENSG00000160710	ADAR	protein_coding	Double-stranded RNA-specific adenosine deaminase (DRADA)	adenosine deaminase, RNA specific	ADENOSINE DEAMINASE, RNA-SPECIFIC; ADAR;;ADENOSINE DEAMINASE, RNA-SPECIFIC, 1; ADAR1;;DOUBLE-STRANDED RNA-SPECIFIC ADENOSINE DEAMINASE; DSRAD; DRADA;;INTERFERON-INDUCED PROTEIN 4; IFI4;;G1P1	-0.084758	9.3821	7.71595	0.00637204
ENSG00000197381	ADARB1	protein_coding	Adenosine deaminase/editase	adenosine deaminase, RNA specific B1		0.995811	5.37718	332.912	4.21511e-36
ENSG00000065457	ADAT1	protein_coding		adenosine deaminase, tRNA specific 1	ADENOSINE DEAMINASE, tRNA-SPECIFIC, 1; ADAT1;;TAD1, S. CEREVISIAE, HOMOLOG OF; TAD1	0.182713	4.23802	8.89073	0.00348438
ENSG00000189007	ADAT2	protein_coding	Cytidine and deoxycytidylate deaminases, zinc-binding	adenosine deaminase, tRNA specific 2	ADENOSINE DEAMINASE, tRNA-SPECIFIC, 2; ADAT2;;TAD2, S. CEREVISIAE, HOMOLOG OF; TAD2	-0.895776	3.43417	74.2885	3.64487e-14
ENSG00000213638	ADAT3	protein_coding	Cytidine and deoxycytidylate deaminases, zinc-binding	adenosine deaminase, tRNA specific 3	ADENOSINE DEAMINASE, tRNA-SPECIFIC, 3; ADAT3;;TAD3, S. CEREVISIAE, HOMOLOG OF; TAD3	-0.414114	1.51777	5.17429	0.024735
ENSG00000063761	ADCK1	protein_coding	UbiB domain	aarF domain containing kinase 1		-0.496066	1.95484	18.0887	4.25164e-05
ENSG00000133597	ADCK2	protein_coding	UbiB domain	aarF domain containing kinase 2		-0.281266	4.45862	17.5481	5.44063e-05
ENSG00000173137	ADCK5	protein_coding		aarF domain containing kinase 5		0.75423	3.91211	53.273	3.7084e-11
ENSG00000161912	ADCY10P1	transcribed_unprocessed_pseudogene				0.646851	1.91709	14.0769	0.000273953
ENSG00000138031	ADCY3	protein_coding	Adenylyl cyclase class-3/4/guanylyl cyclase	adenylate cyclase 3	ADENYLATE CYCLASE 3; ADCY3;;ADENYLYL CYCLASE 3;;KIAA0511	-0.384826	5.28854	20.2	1.64296e-05
ENSG00000129467	ADCY4	protein_coding	Adenylyl cyclase class-3/4/guanylyl cyclase	adenylate cyclase 4	ADENYLATE CYCLASE 4; ADCY4;;ADENYLYL CYCLASE 4	0.836733	-0.541355	3.99776	0.0478651
ENSG00000121281	ADCY7	protein_coding		adenylate cyclase 7		0.913401	8.28304	248.469	8.81213e-31
ENSG00000162104	ADCY9	protein_coding		adenylate cyclase 9	ADENYLATE CYCLASE 9; ADCY9;;ADENYLYL CYCLASE 9	0.531275	5.67229	52.4309	4.98452e-11
ENSG00000087274	ADD1	protein_coding	Alpha-adducin	adducin 1	ADDUCIN 1; ADD1;;ADDUCIN, ALPHA	0.53975	8.09219	207.375	9.99503e-28
ENSG00000148700	ADD3	protein_coding	Class II aldolase/adducin N-terminal	adducin 3	ADDUCIN 3; ADD3;;ADDUCIN, GAMMA;;ADDUCIN-LIKE; ADDLADD3/NUP98 FUSION GENE, INCLUDED	1.31055	7.07253	280.492	6.23593e-33
ENSG00000020181	ADGRA2	protein_coding	Cysteine-rich flanking region, C-terminal	adhesion G protein-coupled receptor A2	ADHESION G PROTEIN-COUPLED RECEPTOR A2; ADGRA2;;G PROTEIN-COUPLED RECEPTOR 124; GPR124;;TUMOR ENDOTHELIAL MARKER 5; TEM5;;KIAA1531	-0.240178	0.0694994	0.71055	0.400972
ENSG00000152990	ADGRA3	protein_coding		adhesion G protein-coupled receptor A3	ADHESION G PROTEIN-COUPLED RECEPTOR A3; ADGRA3;;G PROTEIN-COUPLED RECEPTOR 125; GPR125	-1.44229	5.45466	260.023	1.40677e-31
ENSG00000181790	ADGRB1	protein_coding	GPS motif	adhesion G protein-coupled receptor B1	ADHESION G PROTEIN-COUPLED RECEPTOR B1; ADGRB1;;BRAIN-SPECIFIC ANGIOGENESIS INHIBITOR 1; BAI1;;ANGIOGENESIS INHIBITORY FACTOR, GLIOMA-DERIVED; GDAIF	-2.09478	3.06615	225.579	3.99299e-29
ENSG00000121753	ADGRB2	protein_coding	GPS motif	adhesion G protein-coupled receptor B2	ADHESION G PROTEIN-COUPLED RECEPTOR B2; ADGRB2;;BRAIN-SPECIFIC ANGIOGENESIS INHIBITOR 2; BAI2	1.95506	0.520506	16.2484	9.8971e-05
ENSG00000111452	ADGRD1	protein_coding	GPS motif	adhesion G protein-coupled receptor D1	ADHESION G PROTEIN-COUPLED RECEPTOR D1; ADGRD1;;G PROTEIN-COUPLED RECEPTOR 133; GPR133;;PGR25	1.77253	2.08578	10.7374	0.00138016
ENSG00000174837	ADGRE1	protein_coding	EGF-type aspartate/asparagine hydroxylation site	adhesion G protein-coupled receptor E1	ADHESION G PROTEIN-COUPLED RECEPTOR E1; ADGRE1;;EGF-LIKE MODULE-CONTAINING, MUCIN-LIKE HORMONE RECEPTOR 1; EMR1	2.87614	3.77245	264.641	6.86354e-32
ENSG00000127507	ADGRE2	protein_coding	EGF-type aspartate/asparagine hydroxylation site	adhesion G protein-coupled receptor E2	ADHESION G PROTEIN-COUPLED RECEPTOR E2; ADGRE2;;EGF-LIKE MODULE-CONTAINING, MUCIN-LIKE HORMONE RECEPTOR 2; EMR2	0.125427	4.4791	1.47924	0.226328
ENSG00000131355	ADGRE3	protein_coding	GPS motif	adhesion G protein-coupled receptor E3	ADHESION G PROTEIN-COUPLED RECEPTOR E3; ADGRE3;;EGF-LIKE MODULE-CONTAINING, MUCIN-LIKE HORMONE RECEPTOR 3; EMR3	1.82999	-1.1238	4.276	0.040904
ENSG00000268758	ADGRE4P	transcribed_unprocessed_pseudogene				3.21575	2.28469	136.749	1.97368e-21
ENSG00000123146	ADGRE5	protein_coding	EGF-type aspartate/asparagine hydroxylation site	adhesion G protein-coupled receptor E5	ADHESION G PROTEIN-COUPLED RECEPTOR E5; ADGRE5;;CD97 ANTIGEN; CD97	0.682586	7.70477	78.9089	8.83809e-15
ENSG00000227582	ADGRF5P1	transcribed_processed_pseudogene				-0.0874157	-0.476414	0.0666206	0.796773
ENSG00000182885	ADGRG3	protein_coding	GPS motif	adhesion G protein-coupled receptor G3		0.367753	0.600828	3.44188	0.0660663
ENSG00000159618	ADGRG5	protein_coding	GPS motif	adhesion G protein-coupled receptor G5	ADHESION G PROTEIN-COUPLED RECEPTOR G5; ADGRG5;;G PROTEIN-COUPLED RECEPTOR 114; GPR114	0.752663	5.16447	66.946	3.73018e-13
ENSG00000112414	ADGRG6	protein_coding	GPS motif	adhesion G protein-coupled receptor G6	ADHESION G PROTEIN-COUPLED RECEPTOR G6; ADGRG6;;G PROTEIN-COUPLED RECEPTOR 126; GPR126;;VASCULAR-INDUCIBLE G PROTEIN-COUPLED RECEPTOR; VIGR	0.880526	0.779441	7.52086	0.00716497
ENSG00000072071	ADGRL1	protein_coding	GPS motif	adhesion G protein-coupled receptor L1		-0.9732	5.51779	116.875	2.4507e-19
ENSG00000150471	ADGRL3	protein_coding	GPS motif	adhesion G protein-coupled receptor L3	ADHESION G PROTEIN-COUPLED RECEPTOR L3; ADGRL3;;LATROPHILIN 3; LPHN3;;CALCIUM-INDEPENDENT ALPHA-LATROTOXIN RECEPTOR 3; CIRL3; CL3;;LECTOMEDIN 3; LEC3;;KIAA0768	1.10534	3.46886	11.7089	0.000860785
ENSG00000197894	ADH5	protein_coding	Alcohol dehydrogenase superfamily, zinc-type	alcohol dehydrogenase 5 (class III), chi polypeptide	ALCOHOL DEHYDROGENASE 5, CHI POLYPEPTIDE; ADH5;;ALCOHOL DEHYDROGENASE, CHI ISOZYME;;ADH, CLASS III; ADHX;;FORMALDEHYDE DEHYDROGENASE; FDH;;FORMALDEHYDE DEHYDROGENASE, GLUTATHIONE-DEPENDENT;;S-NITROSOGLUTATHIONE REDUCTASE; GSNOR	-0.640123	6.66575	189.739	2.70459e-26
ENSG00000182551	ADI1	protein_coding	Acireductone dioxygenase ARD family	acireductone dioxygenase 1	ACIREDUCTONE DIOXYGENASE 1; ADI1;;SUBMERGENCE-INDUCED PROTEIN-LIKE; SIPL;;MT1-MMP CYTOPLASMIC TAIL-BINDING PROTEIN 1; MTCBP1	0.286678	7.20509	42.1204	2.12541e-09
ENSG00000159346	ADIPOR1	protein_coding	AdipoR/Haemolysin-III-related	adiponectin receptor 1	ADIPONECTIN RECEPTOR 1; ADIPOR1;;CGI45;;PROGESTIN AND ADIPOQ RECEPTOR FAMILY, MEMBER 1; PAQR1	0.256119	7.39247	50.7413	9.06553e-11
ENSG00000006831	ADIPOR2	protein_coding	AdipoR/Haemolysin-III-related	adiponectin receptor 2	ADIPONECTIN RECEPTOR 2; ADIPOR2;;PROGESTIN AND ADIPOQ RECEPTOR FAMILY, MEMBER 2; PAQR2	0.181237	7.77351	26.1854	1.22092e-06
ENSG00000156110	ADK	protein_coding	Adenosine kinase	adenosine kinase	ADENOSINE KINASE; ADK	-0.589226	6.21852	97.6326	3.94706e-17
ENSG00000148926	ADM	protein_coding	Adrenomedullin	adrenomedullin	ADRENOMEDULLIN; ADM	0.572396	1.28529	6.64074	0.011203
ENSG00000128165	ADM2	protein_coding	Calcitonin/adrenomedullin	adrenomedullin 2	ADRENOMEDULLIN 2; ADM2;;AM2;;INTERMEDIN	-0.628847	3.56673	13.7502	0.000322627
ENSG00000224420	ADM5	protein_coding		adrenomedullin 5 (putative)		-1.02383	1.22824	36.7614	1.65915e-08
ENSG00000101126	ADNP	protein_coding	Homeobox domain	activity dependent neuroprotector homeobox	ACTIVITY-DEPENDENT NEUROPROTECTOR HOMEOBOX; ADNP;;ADNP1;;KIAA0784	-0.16511	7.83258	18.2602	3.93288e-05
ENSG00000101544	ADNP2	protein_coding	Homeobox domain	ADNP homeobox 2		-0.67602	6.91191	231.666	1.41328e-29
ENSG00000181915	ADO	protein_coding	RmlC-like cupin domain	2-aminoethanethiol dioxygenase	2-@AMINOETHANETHIOL DIOXYGENASE; ADO;;CHROMOSOME 10 OPEN READING FRAME 22; C10ORF22;;CYSTEAMINE DIOXYGENASE	-0.192713	5.94055	25.7347	1.47814e-06
ENSG00000128271	ADORA2A	protein_coding	G protein-coupled receptor, rhodopsin-like	adenosine A2a receptor	ADENOSINE A2A RECEPTOR; ADORA2A;;A2AR;;ADORA2;;RDC8	1.59514	-1.355	5.90523	0.0166066
ENSG00000170425	ADORA2B	protein_coding	G protein-coupled receptor, rhodopsin-like	adenosine A2b receptor	ADENOSINE A2B RECEPTOR; ADORA2B;;A2BR	-1.60459	0.628414	53.4793	3.44992e-11
ENSG00000282608	ADORA3	protein_coding	G protein-coupled receptor, rhodopsin-like	adenosine A3 receptor	ADENOSINE A3 RECEPTOR; ADORA3;;A3 ADENOSINE RECEPTOR; A3AR	1.37143	3.06872	38.6321	8.02747e-09
ENSG00000159322	ADPGK	protein_coding		ADP dependent glucokinase	ADP-DEPENDENT GLUCOKINASE; ADPGK;;ADP-GK	0.11252	7.65958	21.9639	7.52978e-06
ENSG00000260898	ADPGK-AS1	antisense				1.41336	-0.352011	20.0488	1.75766e-05
ENSG00000153531	ADPRHL1	protein_coding	ADP-ribosylation/Crystallin J1	ADP-ribosylhydrolase like 1	ADP-RIBOSYLHYDROLASE-LIKE 1; ADPRHL1;;ADP-RIBOSYLHYDROLASE 2; ARH2	0.271646	0.573906	3.03228	0.115368
ENSG00000116863	ADPRHL2	protein_coding	ADP-ribosylation/Crystallin J1	ADP-ribosylhydrolase like 2	ADP-RIBOSYLHYDROLASE-LIKE 2; ADPRHL2;;ADP-RIBOSYLHYDROLASE 3; ARH3	-0.48413	4.92948	55.2192	1.88299e-11
ENSG00000170222	ADPRM	protein_coding	Calcineurin-like phosphoesterase domain, apaH type	ADP-ribose/CDP-alcohol diphosphatase, manganese dependent		-0.24684	2.02511	4.34958	0.0391798
ENSG00000184160	ADRA2C	protein_coding	G protein-coupled receptor, rhodopsin-like	adrenoceptor alpha 2C	ALPHA-2C-ADRENERGIC RECEPTOR; ADRA2C;;ALPHA-2-ADRENERGIC RECEPTOR, RENAL TYPECONGESTIVE HEART FAILURE AND BETA-BLOCKER RESPONSE, MODIFIER OF, INCLUDED	0.636961	0.768569	2.36057	0.127191
ENSG00000043591	ADRB1	protein_coding	G protein-coupled receptor, rhodopsin-like	adrenoceptor beta 1	BETA-1-ADRENERGIC RECEPTOR; ADRB1;;ADRB1R;;B1ARCONGESTIVE HEART FAILURE AND BETA-BLOCKER RESPONSE, MODIFIER OF, INCLUDED	2.1777	2.06912	124.237	3.92021e-20
ENSG00000169252	ADRB2	protein_coding	G protein-coupled receptor, rhodopsin-like	adrenoceptor beta 2	BETA-2-ADRENERGIC RECEPTOR; ADRB2;;BETA-ADRENERGIC RECEPTOR; ADRBR;;BETA-2-ADRENOCEPTOR; BAR; B2AR;;ADRB2RBETA-2-ADRENORECEPTOR AGONIST, REDUCED RESPONSE TO, INCLUDED	2.39923	3.12547	203.743	1.94198e-27
ENSG00000130706	ADRM1	protein_coding	26S proteasome complex ubiquitin receptor, subunit Rpn13	adhesion regulating molecule 1	ADHESION-REGULATING MOLECULE 1; ADRM1;;ARM1;;RPN13, S. CEREVISIAE, HOMOLOG OF; RPN13	-0.629026	6.50589	58.2417	6.67718e-12
ENSG00000239900	ADSL	protein_coding	Fumarate lyase family	adenylosuccinate lyase	ADENYLOSUCCINATE LYASE; ADSL;;ADENYLOSUCCINASE	-1.43408	7.34276	938.101	6.77194e-58
ENSG00000035687	ADSS	protein_coding	Adenylosuccinate synthetase	adenylosuccinate synthase	ADENYLOSUCCINATE SYNTHETASE; ADSS;;Ade(-)H, COMPLEMENT OF; ADEH	-0.649823	6.36235	119.764	1.18551e-19
ENSG00000185100	ADSSL1	protein_coding	Adenylosuccinate synthetase	adenylosuccinate synthase like 1	ADENYLOSUCCINATE SYNTHASE-LIKE 1; ADSSL1	1.80729	0.316099	39.341	6.11164e-09
ENSG00000251002	AE000661.37	processed_transcript				-2.49171	2.60798	487.863	1.1345e-43
ENSG00000139154	AEBP2	protein_coding	Zinc finger, C2H2	AE binding protein 2		-0.611954	5.36772	92.0836	1.86293e-16
ENSG00000181026	AEN	protein_coding	Ribonuclease H-like domain	apoptosis enhancing nuclease	APOPTOSIS-ENHANCING NUCLEASE; AEN;;INTERFERON-STIMULATED EXONUCLEASE GENE 20-KD-LIKE 1; ISG20L1	-1.62716	5.06638	267.082	4.7134e-32
ENSG00000104964	AES	protein_coding	Groucho/TLE, N-terminal Q-rich domain	amino-terminal enhancer of split	AMINO-TERMINAL ENHANCER OF SPLIT; AES;;GROUCHO-RELATED GENE 5; GRG5	0.419844	8.1257	36.8971	1.5735e-08
ENSG00000263335	AF001548.5	antisense				1.1011	0.578954	22.0238	7.33454e-06
ENSG00000235609	AF127936.9	lincRNA				1.82382	1.15122	95.1833	7.78978e-17
ENSG00000130396	AFDN	protein_coding	Ras-associating (RA) domain	afadin, adherens junction formation factor		0.883546	5.0818	98.8467	2.82609e-17
ENSG00000172493	AFF1	protein_coding	Transcription factor AF4/FMR2	AF4/FMR2 family member 1		0.238281	7.5266	20.8262	1.24374e-05
ENSG00000155966	AFF2	protein_coding	Transcription factor AF4/FMR2	AF4/FMR2 family member 2	AF4/FMR2 FAMILY, MEMBER 2; AFF2;;FMR2 GENE; FMR2FRAGILE SITE, FOLIC ACID TYPE, RARE, FRA(X)(q28) E, INCLUDED; FRAXE,INCLUDED	0.106509	5.32999	1.4902	0.224627
ENSG00000072364	AFF4	protein_coding	Transcription factor AF4/FMR2	AF4/FMR2 family member 4	AF4/FMR2 FAMILY, MEMBER 4; AFF4;;ALL1-FUSED GENE FROM CHROMOSOME 5q31; AF5Q31	0.605025	5.96699	119.937	1.13542e-19
ENSG00000223959	AFG3L1P	unitary_pseudogene				0.881974	1.75721	40.3222	4.19974e-09
ENSG00000141385	AFG3L2	protein_coding	Peptidase M41	AFG3 like matrix AAA peptidase subunit 2	ATPase FAMILY GENE 3-LIKE 2; AFG3L2	-0.582191	7.69781	140.664	7.98625e-22
ENSG00000183077	AFMID	protein_coding	Alpha/beta hydrolase fold-3	arylformamidase		-1.16541	4.55593	241.416	2.78e-30
ENSG00000119844	AFTPH	protein_coding	Aftiphilin, clathrin-binding box	aftiphilin		0.249038	6.51292	16.0542	0.000108302
ENSG00000038002	AGA	protein_coding	Peptidase T2, asparaginase 2	aspartylglucosaminidase	ASPARTYLGLUCOSAMINIDASE; AGA;;GLYCOSYLASPARAGINASE	-0.144582	4.25358	4.71693	0.0318737
ENSG00000279058	AGAP14	protein_coding	Arf GTPase activating protein			-0.972382	-1.25511	7.86663	0.00594101
ENSG00000135439	AGAP2	protein_coding	Arf GTPase activating protein	ArfGAP with GTPase domain, ankyrin repeat and PH domain 2		0.604718	5.50286	70.8883	1.0577e-13
ENSG00000133612	AGAP3	protein_coding	Arf GTPase activating protein	ArfGAP with GTPase domain, ankyrin repeat and PH domain 3	ARF GTPase-ACTIVATING PROTEIN WITH GTPase DOMAIN, ANKYRIN REPEAT,AND PLECKSTRIN HOMOLOGY DOMAIN 3; AGAP3;;CENTAURIN, GAMMA-3; CENTG3CRAM-ASSOCIATED GTPase, INCLUDED; CRAG, INCLUDED	-0.493522	6.50863	45.5001	6.04129e-10
ENSG00000188234	AGAP4	protein_coding	Arf GTPase activating protein	ArfGAP with GTPase domain, ankyrin repeat and PH domain 4		1.60573	1.8043	101.954	1.21223e-17
ENSG00000204149	AGAP6	protein_coding	Arf GTPase activating protein	ArfGAP with GTPase domain, ankyrin repeat and PH domain 6		0.958162	3.08026	65.68	5.62444e-13
ENSG00000264204	AGAP7P	unprocessed_pseudogene				-1.17531	0.444595	39.4409	5.88186e-09
ENSG00000204172	AGAP9	protein_coding	Arf GTPase activating protein	ArfGAP with GTPase domain, ankyrin repeat and PH domain 9		1.42288	1.63418	63.2185	1.26053e-12
ENSG00000146856	AGBL3	protein_coding	Peptidase M14, carboxypeptidase A	ATP/GTP binding protein like 3		0.502436	-0.0500631	3.45406	0.0655958
ENSG00000084693	AGBL5	protein_coding		ATP/GTP binding protein like 5	AATP/GTP-BINDING PROTEIN-LIKE 5; AGBL5;;CYTOSOLIC CARBOXYPEPTIDASE 5; CCP5	-0.455387	5.14645	75.9926	2.15266e-14
ENSG00000204305	AGER	protein_coding	Immunoglobulin subtype 2	advanced glycosylation end-product specific receptor	ADVANCED GLYCOSYLATION END PRODUCT-SPECIFIC RECEPTOR; AGER;;RECEPTOR FOR ADVANCED GLYCATION END PRODUCTS; RAGE	1.81879	2.23358	123.693	4.4798e-20
ENSG00000173744	AGFG1	protein_coding	Arf GTPase activating protein	ArfGAP with FG repeats 1	ADP-RIBOSYLATION FACTOR GTPase-ACTIVATING PROTEIN WITH FG REPEATS1; AGFG1;;ARFGAP WITH FG REPEATS 1;;HIV-1 REV-BINDING PROTEIN; HRB;;REV-INTERACTING PROTEIN; RIP;;REV/REX ACTIVATION DOMAIN-BINDING PROTEIN; RAB	0.0587292	6.51569	1.18406	0.278754
ENSG00000106351	AGFG2	protein_coding	Arf GTPase activating protein	ArfGAP with FG repeats 2	ADP-RIBOSYLATION FACTOR GTPase-ACTIVATING PROTEIN WITH FG REPEATS2; AGFG2;;ARFGAP WITH FG REPEATS 2;;HIV-1 REV-BINDING PROTEIN-LIKE; HRBL;;REV/REX ACTIVATION DOMAIN-BINDING PROTEIN-RELATED; RABR	0.948693	3.49948	145.146	2.88307e-22
ENSG00000164252	AGGF1	protein_coding	Forkhead-associated (FHA) domain	angiogenic factor with G-patch and FHA domains 1	ANGIOGENIC FACTOR WITH G-PATCH AND FHA DOMAINS 1; AGGF1;;VG5Q GENE;;FLJ10283	-0.0177084	5.04079	0.114317	0.735884
ENSG00000006530	AGK	protein_coding	Diacylglycerol kinase, catalytic domain	acylglycerol kinase	ACYLGLYCEROL KINASE; AGK;;MULTISUBSTRATE LIPID KINASE; MULK	-0.726756	4.71264	112.328	7.82872e-19
ENSG00000162688	AGL	protein_coding	Glycogen debranching enzyme, metazoa	amylo-alpha-1, 6-glucosidase, 4-alpha-glucanotransferase	AMYLO-1,6-GLUCOSIDASE, 4-ALPHA-GLUCANOTRANSFERASE; AGL;;GLYCOGEN DEBRANCHER ENZYME; GDE	0.764574	3.62831	51.6085	6.66369e-11
ENSG00000092847	AGO1	protein_coding	PAZ domain	argonaute 1, RISC catalytic component	ARGONAUTE 1, RISC CATALYTIC COMPONENT; AGO1;;EUKARYOTIC TRANSLATION INITIATION FACTOR 2C, SUBUNIT 1; EIF2C1;;EIF2C;;GERP95	-0.143415	6.37303	12.8103	0.000501892
ENSG00000123908	AGO2	protein_coding	PAZ domain	argonaute 2, RISC catalytic component	ARGONAUTE 2, RISC CATALYTIC COMPONENT; AGO2;;EUKARYOTIC TRANSLATION INITIATION FACTOR 2C, SUBUNIT 2; EIF2C2	-0.667447	7.60033	107.724	2.5998e-18
ENSG00000126070	AGO3	protein_coding	PAZ domain	argonaute 3, RISC catalytic component	EUKARYOTIC TRANSLATION INITIATION FACTOR 2C, SUBUNIT 3; EIF2C3;;ARGONAUTE 3; AGO3	0.481534	5.03604	34.9351	3.40246e-08
ENSG00000134698	AGO4	protein_coding	PAZ domain	argonaute 4, RISC catalytic component	EUKARYOTIC TRANSLATION INITIATION FACTOR 2C, SUBUNIT 4; EIF2C4;;ARGONAUTE 4; AGO4;;KIAA1567	1.35279	6.63918	428.357	5.05023e-41
ENSG00000204310	AGPAT1	protein_coding	Phospholipid/glycerol acyltransferase	microRNA 6721		-0.149346	6.26917	5.6322	0.0192539
ENSG00000169692	AGPAT2	protein_coding	Phospholipid/glycerol acyltransferase	1-acylglycerol-3-phosphate O-acyltransferase 2	1-@ACYLGLYCEROL-3-PHOSPHATE O-ACYLTRANSFERASE 2; AGPAT2;;LYSOPHOSPHATIDIC ACID ACYLTRANSFERASE-BETA;;LPAAT-BETA	-0.122796	6.51585	2.38821	0.124939
ENSG00000160216	AGPAT3	protein_coding	Phospholipid/glycerol acyltransferase	1-acylglycerol-3-phosphate O-acyltransferase 3	1-@ACYLGLYCEROL-3-PHOSPHATE O-ACYLTRANSFERASE 3; AGPAT3;;1-@ACYL-sn-GLYCEROL 3-PHOSPHATE ACYLTRANSFERASE 3;;LYSOPHOSPHATIDIC ACID ACYLTRANSFERASE, GAMMA;;LPAAT-GAMMA;;LPAAT3	-0.317755	7.03666	63.4934	1.15121e-12
ENSG00000026652	AGPAT4	protein_coding	Phospholipid/glycerol acyltransferase	1-acylglycerol-3-phosphate O-acyltransferase 4	1-@ACYLGLYCEROL-3-PHOSPHATE O-ACYLTRANSFERASE 4; AGPAT4;;1-@ACYL-sn-GLYCEROL 3-PHOSPHATE ACYLTRANSFERASE 4;;LYSOPHOSPHATIDIC ACID ACYLTRANSFERASE, DELTA;;LPAAT-DELTA	0.714353	-0.217729	1.97584	0.162465
ENSG00000155189	AGPAT5	protein_coding	Phospholipid/glycerol acyltransferase	1-acylglycerol-3-phosphate O-acyltransferase 5	1-@ACYLGLYCEROL-3-PHOSPHATE O-ACYLTRANSFERASE 5; AGPAT5;;1-@ACYL-sn-GLYCEROL 3-PHOSPHATE ACYLTRANSFERASE 5;;LYSOPHOSPHATIDIC ACID ACYLTRANSFERASE, EPSILON;;LPAAT-EPSILON	-1.33619	6.77782	349.523	4.9793e-37
ENSG00000018510	AGPS	protein_coding	FAD-linked oxidase, C-terminal	alkylglycerone phosphate synthase	ALKYLGLYCERONE-PHOSPHATE SYNTHASE; AGPS;;ALKYLDIHYDROXYACETONEPHOSPHATE SYNTHASE; ADHAPS;;ALKYL-DHAP SYNTHASE	-0.621339	7.3497	109.273	1.73106e-18
ENSG00000188157	AGRN	protein_coding	SEA domain	agrin		0.452403	6.82303	16.6369	8.35099e-05
ENSG00000135049	AGTPBP1	protein_coding	Peptidase M14, carboxypeptidase A	ATP/GTP binding protein 1	ATP/GTP-BINDING PROTEIN 1; AGTPBP1;;NERVOUS SYSTEM NUCLEAR PROTEIN INDUCED BY AXOTOMY; NNA1;;KIAA1035;;CYTOSOLIC CARBOXYPEPTIDASE 1; CCP1	0.550037	7.10804	84.8645	1.49557e-15
ENSG00000177674	AGTRAP	protein_coding		angiotensin II receptor associated protein	ANGIOTENSIN II RECEPTOR-ASSOCIATED PROTEIN; AGTRAP;;ATRAP	0.681172	5.14981	39.3293	6.1392e-09
ENSG00000153207	AHCTF1	protein_coding	Quinoprotein alcohol dehydrogenase-like superfamily	AT-hook containing transcription factor 1	AT HOOK-CONTAINING TRANSCRIPTION FACTOR 1; AHCTF1;;EMBRYONIC LARGE MOLECULE DERIVED FROM YOLK SAC; ELYS	-0.679786	7.23259	122.652	5.78834e-20
ENSG00000101444	AHCY	protein_coding	Adenosylhomocysteinase	adenosylhomocysteinase	S-ADENOSYLHOMOCYSTEINE HYDROLASE; AHCY;;SAHH	-1.31402	8.09631	320.079	2.31868e-35
ENSG00000168710	AHCYL1	protein_coding	Adenosylhomocysteinase	adenosylhomocysteinase like 1	ADENOSYLHOMOCYSTEINASE-LIKE 2; AHCYL1;;S-ADENOSYLHOMOCYSTEINE HYDROLASE-LIKE 1;;AHCY-LIKE 1;;DENDRITIC CELL-EXPRESSED AHCY-LIKE PROTEIN; DCAL;;INOSITOL 1,4,5-TRISPHOSPHATE RECEPTOR 1-BINDING PROTEIN RELEASED WITHINOSITOL 1,4,5-TRISPHOSPHATE; IRBIT;; /.../BINDING PROTEIN RELEASED WITH IP3	-0.267059	6.94518	65.1579	6.66822e-13
ENSG00000158467	AHCYL2	protein_coding	Adenosylhomocysteinase	adenosylhomocysteinase like 2	ADENOSYLHOMOCYSTEINASE-LIKE 2; AHCYL2;;S-ADENOSYL-L-HOMOCYSTEINE HYDROLASE 3;;INOSITOL 1,4,5-TRISPHOSPHATE RECEPTOR 1-BINDING PROTEIN RELEASED WITHINOSITOL 1,4,5-TRISPHOSPHATE 2; IRBIT2;;ITPR1-BINDING PROTEIN RELEASED WITH IP3 2;;IRBIT, LONG;;KIAA0828	0.811637	5.00604	127.441	1.79694e-20
ENSG00000126705	AHDC1	protein_coding	Domain of unknown function DUF4683	AT-hook DNA binding motif containing 1	AT-HOOK DNA-BINDING MOTIF-CONTAINING PROTEIN 1; AHDC1	-0.159794	4.86111	2.74405	0.100281
ENSG00000135541	AHI1	protein_coding	SH3 domain	Abelson helper integration site 1	ABELSON HELPER INTEGRATION SITE 1; AHI1;;JOUBERIN	-0.0976577	3.16161	1.38131	0.24225
ENSG00000124942	AHNAK	protein_coding	PDZ domain	AHNAK nucleoprotein	AHNAK NUCLEOPROTEIN; AHNAK;;DESMOYOKIN	0.181996	6.9772	2.45244	0.120082
ENSG00000106546	AHR	protein_coding	PAS domain	aryl hydrocarbon receptor	ARYL HYDROCARBON RECEPTOR; AHR	0.715053	3.85365	40.9583	3.29744e-09
ENSG00000063438	AHRR	protein_coding	PAS domain	aryl-hydrocarbon receptor repressor	ARYLHYDROCARBON RECEPTOR REPRESSOR; AHRR;;KIAA1234	0.0770174	6.72594	1.0728	0.302438
ENSG00000100591	AHSA1	protein_coding	Activator of Hsp90 ATPase homologue 1-like	activator of Hsp90 ATPase activity 1	ACTIVATOR OF HEAT-SHOCK 90-KD PROTEIN ATPase 1; AHSA1;;AHA1	-0.920254	5.7472	163.381	5.43417e-24
ENSG00000173209	AHSA2	protein_coding		AHA1, activator of heat shock 90kDa protein ATPase homolog 2 (yeast)		2.39818	4.96073	349.044	5.31035e-37
ENSG00000186063	AIDA	protein_coding	Axin interactor, dorsalization-associated protein, N-terminal	axin interactor, dorsalization associated	AXIN INTERACTOR, DORSALIZATION-ASSOCIATED; AIDA;;AXIN-INTERACTING PROTEIN AND DORSALIZATION ANTAGONIST	-0.519747	4.78733	76.0153	2.13772e-14
ENSG00000204472	AIF1	protein_coding	EF-hand domain	allograft inflammatory factor 1	ALLOGRAFT INFLAMMATORY FACTOR 1; AIF1;;INTERFERON RESPONSE TRANSCRIPT 1; IRT1;;IBA1	0.201815	6.79183	11.0785	0.00116629
ENSG00000156709	AIFM1	protein_coding	Pyridine nucleotide-disulphide oxidoreductase, dimerisation domain	apoptosis inducing factor, mitochondria associated 1	APOPTOSIS-INDUCING FACTOR, MITOCHONDRION-ASSOCIATED, 1; AIFM1;;APOPTOSIS-INDUCING FACTOR; AIF;;PROGRAMMED CELL DEATH 8; PDCD8	-0.901659	5.85805	414.463	2.30861e-40
ENSG00000042286	AIFM2	protein_coding	Pyridine nucleotide-disulphide oxidoreductase, class-II	apoptosis inducing factor, mitochondria associated 2	APOPTOSIS-INDUCING FACTOR, MITOCHONDRION-ASSOCIATED, 2; AIFM2;;p53-RESPONSIVE GENE 3; PRG3	0.71602	-0.697346	4.70793	0.0340282
ENSG00000183773	AIFM3	protein_coding	Pyridine nucleotide-disulphide oxidoreductase, class-II	apoptosis inducing factor, mitochondria associated 3		2.03392	1.25494	92.2684	1.76793e-16
ENSG00000146416	AIG1	protein_coding	FAR-17a/AIG1-like protein	androgen induced 1	ANDROGEN-INDUCED GENE 1; AIG1	0.283603	3.59455	17.4725	5.63222e-05
ENSG00000112297	AIM1	protein_coding	Ricin B, lectin domain	absent in melanoma 1	ABSENT IN MELANOMA 1; AIM1	0.883706	6.14129	131.734	6.42135e-21
ENSG00000164022	AIMP1	protein_coding		aminoacyl tRNA synthetase complex interacting multifunctional protein 1	AMINOACYL-tRNA SYNTHETASE COMPLEX-INTERACTING MULTIFUNCTIONAL PROTEIN1; AIMP1;;ARS-INTERACTING MULTIFUNCTIONAL PROTEIN 1;;ENDOTHELIAL MONOCYTE-ACTIVATING POLYPEPTIDE 2; EMAP2; EMAPII;;SMALL INDUCIBLE CYTOKINE SUBFAMILY E, MEMBER 1, FORMERLY; SCYE1, /.../LY	-0.704875	6.30877	121	8.71511e-20
ENSG00000106305	AIMP2	protein_coding	Glutathione S-transferase, C-terminal	aminoacyl tRNA synthetase complex interacting multifunctional protein 2	AMINOACYL tRNA SYNTHETASE COMPLEX-INTERACTING MULTIFUNCTIONAL PROTEIN2; AIMP2;;JTV1 GENE;;tRNA SYNTHETASE COFACTOR p38; p38	-1.01743	5.25546	169.174	1.62468e-24
ENSG00000110711	AIP	protein_coding	FKBP-type peptidyl-prolyl cis-trans isomerase domain	aryl hydrocarbon receptor interacting protein	ARYL HYDROCARBON RECEPTOR-INTERACTING PROTEIN; AIP;;HEPATITIS B VIRUS X-ASSOCIATED PROTEIN 2; XAP2;;ARA9	0.194427	6.37416	7.41388	0.0074575
ENSG00000129474	AJUBA	protein_coding	Zinc finger, LIM-type	ajuba LIM protein	AJUBA, MOUSE, HOMOLOG OF; JUB	-0.771279	3.66551	91.5585	2.16229e-16
ENSG00000106992	AK1	protein_coding	Adenylate kinase/UMP-CMP kinase	adenylate kinase 1	ADENYLATE KINASE 1; AK1;;ADENYLATE KINASE, SOLUBLE	0.484557	-1.4219	0.625941	0.43044
ENSG00000004455	AK2	protein_coding	Adenylate kinase/UMP-CMP kinase	adenylate kinase 2	ADENYLATE KINASE 2; AK2;;ADENYLATE KINASE, MITOCHONDRIAL MYOKINASE	-0.875966	8.01771	257.933	1.95222e-31
ENSG00000147853	AK3	protein_coding	Adenylate kinase/UMP-CMP kinase	adenylate kinase 3	ADENYLATE KINASE 3; AK3;;ADENYLATE KINASE 3-LIKE 1, FORMERLY; AK3L1, FORMERLY	0.227499	5.10766	12.0967	0.00070881
ENSG00000162433	AK4	protein_coding	Adenylate kinase/UMP-CMP kinase	adenylate kinase 4		-1.44876	4.54335	142.341	5.63552e-22
ENSG00000085231	AK6	protein_coding	Adenylate kinase isoenzyme 6	adenylate kinase 6		-1.13141	3.353	124.909	3.32531e-20
ENSG00000155085	AK9	protein_coding	Adenylate kinase/UMP-CMP kinase	adenylate kinase 9	ADENYLATE KINASE 9; AK9	0.78008	1.7548	47.1037	3.35848e-10
ENSG00000121057	AKAP1	protein_coding	A-kinase anchor protein 1, mitochondrial	A-kinase anchoring protein 1	A-KINASE ANCHOR PROTEIN 1; AKAP1;;A-KINASE ANCHOR PROTEIN, 149-KD; AKAP149;;SPERMATID A-KINASE ANCHOR PROTEIN 84; SAKAP84	-1.00119	6.06987	176.708	3.50502e-25
ENSG00000108599	AKAP10	protein_coding	RGS domain	A-kinase anchoring protein 10	A-KINASE ANCHOR PROTEIN 10; AKAP10;;DUAL-SPECIFIC A KINASE-ANCHORING PROTEIN 2; DAKAP2	0.353727	4.68869	32.3355	9.6159e-08
ENSG00000023516	AKAP11	protein_coding	SPHK1-interactor/A-kinase anchor 110kDa	A-kinase anchoring protein 11	A-KINASE ANCHOR PROTEIN 11; AKAP11;;A-KINASE ANCHOR PROTEIN, 220-KD; AKAP220	0.102295	7.19854	2.28307	0.133474
ENSG00000170776	AKAP13	protein_coding	RII binding domain	microRNA 7706	A-KINASE ANCHOR PROTEIN 13; AKAP13LYMPHOID BLAST CRISIS ONCOGENE, INCLUDED; LBC, INCLUDED;;BREAST CANCER cDNA-ENCODED NUCLEAR RECEPTOR-BINDING AUXILIARY PROTEIN1, INCLUDED; BRX1, INCLUDED; BRX, INCLUDED	1.06312	7.33983	196.853	6.99169e-27
ENSG00000197976	AKAP17A	protein_coding	Nucleotide-binding alpha-beta plait domain	A-kinase anchoring protein 17A	A-KINASE ANCHOR PROTEIN 17A, Y-CHROMOSOMAL; AKAP17A;;SPLICING FACTOR, ARGININE/SERINE RICH, 17A, Y-CHROMOSOMAL; SFRS17A;;PSEUDOAUTOSOMAL GENE XE7, Y-CHROMOSOMAL; XE7Y	0.447211	5.57612	30.0085	2.47967e-07
ENSG00000111254	AKAP3	protein_coding	SPHK1-interactor/A-kinase anchor 110kDa	A-kinase anchoring protein 3	A-KINASE ANCHOR PROTEIN 3; AKAP3;;A-KINASE ANCHOR PROTEIN, 110-KD; AKAP110;;FIBROUS SHEATH PROTEIN, 95-KD; FSP95;;SPERM OOCYTE-BINDING PROTEIN 1; SOB1	1.1725	-0.276515	16.7797	7.74206e-05
ENSG00000151320	AKAP6	protein_coding	Spectrin/alpha-actinin	A-kinase anchoring protein 6	A-KINASE ANCHOR PROTEIN 6; AKAP6;;A-KINASE ANCHOR PROTEIN, 100-KD; AKAP100	-0.315838	-0.124442	1.45397	0.230311
ENSG00000105127	AKAP8	protein_coding	A-kinase anchoring protein 95 (AKAP95)	A-kinase anchoring protein 8	A-KINASE ANCHOR PROTEIN 8; AKAP8;;A-KINASE ANCHOR PROTEIN, 95-KD; AKAP95	-0.44375	5.82443	65.4856	5.99219e-13
ENSG00000011243	AKAP8L	protein_coding	A-kinase anchoring protein 95 (AKAP95)	A-kinase anchoring protein 8 like	A-KINASE ANCHOR PROTEIN 8-LIKE PROTEIN; AKAP8L;;AKAP8-LIKE PROTEIN;;HOMOLOGOUS TO AKAP95; HA95;;NEIGHBOR OF AKAP95; NAKAP95; NAKAP;;HELICASE A-BINDING PROTEIN, 95-KD; HAP95	0.566219	6.38994	67.8398	2.79624e-13
ENSG00000127914	AKAP9	protein_coding	ELK domain	A-kinase anchoring protein 9	A-KINASE ANCHOR PROTEIN 9; AKAP9;;YOTIAO;;A-KINASE ANCHOR PROTEIN, 450-KD; AKAP450;;CENTROSOME- AND GOLGI-LOCALIZED PROTEIN KINASE N-ASSOCIATED PROTEIN;CGNAPAKAP9/BRAF FUSION GENE, INCLUDED	0.717928	6.77473	75.9919	2.15312e-14
ENSG00000166452	AKIP1	protein_coding	A-kinase-interacting protein 1	A-kinase interacting protein 1	PROTEIN KINASE A-INTERACTING PROTEIN 1; AKIP1;;PKA-INTERACTING PROTEIN 1;;BREAST CANCER-ASSOCIATED GENE 3; BCA3;;CHROMOSOME 11 OPEN READING FRAME 17; C11ORF17	0.157332	4.02466	6.74824	0.0105825
ENSG00000174574	AKIRIN1	protein_coding	Akirin	akirin 1	AKIRIN 1; AKIRIN1	-0.469922	7.05884	122.541	5.94973e-20
ENSG00000135334	AKIRIN2	protein_coding	Akirin	akirin 2	AKIRIN 2; AKIRIN2	0.150261	6.24805	10.0751	0.0019183
ENSG00000106948	AKNA	protein_coding	Transcription factor, AT-hook-containing	AT-hook transcription factor		1.10022	8.55548	139.728	9.917e-22
ENSG00000117448	AKR1A1	protein_coding	Aldo/keto reductase/potassium channel subunit beta	aldo-keto reductase family 1 member A1	ALDO-KETO REDUCTASE FAMILY 1, MEMBER A1; AKR1A1;;ALDEHYDE REDUCTASE; ALR	-0.469242	5.86499	91.5979	2.1382e-16
ENSG00000053371	AKR7A2	protein_coding	Aldo/keto reductase/potassium channel subunit beta	aldo-keto reductase family 7 member A2	ALDO-KETO REDUCTASE FAMILY 7, MEMBER A2; AKR7A2;;ALDO-KETO REDUCTASE 7; AKR7;;AFLATOXIN B1-ALDEHYDE REDUCTASE; AFAR	0.35824	5.4042	24.942	2.07244e-06
ENSG00000142208	AKT1	protein_coding	Protein kinase domain	AKT serine/threonine kinase 1	V-AKT MURINE THYMOMA VIRAL ONCOGENE HOMOLOG 1; AKT1;;ONCOGENE AKT1;;PROTEIN KINASE B-ALPHA;;PKB-ALPHA;;RAC SERINE/THREONINE PROTEIN KINASE	-0.00722856	7.74764	0.016163	0.899052
ENSG00000204673	AKT1S1	protein_coding	Proline-rich AKT1 substrate 1 protein	AKT1 substrate 1	AKT1 SUBSTRATE 1, PROLINE-RICH; AKT1S1;;PROLINE-RICH AKT SUBSTRATE, 40-KD; PRAS40;;MGC2865	-0.459809	4.98522	39.8234	5.08065e-09
ENSG00000105221	AKT2	protein_coding	Protein kinase domain	AKT serine/threonine kinase 2	V-AKT MURINE THYMOMA VIRAL ONCOGENE HOMOLOG 2; AKT2;;ONCOGENE AKT2;;PROTEIN KINASE B, BETA; PKBB;;PKB-BETA	-0.344139	7.29911	28.5482	4.53271e-07
ENSG00000117020	AKT3	protein_coding	Protein kinase domain	AKT serine/threonine kinase 3	V-AKT MURINE THYMOMA VIRAL ONCOGENE HOMOLOG 3; AKT3;;PROTEIN KINASE B, GAMMA; PKBG;;PKB-GAMMAMAGI3/AKT3 FUSION GENE, INCLUDED	0.259004	1.28373	1.08799	0.299112
ENSG00000166971	AKTIP	protein_coding	Ubiquitin-conjugating enzyme E2	AKT interacting protein	AKT-INTERACTING PROTEIN; AKTIP;;FUSED TOES, MOUSE, HOMOLOG OF; FTS;;FT1	0.443302	3.6725	26.4188	1.10614e-06
ENSG00000233922	AL133493.2	lincRNA				-0.0490154	4.29691	0.420877	0.517764
ENSG00000234648	AL162151.3	processed_pseudogene				0.329289	0.106149	0.91944	0.339589
ENSG00000278384	AL354822.1	protein_coding				-0.378744	-0.325049	2.24602	0.136637
ENSG00000150076	AL356053.1	protein_coding				2.30253	-0.872325	33.8744	5.18626e-08
ENSG00000280316	AL365181.1	protein_coding				-0.331059	-0.338102	2.00286	0.159644
ENSG00000279508	AL589743.1	protein_coding		uncharacterized LOC107987205		-0.242431	2.3172	3.53317	0.0626264
ENSG00000273748	AL592183.1	protein_coding	FRG1-like			-0.0395758	1.97523	0.121966	0.727537
ENSG00000148218	ALAD	protein_coding	Delta-aminolevulinic acid dehydratase	aminolevulinate dehydratase	DELTA-AMINOLEVULINATE DEHYDRATASE; ALAD;;ALADH;;PORPHOBILINOGEN SYNTHASE; PBGS	0.559051	4.97406	63.9518	9.89977e-13
ENSG00000023330	ALAS1	protein_coding	Aminotransferase, class-II, pyridoxal-phosphate binding site	5'-aminolevulinate synthase 1	DELTA-AMINOLEVULINATE SYNTHASE 1; ALAS1;;ALAS;;ALAS, HOUSEKEEPING TYPE; ALASH	0.748404	7.28896	235.946	6.88382e-30
ENSG00000170017	ALCAM	protein_coding	Immunoglobulin subtype 2	activated leukocyte cell adhesion molecule	ACTIVATED LEUKOCYTE CELL ADHESION MOLECULE; ALCAM;;CD166	0.353589	6.46276	44.3826	9.12879e-10
ENSG00000161618	ALDH16A1	protein_coding	Aldehyde dehydrogenase	aldehyde dehydrogenase 16 family member A1	ALDEHYDE DEHYDROGENASE 16 FAMILY, MEMBER A1; ALDH16A1	-0.239301	4.52447	5.12864	0.0253649
ENSG00000059573	ALDH18A1	protein_coding	GPR domain	aldehyde dehydrogenase 18 family member A1	ALDEHYDE DEHYDROGENASE 18 FAMILY, MEMBER A1; ALDH18A1;;1-@PYRROLINE-5-CARBOXYLATE SYNTHETASE; PYCS;;P5CS;;GLUTAMATE GAMMA-SEMIALDEHYDE SYNTHETASE; GSAS	-1.41412	7.43194	566.148	8.76251e-47
ENSG00000128918	ALDH1A2	protein_coding	Aldehyde dehydrogenase domain	aldehyde dehydrogenase 1 family member A2	ALDEHYDE DEHYDROGENASE 1 FAMILY, MEMBER A2; ALDH1A2;;RETINALDEHYDE DEHYDROGENASE 2; RALDH2	1.46854	-0.148668	16.5642	8.67512e-05
ENSG00000137124	ALDH1B1	protein_coding	Aldehyde dehydrogenase domain	aldehyde dehydrogenase 1 family member B1	ALDEHYDE DEHYDROGENASE 1 FAMILY, MEMBER B1; ALDH1B1;;ALDEHYDE DEHYDROGENASE 5; ALDH5;;ACETALDEHYDE DEHYDROGENASE 5	-1.33908	5.18679	194.285	1.13536e-26
ENSG00000144908	ALDH1L1	protein_coding	Phosphoribosylglycinamide formyltransferase, active site	aldehyde dehydrogenase 1 family member L1	ALDEHYDE DEHYDROGENASE 1 FAMILY, MEMBER L1; ALDH1L1;;10-@FORMYLTETRAHYDROFOLATE DEHYDROGENASE; FTHFD;;10-@FORMYLTETRAHYDROFOLATE DEHYDROGENASE, CYTOSOLIC;;CYTOSOLIC 10-FORMYLTETRAHYDROFOLATE DEHYDROGENASE	0.690135	-1.39615	0.892732	0.347169
ENSG00000136010	ALDH1L2	protein_coding	Phosphoribosylglycinamide formyltransferase, active site	aldehyde dehydrogenase 1 family member L2	ALDEHYDE DEHYDROGENASE 1 FAMILY, MEMBER L2; ALDH1L2;;10-@FORMYLTETRAHYDROFOLATE DEHYDROGENASE, MITOCHONDRIAL;;MITOCHONDRIAL 10-FORMYLTETRAHYDROFOLATE DEHYDROGENASE	-0.83974	5.06787	43.1547	1.51333e-09
ENSG00000111275	ALDH2	protein_coding	Aldehyde dehydrogenase domain	aldehyde dehydrogenase 2 family (mitochondrial)	ALDEHYDE DEHYDROGENASE 2 FAMILY; ALDH2;;ALDEHYDE DEHYDROGENASE 2;;ALDH, LIVER MITOCHONDRIAL;;ACETALDEHYDE DEHYDROGENASE 2SUBLINGUAL NITROGLYCERIN, SUSCEPTIBILITY TO POOR RESPONSE TO, INCLUDED;;ALDH2/HMGIC FUSION GENE, INCLUDED;;ESOPHAGEAL CANCER, AL /.../RELATED, SUSCEPTIBILITY TO, INCLUDED	0.875671	0.0508536	10.3519	0.00167107
ENSG00000072210	ALDH3A2	protein_coding	Aldehyde dehydrogenase domain	aldehyde dehydrogenase 3 family member A2	ALDEHYDE DEHYDROGENASE, FAMILY 3, SUBFAMILY A, MEMBER 2; ALDH3A2;;FATTY ALDEHYDE DEHYDROGENASE; FALDH;;ALDEHYDE DEHYDROGENASE 10; ALDH10	-0.269823	5.38095	34.5394	3.98032e-08
ENSG00000006534	ALDH3B1	protein_coding	Aldehyde dehydrogenase NAD(P)-dependent	aldehyde dehydrogenase 3 family member B1	ALDEHYDE DEHYDROGENASE 3 FAMILY, MEMBER B1; ALDH3B1;;ALDEHYDE DEHYDROGENASE 7; ALDH7;;ACETALDEHYDE DEHYDROGENASE 7	0.703884	6.45256	61.8278	1.99877e-12
ENSG00000159423	ALDH4A1	protein_coding	Delta-1-pyrroline-5-carboxylate dehydrogenase	aldehyde dehydrogenase 4 family member A1	ALDEHYDE DEHYDROGENASE, FAMILY 4, SUBFAMILY A, MEMBER 1; ALDH4A1;;ALDEHYDE DEHYDROGENASE 4; ALDH4;;PYRROLINE-5-CARBOXYLATE DEHYDROGENASE; P5CDH; P5CD	0.06885	3.51338	0.580401	0.44768
ENSG00000112294	ALDH5A1	protein_coding	Succinate semialdehyde dehydrogenase	aldehyde dehydrogenase 5 family member A1	ALDEHYDE DEHYDROGENASE 5 FAMILY, MEMBER A1; ALDH5A1;;SUCCINIC SEMIALDEHYDE DEHYDROGENASE, NAD(+)-DEPENDENT; SSADH	-1.26529	5.91013	351.719	3.77596e-37
ENSG00000119711	ALDH6A1	protein_coding	Methylmalonate-semialdehyde dehydrogenase	aldehyde dehydrogenase 6 family member A1	ALDEHYDE DEHYDROGENASE 6 FAMILY, MEMBER A1; ALDH6A1;;METHYLMALONATE SEMIALDEHYDE DEHYDROGENASE; MMSDH	0.412361	3.65943	31.0284	1.63379e-07
ENSG00000143149	ALDH9A1	protein_coding	Aldehyde dehydrogenase domain	aldehyde dehydrogenase 9 family member A1	ALDEHYDE DEHYDROGENASE, FAMILY 9, SUBFAMILY A, MEMBER 1; ALDH9A1;;ALDEHYDE DEHYDROGENASE 9; ALDH9;;E3	-0.305288	5.4651	48.9265	1.73573e-10
ENSG00000149925	ALDOA	protein_coding	Fructose-bisphosphate aldolase, class-I	aldolase, fructose-bisphosphate A	ALDOLASE A, FRUCTOSE-BISPHOSPHATE; ALDOA;;FRUCTOSE-1,6-BISPHOSPHATE ALDOLASE A;;ALDOLASE A; ALDA;;ALDOLASE 1;;FRUCTOALDOLASE A	-0.295122	10.9202	18.0025	4.42173e-05
ENSG00000109107	ALDOC	protein_coding	Fructose-bisphosphate aldolase, class-I	aldolase, fructose-bisphosphate C	ALDOLASE C, FRUCTOSE-BISPHOSPHATE; ALDOC;;ALDOLASE 3;;FRUCTOALDOLASE C; ALDC	1.5948	5.05788	100.548	2.29969e-17
ENSG00000033011	ALG1	protein_coding	Glycosyl transferase, family 1	ALG1, chitobiosyldiphosphodolichol beta-mannosyltransferase	ALG1, YEAST, HOMOLOG OF; ALG1;;ASPARAGINE-LINKED GLYCOSYLATION 1 HOMOLOG;;BETA-1,4 MANNOSYLTRANSFERASE;;HMAT1;;HMT1	-1.02697	4.64212	188.684	3.31417e-26
ENSG00000139133	ALG10	protein_coding	Alpha-2-glucosyltransferase Alg10	ALG10, alpha-1,2-glucosyltransferase	ALG10, S. CEREVISIAE, HOMOLOG OF; ALG10;;POTASSIUM CHANNEL REGULATOR 1;;KCR1	0.0483036	3.46998	0.359011	0.550208
ENSG00000175548	ALG10B	protein_coding	Alpha-2-glucosyltransferase Alg10	ALG10B, alpha-1,2-glucosyltransferase		0.293749	4.7629	10.1004	0.00189418
ENSG00000253710	ALG11	protein_coding		ALG11, alpha-1,2-mannosyltransferase	ALG11, S. CEREVISIAE, HOMOLOG OF; ALG11;;ASPARAGINE-LINKED GLYCOSYLATION 11, S. CEREVISIAE, HOMOLOG OF;;KIAA0266	0.093992	3.83672	1.54783	0.21593
ENSG00000182858	ALG12	protein_coding	GPI mannosyltransferase	ALG12, alpha-1,6-mannosyltransferase	ALG12, S. CEREVISIAE, HOMOLOG OF; ALG12;;ASPARAGINE-LINKED GLYCOSYLATION 12, HOMOLOG OF;;DOLICHYL-P-MANNOSE:MAN-7-GlcNAc-2-PP-DOLICHYL-ALPHA-6-MANNOSYLTRANSFERASE	0.0152323	4.99687	0.0405912	0.840677
ENSG00000101901	ALG13	protein_coding	Glycosyl transferase, family 28, C-terminal	ALG13, UDP-N-acetylglucosaminyltransferase subunit		-0.322749	4.07443	25.5066	1.62871e-06
ENSG00000172339	ALG14	protein_coding	Oligosaccharide biosynthesis protein Alg14-like	ALG14, UDP-N-acetylglucosaminyltransferase subunit	ALG14, S. CEREVISIAE, HOMOLOG OF; ALG14;;ASPARAGINE-LINKED GLYCOSYLATION 14, S. CEREVISIAE, HOMOLOG OF	-1.19861	1.54884	78.3512	1.04673e-14
ENSG00000253981	ALG1L13P	transcribed_unprocessed_pseudogene				-0.22312	4.19213	8.11566	0.00518171
ENSG00000119523	ALG2	protein_coding		ALG2, alpha-1,3/1,6-mannosyltransferase	ALG2, S. CEREVISIAE, HOMOLOG OF; ALG2	0.0922921	5.15752	4.21288	0.0423364
ENSG00000214160	ALG3	protein_coding	Glycosyltransferase, ALG3	ALG3, alpha-1,3- mannosyltransferase	ALG3, S. CEREVISIAE, HOMOLOG OF; ALG3;;NOT56-LIKE PROTEIN; NOT56L	-1.16438	6.43367	205.853	1.31923e-27
ENSG00000120697	ALG5	protein_coding	Glycosyltransferase 2-like	ALG5, dolichyl-phosphate beta-glucosyltransferase	ALG5, S. CEREVISIAE, HOMOLOG OF; ALG5;;DOLICHYL PHOSPHATE GLUCOSYLTRANSFERASE	-0.860678	5.33426	203.296	2.10864e-27
ENSG00000088035	ALG6	protein_coding	Glycosyl transferase, ALG6/ALG8	ALG6, alpha-1,3-glucosyltransferase	ALG6, S. CEREVISIAE, HOMOLOG OF; ALG6	-0.00181829	4.02071	0.000488465	0.982405
ENSG00000159063	ALG8	protein_coding	Glycosyl transferase, ALG6/ALG8	ALG8, alpha-1,3-glucosyltransferase	ALG8, S. CEREVISIAE, HOMOLOG OF; ALG8;;DOLICHYL-P-GLUCOSE:Glc-1-Man-9-GlcNAc-2-PP-DOLICHYL-ALPHA-3-GLUCOSYLTRANSFERASE	-0.661405	5.31443	121.159	8.37596e-20
ENSG00000086848	ALG9	protein_coding	GPI mannosyltransferase	ALG9, alpha-1,2-mannosyltransferase	ALG9, S. CEREVISIAE, HOMOLOG OF; ALG9;;DISRUPTED IN BIPOLAR DISORDER 1; DIBD1	-0.191479	2.90437	4.66037	0.0328973
ENSG00000100601	ALKBH1	protein_coding	Alkylated DNA repair protein AlkB	alkB homolog 1, histone H2A dioxygenase	AlkB, E. COLI, HOMOLOG OF, 1; ALKBH1;;ABH1;;ABH	-0.475255	3.11164	41.6351	2.55223e-09
ENSG00000189046	ALKBH2	protein_coding	Oxoglutarate/iron-dependent dioxygenase	alkB homolog 2, alpha-ketoglutarate dependent dioxygenase	AlkB, E. COLI, HOMOLOG OF, 2; ALKBH2;;ABH2	-1.21843	3.48391	180.993	1.49078e-25
ENSG00000166199	ALKBH3	protein_coding	Alkylated DNA repair protein alkB homologue 3	alkB homolog 3, alpha-ketoglutaratedependent dioxygenase	AlkB, E. COLI, HOMOLOG OF, 3; ALKBH3;;PROSTATE CANCER ANTIGEN 1; PCA1;;DEPC1;;ABH3	-0.48595	4.66458	52.1995	5.40807e-11
ENSG00000160993	ALKBH4	protein_coding	Alpha-ketoglutarate-dependent dioxygenase AlkB-like	alkB homolog 4, lysine demethylase	AlkB, E. COLI, HOMOLOG OF, 4; ALKBH4;;ABH4	-0.679914	3.45041	65.8492	5.32322e-13
ENSG00000091542	ALKBH5	protein_coding	RNA demethylase ALKBH5	alkB homolog 5, RNA demethylase	AlkB, E. COLI, HOMOLOG OF, 5; ALKBH5;;ABH5	-0.492638	6.60625	86.064	1.05251e-15
ENSG00000239382	ALKBH6	protein_coding		alkB homolog 6	AlkB, E. COLI, HOMOLOG OF, 6; ALKBH6;;ABH6	2.31686	0.238111	72.6637	6.04935e-14
ENSG00000125652	ALKBH7	protein_coding	Alpha-ketoglutarate-dependent dioxygenase AlkB-like	alkB homolog 7	AlkB, E. COLI, HOMOLOG OF, 7; ALKBH7;;ABH7	0.00925218	4.64537	0.00844901	0.926919
ENSG00000137760	ALKBH8	protein_coding	Oxoglutarate/iron-dependent dioxygenase	alkB homolog 8, tRNA methyltransferase	AlkB, E. COLI, HOMOLOG OF, 8; ALKBH8;;ABH8	-0.818502	3.89175	107.828	2.52952e-18
ENSG00000116127	ALMS1	protein_coding	Alstrom syndrome protein 1	ALMS1, centrosome and basal body associated protein	ALMS1 GENE; ALMS1;;KIAA0328	-0.402158	4.84953	40.8408	3.44791e-09
ENSG00000215067	ALOX12-AS1	antisense				1.63141	0.348924	54.0728	2.80411e-11
ENSG00000012779	ALOX5	protein_coding	Lipoxygenase	arachidonate 5-lipoxygenase	ARACHIDONATE 5-LIPOXYGENASE; ALOX5;;5-@LIPOXYGENASE; LOG5; 5-@LO	2.60072	3.99373	121.788	8.87885e-20
ENSG00000132965	ALOX5AP	protein_coding	Membrane-associated, eicosanoid/glutathione metabolism (MAPEG) protein	arachidonate 5-lipoxygenase activating protein	ARACHIDONATE 5-LIPOXYGENASE-ACTIVATING PROTEIN; ALOX5AP;;FIVE-LIPOXYGENASE-ACTIVATING PROTEIN; FLAP;;5-@LIPOXYGENASE-ACTIVATING PROTEIN	1.36628	7.88761	346.727	7.09512e-37
ENSG00000073331	ALPK1	protein_coding	MHCK/EF2 kinase	alpha kinase 1		1.42081	4.84439	352.446	3.44681e-37
ENSG00000136383	ALPK3	protein_coding	Immunoglobulin subtype 2	alpha kinase 3		2.07229	-1.17489	15.3	0.000153936
ENSG00000003393	ALS2	protein_coding	Dbl homology (DH) domain	ALS2, alsin Rho guanine nucleotide exchange factor	ALSIN;;ALS2 GENE;;KIAA1563	-1.13284	6.79521	366.837	5.82014e-38
ENSG00000183684	ALYREF	protein_coding	RNA recognition motif domain	Aly/REF export factor	ALY/REF EXPORT FACTOR; ALYREF;;TRANSCRIPTIONAL COACTIVATOR ALY; ALY;;REF;;bZIP-ENHANCING FACTOR; BEF;;THO COMPLEX, SUBUNIT 4; THOC4	-0.976117	6.94515	180.32	1.70378e-25
ENSG00000242110	AMACR	protein_coding	CoA-transferase family III	alpha-methylacyl-CoA racemase	ALPHA-METHYLACYL-CoA RACEMASE; AMACR	1.17419	-0.76015	9.98445	0.00200715
ENSG00000110497	AMBRA1	protein_coding	WD40 repeat	autophagy and beclin 1 regulator 1	ACTIVATING MOLECULE IN BECLIN 1-REGULATED AUTOPHAGY; AMBRA1;;DDB1- AND CUL4-ASSOCIATED FACTOR 3; DCAF3;;KIAA1736	-0.133645	5.93639	6.08552	0.0150696
ENSG00000123505	AMD1	protein_coding	S-adenosylmethionine decarboxylase	adenosylmethionine decarboxylase 1	S-ADENOSYLMETHIONINE DECARBOXYLASE; AMD1;;AMD	-0.886402	7.37847	153.786	4.24721e-23
ENSG00000162066	AMDHD2	protein_coding	Amidohydrolase-related	amidohydrolase domain containing 2		-0.334827	3.49134	7.4415	0.00735071
ENSG00000184675	AMER1	protein_coding	Uncharacterised protein family FAM123	APC membrane recruitment protein 1	APC MEMBRANE RECRUITMENT PROTEIN 1; AMER1;;WTX;;FAMILY WITH SEQUENCE SIMILARITY 123, MEMBER B; FAM123B	-1.35014	4.62905	280.129	6.5808e-33
ENSG00000159461	AMFR	protein_coding	Zinc finger, RING-type	autocrine motility factor receptor	AUTOCRINE MOTILITY FACTOR RECEPTOR; AMFR;;GP78	0.393102	7.17175	87.2619	7.42643e-16
ENSG00000104899	AMH	protein_coding	Transforming growth factor-beta, C-terminal	microRNA 4321	ANTI-MULLERIAN HORMONE; AMH;;MULLERIAN-INHIBITING SUBSTANCE; MIS;;MULLERIAN-INHIBITING FACTOR; MIF	1.13283	3.5062	63.5399	1.13372e-12
ENSG00000101935	AMMECR1	protein_coding	AMMECR1 domain	Alport syndrome, mental retardation, midface hypoplasia and elliptocytosis chromosomal region gene 1	AMME CHROMOSOME REGION GENE 1; AMMECR1	-0.546646	4.54322	59.0926	5.00379e-12
ENSG00000144233	AMMECR1L	protein_coding	AMMECR1 domain	AMMECR1 like		-0.600855	5.82623	241.016	2.96898e-30
ENSG00000166126	AMN	protein_coding	Amnionless	amnion associated transmembrane protein	AMNIONLESS, MOUSE, HOMOLOG OF; AMN	-0.722763	1.58774	19.9197	1.86205e-05
ENSG00000151743	AMN1	protein_coding	Leucine-rich repeat	antagonist of mitotic exit network 1 homolog		0.481034	1.96488	13.8544	0.000304495
ENSG00000166025	AMOTL1	protein_coding		angiomotin like 1	ANGIOMOTIN-LIKE 1; AMOTL1;;JUNCTION-ENRICHED AND -ASSOCIATED PROTEIN; JEAP	-0.52693	5.63793	71.9845	7.48613e-14
ENSG00000116337	AMPD2	protein_coding	AMP deaminase	adenosine monophosphate deaminase 2	ADENOSINE MONOPHOSPHATE DEAMINASE 2; AMPD2	0.124415	6.47394	2.95199	0.0884023
ENSG00000133805	AMPD3	protein_coding	AMP deaminase	adenosine monophosphate deaminase 3	ADENOSINE MONOPHOSPHATE DEAMINASE 3; AMPD3	0.51489	4.66962	66.3835	4.47521e-13
ENSG00000240038	AMY2B	protein_coding	Alpha amylase	amylase, alpha 2B (pancreatic)	AMYLASE, PANCREATIC, B; AMY2B	1.45851	0.628194	28.226	5.18272e-07
ENSG00000196704	AMZ2	protein_coding	Peptidase M54, archaemetzincin	archaelysin family metallopeptidase 2	ARCHAELYSIN FAMILY METALLOPEPTIDASE 2; AMZ2;;ARCHAEMETZINCIN 2	-0.062166	4.69855	1.07118	0.302801
ENSG00000214174	AMZ2P1	transcribed_unprocessed_pseudogene				0.934724	1.99369	80.9266	4.81167e-15
ENSG00000153107	ANAPC1	protein_coding	Anaphase-promoting complex subunit 1	anaphase promoting complex subunit 1	ANAPHASE-PROMOTING COMPLEX, SUBUNIT 1; ANAPC1;;APC1	-1.22344	6.80604	408.518	4.47784e-40
ENSG00000164162	ANAPC10	protein_coding	APC10/DOC domain	anaphase promoting complex subunit 10		-0.521123	3.63852	38.9403	7.12899e-09
ENSG00000141552	ANAPC11	protein_coding	Zinc finger, RING-type	anaphase promoting complex subunit 11	ANAPHASE-PROMOTING COMPLEX SUBUNIT 11; ANAPC11;;APC11	-0.160034	5.29695	4.78537	0.0306799
ENSG00000129055	ANAPC13	protein_coding	Apc13p	anaphase promoting complex subunit 13	ANAPHASE-PROMOTING COMPLEX, SUBUNIT 13; ANAPC13;;APC13;;SWM1, S. CEREVISIAE, HOMOLOG OF; SWM1	-0.616907	5.01879	81.9598	3.53313e-15
ENSG00000110200	ANAPC15	protein_coding		anaphase promoting complex subunit 15	ANAPHASE-PROMOTING COMPLEX, SUBUNIT 15; ANAPC15;;APC15	-0.524265	4.14104	43.6193	1.21237e-09
ENSG00000166295	ANAPC16	protein_coding	Anaphase-promoting complex subunit 16	anaphase promoting complex subunit 16	ANAPHASE-PROMOTING COMPLEX, SUBUNIT 16; ANAPC16;;METABOLIC SYNDROME-ASSOCIATED GENE; MSAG;;CHROMOSOME 10 OPEN READING FRAME 104; C10ORF104	0.420324	6.37701	59.9308	3.77122e-12
ENSG00000176248	ANAPC2	protein_coding	Cullin, N-terminal	anaphase promoting complex subunit 2	ANAPHASE-PROMOTING COMPLEX, SUBUNIT 2; ANAPC2;;APC2;;KIAA1406	0.198066	5.74169	5.48745	0.0208334
ENSG00000053900	ANAPC4	protein_coding	WD40/YVTN repeat-like-containing domain	anaphase promoting complex subunit 4	ANAPHASE-PROMOTING COMPLEX, SUBUNIT 4; ANAPC4;;APC4	-0.183152	5.22965	10.1864	0.00181458
ENSG00000089053	ANAPC5	protein_coding	Tetratricopeptide-like helical domain	anaphase promoting complex subunit 5	ANAPHASE-PROMOTING COMPLEX, SUBUNIT 5; ANAPC5;;APC5	-0.808369	7.82106	351.232	4.01456e-37
ENSG00000196510	ANAPC7	protein_coding	Tetratricopeptide-like helical domain	anaphase promoting complex subunit 7	ANAPHASE-PROMOTING COMPLEX, SUBUNIT 7; ANAPC7;;APC7	-0.523415	5.45486	126.907	2.04483e-20
ENSG00000013523	ANGEL1	protein_coding	Endonuclease/exonuclease/phosphatase	angel homolog 1		-0.40533	4.49635	58.4806	6.15678e-12
ENSG00000174606	ANGEL2	protein_coding	Endonuclease/exonuclease/phosphatase	angel homolog 2		-0.31299	5.18438	24.206	2.842e-06
ENSG00000130812	ANGPTL6	protein_coding	Fibrinogen, alpha/beta/gamma chain, C-terminal globular domain	angiopoietin like 6	ANGIOPOIETIN-LIKE 6; ANGPTL6;;ANGIOPOIETIN-RELATED GROWTH FACTOR; AGF	0.196154	2.69478	2.17255	0.143164
ENSG00000029534	ANK1	protein_coding	Death domain	ankyrin 1		0.819221	-0.808099	3.8416	0.0523599
ENSG00000145362	ANK2	protein_coding	Ankyrin-B	ankyrin 2	ANKYRIN 2; ANK2;;ANKYRIN, NONERYTHROID;;ANKYRIN, BRAIN;;ANKYRIN, NEURONAL;;ANKYRIN-B	-0.630686	3.16665	28.1661	5.31373e-07
ENSG00000151687	ANKAR	protein_coding	Armadillo	ankyrin and armadillo repeat containing	ANKYRIN AND ARMADILLO REPEATS-CONTAINING PROTEIN; ANKAR;;FLJ25415	0.416098	0.710444	5.46461	0.0210948
ENSG00000166839	ANKDD1A	protein_coding	Death domain	ankyrin repeat and death domain containing 1A		1.39744	0.421626	49.3328	1.49986e-10
ENSG00000132623	ANKEF1	protein_coding	EF-hand domain	ankyrin repeat and EF-hand domain containing 1		-0.822821	-0.840735	3.19221	0.0767785
ENSG00000185722	ANKFY1	protein_coding	BTB/POZ domain	ankyrin repeat and FYVE domain containing 1	ANKYRIN REPEATS- AND FYVE DOMAIN-CONTAINING PROTEIN 1; ANKFY1;;ANKYRIN REPEATS HOOKED TO A ZINC FINGER MOTIF; ANKHZN;;KIAA1255	0.106212	5.89538	6.94118	0.00955686
ENSG00000154122	ANKH	protein_coding	Progressive ankylosis	ANKH inorganic pyrophosphate transport regulator	ANK, MOUSE, HOMOLOG OF; ANKH;;HANK	-0.496786	4.2397	64.6223	7.9446e-13
ENSG00000131503	ANKHD1	protein_coding	Ankyrin repeat	ankyrin repeat and KH domain containing 1	ANKYRIN REPEAT AND KH DOMAIN-CONTAINING PROTEIN 1; ANKHD1;;MULTIPLE ANKYRIN REPEATS, SINGLE KH-DOMAIN, DROSOPHILA, HOMOLOG OF;MASK;;KIAA1085MASK-BP3, INCLUDED;;VPR-BINDING ANKYRIN REPEAT PROTEIN, INCLUDED; VBARP, INCLUDED	0.431101	0.815224	6.77287	0.0104454
ENSG00000001629	ANKIB1	protein_coding	Zinc finger, RING-type	ankyrin repeat and IBR domain containing 1		0.224531	5.63226	14.642	0.000209693
ENSG00000160117	ANKLE1	protein_coding	Ankyrin repeat	ankyrin repeat and LEM domain containing 1		-0.829543	4.86177	90.5331	2.8958e-16
ENSG00000176915	ANKLE2	protein_coding	LEM domain	ankyrin repeat and LEM domain containing 2	ANKYRIN REPEAT- AND LEM DOMAIN-CONTAINING PROTEIN 2; ANKLE2;;LEM DOMAIN-CONTAINING PROTEIN 4; LEM4;;KIAA0692	0.00104971	7.07598	0.00125016	0.971855
ENSG00000144504	ANKMY1	protein_coding	Ankyrin repeat	ankyrin repeat and MYND domain containing 1		0.313445	3.95682	11.7406	0.000843039
ENSG00000106524	ANKMY2	protein_coding	Ankyrin repeat	ankyrin repeat and MYND domain containing 2		-0.0540692	4.94778	0.915044	0.340741
ENSG00000164331	ANKRA2	protein_coding	Ankyrin repeat	ankyrin repeat family A member 2	ANKYRIN REPEAT-CONTAINING PROTEIN, FAMILY A, MEMBER 2; ANKRA2;;ANKRA;;RFXANK-LIKE PROTEIN	0.755443	2.86706	74.1285	3.83062e-14
ENSG00000088448	ANKRD10	protein_coding	Ankyrin repeat	ankyrin repeat domain 10		0.714542	6.12034	199.261	4.45417e-27
ENSG00000229152	ANKRD10-IT1	sense_intronic				1.25624	2.38322	54.6778	2.27185e-11
ENSG00000167522	ANKRD11	protein_coding	Ankyrin repeat	ankyrin repeat domain 11		0.662115	6.42954	64.2539	8.96444e-13
ENSG00000101745	ANKRD12	protein_coding		ankyrin repeat domain 12	ANKYRIN REPEAT DOMAIN-CONTAINING PROTEIN 12; ANKRD12;;ANKYRIN REPEAT-CONTAINING COFACTOR 2; ANCO2;;KIAA0874	1.23468	6.81668	209.18	7.20529e-28
ENSG00000076513	ANKRD13A	protein_coding	Ankyrin repeat domain-containing protein 13	ankyrin repeat domain 13A	ANKYRIN REPEAT DOMAIN-CONTAINING PROTEIN 13A; ANKRD13A	0.308466	7.16905	69.2906	1.75691e-13
ENSG00000198720	ANKRD13B	protein_coding	Ankyrin repeat domain-containing protein 13	ankyrin repeat domain 13B	ANKYRIN REPEAT DOMAIN-CONTAINING PROTEIN 13B; ANKRD13B	-1.72567	3.41891	266.625	5.05637e-32
ENSG00000118454	ANKRD13C	protein_coding	Ankyrin repeat	ankyrin repeat domain 13C	ANKYRIN REPEAT DOMAIN-CONTAINING PROTEIN 13C; ANKRD13C	0.21498	4.94462	15.1798	0.000162854
ENSG00000172932	ANKRD13D	protein_coding	Ubiquitin interacting motif	ankyrin repeat domain 13D	ANKYRIN REPEAT DOMAIN-CONTAINING PROTEIN 13D; ANKRD13D	1.65894	7.2829	240.383	4.4655e-30
ENSG00000134461	ANKRD16	protein_coding	Ankyrin repeat	ankyrin repeat domain 16		-1.75353	1.25411	165.624	3.39488e-24
ENSG00000132466	ANKRD17	protein_coding	Ankyrin repeat	ankyrin repeat domain 17	ANKYRIN REPEAT DOMAIN-CONTAINING PROTEIN 17; ANKRD17;;GTAR	-0.353218	8.14859	74.8347	3.07714e-14
ENSG00000180071	ANKRD18A	protein_coding	Protein of unknown function DUF3496	ankyrin repeat domain 18A		0.213608	2.33661	3.00373	0.0856931
ENSG00000226435	ANKRD18DP	transcribed_unprocessed_pseudogene				0.751726	-0.163709	8.90853	0.00345297
ENSG00000152766	ANKRD22	protein_coding	Ankyrin repeat	ankyrin repeat domain 22		1.26953	4.68452	85.8335	1.28836e-15
ENSG00000089847	ANKRD24	protein_coding	Ankyrin repeat	ankyrin repeat domain 24		2.39545	0.309825	81.9368	3.55739e-15
ENSG00000107890	ANKRD26	protein_coding	Protein of unknown function DUF3496	ankyrin repeat domain 26	ANKYRIN REPEAT DOMAIN-CONTAINING PROTEIN 26; ANKRD26;;KIAA1074	0.0957342	3.87742	1.65382	0.200965
ENSG00000105186	ANKRD27	protein_coding	Ankyrin repeat	ankyrin repeat domain 27		-1.30916	7.21269	1004.45	1.87058e-59
ENSG00000206560	ANKRD28	protein_coding	Ankyrin repeat	ankyrin repeat domain 28	ANKYRIN REPEAT DOMAIN-CONTAINING PROTEIN 28; ANKRD28;;PHOSPHATASE INTERACTOR TARGETING K PROTEIN; PITK;;KIAA0379	-0.776807	5.95536	142.395	5.37673e-22
ENSG00000164236	ANKRD33B	protein_coding	Ankyrin repeat-containing domain	ankyrin repeat domain 33B		0.196889	6.44085	13.3235	0.00039228
ENSG00000272031	ANKRD34A	protein_coding	Ankyrin repeat	ankyrin repeat domain 34A		-0.733459	1.95735	32.2842	9.81733e-08
ENSG00000198483	ANKRD35	protein_coding	Ankyrin repeat	ankyrin repeat domain 35		0.753667	2.54235	65.0583	6.88871e-13
ENSG00000135976	ANKRD36	protein_coding	Ankyrin repeat	ankyrin repeat domain 36		0.807414	2.38311	34.0139	4.90556e-08
ENSG00000196912	ANKRD36B	protein_coding	Ankyrin repeat	ankyrin repeat domain 36B		0.502828	2.00998	15.0091	0.00017643
ENSG00000174501	ANKRD36C	protein_coding	Ankyrin repeat			0.862905	2.37897	25.1491	1.89691e-06
ENSG00000186352	ANKRD37	protein_coding	Ankyrin repeat-containing domain	ankyrin repeat domain 37		0.252075	1.66774	2.80158	0.096828
ENSG00000213337	ANKRD39	protein_coding	Ankyrin repeat	ankyrin repeat domain 39		-0.463871	1.77543	13.626	0.000339493
ENSG00000154945	ANKRD40	protein_coding	Ankyrin repeat	ankyrin repeat domain 40		-0.643889	5.705	271.507	2.39945e-32
ENSG00000137494	ANKRD42	protein_coding	Ankyrin repeat	ankyrin repeat domain 42		-0.159394	2.44244	2.79148	0.0974246
ENSG00000065413	ANKRD44	protein_coding	Ankyrin repeat	ankyrin repeat domain 44		1.22983	2.52664	103.185	8.69977e-18
ENSG00000186106	ANKRD46	protein_coding	Ankyrin repeat	ankyrin repeat domain 46		-0.223033	4.63555	9.00531	0.00328728
ENSG00000168876	ANKRD49	protein_coding	Ankyrin repeat	ankyrin repeat domain 49		0.383443	4.2552	26.8392	9.26387e-07
ENSG00000151458	ANKRD50	protein_coding	Ankyrin repeat	ankyrin repeat domain 50		0.147165	4.13285	2.47807	0.118129
ENSG00000139645	ANKRD52	protein_coding	Ankyrin repeat	ankyrin repeat domain 52		0.00113865	6.8118	0.00051419	0.981947
ENSG00000100124	ANKRD54	protein_coding	Ankyrin repeat	microRNA 658	ANKYRIN REPEAT DOMAIN-CONTAINING PROTEIN 54; ANKRD54;;LYN-INTERACTING ANKYRIN REPEAT PROTEIN; LIAR	-0.441067	3.62451	28.3409	4.94068e-07
ENSG00000164512	ANKRD55	protein_coding	Ankyrin repeat	ankyrin repeat domain 55	ANKYRIN REPEAT DOMAIN-CONTAINING PROTEIN 55; ANKRD55	-0.613915	2.05625	10.6982	0.00140722
ENSG00000230778	ANKRD63	protein_coding	Ankyrin repeat	ankyrin repeat domain 63		-0.429829	0.561215	4.85058	0.0295864
ENSG00000156381	ANKRD9	protein_coding		ankyrin repeat domain 9		0.816153	3.50639	50.3182	1.05405e-10
ENSG00000064999	ANKS1A	protein_coding	Sterile alpha motif domain	ankyrin repeat and sterile alpha motif domain containing 1A	ANKYRIN REPEAT AND STERILE ALPHA MOTIF DOMAINS-CONTAINING PROTEIN1A; ANKS1A;;ODIN;;KIAA0229	-0.36605	5.84562	48.8094	1.8105e-10
ENSG00000168096	ANKS3	protein_coding	Sterile alpha motif domain	ankyrin repeat and sterile alpha motif domain containing 3		-0.505064	2.40771	20.1648	1.669e-05
ENSG00000165138	ANKS6	protein_coding	Sterile alpha motif domain	ankyrin repeat and sterile alpha motif domain containing 6	ANKYRIN REPEAT AND STERILE ALPHA MOTIF DOMAINS-CONTAINING PROTEIN6; ANKS6;;PKDR1;;SAMCYSTIN	-0.498753	3.53697	33.097	7.07839e-08
ENSG00000163516	ANKZF1	protein_coding	Ankyrin repeat	ankyrin repeat and zinc finger domain containing 1		0.0796679	5.48911	1.00322	0.318588
ENSG00000011426	ANLN	protein_coding	Pleckstrin homology domain	anillin actin binding protein	ACTIN-BINDING PROTEIN ANILLIN; ANLN	0.60072	6.95902	70.341	1.25788e-13
ENSG00000160746	ANO10	protein_coding	Anoctamin	anoctamin 10	ANOCTAMIN 10; ANO10;;TRANSMEMBRANE PROTEIN 16K; TMEM16K	1.20932	3.84178	252.224	4.82338e-31
ENSG00000177119	ANO6	protein_coding	Anoctamin	anoctamin 6		0.391976	7.24299	77.0218	1.56982e-14
ENSG00000146205	ANO7	protein_coding	Anoctamin	anoctamin 7	ANOCTAMIN 7; ANO7;;TRANSMEMBRANE PROTEIN 16G; TMEM16G;;PROSTATE CANCER-ASSOCIATED PROTEIN 5; PCANAP5;;IPCA5;;DRESDEN TRANSMEMBRANE PROTEIN OF PROSTATE; DTMPP;;NOVEL GENE EXPRESSED IN PROSTATE; NGEP	-1.03619	2.34422	26.9208	9.01464e-07
ENSG00000074855	ANO8	protein_coding	Anoctamin	anoctamin 8	ANOCTAMIN 8; ANO8;;TRANSMEMBRANE PROTEIN 16H; TMEM16H;;KIAA1623	1.85901	3.6634	190.826	2.1952e-26
ENSG00000185101	ANO9	protein_coding	Anoctamin	anoctamin 9		1.5085	-0.326071	29.0905	4.44588e-07
ENSG00000140350	ANP32A	protein_coding	Leucine-rich repeat	acidic nuclear phosphoprotein 32 family member A	ACIDIC LEUCINE-RICH NUCLEAR PHOSPHOPROTEIN 32 FAMILY, MEMBER A; ANP32A;;PUTATIVE HUMAN HLA CLASS II-ASSOCIATED PROTEIN; PHAP1;;PHAP I;;LEUCINE-RICH ACIDIC NUCLEAR PROTEIN; LANP	-0.720839	8.1505	299.506	3.97208e-34
ENSG00000136938	ANP32B	protein_coding	Leucine-rich repeat	acidic nuclear phosphoprotein 32 family member B		-0.370289	8.67483	75.8573	2.24422e-14
ENSG00000259461	ANP32BP3	processed_pseudogene				-0.266477	3.47383	7.82788	0.00601263
ENSG00000139223	ANP32D	protein_coding	Leucine-rich repeat	acidic nuclear phosphoprotein 32 family member D	ACIDIC LEUCINE-RICH NUCLEAR PHOSPHOPROTEIN 32 FAMILY, MEMBER D; ANP32D;;PP32R2	-0.0284708	-0.33885	0.0116402	0.914267
ENSG00000143401	ANP32E	protein_coding	Leucine-rich repeat	acidic nuclear phosphoprotein 32 family member E	ACIDIC LEUCINE-RICH NUCLEAR PHOSPHOPROTEIN 32 FAMILY, MEMBER E; ANP32E;;LEUCINE-RICH ACIDIC NUCLEAR PROTEIN-LIKE; LANPL	-0.822435	8.38134	110.191	1.36244e-18
ENSG00000166825	ANPEP	protein_coding	Peptidase M1, alanine aminopeptidase/leukotriene A4 hydrolase	alanyl aminopeptidase, membrane	ALANYL AMINOPEPTIDASE; ANPEP;;AMINOPEPTIDASE N; PEPN;;CD13 ANTIGEN; CD13;;LEUKOCYTE SURFACE ANTIGEN GP150; GP150	1.04508	7.37918	107.639	2.84068e-18
ENSG00000169604	ANTXR1	protein_coding	von Willebrand factor, type A	anthrax toxin receptor 1	ANTHRAX TOXIN RECEPTOR 1; ANTXR1;;TUMOR ENDOTHELIAL MARKER 8; TEM8;;ANTHRAX TOXIN RECEPTOR; ATR	-1.27946	2.82505	186.038	5.53577e-26
ENSG00000163297	ANTXR2	protein_coding	von Willebrand factor, type A	anthrax toxin receptor 2	ANTHRAX TOXIN RECEPTOR 2; ANTXR2;;CAPILLARY MORPHOGENESIS GENE 2; CMG2	0.835734	7.31405	84.6223	1.60593e-15
ENSG00000274209	ANTXRL	protein_coding	von Willebrand factor, type A	anthrax toxin receptor-like		0.803974	-1.24217	1.3049	0.255831
ENSG00000135046	ANXA1	protein_coding	Annexin	annexin A1	ANNEXIN A1; ANXA1;;ANNEXIN I; ANX1;;LIPOCORTIN I; LPC1;;CALPACTIN II	0.596222	6.62527	54.2559	2.6308e-11
ENSG00000122359	ANXA11	protein_coding	Annexin	annexin A11	ANNEXIN A11; ANXA11;;ANNEXIN XI; ANX11;;AUTOANTIGEN, 56-KD	0.357977	7.6369	58.8519	5.42847e-12
ENSG00000177721	ANXA2R	protein_coding	Annexin-2 receptor	annexin A2 receptor	CHROMOSOME 5 OPEN READING FRAME 39; C5ORF39;;ANNEXIN II RECEPTOR; AX2R;;AXIIR	1.72995	0.843038	78.4066	1.02925e-14
ENSG00000138772	ANXA3	protein_coding	Annexin	annexin A3	ANNEXIN A3; ANXA3;;ANNEXIN III; ANX3;;LIPOCORTIN III	0.844179	2.35888	30.3806	2.12873e-07
ENSG00000196975	ANXA4	protein_coding	Annexin	annexin A4	ANNEXIN A4; ANXA4;;ANNEXIN IV; ANX4;;PLACENTAL ANTICOAGULANT PROTEIN II;;ZYMOGEN GRANULE MEMBRANE-ASSOCIATED PROTEIN, 36-KD; ZAP36	0.395078	5.07505	53.7818	3.10382e-11
ENSG00000164111	ANXA5	protein_coding	Annexin	annexin A5	ANNEXIN A5; ANXA5;;ANNEXIN V; ANX5;;ENDONEXIN II; ENX2;;PLACENTAL ANTICOAGULANT PROTEIN I;;VASCULAR ANTICOAGULANT-ALPHA;;LIPOCORTIN V;;PLACENTAL PROTEIN 4; PP4;;ANCHORIN CII	0.801853	8.22371	288.983	1.79452e-33
ENSG00000197043	ANXA6	protein_coding	Annexin	annexin A6	ANNEXIN A6; ANXA6;;ANNEXIN VI; ANX6;;CALCIUM-BINDING PROTEIN p68;;CALELECTRIN	0.877535	7.79538	225.687	3.91935e-29
ENSG00000138279	ANXA7	protein_coding	Annexin	annexin A7	ANNEXIN A7; ANXA7;;ANNEXIN VII; ANX7;;SYNEXIN; SNX	-0.133532	6.41031	11.0059	0.00120881
ENSG00000143412	ANXA9	protein_coding	Annexin	annexin A9	ANNEXIN A9; ANXA9;;ANNEXIN 31, FORMERLY; ANX31, FORMERLY	-0.615825	0.198069	10.2179	0.0017863
ENSG00000136250	AOAH	protein_coding	GDSL lipase/esterase	acyloxyacyl hydrolase	ACYLOXYACYL HYDROLASE; AOAH	1.7601	4.46936	176.6	3.58149e-25
ENSG00000002726	AOC1	protein_coding	Copper amine oxidase	amine oxidase, copper containing 1	AMILORIDE-BINDING PROTEIN 1; ABP1;;ABP;;DIAMINE OXIDASE; DAO;;DAO1	2.58539	0.545394	36.6809	1.71214e-08
ENSG00000131480	AOC2	protein_coding	Copper amine oxidase	amine oxidase, copper containing 2	AMINE OXIDASE, COPPER-CONTAINING, 2; AOC2;;RETINA-SPECIFIC AMINE OXIDASE; RAO	0.289762	-0.30794	1.00618	0.317878
ENSG00000273271	AP000254.8	antisense				-0.135135	0.479796	0.550138	0.459739
ENSG00000272578	AP000347.2	transcribed_unprocessed_pseudogene				1.13544	-0.280199	12.5746	0.000562324
ENSG00000273295	AP000350.5	lincRNA				1.49228	-0.0641277	22.5491	5.82835e-06
ENSG00000280594	AP000432.1	processed_transcript				0.796602	-0.542774	10.5286	0.0015306
ENSG00000184441	AP001062.7	antisense				0.347042	3.21833	11.5525	0.000924194
ENSG00000224905	AP001347.6	antisense				-0.77762	-0.765363	7.16139	0.00851149
ENSG00000212712	AP002414.1	processed_pseudogene				0.611751	-0.915695	2.5632	0.112058
ENSG00000255173	AP003068.12	antisense				2.63619	-0.561062	39.0562	6.8181e-09
ENSG00000255284	AP006621.5	lincRNA				1.72851	0.179343	40.8875	3.38725e-09
ENSG00000255142	AP006621.6	lincRNA				2.25169	-1.19022	15.3467	0.000152514
ENSG00000138660	AP1AR	protein_coding	AP-1 complex-associated regulatory protein	adaptor related protein complex 1 associated regulatory protein	CHROMOSOME 4 OPEN READING FRAME 16; C4ORF16;;GAMMA-1 ADAPTIN BREFELDIN-A RESISTANCE PROTEIN; GBAR;;2C18	-0.574643	5.57017	85.4497	1.25967e-15
ENSG00000100280	AP1B1	protein_coding	Armadillo	adaptor related protein complex 1 beta 1 subunit	ADAPTOR-RELATED PROTEIN COMPLEX 1, BETA-1 SUBUNIT; AP1B1;;ADAPTIN, BETA-1; ADTB1;;ADAPTIN, BETA-PRIME;;BETA-ADAPTIN-MENINGIOMA GENE ON CHROMOSOME 22; BAM22	-0.0381202	7.44726	0.30784	0.580062
ENSG00000166747	AP1G1	protein_coding	Clathrin/coatomer adaptor, adaptin-like, N-terminal	adaptor related protein complex 1 gamma 1 subunit	ADAPTOR-RELATED PROTEIN COMPLEX 1, GAMMA-1 SUBUNIT; AP1G1;;ADAPTIN, GAMMA; ADTG;;CLATHRIN-ASSOCIATED/ASSEMBLY/ADAPTOR PROTEIN, LARGE, GAMMA-1; CLAPG1	0.212734	7.6771	18.0528	4.32167e-05
ENSG00000213983	AP1G2	protein_coding	Clathrin/coatomer adaptor, adaptin-like, N-terminal	adaptor related protein complex 1 gamma 2 subunit	ADAPTOR-RELATED PROTEIN COMPLEX 1, GAMMA-2 SUBUNIT; AP1G2;;ADAPTIN, GAMMA-2;;CLATHRIN-ASSOCIATED/ASSEMBLY/ADAPTOR PROTEIN, LARGE, GAMMA-2	1.26818	6.49058	228.021	2.62657e-29
ENSG00000072958	AP1M1	protein_coding	Clathrin adaptor, mu subunit	adaptor related protein complex 1 mu 1 subunit	ADAPTOR-RELATED PROTEIN COMPLEX 1, MU-1 SUBUNIT; AP1M1;;CLATHRIN ASSEMBLY PROTEIN COMPLEX AP1, MU SUBUNIT;;CLATHRIN ADAPTOR PROTEIN AP47; AP47;;MU-1A	0.143345	6.85706	5.07239	0.0261646
ENSG00000106367	AP1S1	protein_coding	Clathrin adaptor complex, small chain	adaptor related protein complex 1 sigma 1 subunit	ADAPTOR-RELATED PROTEIN COMPLEX 1, SIGMA-1 SUBUNIT; AP1S1;;CLATHRIN-ASSOCIATED/ASSEMBLY/ADAPTOR PROTEIN, SMALL 1; CLAPS1;;CLATHRIN ADAPTOR PROTEIN 19; AP19;;CLATHRIN ADAPTOR COMPLEX AP1, SIGMA-1A SUBUNIT	-0.390751	6.33397	61.8895	1.9581e-12
ENSG00000182287	AP1S2	protein_coding	Clathrin adaptor complex, small chain	adaptor related protein complex 1 sigma 2 subunit	ADAPTOR-RELATED PROTEIN COMPLEX 1, SIGMA-2 SUBUNIT; AP1S2;;CLATHRIN-ASSOCIATED/ASSEMBLY/ADAPTOR PROTEIN, SMALL 1-LIKE;;CLATHRIN ADAPTOR COMPLEX AP1, SIGMA-1B SUBUNIT	1.81643	6.41839	323.268	1.51082e-35
ENSG00000152056	AP1S3	protein_coding	Clathrin adaptor complex, small chain	adaptor related protein complex 1 sigma 3 subunit	ADAPTOR-RELATED PROTEIN COMPLEX 1, SIGMA-3 SUBUNIT; AP1S3;;ADAPTOR PROTEIN COMPLEX 1, SIGMA-1C SUBUNIT	-0.272608	-1.27061	0.578619	0.448376
ENSG00000196961	AP2A1	protein_coding	Clathrin/coatomer adaptor, adaptin-like, N-terminal	adaptor related protein complex 2 alpha 1 subunit	ADAPTOR-RELATED PROTEIN COMPLEX 2, ALPHA-1 SUBUNIT; AP2A1;;CLATHRIN-ASSOCIATED/ASSEMBLY/ADAPTOR PROTEIN, LARGE, ALPHA-1; CLAPA1;;CLATHRIN ADAPTOR COMPLEX AP2, ALPHA SUBUNIT;;AP2-ALPHA;;ADAPTIN, ALPHA	0.16436	7.22523	4.83216	0.029891
ENSG00000183020	AP2A2	protein_coding	Clathrin/coatomer adaptor, adaptin-like, N-terminal	adaptor related protein complex 2 alpha 2 subunit	ADAPTOR-RELATED PROTEIN COMPLEX 2, ALPHA-2 SUBUNIT; AP2A2;;KIAA0899	0.214372	5.70404	12.4182	0.000606489
ENSG00000006125	AP2B1	protein_coding	Clathrin/coatomer adaptor, adaptin-like, N-terminal	adaptor related protein complex 2 beta 1 subunit		-0.465494	7.98565	190.056	2.54457e-26
ENSG00000161203	AP2M1	protein_coding	Clathrin adaptor, mu subunit	adaptor related protein complex 2 mu 1 subunit	ADAPTOR-RELATED PROTEIN COMPLEX 2, MU-1 SUBUNIT; AP2M1;;CLATHRIN-ASSOCIATED/ASSEMBLY/ADAPTOR PROTEIN, MEDIUM 1; CLAPM1;;CLATHRIN ADAPTOR PROTEIN 50; AP50;;CLATHRIN ADAPTOR COMPLEX AP2, MU SUBUNIT;;MU-2	-0.209396	8.33016	28.4542	4.71328e-07
ENSG00000042753	AP2S1	protein_coding	Clathrin adaptor complex, small chain	adaptor related protein complex 2 sigma 1 subunit	ADAPTOR-RELATED PROTEIN COMPLEX 2, SIGMA-1 SUBUNIT; AP2S1;;CLATHRIN-ASSOCIATED/ASSEMBLY/ADAPTOR PROTEIN, SMALL 2, 17-KD; CLAPS2;;CLATHRIN ADAPTOR PROTEIN AP17; AP17;;CLATHRIN ADAPTOR COMPLEX AP2, SIGMA SUBUNIT	-0.480729	6.2327	56.9426	1.0402e-11
ENSG00000132842	AP3B1	protein_coding	Clathrin/coatomer adaptor, adaptin-like, N-terminal	adaptor related protein complex 3 beta 1 subunit	ADAPTOR-RELATED PROTEIN COMPLEX 3, BETA-1 SUBUNIT; AP3B1;;ADAPTIN, BETA-3A; ADTB3A;;HPS2 GENE; HPS2;;PEARL, MOUSE, HOMOLOG OF; PE	0.107094	6.1409	3.94493	0.0493376
ENSG00000103723	AP3B2	protein_coding	Clathrin/coatomer adaptor, adaptin-like, N-terminal	adaptor related protein complex 3 beta 2 subunit	ADAPTOR-RELATED PROTEIN COMPLEX 3, BETA-2 SUBUNIT; AP3B2;;ADAPTOR-RELATED PROTEIN COMPLEX 3B, NEURON-SPECIFIC, BETA-3B;;AP3B, BETA-3B;;NEURONAL ADAPTIN-LIKE PROTEIN, BETA SUBUNIT; NAPTB	2.06754	0.212137	40.2432	4.32811e-09
ENSG00000065000	AP3D1	protein_coding	Clathrin/coatomer adaptor, adaptin-like, N-terminal	adaptor related protein complex 3 delta 1 subunit	ADAPTOR-RELATED PROTEIN COMPLEX 3, DELTA-1 SUBUNIT; AP3D1;;ADAPTIN, DELTA;;GARNET, DROSOPHILA, HOMOLOG OF;;MOCHA, MOUSE, HOMOLOG OF	0.147996	7.75266	4.83991	0.0297624
ENSG00000185009	AP3M1	protein_coding	Clathrin adaptor, mu subunit	adaptor related protein complex 3 mu 1 subunit	ADAPTOR-RELATED PROTEIN COMPLEX 3, MU-1 SUBUNIT; AP3M1;;CLATHRIN ADAPTOR COMPLEX AP3, MU-3A SUBUNIT	0.0997919	7.23115	3.45375	0.0656076
ENSG00000070718	AP3M2	protein_coding	Clathrin adaptor, mu subunit	adaptor related protein complex 3 mu 2 subunit	ADAPTOR-RELATED PROTEIN COMPLEX 3, MU-2 SUBUNIT; AP3M2;;CLATHRIN ADAPTOR COMPLEX AP3, MU-3B SUBUNIT;;CLA20	0.163347	3.63661	5.00344	0.0271812
ENSG00000177879	AP3S1	protein_coding	Clathrin adaptor complex, small chain	adaptor related protein complex 3 sigma 1 subunit	ADAPTOR-RELATED PROTEIN COMPLEX 3, SIGMA-1 SUBUNIT; AP3S1;;CLATHRIN-ASSOCIATED/ASSEMBLY/ADAPTOR PROTEIN, SMALL 3, 22-KD; CLAPS3;;CLATHRIN ADAPTOR COMPLEX AP3, SIGMA-3A SUBUNIT	-0.15345	5.32659	5.23165	0.0239667
ENSG00000157823	AP3S2	protein_coding	Clathrin adaptor complex, small chain	adaptor related protein complex 3 sigma 2 subunit	ADAPTOR-RELATED PROTEIN COMPLEX 3, SIGMA-2 SUBUNIT; AP3S2;;CLATHRIN-ASSOCIATED/ASSEMBLY/ADAPTOR PROTEIN, SMALL 4, 22-KD;;CLATHRIN ADAPTOR COMPLEX AP3, SIGMA-3B SUBUNIT	0.123084	3.49932	3.09883	0.0809469
ENSG00000134262	AP4B1	protein_coding	Clathrin/coatomer adaptor, adaptin-like, N-terminal	adaptor related protein complex 4 beta 1 subunit	ADAPTOR-RELATED PROTEIN COMPLEX 4, BETA-1 SUBUNIT; AP4B1	0.405514	4.76943	53.704	3.18926e-11
ENSG00000081014	AP4E1	protein_coding	Clathrin/coatomer adaptor, adaptin-like, N-terminal	adaptor related protein complex 4 epsilon 1 subunit	ADAPTOR-RELATED PROTEIN COMPLEX 4, EPSILON-1 SUBUNIT; AP4E1	0.0355502	5.37249	0.323597	0.570539
ENSG00000221838	AP4M1	protein_coding	Longin-like domain	adaptor related protein complex 4 mu 1 subunit	ADAPTOR-RELATED PROTEIN COMPLEX 4, MU-1 SUBUNIT; AP4M1;;MU-ADAPTIN-RELATED PROTEIN 2;;MU-ARP2	-0.0561866	3.87837	0.724723	0.396328
ENSG00000100478	AP4S1	protein_coding	Longin-like domain	adaptor related protein complex 4 sigma 1 subunit	ADAPTOR-RELATED PROTEIN COMPLEX 4, SIGMA-1 SUBUNIT; AP4S1	-0.00649505	2.05765	0.00329965	0.95429
ENSG00000254470	AP5B1	protein_coding		adaptor related protein complex 5 beta 1 subunit	ADAPTOR-RELATED PROTEIN COMPLEX 5, BETA-1 SUBUNIT; AP5B1;;ADAPTOR-RELATED PROTEIN COMPLEX 5, BETA SUBUNIT;;BETA-5;;DKFZp761E198	1.16772	6.97237	157.303	1.98191e-23
ENSG00000053770	AP5M1	protein_coding	Mu homology domain	adaptor related protein complex 5 mu 1 subunit	ADAPTOR-RELATED PROTEIN COMPLEX 5, MU-1 SUBUNIT; AP5M1;;MU-2/AP1M2 DOMAIN-CONTAINING DEATH-INDUCING PROTEIN; MUDENG;;MUD;;CHROMOSOME 14 OPEN READING FRAME 108; C14ORF108;;ADAPTOR-RELATED PROTEIN COMPLEX 5, MU SUBUNIT;;MU-5	-0.0911574	6.17697	1.94166	0.166115
ENSG00000125843	AP5S1	protein_coding	AP-5 complex subunit sigma-1	adaptor related protein complex 5 sigma 1 subunit	ADAPTOR-RELATED PROTEIN COMPLEX 5, SIGMA-1 SUBUNIT; AP5S1;;CHROMOSOME 20 OPEN READING FRAME 29; C20ORF29;;SIGMA 5	0.157504	2.96986	3.07831	0.0819465
ENSG00000242802	AP5Z1	protein_coding	Armadillo-like helical	adaptor related protein complex 5 zeta 1 subunit	ADAPTOR-RELATED PROTEIN COMPLEX 5, ZETA-1 SUBUNIT; AP5Z1;;KIAA0415;;SPG48 GENE	0.161149	5.93313	3.07705	0.0820081
ENSG00000120868	APAF1	protein_coding	CARD domain	apoptotic peptidase activating factor 1	APOPTOTIC PROTEASE ACTIVATING FACTOR 1; APAF1	1.34479	7.42704	294.658	7.91875e-34
ENSG00000011132	APBA3	protein_coding	PDZ domain	amyloid beta precursor protein binding family A member 3	AMYLOID BETA A4 PRECURSOR PROTEIN-BINDING, FAMILY A, MEMBER 3; APBA3;;X11-LIKE 2; X11L2;;MUNC18-1-INTERACTING PROTEIN 3, RAT, HOMOLOG OF;;MINT3, RAT, HOMOLOG OF	0.0924522	3.78828	0.755469	0.38652
ENSG00000077420	APBB1IP	protein_coding	Ras-associating (RA) domain	amyloid beta precursor protein binding family B member 1 interacting protein	APBB1-INTERACTING PROTEIN; APBB1IP;;RAP1-INTERACTING ADAPTOR MOLECULE; RIAM;;RETINOIC ACID-RESPONSIVE PROLINE-RICH PROTEIN 1; RARP1	0.995157	6.30795	448.622	5.89071e-42
ENSG00000163697	APBB2	protein_coding	WW domain	amyloid beta precursor protein binding family B member 2	AMYLOID BETA A4 PRECURSOR PROTEIN-BINDING, FAMILY B, MEMBER 2; APBB2;;FE65-LIKE 1; FE65L1	-0.6762	5.31236	157.843	1.76492e-23
ENSG00000113108	APBB3	protein_coding	WW domain	microRNA 6831	AMYLOID BETA A4 PRECURSOR PROTEIN-BINDING, FAMILY B, MEMBER 3; APBB3;;FE65-LIKE 2; FE65L2	2.32745	5.6185	191.559	2.64477e-26
ENSG00000134982	APC	protein_coding	Adenomatous polyposis coli (APC) family	APC, WNT signaling pathway regulator		0.361337	5.17336	38.3067	9.10158e-09
ENSG00000115266	APC2	protein_coding	Adenomatous polyposis coli (APC) family	APC2, WNT signaling pathway regulator		0.317641	-0.913376	0.832888	0.363305
ENSG00000164062	APEH	protein_coding	Peptidase S9, prolyl oligopeptidase, catalytic domain	acylaminoacyl-peptide hydrolase	ACYLPEPTIDE HYDROLASE; APH;;N-ACYLAMINOACYLPEPTIDE HYDROLASE; APEH	-0.558198	7.60471	95.7829	6.59052e-17
ENSG00000100823	APEX1	protein_coding	AP endonuclease 1	apurinic/apyrimidinic endodeoxyribonuclease 1	APEX NUCLEASE 1; APEX1;;APURINIC ENDONUCLEASE; APE; APE1;;HUMAN APURINIC ENDONUCLEASE 1; HAP1;;APURINIC/APYRIMIDINIC EXONUCLEASE;;REDOX FACTOR 1; REF1	-0.957411	8.26003	382.882	8.51849e-39
ENSG00000169188	APEX2	protein_coding	AP endonuclease 1	apurinic/apyrimidinic endodeoxyribonuclease 2	APEX NUCLEASE (APURINIC/APYRIMIDINIC ENDONUCLEASE) 2; APEX2;;APE2;;XTH2;;APURINIC/APYRIMIDINIC ENDONUCLEASE LIKE-2; APEXL2;;APEX NUCLEASE-LIKE 2	-0.125085	5.24789	5.47538	0.0209712
ENSG00000117362	APH1A	protein_coding	Gamma-secretase subunit Aph-1	aph-1 homolog A, gamma-secretase subunit	ANTERIOR PHARYNX DEFECTIVE 1, C. ELEGANS, HOMOLOG OF, A; APH1A	-0.389573	8.3278	77.7919	1.24089e-14
ENSG00000138613	APH1B	protein_coding	Gamma-secretase subunit Aph-1	aph-1 homolog B, gamma-secretase subunit	ANTERIOR PHARYNX DEFECTIVE 1, C. ELEGANS, HOMOLOG OF, B; APH1B	0.839953	4.88811	161.416	8.23146e-24
ENSG00000166181	API5	protein_coding	Apoptosis inhibitory 5	apoptosis inhibitor 5	APOPTOSIS INHIBITOR 5; API5;;ANTIAPOPTOSIS CLONE 11; AAC11	-0.566188	7.84781	73.9857	4.00445e-14
ENSG00000149089	APIP	protein_coding	Class II aldolase/adducin N-terminal	APAF1 interacting protein	APAF1-INTERACTING PROTEIN; APIP;;CGI29;;MMRP19	-0.615048	5.11033	80.7793	5.02899e-15
ENSG00000169621	APLF	protein_coding	Forkhead-associated (FHA) domain	aprataxin and PNKP like factor	CHROMOSOME 2 OPEN READING FRAME 13; C2ORF13;;APRATAXIN- AND PNK-LIKE FACTOR; APLF	0.803945	1.34914	26.9451	8.8601e-07
ENSG00000171388	APLN	protein_coding	Apelin	apelin	APELIN; APLN;;APJ RECEPTOR LIGAND	-0.00872406	0.881713	0.00177889	0.966429
ENSG00000084234	APLP2	protein_coding		amyloid beta precursor like protein 2	AMYLOID BETA A4 PRECURSOR-LIKE PROTEIN 2; APLP2;;AMYLOID PRECURSOR-LIKE PROTEIN 2;;CDEI-BINDING PROTEIN; CDEBP;;SPERM MEMBRANE PROTEIN	1.04757	9.84182	554.357	2.44228e-46
ENSG00000101474	APMAP	protein_coding	Strictosidine synthase	adipocyte plasma membrane associated protein	ADIPOCYTE PLASMA MEMBRANE-ASSOCIATED PROTEIN; APMAP;;CHROMOSOME 20 OPEN READING FRAME 3; C20ORF3;;BSCV	0.361512	7.48086	61.2907	2.39067e-12
ENSG00000128383	APOBEC3A	protein_coding	Cytidine and deoxycytidylate deaminases, zinc-binding	APOBEC3A and APOBEC3B deletion hybrid	APOLIPOPROTEIN B mRNA-EDITING ENZYME, CATALYTIC POLYPEPTIDE-LIKE 3A;APOBEC3A;;PHORBOLIN 1	1.84878	-1.79951	2.90857	0.0912251
ENSG00000179750	APOBEC3B	protein_coding	Cytidine and deoxycytidylate deaminases, zinc-binding	apolipoprotein B mRNA editing enzyme catalytic subunit 3B	APOLIPOPROTEIN B mRNA-EDITING ENZYME, CATALYTIC POLYPEPTIDE-LIKE 3B;APOBEC3B;;PHORBOLIN 1-RELATED PROTEIN	0.549838	4.60061	37.344	1.322e-08
ENSG00000244509	APOBEC3C	protein_coding	Cytidine and deoxycytidylate deaminases, zinc-binding	apolipoprotein B mRNA editing enzyme catalytic subunit 3C	APOLIPOPROTEIN B mRNA-EDITING ENZYME, CATALYTIC POLYPEPTIDE-LIKE 3C;APOBEC3C;;A3C	0.0787876	4.99835	1.90627	0.169996
ENSG00000243811	APOBEC3D	protein_coding	Cytidine and deoxycytidylate deaminases, zinc-binding	apolipoprotein B mRNA editing enzyme catalytic subunit 3D	APOLIPOPROTEIN B mRNA-EDITING ENZYME, CATALYTIC POLYPEPTIDE-LIKE 3D;APOBEC3D	0.769281	0.770213	18.5659	6.32356e-05
ENSG00000239713	APOBEC3G	protein_coding	Cytidine and deoxycytidylate deaminases, zinc-binding	apolipoprotein B mRNA editing enzyme catalytic subunit 3G	APOLIPOPROTEIN B mRNA-EDITING ENZYME, CATALYTIC POLYPEPTIDE-LIKE 3G;APOBEC3G;;PHORBOLIN-LIKE PROTEIN MDS019; MDS019;;CEM15;;dJ494G10.1;;FLJ12740;;bK150C2.7	1.4432	1.86529	23.4201	3.99048e-06
ENSG00000184730	APOBR	protein_coding	Apolipoprotein B receptor	apolipoprotein B receptor	APOLIPOPROTEIN B RECEPTOR; APOBR;;APOLIPOPROTEIN B48 RECEPTOR; APOB48R	2.7109	7.44918	552.121	6.34881e-46
ENSG00000130203	APOE	protein_coding	Apolipoprotein A/E	apolipoprotein E		0.5464	-0.628307	2.11134	0.148873
ENSG00000128335	APOL2	protein_coding	Apolipoprotein L	apolipoprotein L2	APOLIPOPROTEIN L-II; APOL2;;APOL-II	0.125666	4.04872	3.91094	0.0503106
ENSG00000221963	APOL6	protein_coding	Apolipoprotein L	apolipoprotein L6	APOLIPOPROTEIN L-VI; APOL6;;APOL-VI	0.468712	3.74959	27.1674	8.06964e-07
ENSG00000178878	APOLD1	protein_coding		apolipoprotein L domain containing 1	APOLIPOPROTEIN L DOMAIN-CONTAINING 1; APOLD1;;VASCULAR EARLY RESPONSE GENE; VERGE	1.24687	1.57267	60.0355	3.64065e-12
ENSG00000204444	APOM	protein_coding	Calycin-like	apolipoprotein M	APOLIPOPROTEIN M; APOM;;NG20, MOUSE, HOMOLOG OF	0.393869	0.617287	5.24978	0.023729
ENSG00000184831	APOO	protein_coding	MICOS complex subunit MIC26/MIC27	apolipoprotein O		-1.15059	2.48312	136.573	2.05607e-21
ENSG00000155008	APOOL	protein_coding	MICOS complex subunit MIC26/MIC27	apolipoprotein O like	APOLIPOPROTEIN O-LIKE; APOOL;;FAMILY WITH SEQUENCE SIMILARITY 121A; FAM121A;;CHROMOSOME X OPEN READING FRAME 33; CXORF33;;MITOCHONDRIAL CONTACT SITE AND CRISTAE ORGANIZING SYSTEM, 27-KD SUBUNIT;MIC27;;MICOS COMPLEX, 27-KD SUBUNIT	-0.247071	4.92174	12.142	0.000693381
ENSG00000248122	APOOP4	processed_pseudogene				-1.2421	-0.66214	22.2736	6.57429e-06
ENSG00000256053	APOPT1	protein_coding	Uncharacterised protein family UPF0671	apoptogenic 1, mitochondrial	APOPTOGENIC PROTEIN 1, MITOCHONDRIAL; APOPT1;;APOPTOGENIC PROTEIN; APOP	-0.522967	2.77861	38.4063	8.75824e-09
ENSG00000142192	APP	protein_coding	Pancreatic trypsin inhibitor Kunitz domain	amyloid beta precursor protein	AMYLOID BETA A4 PRECURSOR PROTEIN; APP;;AMYLOID OF AGING AND ALZHEIMER DISEASE; AAA;;CEREBRAL VASCULAR AMYLOID PEPTIDE; CVAP;;PROTEASE NEXIN II; PN2	-0.0556926	9.64516	3.51118	0.0634368
ENSG00000062725	APPBP2	protein_coding	Tetratricopeptide-like helical domain	amyloid beta precursor protein binding protein 2	AMYLOID BETA PRECURSOR PROTEIN-BINDING PROTEIN 2; APPBP2;;PROTEIN INTERACTING WITH APP TAIL 1; PAT1	0.271707	5.52022	16.3553	9.41909e-05
ENSG00000157500	APPL1	protein_coding	Pleckstrin homology domain	adaptor protein, phosphotyrosine interacting with PH domain and leucine zipper 1	ADAPTOR PROTEIN, PHOSPHOTYROSINE INTERACTION, PH DOMAIN, AND LEUCINEZIPPER-CONTAINING PROTEIN 1; APPL1;;ADAPTOR PROTEIN CONTAINING PH DOMAIN, PTB DOMAIN, AND LEUCINE ZIPPERMOTIF 1;;APPL;;DIP13-ALPHA;;AKT2 INTERACTOR	-0.252343	7.05387	14.6369	0.000210197
ENSG00000136044	APPL2	protein_coding	Pleckstrin homology domain	adaptor protein, phosphotyrosine interacting with PH domain and leucine zipper 2	ADAPTOR PROTEIN, PHOSPHOTYROSINE INTERACTION, PH DOMAIN, AND LEUCINEZIPPER-CONTAINING PROTEIN 2; APPL2;;ADAPTOR PROTEIN CONTAINING PH DOMAIN, PTB DOMAIN, AND LEUCINE ZIPPERMOTIF 2;;DIP13-BETA;;FLJ10659	0.724176	4.01202	120.939	8.84822e-20
ENSG00000198931	APRT	protein_coding	Phosphoribosyltransferase domain	adenine phosphoribosyltransferase	ADENINE PHOSPHORIBOSYLTRANSFERASE; APRT	-0.915179	5.75011	101.726	1.28953e-17
ENSG00000214293	APTR	lincRNA				0.388473	1.16151	8.11288	0.00518914
ENSG00000137074	APTX	protein_coding	Forkhead-associated (FHA) domain	aprataxin	APRATAXIN; APTX;;FLJ20157	-0.622998	4.90184	161.648	7.83573e-24
ENSG00000178301	AQP11	protein_coding	Major intrinsic protein	aquaporin 11	AQUAPORIN 11; AQP11;;AQPX1	0.980894	-0.978624	5.61078	0.0194794
ENSG00000165272	AQP3	protein_coding	Major intrinsic protein	aquaporin 3 (Gill blood group)	AQUAPORIN 3; AQP3	0.121038	0.532712	0.332041	0.565561
ENSG00000103569	AQP9	protein_coding	Major intrinsic protein	aquaporin 9	AQUAPORIN 9; AQP9	3.02074	4.34485	183.259	1.35015e-25
ENSG00000021776	AQR	protein_coding	CWF11 family	aquarius intron-binding spliceosomal factor	AQUARIUS, MOUSE, HOMOLOG OF; AQR;;INTRON-BINDING PROTEIN, 160-KD; IBP160;;KIAA0560	-0.327229	6.52892	34.6853	3.75639e-08
ENSG00000078061	ARAF	protein_coding	Protein kinase domain	A-Raf proto-oncogene, serine/threonine kinase	V-RAF MURINE SARCOMA 3611 VIRAL ONCOGENE HOMOLOG 1; ARAF1;;ONCOGENE ARAF1;;RAFA1;;ONCOGENE PKS2	0.272881	6.31589	15.7951	0.000122166
ENSG00000186635	ARAP1	protein_coding	Ras-associating (RA) domain	ArfGAP with RhoGAP domain, ankyrin repeat and PH domain 1	CENTAURIN, DELTA-2; CENTD2;;ARF-GAP, RHO-GAP, ANKYRIN REPEAT, AND PLECKSTRIN HOMOLOGY DOMAINS-CONTAININGPROTEIN 1; ARAP1;;KIAA0782	1.23618	8.16949	253.058	4.22288e-31
ENSG00000047365	ARAP2	protein_coding	Ras-associating (RA) domain	ArfGAP with RhoGAP domain, ankyrin repeat and PH domain 2	CENTAURIN, DELTA-1; CENTD1;;ARF-GAP, RHO-GAP, ANKYRIN REPEAT, AND PLECKSTRIN HOMOLOGY DOMAINS-CONTAININGPROTEIN 2; ARAP2;;KIAA0580	1.97605	5.81932	314.77	4.7806e-35
ENSG00000120318	ARAP3	protein_coding	Ras-associating (RA) domain	ArfGAP with RhoGAP domain, ankyrin repeat and PH domain 3	CENTAURIN, DELTA-3; CENTD3;;ARF-GAP, RHO-GAP, ANKYRIN REPEAT, AND PLECKSTRIN HOMOLOGY DOMAINS-CONTAININGPROTEIN 3; ARAP3	1.8305	5.19703	236.982	5.79075e-30
ENSG00000095139	ARCN1	protein_coding	Longin-like domain	archain 1	ARCHAIN 1; ARCN1;;COATOMER PROTEIN COMPLEX, SUBUNIT DELTA; COPD;;COP, DELTA	0.114769	8.0424	8.64929	0.00394067
ENSG00000119682	AREL1	protein_coding	HECT domain	apoptosis resistant E3 ubiquitin protein ligase 1	APOPTOSIS-RESISTANT E3 UBIQUITIN PROTEIN LIGASE 1; AREL1;;KIAA0317	0.136355	5.78572	12.6701	0.000536996
ENSG00000143761	ARF1	protein_coding	Small GTP-binding protein domain	microRNA 3620	ADP-RIBOSYLATION FACTOR 1; ARF1	-0.25622	8.80627	23.906	3.23432e-06
ENSG00000134287	ARF3	protein_coding	Small GTP-binding protein domain	ADP ribosylation factor 3	ADP-RIBOSYLATION FACTOR 3; ARF3	0.238602	7.99309	57.3601	9.01741e-12
ENSG00000168374	ARF4	protein_coding	Small GTP-binding protein domain	ADP ribosylation factor 4	ADP-RIBOSYLATION FACTOR 4; ARF4;;ADP-RIBOSYLATION FACTOR 2, FORMERLY; ARF2, FORMERLY	-0.144108	6.75767	4.85782	0.0294674
ENSG00000004059	ARF5	protein_coding	Small GTP-binding protein domain	ADP ribosylation factor 5	ADP-RIBOSYLATION FACTOR 5; ARF5	0.331827	6.04694	25.1298	1.91263e-06
ENSG00000165527	ARF6	protein_coding	Small GTP-binding protein domain	ADP ribosylation factor 6	ADP-RIBOSYLATION FACTOR 6; ARF6	0.0785595	7.63133	3.47259	0.0648868
ENSG00000101199	ARFGAP1	protein_coding	Arf GTPase activating protein	ADP ribosylation factor GTPase activating protein 1	ADP-RIBOSYLATION FACTOR GTPase-ACTIVATING PROTEIN 1; ARFGAP1	0.306016	6.46169	19.6973	2.05691e-05
ENSG00000149182	ARFGAP2	protein_coding	Arf GTPase activating protein	ADP ribosylation factor GTPase activating protein 2	ADP-RIBOSYLATION FACTOR GTPase-ACTIVATING PROTEIN 2; ARFGAP2;;ZINC FINGER PROTEIN 289, ID1-REGULATED, FORMERLY; ZNF289, FORMERLY	-0.136966	7.25907	7.27006	0.00804006
ENSG00000242247	ARFGAP3	protein_coding	Arf GTPase activating protein	ADP ribosylation factor GTPase activating protein 3	ADP-RIBOSYLATION FACTOR GTPase-ACTIVATING PROTEIN 3; ARFGAP3	1.18445	5.46412	427.811	5.3567e-41
ENSG00000066777	ARFGEF1	protein_coding	Sec7 domain	ADP ribosylation factor guanine nucleotide exchange factor 1	ADP-RIBOSYLATION FACTOR GUANINE NUCLEOTIDE EXCHANGE FACTOR 1; ARFGEF1;;ADP-RIBOSYLATION FACTOR-GUANINE NUCLEOTIDE EXCHANGE PROTEIN 1; ARFGEP1;;BREFELDIN A-INHIBITED GUANINE NUCLEOTIDE EXCHANGE PROTEIN 1; BIG1;;p200	0.151096	7.35236	9.28854	0.0028479
ENSG00000124198	ARFGEF2	protein_coding	Sec7 domain	ADP ribosylation factor guanine nucleotide exchange factor 2	ADP-RIBOSYLATION FACTOR GUANINE NUCLEOTIDE EXCHANGE FACTOR 2; ARFGEF2;;BREFELDIN A-INHIBITED GUANINE NUCLEOTIDE EXCHANGE PROTEIN 2; BIG2	0.00190317	7.10607	0.00208329	0.963672
ENSG00000164144	ARFIP1	protein_coding	Arfaptin homology (AH) domain	ADP ribosylation factor interacting protein 1	ADP-RIBOSYLATION FACTOR-INTERACTING PROTEIN 1; ARFIP1;;ARFAPTIN 1	0.30035	5.82985	15.3855	0.000147903
ENSG00000132254	ARFIP2	protein_coding	Arfaptin homology (AH) domain	ADP ribosylation factor interacting protein 2	ADP-RIBOSYLATION FACTOR-INTERACTING PROTEIN 2; ARFIP2;;ARFAPTIN 2;;PARTNER OF RAC1; POR1	-0.525169	5.05549	74.7824	3.12738e-14
ENSG00000101246	ARFRP1	protein_coding	Small GTPase superfamily, ARF/SAR type	ADP ribosylation factor related protein 1	ADP-RIBOSYLATION FACTOR-RELATED PROTEIN 1; ARFRP1;;ARP	-0.184246	4.6999	5.84235	0.0171804
ENSG00000118520	ARG1	protein_coding	Ureohydrolase	arginase 1	ARGINASE 1; ARG1;;ARGINASE, LIVER	1.73881	0.573174	39.744	5.23722e-09
ENSG00000081181	ARG2	protein_coding	Ureohydrolase	arginase 2	ARGINASE 2; ARG2	-0.592264	0.475485	6.63588	0.0112651
ENSG00000134884	ARGLU1	protein_coding	Arginine and glutamate-rich protein 1	arginine and glutamate rich 1	ARGININE- AND GLUTAMATE-RICH PROTEIN 1; ARGLU1	0.502483	6.61434	64.9772	7.07367e-13
ENSG00000175220	ARHGAP1	protein_coding	Rho GTPase-activating protein domain	Rho GTPase activating protein 1	RHO GTPase-ACTIVATING PROTEIN 1; ARHGAP1;;GTPase-ACTIVATING PROTEIN, RHO, 1;;RHOGAP1;;RHOGAP;;CDC42GAP	0.420929	6.71577	46.0368	4.96017e-10
ENSG00000071205	ARHGAP10	protein_coding	Rho GTPase-activating protein domain	Rho GTPase activating protein 10	RHO GTPase-ACTIVATING PROTEIN 10; ARHGAP10;;GTPase-ACTIVATING PROTEIN, RHO, 10;;PSGAP;;GTPase REGULATOR ASSOCIATED WITH FOCAL ADHESION KINASE 2; GRAF2	-0.604665	4.17434	97.835	3.73266e-17
ENSG00000198826	ARHGAP11A	protein_coding	Rho GTPase-activating protein domain	Rho GTPase activating protein 11A	RHO GTPase-ACTIVATING PROTEIN 11A; ARHGAP11A;;KIAA0013	-0.172536	7.04612	6.99021	0.00931309
ENSG00000187951	ARHGAP11B	protein_coding	Rho GTPase-activating protein domain	OTU deubiquitinase 7A pseudogene	RHO GTPase-ACTIVATING PROTEIN 11B; ARHGAP11B;;FAMILY WITH SEQUENCE SIMILARITY 7, MEMBER B1; FAM7B1	0.816804	3.62282	91.9475	1.93624e-16
ENSG00000165322	ARHGAP12	protein_coding	Rho GTPase-activating protein domain	Rho GTPase activating protein 12	RHO GTPase-ACTIVATING PROTEIN 12; ARHGAP12	0.582931	3.53529	40.6229	3.74554e-09
ENSG00000075884	ARHGAP15	protein_coding	Pleckstrin homology domain	Rho GTPase activating protein 15	RHO GTPase-ACTIVATING PROTEIN 15; ARHGAP15;;BM046	0.24002	6.06985	22.7281	5.39048e-06
ENSG00000140750	ARHGAP17	protein_coding	Rho GTPase-activating protein domain	Rho GTPase activating protein 17	RHO GTPase-ACTIVATING PROTEIN 17; ARHGAP17;;RHOGAP INTERACTING WITH CIP4 HOMOLOGS 1; RICH1;;NADRIN, RAT, HOMOLOG OF	-0.438758	5.83927	84.44	1.69443e-15
ENSG00000146376	ARHGAP18	protein_coding	Rho GTPase-activating protein domain	Rho GTPase activating protein 18	RHO GTPase-ACTIVATING PROTEIN 18; ARHGAP18	0.247768	4.39652	10.7819	0.0013501
ENSG00000213390	ARHGAP19	protein_coding	Rho GTPase-activating protein domain	Rho GTPase activating protein 19	RHO GTPase-ACTIVATING PROTEIN 19; ARHGAP19;;GTPase-ACTIVATING PROTEIN, RHO, 19	0.129059	6.06391	8.06194	0.00532726
ENSG00000275832	ARHGAP23	protein_coding	Rho GTPase-activating protein domain	Rho GTPase activating protein 23	RHO GTPase-ACTIVATING PROTEIN 23; ARHGAP23;;KIAA1501	-1.2016	4.69834	161.904	7.42306e-24
ENSG00000260781	ARHGAP23P1	transcribed_unprocessed_pseudogene				-1.0636	-0.793534	15.3597	0.000149697
ENSG00000138639	ARHGAP24	protein_coding	Rho GTPase-activating protein domain	Rho GTPase activating protein 24	RHO GTPase-ACTIVATING PROTEIN 24; ARHGAP24;;RAC1- AND CDC42-SPECIFIC GTPase-ACTIVATING PROTEIN, 72-KD; RCGAP72;;p73RHOGAP;;FILAMIN A-ASSOCIATED RHOGAP; FILGAP	2.68247	1.83939	111.382	9.99728e-19
ENSG00000163219	ARHGAP25	protein_coding	Rho GTPase-activating protein domain	Rho GTPase activating protein 25		1.52278	6.63887	621.172	9.16375e-49
ENSG00000145819	ARHGAP26	protein_coding	Rho GTPase-activating protein domain	Rho GTPase activating protein 26	RHO GTPase-ACTIVATING PROTEIN 26; ARHGAP26;;GTPase REGULATOR ASSOCIATED WITH FOCAL ADHESION KINASE; GRAF;;KIAA0621GRAF/MLL FUSION GENE, INCLUDED	2.16986	6.60549	685.595	6.65134e-51
ENSG00000159314	ARHGAP27	protein_coding	Rho GTPase-activating protein domain	Rho GTPase activating protein 27	RHO GTPase-ACTIVATING PROTEIN 27; ARHGAP27;;CIN85-ASSOCIATED MULTIDOMAIN-CONTAINING RhoGAP1; CAMGAP1	1.19704	6.76748	206.421	1.18921e-27
ENSG00000186517	ARHGAP30	protein_coding	Rho GTPase-activating protein domain	Rho GTPase activating protein 30	RHO GTPase-ACTIVATING PROTEIN 30; ARHGAP30	1.4878	8.21739	835.345	2.81667e-55
ENSG00000031081	ARHGAP31	protein_coding	Rho GTPase-activating protein domain	Rho GTPase activating protein 31	RHO GTPase-ACTIVATING PROTEIN 31; ARHGAP31;;CDC42 GTPase-ACTIVATING PROTEIN; CDGAP;;KIAA1204	3.15576	-1.64704	8.62073	0.00405732
ENSG00000134909	ARHGAP32	protein_coding	Rho GTPase-activating protein domain	Rho GTPase activating protein 32	RHO GTPase INVOLVED IN BETA-CATENIN, N-CADHERIN, AND NMDA RECEPTORSIGNALING;;RICS;;GTPase INTERACTING WITH TRKA; GRIT;;p200RHOGAP;;p250GAP;;KIAA0712PX-RICS ISOFORM, INCLUDED; PXRICS, INCLUDED	-0.0393463	3.57023	0.300992	0.584301
ENSG00000004777	ARHGAP33	protein_coding	Rho GTPase-activating protein domain	Rho GTPase activating protein 33	RHO GTPase-ACTIVATING PROTEIN 33; ARHGAP33;;TC10/CDC42 GTPase-ACTIVATING PROTEIN; TCGAP	2.53453	2.99354	137.201	2.21169e-21
ENSG00000160007	ARHGAP35	protein_coding	Rho GTPase-activating protein domain	Rho GTPase activating protein 35	GLUCOCORTICOID RECEPTOR DNA-BINDING FACTOR 1; GRLF1;;p190A, RAT, HOMOLOG OF; p190A;;p190RHOGAP	-0.0476256	7.17246	1.55015	0.215587
ENSG00000089820	ARHGAP4	protein_coding	Rho GTPase-activating protein domain	Rho GTPase activating protein 4	RHO GTPase-ACTIVATING PROTEIN 4; ARHGAP4;;RHO GAP HEMATOPOIETIC PROTEIN C1; RGC1;;GTPase-ACTIVATING PROTEIN, RHO, 4; RHOGAP4	0.441309	7.8321	21.5591	9.01348e-06
ENSG00000006740	ARHGAP44	protein_coding	Rho GTPase-activating protein domain	Rho GTPase activating protein 44		-0.491641	1.72663	12.6252	0.000548755
ENSG00000180448	ARHGAP45	protein_coding	Rho GTPase-activating protein domain	Rho GTPase activating protein 45	MINOR HISTOCOMPATIBILITY ANTIGEN HA-1; HMHA1;;HISTOCOMPATIBILITY (MINOR) HA-1;;HLA-HA1;;KIAA0223	0.655561	8.35622	43.1587	1.4779e-09
ENSG00000100852	ARHGAP5	protein_coding		Rho GTPase activating protein 5	RHO GTPase-ACTIVATING PROTEIN 5; ARHGAP5;;GTPase-ACTIVATING PROTEIN, RHO, 5; RHOGAP5	0.028491	5.85145	0.105023	0.746459
ENSG00000258655	ARHGAP5-AS1	antisense				0.674422	-1.13206	3.29253	0.0721433
ENSG00000123329	ARHGAP9	protein_coding	Rho GTPase-activating protein domain	Rho GTPase activating protein 9	RHO GTPase-ACTIVATING PROTEIN 9; ARHGAP9	1.63664	7.21074	273.584	1.75786e-32
ENSG00000141522	ARHGDIA	protein_coding	Rho protein GDP-dissociation inhibitor	Rho GDP dissociation inhibitor alpha	RHO GDP-DISSOCIATION INHIBITOR ALPHA; ARHGDIA;;RHOGDI;;GDP-DISSOCIATION INHIBITOR, APLYSIA RAS-RELATED 1; GDIA1	-0.323213	8.65184	14.3252	0.000243541
ENSG00000111348	ARHGDIB	protein_coding	Rho protein GDP-dissociation inhibitor	Rho GDP dissociation inhibitor beta	RHO GDP-DISSOCIATION INHIBITOR BETA; ARHGDIB;;GDP-DISSOCIATION INHIBITOR D4; GDID4; D4;;LYGDI	0.384317	10.0947	71.6183	8.40049e-14
ENSG00000076928	ARHGEF1	protein_coding	Dbl homology (DH) domain	uncharacterized LOC100505585	RHO GUANINE NUCLEOTIDE EXCHANGE FACTOR 1; ARHGEF1;;GUANINE NUCLEOTIDE EXCHANGE FACTOR, 115-KD;;p115-RhoGEF;;LSC, MOUSE, HOMOLOG OF; LSC	0.436075	7.95961	33.5334	5.94305e-08
ENSG00000132694	ARHGEF11	protein_coding	Dbl homology (DH) domain	Rho guanine nucleotide exchange factor 11	RHO GUANINE NUCLEOTIDE EXCHANGE FACTOR 11; ARHGEF11;;PDZ-RHOGEF;;GLUTAMATE TRANSPORTER EAAT4-ASSOCIATED PROTEIN 48; GTRAP48;;KIAA0380	1.19733	6.46717	291.422	1.26068e-33
ENSG00000130762	ARHGEF16	protein_coding	Dbl homology (DH) domain	Rho guanine nucleotide exchange factor 16		2.2741	-0.739385	31.5351	1.68101e-07
ENSG00000110237	ARHGEF17	protein_coding	Dbl homology (DH) domain	Rho guanine nucleotide exchange factor 17	RHO GUANINE NUCLEOTIDE EXCHANGE FACTOR 17; ARHGEF17;;RHOGEF17;;RHO-SPECIFIC GUANINE NUCLEOTIDE EXCHANGE FACTOR, 164-KD; p164RHOGEF;;TUMOR ENDOTHELIAL MARKER 4; TEM4;;KIAA0337	0.651347	4.34434	39.1119	6.67376e-09
ENSG00000104880	ARHGEF18	protein_coding	Dbl homology (DH) domain	Rho/Rac guanine nucleotide exchange factor 18	RHO GUANINE NUCLEOTIDE EXCHANGE FACTOR 18; ARHGEF18;;RHO-SPECIFIC GUANINE NUCLEOTIDE EXCHANGE FACTOR, 114-KD; p114RHOGEF;;KIAA0521	0.0294263	2.84363	0.0879316	0.767346
ENSG00000142632	ARHGEF19	protein_coding	Dbl homology (DH) domain	Rho guanine nucleotide exchange factor 19	RHO GUANINE NUCLEOTIDE EXCHANGE FACTOR 19; ARHGEF19;;WEAKLY SIMILAR TO RHOGEF5; WGEF	0.195281	2.32246	2.78549	0.0977806
ENSG00000116584	ARHGEF2	protein_coding	Dbl homology (DH) domain	Rho/Rac guanine nucleotide exchange factor 2		-0.013944	9.07095	0.0565837	0.812393
ENSG00000240771	ARHGEF25	protein_coding	Dbl homology (DH) domain	Rho guanine nucleotide exchange factor 25	RHO GUANINE NUCLEOTIDE EXCHANGE FACTOR 25; ARHGEF25;;RAC- AND CDC42-SPECIFIC GUANINE NUCLEOTIDE EXCHANGE FACTOR;;GUANINE NUCLEOTIDE EXCHANGE FACTOR GEFT; GEFT;;p63RHOGEF	-1.0804	0.250004	19.8814	2.01491e-05
ENSG00000163947	ARHGEF3	protein_coding	Dbl homology (DH) domain	Rho guanine nucleotide exchange factor 3	RHO GUANINE NUCLEOTIDE EXCHANGE FACTOR 3; ARHGEF3;;XPLN	0.259849	-1.16992	0.2531	0.615841
ENSG00000137135	ARHGEF39	protein_coding	Dbl homology (DH) domain	Rho guanine nucleotide exchange factor 39		0.284138	4.32372	12.9311	0.00047356
ENSG00000165801	ARHGEF40	protein_coding	Dbl homology (DH) domain	Rho guanine nucleotide exchange factor 40	SOLO GENE;;SOLO;;FLJ10357	1.13028	6.58741	187.409	4.24089e-26
ENSG00000129675	ARHGEF6	protein_coding	Dbl homology (DH) domain	Rac/Cdc42 guanine nucleotide exchange factor 6	RHO GUANINE NUCLEOTIDE EXCHANGE FACTOR 6; ARHGEF6;;PAK-INTERACTING EXCHANGE FACTOR, ALPHA; PIXA;;ALPHA-PIX;;COOL2	0.0151192	8.28055	0.125065	0.724238
ENSG00000102606	ARHGEF7	protein_coding	Dbl homology (DH) domain	Rho guanine nucleotide exchange factor 7		0.161194	6.81707	25.6607	1.52538e-06
ENSG00000131089	ARHGEF9	protein_coding	Dbl homology (DH) domain	Cdc42 guanine nucleotide exchange factor 9	RHO GUANINE NUCLEOTIDE EXCHANGE FACTOR 9; ARHGEF9;;PEM2;;COLLYBISTIN;;KIAA0424	0.654772	5.30294	147.094	1.86184e-22
ENSG00000117713	ARID1A	protein_coding	ARID DNA-binding domain	AT-rich interaction domain 1A	AT-RICH INTERACTION DOMAIN-CONTAINING PROTEIN 1A; ARID1A;;ARID-CONTAINING PROTEIN 1A;;SWI/SNF-RELATED, MATRIX-ASSOCIATED, ACTIN-DEPENDENT REGULATOR OF CHROMATIN,SUBFAMILY F, MEMBER 1; SMARCF1;;BRG1-ASSOCIATED FACTOR, 250-KD, A; BAF250A;;CHROMOSOME 1 /.../READING FRAME 4; C1ORF4;;B120 GENE; B120;;p270	0.233933	8.22741	17.4616	5.6603e-05
ENSG00000049618	ARID1B	protein_coding	ARID DNA-binding domain	AT-rich interaction domain 1B	AT-RICH INTERACTION DOMAIN-CONTAINING PROTEIN 1B; ARID1B;;ARID-CONTAINING PROTEIN 1B;;BAF-ASSOCIATED FACTOR, 250-KD, B; BAF250B;;ELD/OSA1;;KIAA1235	0.0910213	7.05359	3.82391	0.052897
ENSG00000189079	ARID2	protein_coding	ARID DNA-binding domain	AT-rich interaction domain 2	AT-RICH INTERACTION DOMAIN-CONTAINING PROTEIN 2; ARID2;;ARID-CONTAINING PROTEIN 2;;BRG1-ASSOCIATED FACTOR, 200-KD; BAF200;;KIAA1557	0.298979	6.4502	41.4596	2.72718e-09
ENSG00000116017	ARID3A	protein_coding	ARID DNA-binding domain	AT-rich interaction domain 3A	AT-RICH INTERACTION DOMAIN-CONTAINING PROTEIN 3A; ARID3A;;ARID-CONTAINING PROTEIN 3A;;DEAD RINGER, DROSOPHILA, HOMOLOG-LIKE 1; DRIL1	0.428528	7.96864	58.5534	6.0064e-12
ENSG00000179361	ARID3B	protein_coding	ARID DNA-binding domain	AT-rich interaction domain 3B	AT-RICH INTERACTION DOMAIN-CONTAINING PROTEIN 3B; ARID3B;;ARID-CONTAINING PROTEIN 3B;;DEAD RINGER, DROSOPHILA, HOMOLOG-LIKE 2; DRIL2;;BDP;;DEAD RINGER, DROSOPHILA, HOMOLOG OF, 2	1.17104	4.69521	202.971	2.23891e-27
ENSG00000032219	ARID4A	protein_coding	Chromo/chromo shadow domain	AT-rich interaction domain 4A	AT-RICH INTERACTION DOMAIN-CONTAINING PROTEIN 4A; ARID4A;;ARID-CONTAINING PROTEIN 4A;;RETINOBLASTOMA-BINDING PROTEIN 1; RBP1; RBBP1	0.600152	6.08302	78.8855	8.90077e-15
ENSG00000054267	ARID4B	protein_coding	AT-rich interactive domain-containing protein 4B	AT-rich interaction domain 4B		0.747616	6.39613	161.735	7.69324e-24
ENSG00000196843	ARID5A	protein_coding	ARID DNA-binding domain	AT-rich interaction domain 5A	AT-RICH INTERACTION DOMAIN-CONTAINING PROTEIN 5A; ARID5A;;ARID-CONTAINING PROTEIN 5A;;MODULATOR RECOGNITION FACTOR 1; MRF1	0.258329	5.67498	10.659	0.00143482
ENSG00000150347	ARID5B	protein_coding	ARID DNA-binding domain	AT-rich interaction domain 5B	AT-RICH INTERACTION DOMAIN-CONTAINING PROTEIN 5B; ARID5B;;ARID-CONTAINING PROTEIN 5B;;MODULATOR RECOGNITION FACTOR 2; MRF2;;DESRT, MOUSE, HOMOLOG OF; DESRT	-1.41221	-0.323905	2.37697	0.126404
ENSG00000166233	ARIH1	protein_coding	Zinc finger, RING-type	microRNA 630	ARIADNE, DROSOPHILA, HOMOLOG OF, 1; ARIH1;;HHARI;;UBCH7-BINDING PROTEIN; UBCH7BP	-0.0782366	7.27316	3.61847	0.059586
ENSG00000177479	ARIH2	protein_coding	E3 ubiquitin ligase RBR family	ariadne RBR E3 ubiquitin protein ligase 2		-0.774019	6.71502	630.287	4.44948e-49
ENSG00000120805	ARL1	protein_coding	Small GTP-binding protein domain	ADP ribosylation factor like GTPase 1	ADP-RIBOSYLATION FACTOR-LIKE 1; ARL1	-0.485543	5.49075	46.5576	4.09892e-10
ENSG00000152213	ARL11	protein_coding	Small GTP-binding protein domain	ADP ribosylation factor like GTPase 11	ADP-RIBOSYLATION FACTOR-LIKE 11; ARL11;;ADP-RIBOSYLATION FACTOR-LIKE TUMOR SUPPRESSOR 1; ARLTS1	0.650859	4.39887	120.942	8.84143e-20
ENSG00000169379	ARL13B	protein_coding	P-loop containing nucleoside triphosphate hydrolase	ADP ribosylation factor like GTPase 13B	ADP-RIBOSYLATION FACTOR-LIKE 13B; ARL13B;;ARL2-LIKE PROTEIN 1; ARL2L1	0.224226	3.9866	8.49381	0.00426678
ENSG00000152219	ARL14EP	protein_coding	ARF14 effector protein	ADP ribosylation factor like GTPase 14 effector protein	CHROMOSOME 11 OPEN READING FRAME 46; C11ORF46;;ADP-RIBOSYLATION FACTOR 7 EFFECTOR PROTEIN; ARF7EP	-0.661794	4.13521	90.1725	3.21025e-16
ENSG00000185305	ARL15	protein_coding		ADP ribosylation factor like GTPase 15		0.399725	3.35704	18.5474	3.45257e-05
ENSG00000214087	ARL16	protein_coding	Small GTPase superfamily, ARF/SAR type	ADP ribosylation factor like GTPase 16		-0.461062	4.25637	47.6402	2.76328e-10
ENSG00000185829	ARL17A	protein_coding	Small GTPase superfamily, ARF/SAR type	ADP ribosylation factor like GTPase 17B		0.51461	-0.257406	4.25689	0.0412916
ENSG00000228696	ARL17B	protein_coding	Small GTPase superfamily, ARF/SAR type	ADP-ribosylation factor-like protein 17		1.24161	-0.164091	34.6641	3.78823e-08
ENSG00000213465	ARL2	protein_coding	Small GTP-binding protein domain	ADP ribosylation factor like GTPase 2	ADP-RIBOSYLATION FACTOR-LIKE 2; ARL2	-0.864775	3.96537	74.8694	3.0443e-14
ENSG00000102931	ARL2BP	protein_coding	ADP-ribosylation factor-like 2-binding protein, domain	ADP ribosylation factor like GTPase 2 binding protein	ADP RIBOSYLATION FACTOR-LIKE 2-BINDING PROTEIN; ARL2BP;;ARL2-BINDING PROTEIN;;BINDER OF ARL2; BART	0.506074	5.98632	113.163	6.31441e-19
ENSG00000138175	ARL3	protein_coding	Small GTP-binding protein domain	ADP ribosylation factor like GTPase 3	ADP-RIBOSYLATION FACTOR-LIKE 3; ARL3;;ARFL3	0.465621	3.36297	40.8065	3.49312e-09
ENSG00000122644	ARL4A	protein_coding	Small GTP-binding protein domain	ADP ribosylation factor like GTPase 4A	ADP-RIBOSYLATION FACTOR-LIKE 4A; ARL4A;;ADP-RIBOSYLATION FACTOR-LIKE 4; ARL4	-1.01432	3.26983	114.31	4.70575e-19
ENSG00000162980	ARL5A	protein_coding	Small GTPase superfamily, ARF/SAR type	ADP ribosylation factor like GTPase 5A	ADP-RIBOSYLATION FACTOR-LIKE 5A; ARL5A;;ADP-RIBOSYLATION FACTOR-LIKE 5; ARL5	-0.873082	6.03903	95.0367	8.11523e-17
ENSG00000165997	ARL5B	protein_coding	Small GTP-binding protein domain	ADP ribosylation factor like GTPase 5B	ADP-RIBOSYLATION FACTOR-LIKE 5B; ARL5B;;ADP-RIBOSYLATION FACTOR-LIKE 8; ARL8	-0.148286	5.16556	2.97816	0.0870202
ENSG00000113966	ARL6	protein_coding	Small GTP-binding protein domain	ADP ribosylation factor like GTPase 6		-0.880244	1.57118	42.9837	1.5372e-09
ENSG00000170540	ARL6IP1	protein_coding	ADP-ribosylation factor-like protein 6-interacting protein 1	ADP ribosylation factor like GTPase 6 interacting protein 1	ADP-RIBOSYLATION-LIKE FACTOR 6-INTERACTING PROTEIN 1; ARL6IP1;;ARL6IP;;KIAA0069	0.604902	7.86109	74.1127	3.84946e-14
ENSG00000144746	ARL6IP5	protein_coding	Prenylated rab acceptor PRA1	ADP ribosylation factor like GTPase 6 interacting protein 5	ADP-RIBOSYLATION-LIKE FACTOR 6-INTERACTING PROTEIN 5; ARL6IP5;;PRA1 DOMAIN FAMILY, MEMBER 3; PRAF3;;GLUTAMATE TRANSPORTER EAAC1-ASSOCIATED PROTEIN;;GTRAP3-18;;JWA	0.613835	6.63449	141.209	7.04986e-22
ENSG00000177917	ARL6IP6	protein_coding	ADP-ribosylation factor-like protein 6-interacting protein 6	ADP ribosylation factor like GTPase 6 interacting protein 6	ADP-RIBOSYLATION FACTOR-LIKE 6-INTERACTING PROTEIN 6; ARL6IP6;;ARL6-INTERACTING PROTEIN 6; AIP6	0.0928936	5.73255	2.65876	0.105655
ENSG00000143862	ARL8A	protein_coding	Small GTP-binding protein domain	ADP ribosylation factor like GTPase 8A	ADP-RIBOSYLATION FACTOR-LIKE 8A; ARL8A;;SMALL G PROTEIN INDISPENSABLE FOR EQUAL CHROMOSOME SEGREGATION 2;GIE2	0.48624	5.53004	81.763	3.74667e-15
ENSG00000134108	ARL8B	protein_coding	Small GTP-binding protein domain	ADP ribosylation factor like GTPase 8B	ADP-RIBOSYLATION FACTOR-LIKE 8B; ARL8B;;SMALL G PROTEIN INDISPENSABLE FOR EQUAL CHROMOSOME SEGREGATION 1;GIE1	-0.105801	7.0479	3.50898	0.0635183
ENSG00000104442	ARMC1	protein_coding	Armadillo	armadillo repeat containing 1		-0.589536	6.01925	75.9527	2.17929e-14
ENSG00000170632	ARMC10	protein_coding	Armadillo repeat-containing domain	armadillo repeat containing 10	ARMADILLO REPEAT-CONTAINING 10; ARMC10;;SPLICING VARIANT INVOLVED IN HEPATOCARCINOGENESIS; SVH	-0.63869	5.42899	140.948	7.48253e-22
ENSG00000118690	ARMC2	protein_coding	Armadillo	armadillo repeat containing 2		0.0242215	1.03306	0.0271971	0.869293
ENSG00000140691	ARMC5	protein_coding	BTB/POZ domain	armadillo repeat containing 5	ARMADILLO REPEAT-CONTAINING PROTEIN 5; ARMC5	0.0708049	4.65834	0.484672	0.487687
ENSG00000105676	ARMC6	protein_coding	Armadillo	armadillo repeat containing 6		-1.46505	6.11929	254.292	3.47005e-31
ENSG00000125449	ARMC7	protein_coding		armadillo repeat containing 7		0.331828	4.85445	22.7229	5.40279e-06
ENSG00000114098	ARMC8	protein_coding	Armadillo	armadillo repeat containing 8		-0.03249	6.03479	0.460054	0.49893
ENSG00000135931	ARMC9	protein_coding	LIS1 homology motif	armadillo repeat containing 9		-1.9055	1.03791	131.787	6.33974e-21
ENSG00000125962	ARMCX5	protein_coding	Armadillo repeat-containing domain	armadillo repeat containing, X-linked 5		-0.372609	4.14443	31.1532	1.55281e-07
ENSG00000146476	ARMT1	protein_coding	Domain of unknown function DUF89	acidic residue methyltransferase 1	ACIDIC RESIDUE METHYLTRANSFERASE 1; ARMT1;;CHROMOSOME 6 OPEN READING FRAME 211; C6ORF211	-0.0569017	5.557	0.519634	0.472428
ENSG00000143437	ARNT	protein_coding	PAS domain	aryl hydrocarbon receptor nuclear translocator	ARYL HYDROCARBON RECEPTOR NUCLEAR TRANSLOCATOR; ARNT;;DIOXIN RECEPTOR, NUCLEAR TRANSLOCATOR;;HYPOXIA-INDUCIBLE FACTOR 1, BETA SUBUNIT; HIF1B;;HIF1-BETA;;TANGOARNT/TEL FUSION GENE, INCLUDED	0.517851	7.42552	256.824	2.32481e-31
ENSG00000133794	ARNTL	protein_coding		aryl hydrocarbon receptor nuclear translocator like	ARYL HYDROCARBON RECEPTOR NUCLEAR TRANSLOCATOR-LIKE PROTEIN; ARNTL;;BRAIN AND MUSCLE ARNT-LIKE PROTEIN 1; BMAL1;;TIC, MOUSE, HOMOLOG OF;;MEMBER OF PAS SUPERFAMILY 3; MOP3;;CYCLE, DROSOPHILA, HOMOLOG OF	0.894601	2.4314	32.1896	1.01995e-07
ENSG00000029153	ARNTL2	protein_coding	PAS domain	aryl hydrocarbon receptor nuclear translocator like 2	ARYL HYDROCARBON RECEPTOR NUCLEAR TRANSLOCATOR-LIKE PROTEIN 2; ARNTL2;;BRAIN AND MUSCLE ARNT-LIKE PROTEIN 2; BMAL2;;CYCLE-LIKE FACTOR; CLIF	-0.1515	5.22356	4.18288	0.0430645
ENSG00000241685	ARPC1A	protein_coding		actin related protein 2/3 complex subunit 1A	ACTIN-RELATED PROTEIN 2/3 COMPLEX, SUBUNIT 1A; ARPC1A;;SOP2-LIKE; SOP2L	-0.125567	5.3778	7.8671	0.00589169
ENSG00000130429	ARPC1B	protein_coding	WD40 repeat	actin related protein 2/3 complex subunit 1B	ACTIN-RELATED PROTEIN 2/3 COMPLEX, SUBUNIT 1B; ARPC1B;;ACTIN-RELATED PROTEIN 2/3 COMPLEX, 41-KD SUBUNIT; ARC41;;p41-ARC;;p40-ARC	0.903932	8.08013	148.633	1.32106e-22
ENSG00000163466	ARPC2	protein_coding	Actin-related protein 2/3 complex subunit 2	actin related protein 2/3 complex subunit 2	ACTIN-RELATED PROTEIN 2/3 COMPLEX, SUBUNIT 2; ARPC2;;ACTIN-RELATED PROTEIN 2/3 COMPLEX, 34-KD SUBUNIT; ARC34;;p34-ARC	-0.079789	8.88961	5.78037	0.0177665
ENSG00000111229	ARPC3	protein_coding	Actin-related protein 2/3 complex subunit 3	actin related protein 2/3 complex subunit 3	ACTIN-RELATED PROTEIN 2/3 COMPLEX, SUBUNIT 3; ARPC3;;ACTIN-RELATED PROTEIN 2/3 COMPLEX, 21-KD SUBUNIT; ARC21;;p21-ARC	0.362525	8.1029	55.4377	1.7459e-11
ENSG00000241553	ARPC4	protein_coding	Actin-related protein 2/3 complex subunit 4	actin related protein 2/3 complex subunit 4	ACTIN-RELATED PROTEIN 2/3 COMPLEX, SUBUNIT 4; ARPC4;;ACTIN-RELATED PROTEIN 2/3 COMPLEX, 20-KD SUBUNIT; ARC20;;p20-ARC	0.0654996	6.50581	1.30565	0.255503
ENSG00000162704	ARPC5	protein_coding	Actin-related protein 2/3 complex subunit 5	actin related protein 2/3 complex subunit 5	ACTIN-RELATED PROTEIN 2/3 COMPLEX, SUBUNIT 5; ARPC5;;ACTIN-RELATED PROTEIN 2/3 COMPLEX, 16-KD SUBUNIT; ARC16;;p16-ARC	0.801957	8.21575	184.124	8.04563e-26
ENSG00000136950	ARPC5L	protein_coding	Actin-related protein 2/3 complex subunit 5	actin related protein 2/3 complex subunit 5 like		-0.56604	5.40399	156.274	2.47457e-23
ENSG00000128989	ARPP19	protein_coding	Endosulphine	cAMP regulated phosphoprotein 19	CYCLIC AMP-REGULATED PHOSPHOPROTEIN, 19-KD; ARPP19;;cAMP-REGULATED PHOSPHOPROTEIN, 19-KDcAMP-REGULATED PHOSPHOPROTEIN, 16-KD, INCLUDED; ARPP16, INCLUDED	-0.292349	7.57165	17.4033	5.81354e-05
ENSG00000137486	ARRB1	protein_coding	Arrestin	arrestin beta 1	ARRESTIN, BETA, 1; ARRB1;;BETA-ARRESTIN 1; ARB1	0.642136	6.3224	124.256	3.90175e-20
ENSG00000141480	ARRB2	protein_coding	Arrestin	arrestin beta 2	ARRESTIN, BETA, 2; ARRB2;;BETA-ARRESTIN 2; ARB2;;BARR2	0.843659	6.81158	162.232	6.92431e-24
ENSG00000197070	ARRDC1	protein_coding	Arrestin-like, N-terminal	arrestin domain containing 1		0.47171	5.52507	23.7617	3.44227e-06
ENSG00000203993	ARRDC1-AS1	antisense				0.143303	2.57405	1.68923	0.196243
ENSG00000105643	ARRDC2	protein_coding	Arrestin-like, N-terminal	arrestin domain containing 2		0.0214929	5.65042	0.082625	0.774277
ENSG00000113369	ARRDC3	protein_coding	Arrestin-like, N-terminal	arrestin domain containing 3	ARRESTIN DOMAIN-CONTAINING 3; ARRDC3;;THIOREDOXIN-BINDING PROTEIN-2-LIKE INDUCIBLE MEMBRANE; TLIMP;;KIAA1376	1.01984	4.72468	73.9873	4.01971e-14
ENSG00000140450	ARRDC4	protein_coding	Arrestin-like, N-terminal	arrestin domain containing 4		-0.973056	4.05538	138.624	1.27745e-21
ENSG00000100299	ARSA	protein_coding	Alkaline-phosphatase-like, core domain	arylsulfatase A	ARYLSULFATASE A; ARSA;;CEREBROSIDE-SULFATASE;;CEREBROSIDE 3-SULFATASE	2.26111	4.95273	359.897	1.36307e-37
ENSG00000113273	ARSB	protein_coding	Sulfatase, N-terminal	arylsulfatase B	ARYLSULFATASE B; ARSB	-0.156647	5.83605	11.7463	0.000840676
ENSG00000006756	ARSD	protein_coding	Sulfatase, N-terminal	arylsulfatase D	ARYLSULFATASE D; ARSD	2.40555	1.45623	121.759	9.88543e-20
ENSG00000141337	ARSG	protein_coding	Sulfatase, N-terminal	arylsulfatase G	ARYLSULFATASE G; ARSG;;KIAA1001	0.610559	3.41914	50.7489	9.04102e-11
ENSG00000164291	ARSK	protein_coding	Sulfatase, N-terminal	arylsulfatase family member K	ARYLSULFATASE K; ARSK	-0.0729483	0.782496	0.284523	0.594758
ENSG00000173409	ARV1	protein_coding	Arv1 protein	ARV1 homolog, fatty acid homeostasis modulator	ARV1, S. CEREVISIAE, HOMOLOG OF; ARV1	-0.472138	3.64807	44.8068	7.802e-10
ENSG00000099889	ARVCF	protein_coding	Armadillo	armadillo repeat gene deleted in velocardiofacial syndrome	ARMADILLO REPEAT GENE DELETED IN VCFS; ARVCF	-0.300305	2.26211	4.56387	0.0347248
ENSG00000104763	ASAH1	protein_coding		N-acylsphingosine amidohydrolase 1	N-ACYLSPHINGOSINE AMIDOHYDROLASE 1; ASAH1;;ASAH;;N-ACYLSPHINGOSINE DEACYLASE;;ACID CERAMIDASE; AC;;ACID CDase;;ACDase	0.427232	6.91137	63.356	1.20459e-12
ENSG00000204147	ASAH2B	protein_coding	Neutral/alkaline nonlysosomal ceramidase	N-acylsphingosine amidohydrolase 2B		-0.986903	-0.644822	12.0748	0.00075814
ENSG00000153317	ASAP1	protein_coding	Arf GTPase activating protein	ArfGAP with SH3 domain, ankyrin repeat and PH domain 1		1.09231	6.62983	361.329	1.14245e-37
ENSG00000065802	ASB1	protein_coding	SOCS box domain	ankyrin repeat and SOCS box containing 1	ANKYRIN REPEAT- AND SOCS BOX-CONTAINING PROTEIN 1; ASB1	0.16044	5.18915	9.57071	0.00247013
ENSG00000198881	ASB12	protein_coding	SOCS box domain	ankyrin repeat and SOCS box containing 12	ANKYRIN REPEAT- AND SOCS BOX-CONTAINING PROTEIN 12; ASB12	0.289327	0.143122	1.45041	0.23088
ENSG00000196372	ASB13	protein_coding	SOCS box domain	ankyrin repeat and SOCS box containing 13	ANKYRIN REPEAT- AND SOCS BOX-CONTAINING PROTEIN 13; ASB13	-0.683208	4.37902	82.7464	2.7958e-15
ENSG00000267080	ASB16-AS1	antisense				1.61135	2.36575	122.659	5.77847e-20
ENSG00000100628	ASB2	protein_coding	SOCS box domain	ankyrin repeat and SOCS box containing 2	ANKYRIN REPEAT- AND SOCS BOX-CONTAINING PROTEIN 2; ASB2	0.903743	0.423481	13.5094	0.000358916
ENSG00000115239	ASB3	protein_coding	Ankyrin repeat	ankyrin repeat and SOCS box containing 3	ANKYRIN REPEAT- AND SOCS BOX-CONTAINING PROTEIN 3; ASB3	0.0185802	0.745577	0.00952237	0.92243
ENSG00000148331	ASB6	protein_coding	Ankyrin repeat	ankyrin repeat and SOCS box containing 6	ANKYRIN REPEAT- AND SOCS BOX-CONTAINING PROTEIN 6; ASB6	-0.254631	5.25083	13.2001	0.00041618
ENSG00000183475	ASB7	protein_coding	SOCS box domain	ankyrin repeat and SOCS box containing 7	ANKYRIN REPEAT- AND SOCS BOX-CONTAINING PROTEIN 7; ASB7	0.122913	5.26822	5.76475	0.0179175
ENSG00000177981	ASB8	protein_coding	SOCS box domain	ankyrin repeat and SOCS box containing 8	ANKYRIN REPEAT- AND SOCS BOX-CONTAINING PROTEIN 8; ASB8	0.190403	5.39808	19.7609	1.99909e-05
ENSG00000138303	ASCC1	protein_coding	K Homology domain, type 1	activating signal cointegrator 1 complex subunit 1	ACTIVATING SIGNAL COINTEGRATOR 1 COMPLEX, SUBUNIT 1; ASCC1;;ASC1 COMPLEX, 50-KD SUBUNIT;;p50	-0.289987	4.31356	24.332	2.69211e-06
ENSG00000100325	ASCC2	protein_coding	Ubiquitin system component Cue	activating signal cointegrator 1 complex subunit 2		-0.00948979	6.0512	0.0255335	0.873319
ENSG00000112249	ASCC3	protein_coding	C2 domain	activating signal cointegrator 1 complex subunit 3	ACTIVATING SIGNAL COINTEGRATOR 1 COMPLEX, SUBUNIT 3; ASCC3;;ASC1 COMPLEX SUBUNIT, 200-KD SUBUNIT;;p200	-0.402594	6.66197	48.2653	2.2033e-10
ENSG00000183734	ASCL2	protein_coding	Myc-type, basic helix-loop-helix (bHLH) domain	achaete-scute family bHLH transcription factor 2	ACHAETE-SCUTE COMPLEX, DROSOPHILA, HOMOLOG OF, 2; ASCL2;;ACHAETE-SCUTE HOMOLOG 2; ASH2; HASH2	-0.862543	1.79862	7.03625	0.00909007
ENSG00000111875	ASF1A	protein_coding	Histone chaperone ASF1-like	anti-silencing function 1A histone chaperone	ANTI-SILENCING FUNCTION 1, S. CEREVISIAE, HOMOLOG OF, A; ASF1A;;CCG1-INTERACTING FACTOR A; CIA	-0.548138	5.46763	61.9618	1.91161e-12
ENSG00000105011	ASF1B	protein_coding	Histone chaperone ASF1-like	anti-silencing function 1B histone chaperone	ANTI-SILENCING FUNCTION 1, S. CEREVISIAE, HOMOLOG OF, B; ASF1B	0.430087	6.43345	51.879	6.05579e-11
ENSG00000116539	ASH1L	protein_coding	Bromo adjacent homology (BAH) domain	microRNA 555	ASH1-LIKE; ASH1L;;ASH1, DROSOPHILA, HOMOLOG OF; ASH1;;LYSINE-SPECIFIC METHYLTRANSFERASE 2H; KMT2H;;KIAA1420	0.751727	7.03865	157.826	1.77103e-23
ENSG00000235919	ASH1L-AS1	antisense				1.14203	0.27503	21.7709	8.19598e-06
ENSG00000129691	ASH2L	protein_coding	B30.2/SPRY domain	ASH2 like histone lysine methyltransferase complex subunit	ASH2-LIKE; ASH2L;;ASH2;;DROSOPHILA ASH2-LIKE;;DROSOPHILA ABSENT, SMALL, OR HOMEOTIC DISCS 2-LIKE;;ASH2L1;;ASH2L2	0.23301	6.55865	37.3452	1.32143e-08
ENSG00000110881	ASIC1	protein_coding	Na+ channel, amiloride-sensitive	acid sensing ion channel subunit 1	CATION CHANNEL, AMILORIDE-SENSITIVE, NEURONAL, 2; ACCN2;;BRAIN SODIUM CHANNEL 2; BNAC2;;ACID-SENSING ION CHANNEL; ASIC;;ASIC1	-1.63861	4.46824	473.788	4.53838e-43
ENSG00000213199	ASIC3	protein_coding	Na+ channel, amiloride-sensitive	acid sensing ion channel subunit 3	CATION CHANNEL, AMILORIDE-SENSITIVE, NEURONAL 3; ACCN3;;ACID-SENSING ION CHANNEL 3; ASIC3;;TESTIS SODIUM CHANNEL 1; TNAC1;;DORSAL ROOT ACID-SENSING ION CHANNEL; DRASIC	2.45912	0.110677	34.7719	3.62965e-08
ENSG00000126522	ASL	protein_coding	Fumarate lyase family	argininosuccinate lyase	ARGININOSUCCINATE LYASE; ASL;;ARGININOSUCCINASE	0.432894	4.43114	26.2403	1.1929e-06
ENSG00000169093	ASMTL	protein_coding	O-methyltransferase, family 2	acetylserotonin O-methyltransferase-like	ACETYLSEROTONIN METHYLTRANSFERASE-LIKE, Y-LINKED;;ASMTLY	-0.0777366	4.33562	0.906325	0.343043
ENSG00000236017	ASMTL-AS1	antisense				2.8726	-0.447668	22.7824	5.26445e-06
ENSG00000198356	ASNA1	protein_coding	Arsenical pump ATPase, ArsA/GET3	arsA arsenite transporter, ATP-binding, homolog 1 (bacterial)	arsA ARSENITE TRANSPORTER, ATP-BINDING, E. COLI, HOMOLOG OF, 1; ASNA1;;ARSA1;;TRANSMEMBRANE DOMAIN RECOGNITION COMPLEX, 40-KD; TRC40	-0.732917	5.72813	114.977	3.96828e-19
ENSG00000070669	ASNS	protein_coding	Asparagine synthase	asparagine synthetase (glutamine-hydrolyzing)	ASPARAGINE SYNTHETASE; ASNS;;HUMAN COMPLEMENT FOR HAMSTER TEMPERATURE-SENSITIVE MUTANT ts11	-1.29777	6.70377	116.386	3.59145e-19
ENSG00000138381	ASNSD1	protein_coding	Asparagine synthase	asparagine synthetase domain containing 1		-0.617119	5.76088	88.1353	5.76667e-16
ENSG00000198363	ASPH	protein_coding	Aspartyl/asparaginy/proline hydroxylase	aspartate beta-hydroxylase		-0.39519	4.45783	21.3028	1.00728e-05
ENSG00000174939	ASPHD1	protein_coding	Aspartyl/asparaginy/proline hydroxylase	aspartate beta-hydroxylase domain containing 1		-0.697424	1.89949	29.3669	3.22947e-07
ENSG00000128203	ASPHD2	protein_coding	Aspartyl/asparaginy/proline hydroxylase	aspartate beta-hydroxylase domain containing 2		0.607671	2.39061	36.5324	1.81455e-08
ENSG00000066279	ASPM	protein_coding	IQ motif, EF-hand binding site	abnormal spindle microtubule assembly	ABNORMAL SPINDLE-LIKE, MICROCEPHALY-ASSOCIATED; ASPM;;ASP, DROSOPHILA, HOMOLOG OF;;MCPH5 GENE	0.478967	7.53564	26.3147	1.15692e-06
ENSG00000244617	ASPRV1	protein_coding	Aspartic peptidase, active site	aspartic peptidase, retroviral-like 1	ASPARTIC PEPTIDASE, RETROVIRAL-LIKE 1; ASPRV1;;SKIN ASPARTIC PROTEASE; SASP;;SASPase;;TPA-INDUCIBLE ASPARTIC PROTEINASE; TAPS;;MUNO	0.449775	1.11582	6.19921	0.0141775
ENSG00000169696	ASPSCR1	protein_coding	TUG ubiquitin-like domain	ASPSCR1, UBX domain containing tether for SLC2A4	ALVEOLAR SOFT PART SARCOMA CHROMOSOME REGION, CANDIDATE 1; ASPSCR1;;ASPL;;TETHER, CONTAINING UBX DOMAIN FOR GLUT4; TUGASPSCR1/TFE3 FUSION GENE, INCLUDED	-0.216934	4.95634	6.03554	0.0154802
ENSG00000162174	ASRGL1	protein_coding	Peptidase T2, asparaginase 2	asparaginase like 1	ASPARAGINASE-LIKE PROTEIN 1; ASRGL1;;ALP	0.258774	4.75185	18.2575	3.93772e-05
ENSG00000130707	ASS1	protein_coding	Argininosuccinate synthase	argininosuccinate synthase 1		-2.97923	7.51161	525.382	1.27257e-44
ENSG00000034533	ASTE1	protein_coding	XPG N-terminal	asteroid homolog 1 (Drosophila)		-0.0558238	3.04363	0.793913	0.374738
ENSG00000064102	ASUN	protein_coding	Cell cycle regulator Mat89Bb	asunder, spermatogenesis regulator	ASUNDER, SPERMATOGENESIS REGULATOR; ASUN;;ASUNDER, DROSOPHILA, HOMOLOG OF;;MAT89BB, DROSOPHILA, HOMOLOG OF; MAT89BB;;GERM CELL TUMOR 1; GCT1	-1.67946	6.44263	791.221	4.5957e-54
ENSG00000171456	ASXL1	protein_coding	HB1/Asxl, restriction endonuclease HTH domain	additional sex combs like 1, transcriptional regulator		-0.157498	7.16327	18.3245	3.81966e-05
ENSG00000143970	ASXL2	protein_coding	HB1/Asxl, restriction endonuclease HTH domain	additional sex combs like 2, transcriptional regulator		0.165348	7.07055	12.8566	0.00049083
ENSG00000138138	ATAD1	protein_coding	AAA+ ATPase domain	ATPase family, AAA domain containing 1	ATPASE FAMILY, AAA DOMAIN-CONTAINING, MEMBER 1; ATAD1;;THORASE	-0.365732	6.44748	46.0733	4.89421e-10
ENSG00000156802	ATAD2	protein_coding		ATPase family, AAA domain containing 2	ATPase FAMILY, AAA DOMAIN-CONTAINING, MEMBER 2; ATAD2;;AAA NUCLEAR COREGULATOR, CANCER-ASSOCIATED; ANCCA	0.18927	7.89412	7.73362	0.00631385
ENSG00000119778	ATAD2B	protein_coding	Bromodomain	ATPase family, AAA domain containing 2B	ATPase FAMILY, AAA DOMAIN-CONTAINING, MEMBER 2B; ATAD2B;;KIAA1240	0.741621	5.61139	138.68	1.26092e-21
ENSG00000197785	ATAD3A	protein_coding	AAA+ ATPase domain	ATPase family, AAA domain containing 3A	ATPase FAMILY, AAA DOMAIN-CONTAINING, MEMBER 3A; ATAD3A	-1.47677	6.66896	227.77	2.85567e-29
ENSG00000160072	ATAD3B	protein_coding	AAA+ ATPase domain	ATPase family, AAA domain containing 3B	ATPase FAMILY, AAA DOMAIN-CONTAINING, MEMBER 3B; ATAD3B;;TOB3;;AAA-TOB3;;KIAA1273	-1.6013	5.49779	265.593	5.92609e-32
ENSG00000176208	ATAD5	protein_coding	ATPase, AAA-type, core	ATPase family, AAA domain containing 5	ATPase FAMILY, AAA DOMAIN-CONTAINING, MEMBER 5; ATAD5;;CHROMOSOME 17 OPEN READING FRAME 41; C17ORF41;;FRAG1;;ENHANCED LEVEL OF GENOMIC INSTABILITY 1; ELG1;;FLJ12735	-0.0170288	5.50238	0.037597	0.846589
ENSG00000137343	ATAT1	protein_coding	Gcn5-related N-acetyltransferase (GNAT) domain, ATAT-type	alpha tubulin acetyltransferase 1	ALPHA-TUBULIN ACETYLTRANSFERASE 1; ATAT1;;TUBULIN, ALPHA, ACETYLTRANSFERASE 1;;ALPHA-TAT1;;MEC17, C. ELEGANS, HOMOLOG OF; MEC17;;CHROMOSOME 6 OPEN READING FRAME 134; C6ORF134	-0.159458	2.29098	2.62958	0.107566
ENSG00000107669	ATE1	protein_coding	Arginine-tRNA-protein transferase, N-terminal	arginyltransferase 1	ARGINYLTRANSFERASE 1; ATE1	-0.444965	5.63269	51.5101	6.90011e-11
ENSG00000123268	ATF1	protein_coding	cAMP response element binding (CREB) protein	activating transcription factor 1	ACTIVATING TRANSCRIPTION FACTOR 1; ATF1;;cAMP-DEPENDENT TRANSCRIPTION FACTOR 1ATF1/EWS FUSION GENE, INCLUDED;;ATF1/FUS FUSION GENE, INCLUDED	-0.442548	5.6955	50.0459	1.16173e-10
ENSG00000115966	ATF2	protein_coding	Basic-leucine zipper domain	activating transcription factor 2	ACTIVATING TRANSCRIPTION FACTOR 2; ATF2;;CREBP1;;cAMP RESPONSE ELEMENT-BINDING PROTEIN 2, FORMERLY; CREB2, FORMERLY	0.15573	6.48687	7.98036	0.00555645
ENSG00000162772	ATF3	protein_coding	AP-1 transcription factor	activating transcription factor 3	ACTIVATING TRANSCRIPTION FACTOR 3; ATF3	-0.0199699	4.62669	0.0339567	0.854116
ENSG00000128272	ATF4	protein_coding	Basic-leucine zipper domain	activating transcription factor 4	ACTIVATING TRANSCRIPTION FACTOR 4; ATF4;;CYCLIC AMP RESPONSE ELEMENT-BINDING PROTEIN 2; CREB2;;TAX-RESPONSIVE ENHANCER ELEMENT B67; TAXREB67	-0.394277	9.50602	70.4317	1.22219e-13
ENSG00000169136	ATF5	protein_coding	Basic-leucine zipper domain	microRNA 4751	ACTIVATING TRANSCRIPTION FACTOR 5; ATF5;;ATFX	-0.726087	8.53246	40.4823	4.16525e-09
ENSG00000118217	ATF6	protein_coding	Basic-leucine zipper domain	activating transcription factor 6	ACTIVATING TRANSCRIPTION FACTOR 6; ATF6;;ACTIVATING TRANSCRIPTION FACTOR 6, ALPHA; ATF6A	-0.322276	7.06155	53.934	2.94325e-11
ENSG00000213676	ATF6B	protein_coding	Basic-leucine zipper domain	activating transcription factor 6 beta	ACTIVATING TRANSCRIPTION FACTOR 6, BETA; ATF6B;;cAMP RESPONSE ELEMENT-BINDING PROTEIN-LIKE 1; CREBL1;;CREB-RELATED PROTEIN; CREBRP	0.767857	7.44334	109.684	1.55506e-18
ENSG00000170653	ATF7	protein_coding	Basic-leucine zipper domain	activating transcription factor 7	ACTIVATING TRANSCRIPTION FACTOR 7; ATF7;;ATFA	0.474046	5.51539	78.9336	8.77225e-15
ENSG00000171681	ATF7IP	protein_coding	Activating transcription factor 7-interacting protein	activating transcription factor 7 interacting protein	ACTIVATING TRANSCRIPTION FACTOR 7-INTERACTING PROTEIN; ATF7IP;;ATF7-INTERACTING PROTEIN;;ATFA MODULATOR, MOUSE, HOMOLOG OF; AM;;MBD1-CONTAINING CHROMATIN-ASSOCIATED FACTOR; MCAF;;MCAF1	0.27484	6.89463	23.7365	3.47989e-06
ENSG00000166669	ATF7IP2	protein_coding		activating transcription factor 7 interacting protein 2	ACTIVATING TRANSCRIPTION FACTOR 7-INTERACTING PROTEIN 2; ATF7IP2;;ATF7-INTERACTING PROTEIN 2;;MBD1-CONTAINING CHROMATIN-ASSOCIATED FACTOR 2; MCAF2	-0.0189502	3.61929	0.042288	0.837427
ENSG00000152348	ATG10	protein_coding		autophagy related 10	AUTOPHAGY 10, S. CEREVISIAE, HOMOLOG OF; ATG10;;APG10, S. CEREVISIAE, HOMOLOG OF; APG10	0.257661	2.04267	5.82006	0.0173889
ENSG00000123395	ATG101	protein_coding	Autophagy-related protein 1010	autophagy related 101	AUTOPHAGY-RELATED PROTEIN 101; ATG101;;CHROMOSOME 12 OPEN READING FRAME 44; C12ORF44	-0.203196	5.12532	8.50919	0.00423332
ENSG00000145782	ATG12	protein_coding	Ubiquitin-like protein Atg12	autophagy related 12	AUTOPHAGY 12, S. CEREVISIAE, HOMOLOG OF; ATG12;;APG12, S. CEREVISIAE, HOMOLOG OF; APG12;;AGP12-LIKE; APG12L;;FBR93	0.137137	4.75958	3.8303	0.0527023
ENSG00000175224	ATG13	protein_coding		autophagy related 13	AUTOPHAGY 13, S. CEREVISIAE, HOMOLOG OF; ATG13;;KIAA0652;;PARAPROTEIN TARGET 8; PARATARG8;;PARATARG 8	-0.123932	7.17559	10.1932	0.00180847
ENSG00000126775	ATG14	protein_coding	UV radiation resistance protein/autophagy-related protein 14	autophagy related 14	AUTOPHAGY 14, S. CEREVISIAE, HOMOLOG OF; ATG14;;YEAST ATG14-LIKE; ATG14L;;KIAA0831;;BECN1-INTERACTING PROTEIN;;BECN1-ASSOCIATED AUTOPHAGY-RELATED KEY REGULATOR; BARKOR	0.219291	4.00941	9.04823	0.00321644
ENSG00000085978	ATG16L1	protein_coding	Autophagy-related protein 16	autophagy related 16 like 1	AUTOPHAGY 16-LIKE 1; ATG16L1;;APG16-LIKE; APG16L	0.264902	5.08415	34.2151	4.52801e-08
ENSG00000168010	ATG16L2	protein_coding	WD40 repeat	autophagy related 16 like 2		2.3009	6.02945	252.439	8.67707e-31
ENSG00000110046	ATG2A	protein_coding	Autophagy-related, C-terminal	autophagy related 2A	AUTOPHAGY 2, S. CEREVISIAE, HOMOLOG OF, A; ATG2A;;KIAA0404	0.105666	6.17494	1.57663	0.211735
ENSG00000066739	ATG2B	protein_coding	Autophagy-related, C-terminal	autophagy related 2B	AUTOPHAGY 2, S. CEREVISIAE, HOMOLOG OF, B; ATG2B	-0.198024	5.67274	13.7799	0.00031549
ENSG00000144848	ATG3	protein_coding	Autophagy-related protein 3, N-terminal	autophagy related 3	AUTOPHAGY 3, S. CEREVISIAE, HOMOLOG OF; ATG3;;APG3, S. CEREVISIAE, HOMOLOG OF; APG3;;APG3-LIKE; APG3L	-0.734742	6.19295	383.606	7.82208e-39
ENSG00000101844	ATG4A	protein_coding	Peptidase C54	autophagy related 4A cysteine peptidase	AUTOPHAGY 4, S. CEREVISIAE, HOMOLOG OF, A; ATG4A;;APG4, S. CEREVISIAE, HOMOLOG OF, A; APG4A;;AUTOPHAGIN 2;;AUTL2	0.292856	3.35586	11.1187	0.00114347
ENSG00000168397	ATG4B	protein_coding	Peptidase C54	autophagy related 4B cysteine peptidase	AUTOPHAGY 4, S. CEREVISIAE, HOMOLOG OF, B; ATG4B;;APG4, S. CEREVISIAE, HOMOLOG OF, B; APG4B;;AUTOPHAGIN 1;;AUTL1;;KIAA0943	-0.0198671	6.05515	0.113601	0.736681
ENSG00000125703	ATG4C	protein_coding	Peptidase C54	autophagy related 4C cysteine peptidase	AUTOPHAGY 4, S. CEREVISIAE, HOMOLOG OF, C; ATG4C;;APG4, S. CEREVISIAE, HOMOLOG OF, C; APG4C;;AUTOPHAGIN 3;;AUTL3	-0.0918572	4.79753	1.00125	0.319061
ENSG00000130734	ATG4D	protein_coding	Peptidase C54	autophagy related 4D cysteine peptidase	AUTOPHAGY 4, S. CEREVISIAE, HOMOLOG OF, D; ATG4D;;APG4, S. CEREVISIAE, HOMOLOG OF, D; APG4D;;AUTOPHAGIN 4;;AUTL4	0.0470326	4.72702	0.321156	0.571994
ENSG00000057663	ATG5	protein_coding	Autophagy-related protein 5	autophagy related 5	AUTOPHAGY 5, S. CEREVISIAE, HOMOLOG OF; ATG5;;APG5, S. CEREVISIAE, HOMOLOG OF; APG5;;APG5-LIKE; APG5L;;APOPTOSIS-SPECIFIC PROTEIN; ASP	-0.269195	4.36397	12.8082	0.000502401
ENSG00000197548	ATG7	protein_coding	Ubiquitin-like modifier-activating enzyme Atg7, N-terminal	autophagy related 7	AUTOPHAGY 7, S. CEREVISIAE, HOMOLOG OF; ATG7;;APG7, S. CEREVISIAE, HOMOLOG OF, APG7;;APG7-LIKE; APG7L;;GSA7	0.186253	5.51013	21.1091	1.0973e-05
ENSG00000198925	ATG9A	protein_coding	Autophagy-related protein 9	autophagy related 9A	AUTOPHAGY 9, S. CEREVISIAE, HOMOLOG OF, A; ATG9A;;APG9-LIKE 1; APG9L1	-0.234646	6.07555	11.9543	0.000759645
ENSG00000181652	ATG9B	protein_coding	Autophagy-related protein 9	autophagy related 9B	AUTOPHAGY 9, S. CEREVISIAE, HOMOLOG OF, B; ATG9B;;ENDOTHELIAL NITRIC OXIDE SYNTHASE 3 ANTISENSE; NOS3AS;;APG9-LIKE 2; APG9L2SONE, INCLUDED	-1.29558	-0.0864038	21.2475	1.03219e-05
ENSG00000138363	ATIC	protein_coding	AICARFT/IMPCHase bienzyme	5-aminoimidazole-4-carboxamide ribonucleotide formyltransferase/IMP cyclohydrolase	5-@AMINOIMIDAZOLE-4-CARBOXAMIDE RIBONUCLEOTIDE FORMYLTRANSFERASE/IMPCYCLOHYDROLASE; ATIC;;AICARFT/IMPCHASE;;AICAR TRANSFORMYLASE/IMP CYCLOHYDROLASE;;PURH	-1.44007	7.20948	560.102	1.47887e-46
ENSG00000198513	ATL1	protein_coding	Guanylate-binding protein, C-terminal	atlastin GTPase 1	ATLASTIN GTPase 1; ATL1;;ATLASTIN;;SPG3A GENE; SPG3A	0.293506	-0.33296	1.17339	0.280921
ENSG00000119787	ATL2	protein_coding	Guanylate-binding protein, C-terminal	atlastin GTPase 2	ATLASTIN GTPase 2; ATL2;;ADP-RIBOSYLATION-LIKE FACTOR 6-INTERACTING PROTEIN 2; ARL6IP2;;ARL6-INTERACTING PROTEIN 2	-0.303759	6.32184	23.5298	3.80536e-06
ENSG00000184743	ATL3	protein_coding	Guanylate-binding protein, C-terminal	atlastin GTPase 3	ATLASTIN GTPase 3; ATL3	0.13269	6.54542	3.13752	0.079099
ENSG00000149311	ATM	protein_coding	Serine/threonine-protein kinase ATM	ATM serine/threonine kinase		0.998001	7.14258	136.194	2.24629e-21
ENSG00000166454	ATMIN	protein_coding	Zinc finger, C2H2	ATM interactor	ATM INTERACTOR; ATMIN;;ATM SUBSTRATE CHK2-INTERACTING ZINC FINGER PROTEIN; ASCIZ;;KIAA0431	0.010284	6.61865	0.0485661	0.825959
ENSG00000111676	ATN1	protein_coding	Atrophin-like	atrophin 1	ATROPHIN 1; ATN1;;DRPLA GENE; DRPLA	0.315325	6.96883	13.9744	0.000287616
ENSG00000168874	ATOH8	protein_coding	Myc-type, basic helix-loop-helix (bHLH) domain	atonal bHLH transcription factor 8		2.97051	1.26378	179.241	2.11118e-25
ENSG00000177556	ATOX1	protein_coding	Heavy metal-associated domain, HMA	antioxidant 1 copper chaperone	ANTIOXIDANT PROTEIN 1; ATOX1;;ATX, YEAST, HOMOLOG OF, 1; HAH1	-0.747743	4.28316	95.1307	7.90498e-17
ENSG00000145246	ATP10D	protein_coding	P-type ATPase	ATPase phospholipid transporting 10D (putative)		1.35738	4.65714	228.753	2.3179e-29
ENSG00000068650	ATP11A	protein_coding	P-type ATPase	ATPase phospholipid transporting 11A		0.611768	8.04936	89.8748	3.49577e-16
ENSG00000058063	ATP11B	protein_coding	P-type ATPase	ATPase phospholipid transporting 11B (putative)	ATPase, CLASS VI, TYPE 11B; ATP11B;;ATPIR	0.174095	7.97408	7.67597	0.00650575
ENSG00000101974	ATP11C	protein_coding	P-type ATPase	ATPase phospholipid transporting 11C	ATPase, CLASS VI, TYPE 11C; ATP11C;;ATPase IQ; ATPIQ;;ATPase IG; ATPIG	-0.544458	5.82142	77.1432	1.51259e-14
ENSG00000105726	ATP13A1	protein_coding	P-type ATPase	ATPase 13A1		-0.253608	6.97609	10.5233	0.00153466
ENSG00000159363	ATP13A2	protein_coding	P-type ATPase	ATPase 13A2	ATPase, TYPE 13A2; ATP13A2	-0.712202	3.84792	60.2236	3.41765e-12
ENSG00000133657	ATP13A3	protein_coding	P-type ATPase	ATPase 13A3	ATPase, TYPE 13A3; ATP13A3;;ATPase FAMILY HOMOLOG UPREGULATED IN SENESCENCE CELLS; AFURS1	-0.622776	8.32086	90.7783	2.70005e-16
ENSG00000163399	ATP1A1	protein_coding	Cation-transporting P-type ATPase, N-terminal	ATPase Na+/K+ transporting subunit alpha 1	ATPase, Na+/K+ TRANSPORTING, ALPHA-1 POLYPEPTIDE; ATP1A1;;SODIUM-POTASSIUM-ATPase, ALPHA-1 POLYPEPTIDE;;Na,K-ATPase, ALPHA-A CATALYTIC POLYPEPTIDE	-0.47781	9.50618	255.261	2.97584e-31
ENSG00000203865	ATP1A1-AS1	processed_transcript				0.774183	0.552306	14.625	0.000211385
ENSG00000143153	ATP1B1	protein_coding	Sodium/potassium-transporting ATPase subunit beta	ATPase Na+/K+ transporting subunit beta 1	ATPase, Na+/K+ TRANSPORTING, BETA-1 POLYPEPTIDE; ATP1B1;;Na,K-ATPase BETA-1 POLYPEPTIDE	0.468479	1.74006	11.4486	0.000972454
ENSG00000069849	ATP1B3	protein_coding	Sodium/potassium-transporting ATPase subunit beta	ATPase Na+/K+ transporting subunit beta 3	ATPase, Na+/K+ TRANSPORTING, BETA-3 POLYPEPTIDE; ATP1B3;;Na,K-ATPase BETA-3 POLYPEPTIDE	-0.691856	7.02629	169.397	1.55183e-24
ENSG00000166896	ATP23	protein_coding	Peptidase M76, ATP23	ATP23 metallopeptidase and ATP synthase assembly factor homolog		-1.12743	4.17128	291.872	1.1815e-33
ENSG00000196296	ATP2A1	protein_coding	P-type ATPase	ATPase sarcoplasmic/endoplasmic reticulum Ca2+ transporting 1	ATPase, Ca(2+)-TRANSPORTING, FAST-TWITCH 1; ATP2A1;;SARCOPLASMIC RETICULUM Ca(2+)-ATPase 1; SERCA1SERCA1 TRUNCATED ISOFORM, INCLUDED; S1T, INCLUDED	1.30293	2.73495	82.4613	3.04298e-15
ENSG00000174437	ATP2A2	protein_coding		ATPase sarcoplasmic/endoplasmic reticulum Ca2+ transporting 2		-0.402205	8.78726	145.645	2.57712e-22
ENSG00000074370	ATP2A3	protein_coding	P-type ATPase	ATPase sarcoplasmic/endoplasmic reticulum Ca2+ transporting 3	ATPase, Ca(2+)-TRANSPORTING, UBIQUITOUS; ATP2A3;;SARCOPLASMIC RETICULUM Ca(2+)-ATPase 3; SERCA3	0.390058	8.44108	23.934	3.19553e-06
ENSG00000070961	ATP2B1	protein_coding	P-type ATPase	ATPase plasma membrane Ca2+ transporting 1		0.969093	6.91927	202.528	2.42927e-27
ENSG00000067842	ATP2B3	protein_coding	P-type ATPase	ATPase plasma membrane Ca2+ transporting 3	ATPase, Ca(2+)-TRANSPORTING, PLASMA MEMBRANE, 3; ATP2B3;;PLASMA MEMBRANE Ca(2+)-ATPase, TYPE 3; PMCA3	4.02741	-1.63941	15.7169	0.000132033
ENSG00000058668	ATP2B4	protein_coding	P-type ATPase	ATPase plasma membrane Ca2+ transporting 4	ATPase, Ca(2+)-TRANSPORTING, PLASMA MEMBRANE, 4; ATP2B4;;PLASMA MEMBRANE Ca(2+)-ATPase, TYPE 4; PMCA4;;ATP2B2, FORMERLY	0.75495	7.6445	104.37	6.33092e-18
ENSG00000017260	ATP2C1	protein_coding	P-type ATPase	ATPase secretory pathway Ca2+ transporting 1		-0.144343	6.95984	9.45036	0.0026245
ENSG00000152234	ATP5A1	protein_coding	ATPase, F1/V1/A1 complex, alpha/beta subunit, nucleotide-binding domain	ATP synthase, H+ transporting, mitochondrial F1 complex, alpha subunit 1, cardiac muscle	ATP SYNTHASE, H+ TRANSPORTING, MITOCHONDRIAL F1 COMPLEX, ALPHA SUBUNIT1; ATP5A1;;ATP5A;;MITOCHONDRIAL ATP SYNTHETASE; ATPM;;MITOCHONDRIAL ATP SYNTHETASE, OLIGOMYCIN-RESISTANT; OMR;;MODIFIER OF MIN 2, MOUSE, HOMOLOG OF; MOM2	-0.670599	10.0394	286.673	2.51182e-33
ENSG00000110955	ATP5B	protein_coding	ATPase, F1/V1/A1 complex, alpha/beta subunit, nucleotide-binding domain	ATP synthase, H+ transporting, mitochondrial F1 complex, beta polypeptide	ATP SYNTHASE, H+ TRANSPORTING, MITOCHONDRIAL F1 COMPLEX, BETA SUBUNIT;ATP5B;;MITOCHONDRIAL ATP SYNTHASE, BETA SUBUNIT; ATPMB;;ATPSB	-0.712086	9.97291	363.558	8.68746e-38
ENSG00000165629	ATP5C1	protein_coding	ATPase, F1 complex, gamma subunit	ATP synthase, H+ transporting, mitochondrial F1 complex, gamma polypeptide 1	ATP SYNTHASE, H+ TRANSPORTING, MITOCHONDRIAL F1 COMPLEX, GAMMA SUBUNIT1; ATP5C1;;ATP5C;;MITOCHONDRIAL ATP SYNTHASE, GAMMA SUBUNIT 1	-0.540019	5.96582	82.7154	2.82164e-15
ENSG00000224004	ATP5C1P1	processed_pseudogene				-0.553411	3.00929	60.6464	2.9656e-12
ENSG00000099624	ATP5D	protein_coding	ATPase, F1 complex, delta/epsilon subunit	ATP synthase, H+ transporting, mitochondrial F1 complex, delta subunit	ATP SYNTHASE, H+ TRANSPORTING, MITOCHONDRIAL F1 COMPLEX, DELTA SUBUNIT;ATP5D;;MITOCHONDRIAL ATP SYNTHASE, DELTA SUBUNIT	-1.35803	6.4816	168.957	2.00719e-24
ENSG00000124172	ATP5E	protein_coding	ATPase, F1 complex, epsilon subunit, mitochondrial	ATP synthase, H+ transporting, mitochondrial F1 complex, epsilon subunit	ATP SYNTHASE, H+ TRANSPORTING, MITOCHONDRIAL F1 COMPLEX, EPSILON SUBUNIT;ATP5E	0.129983	6.38648	2.91729	0.0902719
ENSG00000116459	ATP5F1	protein_coding	ATPase, F0 complex, B chain/subunit B/MI25	ATP synthase, H+ transporting, mitochondrial Fo complex subunit B1	ATP SYNTHASE, H+ TRANSPORTING, MITOCHONDRIAL FO COMPLEX, SUBUNIT B,ISOFORM 1; ATP5F1	-0.790209	7.60765	348.561	5.62352e-37
ENSG00000159199	ATP5G1	protein_coding	ATPase, F0 complex, subunit C	ATP synthase, H+ transporting, mitochondrial Fo complex subunit C1 (subunit 9)	ATP SYNTHASE, H+ TRANSPORTING, MITOCHONDRIAL FO COMPLEX, SUBUNIT C,ISOFORM 1; ATP5G1;;MITOCHONDRIAL ATP SYNTHASE, SUBUNIT C, ISOFORM 1;;MITOCHONDRIAL ATP SYNTHASE, SUBUNIT 9, ISOFORM 1	-1.45585	5.79024	257.491	2.09277e-31
ENSG00000135390	ATP5G2	protein_coding	ATPase, F0 complex, subunit C	ATP synthase, H+ transporting, mitochondrial Fo complex subunit C2 (subunit 9)	ATP SYNTHASE, H+ TRANSPORTING, MITOCHONDRIAL FO COMPLEX, SUBUNIT C,ISOFORM 2; ATP5G2;;MITOCHONDRIAL ATP SYNTHASE, SUBUNIT C, ISOFORM 2;;MITOCHONDRIAL ATP SYNTHASE, SUBUNIT 9, ISOFORM 2	-0.465592	8.19856	59.636	4.16493e-12
ENSG00000154518	ATP5G3	protein_coding	ATPase, F0 complex, subunit C	ATP synthase, H+ transporting, mitochondrial Fo complex subunit C3 (subunit 9)	ATP SYNTHASE, H+ TRANSPORTING, MITOCHONDRIAL FO COMPLEX, SUBUNIT C,ISOFORM 3; ATP5G3;;MITOCHONDRIAL ATP SYNTHASE, SUBUNIT C, ISOFORM 3;;MITOCHONDRIAL ATP SYNTHASE, SUBUNIT 9, ISOFORM 3	-0.814633	7.90631	187.071	4.52852e-26
ENSG00000167863	ATP5H	protein_coding	ATPase, F0 complex, subunit D, mitochondrial	ATP synthase, H+ transporting, mitochondrial Fo complex subunit D		-0.200853	5.82684	9.0427	0.00322547
ENSG00000261679	ATP5HP1	processed_pseudogene				-0.400057	3.83792	31.8304	1.17944e-07
ENSG00000229184	ATP5HP2	processed_pseudogene				-0.474812	1.90167	12.0971	0.000708677
ENSG00000213954	ATP5HP3	processed_pseudogene				-0.447751	2.80393	30.2012	2.29114e-07
ENSG00000234925	ATP5HP4	processed_pseudogene				-0.306099	2.4376	9.58951	0.00244688
ENSG00000169020	ATP5I	protein_coding	ATPase, F0 complex, subunit E, mitochondrial	ATP synthase, H+ transporting, mitochondrial Fo complex subunit E	ATP SYNTHASE, H+ TRANSPORTING, MITOCHONDRIAL FO COMPLEX, SUBUNIT E;ATP5I;;F1FO-ATP SYNTHASE, MURINE e SUBUNIT GENE; ATP5K	-0.310873	4.86214	7.81153	0.00606389
ENSG00000154723	ATP5J	protein_coding	ATPase, F0 complex, subunit F6, mitochondrial	ATP synthase, H+ transporting, mitochondrial Fo complex subunit F6	ATP SYNTHASE, H+ TRANSPORTING, MITOCHONDRIAL FO COMPLEX, SUBUNIT F6;ATP5J;;MITOCHONDRIAL ATP SYNTHASE, SUBUNIT F6;;MITOCHONDRIAL ATP SYNTHASE, COUPLING FACTOR 6;;ATP5	-0.702521	6.04073	95.9583	6.2766e-17
ENSG00000241468	ATP5J2	protein_coding	Mitochondrial F1-F0 ATP synthase subunit F, predicted	ATP synthase, H+ transporting, mitochondrial Fo complex subunit F2		-0.691678	5.91527	132.871	4.90323e-21
ENSG00000167283	ATP5L	protein_coding	ATPase, F0 complex, subunit G, mitochondrial	ATP synthase, H+ transporting, mitochondrial Fo complex subunit G		0.0373301	7.53871	0.551205	0.459306
ENSG00000241837	ATP5O	protein_coding	ATPase, OSCP/delta subunit	ATP synthase, H+ transporting, mitochondrial F1 complex, O subunit	ATP SYNTHASE, H+ TRANSPORTING, MITOCHONDRIAL F1 COMPLEX, O SUBUNIT;ATP5O;;MITOCHONDRIAL ATP SYNTHASE, O SUBUNIT;;OLIGOMYCIN SENSITIVITY-CONFERRING PROTEIN; OSCP	-0.70721	4.98735	112.507	7.47599e-19
ENSG00000125375	ATP5S	protein_coding	ATP synthase subunit s, mitochondrial	ATP synthase, H+ transporting, mitochondrial Fo complex subunit s (factor B)		0.246511	3.98492	9.28929	0.00284682
ENSG00000105341	ATP5SL	protein_coding	ATP synthase subunit s-like protein	ATP5S like		-0.198752	5.36281	11.5627	0.000919623
ENSG00000071553	ATP6AP1	protein_coding	ATPase, V1 complex, subunit S1	ATPase H+ transporting accessory protein 1	ATPase, H+ TRANSPORTING, LYSOSOMAL, ACCESSORY PROTEIN 1; ATP6AP1;;ATP6IP1;;ATP6S1;;VACUOLAR ATPase SUBUNIT 1; VATPS1;;Ac45	0.679116	7.52608	147.565	1.67596e-22
ENSG00000205464	ATP6AP1L	protein_coding	ATPase, V1 complex, subunit S1	ATPase H+ transporting accessory protein 1 like		1.46134	-0.748156	20.9942	1.15453e-05
ENSG00000182220	ATP6AP2	protein_coding	Renin receptor-like	ATPase H+ transporting accessory protein 2	ATPase, H+ TRANSPORTING, LYSOSOMAL, ACCESSORY PROTEIN 2; ATP6AP2;;M8-9, BOVINE, HOMOLOG OF;;ATP6M8-9;;RENIN RECEPTOR	0.324572	7.45279	37.4294	1.27884e-08
ENSG00000033627	ATP6V0A1	protein_coding	V-type ATPase, V0 complex, 116kDa subunit family	microRNA 5010		1.02941	6.68767	311.52	7.43544e-35
ENSG00000185344	ATP6V0A2	protein_coding	V-type ATPase, V0 complex, 116kDa subunit family	ATPase H+ transporting V0 subunit a2	ATPase, H+ TRANSPORTING, LYSOSOMAL, V0 SUBUNIT A2; ATP6V0A2;;A2V-ATPase	-0.554671	6.11881	168.555	1.84623e-24
ENSG00000117410	ATP6V0B	protein_coding	V-ATPase proteolipid subunit	ATPase H+ transporting V0 subunit b	ATPase, H+ TRANSPORTING, LYSOSOMAL, 21-KD, V0 SUBUNIT C-PRIME, PRIME;ATP6V0B;;ATPase, H+ TRANSPORTING, LYSOSOMAL, SUBUNIT F; ATP6F;;VACUOLAR PROTON PUMP, 21-KD SUBUNIT;;VMA16, S. CEREVISIAE, HOMOLOG OF; VMA16	-0.365781	7.71816	41.8042	2.39442e-09
ENSG00000185883	ATP6V0C	protein_coding	V-ATPase proteolipid subunit	ATPase H+ transporting V0 subunit c	ATPase, H+ TRANSPORTING, LYSOSOMAL, 16-KD, V0 SUBUNIT C; ATP6V0C;;ATPase, H+ TRANSPORTING, LYSOSOMAL; ATP6L;;VACUOLAR PROTON PUMP, SUBUNIT C; VPPC	0.537059	-1.1455	1.62265	0.205233
ENSG00000213435	ATP6V0CP3	processed_pseudogene				0.0477179	4.43008	0.306599	0.580826
ENSG00000159720	ATP6V0D1	protein_coding	ATPase, V0 complex, c/d subunit	ATPase H+ transporting V0 subunit d1	ATPase, H+ TRANSPORTING, LYSOSOMAL, 38-KD, V0 SUBUNIT D, ISOFORM 1;ATP6V0D1;;VACUOLAR PROTON PUMP, V0 SUBUNIT D, ISOFORM 1;;V-ATPase, SUBUNIT D	0.773504	7.12502	156.449	2.38266e-23
ENSG00000113732	ATP6V0E1	protein_coding	ATPase, V0 complex, subunit e1/e2	ATPase H+ transporting V0 subunit e1	ATPase, H+ TRANSPORTING, LYSOSOMAL, 9-KD, V0 SUBUNIT E1; ATP6V0E1;;ATP6V0E;;ATPase, H+ TRANSPORTING, LYSOSOMAL, SUBUNIT H; ATP6H	0.209537	6.5159	20.7157	1.30619e-05
ENSG00000114573	ATP6V1A	protein_coding	ATPase, F1/V1/A1 complex, alpha/beta subunit, nucleotide-binding domain	ATPase H+ transporting V1 subunit A	ATPase, H+ TRANSPORTING, LYSOSOMAL ALPHA POLYPEPTIDE, 70-KD, ISOFORM1; ATP6V1A1;;V-ATPase A SUBUNIT 1;;VACUOLAR PROTON PUMP, ALPHA SUBUNIT 1;;VA68HO68, INCLUDED	0.215733	6.63736	12.6853	0.000533066
ENSG00000147416	ATP6V1B2	protein_coding	ATPase, F1/V1/A1 complex, alpha/beta subunit, nucleotide-binding domain	ATPase H+ transporting V1 subunit B2	ATPase, H+ TRANSPORTING, LYSOSOMAL, 56/58-KD, V1 SUBUNIT B, ISOFORM2; ATP6V1B2;;ATP6B2;;VACUOLAR PROTON PUMP B ISOFORM 2	0.725343	8.49	137.203	1.77576e-21
ENSG00000155097	ATP6V1C1	protein_coding	ATPase, V1 complex, subunit C	ATPase H+ transporting V1 subunit C1	ATPase, H+ TRANSPORTING, LYSOSOMAL, 42-KD, V1 SUBUNIT C, ISOFORM 1;ATP6V1C1;;ATPase, H+ TRANSPORTING, LYSOSOMAL, SUBUNIT C; ATP6C;;VACUOLAR PROTON PUMP, 42-KD SUBUNIT;;V-ATPase, SUBUNIT C;;ATPase, H+ TRANSPORTING, LYSOSOMAL, SUBUNIT D, FORMERLY; ATP /.../MERLY	-0.172303	6.33443	5.91202	0.0165458
ENSG00000100554	ATP6V1D	protein_coding	ATPase, V1 complex, subunit D	ATPase H+ transporting V1 subunit D	ATPase, H+ TRANSPORTING, LYSOSOMAL, 34-KD, V1 SUBUNIT D; ATP6V1D;;ATP6M	0.14499	3.7764	3.14298	0.078842
ENSG00000131100	ATP6V1E1	protein_coding	ATPase, V1/A1 complex, subunit E	ATPase H+ transporting V1 subunit E1	ATPase, H+ TRANSPORTING, LYSOSOMAL, 31-KD, V1 SUBUNIT E; ATP6V1E;;ATPase, H+ TRANSPORTING, LYSOSOMAL, SUBUNIT E; ATP6E;;VACUOLAR PROTON PUMP, 31-KD SUBUNIT	0.144974	6.58593	15.3228	0.000152301
ENSG00000250565	ATP6V1E2	protein_coding	ATPase, V1/A1 complex, subunit E	ATPase H+ transporting V1 subunit E2		0.234254	2.73766	8.08513	0.00526391
ENSG00000128524	ATP6V1F	protein_coding	ATPase, V1 complex, subunit F, eukaryotic	ATPase H+ transporting V1 subunit F	ATPase, H+ TRANSPORTING, LYSOSOMAL, 14-KD, V1 SUBUNIT F; ATP6V1F;;VACUOLAR ATPase, 14-KD SUBUNIT	-0.104708	5.9913	2.6457	0.106506
ENSG00000136888	ATP6V1G1	protein_coding	Vacuolar (H+)-ATPase G subunit	ATPase H+ transporting V1 subunit G1	ATPase, H+ TRANSPORTING, LYSOSOMAL, 13-KD, V1 SUBUNIT G, ISOFORM 1;ATP6V1G1;;ATP6G1	-0.00289474	6.5174	0.00416434	0.948656
ENSG00000047249	ATP6V1H	protein_coding	ATPase, V1 complex, subunit H	ATPase H+ transporting V1 subunit H	ATPase, H+ TRANSPORTING, LYSOSOMAL, 50/57-KD, V1 SUBUNIT H; ATP6V1H;;NEF-BINDING PROTEIN 1; NBP1;;VMA13, S. CEREVISIAE, HOMOLOG OF; VMA13	0.125499	5.56457	7.52769	0.00702762
ENSG00000165240	ATP7A	protein_coding	P-type ATPase	ATPase copper transporting alpha	ATPase, Cu(2+)-TRANSPORTING, ALPHA POLYPEPTIDE; ATP7A	0.385649	3.95421	18.6152	3.34813e-05
ENSG00000123191	ATP7B	protein_coding	P-type ATPase	ATPase copper transporting beta	ATPase, Cu(2+)-TRANSPORTING, BETA POLYPEPTIDE; ATP7B	-0.0640471	3.21817	0.528846	0.468537
ENSG00000124406	ATP8A1	protein_coding	P-type ATPase	ATPase phospholipid transporting 8A1		-0.131621	1.66572	0.371424	0.543404
ENSG00000143515	ATP8B2	protein_coding	P-type ATPase, subfamily IV	ATPase phospholipid transporting 8B2	ATPase, CLASS I, TYPE 8B, MEMBER 2; ATP8B2;;ATPID	-0.034751	3.58961	0.105165	0.746293
ENSG00000130270	ATP8B3	protein_coding	P-type ATPase	ATPase phospholipid transporting 8B3	ATPase, CLASS I, TYPE 8B, MEMBER 3; ATP8B3;;ATPIK	0.812521	3.42859	49.1678	1.59145e-10
ENSG00000104043	ATP8B4	protein_coding	P-type ATPase, subfamily IV	ATPase phospholipid transporting 8B4 (putative)	ATPase, CLASS I, TYPE 8B, MEMBER 4; ATP8B4;;KIAA1939	0.563972	6.35398	79.1236	8.28175e-15
ENSG00000179766	ATP8B5P	transcribed_unprocessed_pseudogene				0.353275	2.64634	6.85884	0.00998132
ENSG00000166377	ATP9B	protein_coding		ATPase phospholipid transporting 9B (putative)	ATPase, CLASS II, TYPE 9B; ATP9B	0.221465	5.17135	18.0572	4.313e-05
ENSG00000123472	ATPAF1	protein_coding	ATP11	ATP synthase mitochondrial F1 complex assembly factor 1	ATP SYNTHASE, MITOCHONDRIAL F1 COMPLEX, ASSEMBLY FACTOR 1; ATPAF1;;ATP11, S. CEREVISIAE, HOMOLOG OF; ATP11	-0.541522	5.5879	147.373	1.7493e-22
ENSG00000171953	ATPAF2	protein_coding		ATP synthase mitochondrial F1 complex assembly factor 2	ATP SYNTHASE, MITOCHONDRIAL F1 COMPLEX, ASSEMBLY FACTOR 2; ATPAF2;;ATP12, S. CEREVISIAE, HOMOLOG OF; ATP12	0.0270125	4.20762	0.129696	0.719393
ENSG00000130770	ATPIF1	protein_coding	Mitochondrial ATPase inhibitor	ATPase inhibitory factor 1	ATPase INHIBITORY FACTOR 1; ATPIF1;;IF1	-0.369133	5.0531	60.6849	2.92756e-12
ENSG00000175054	ATR	protein_coding	Phosphatidylinositol 3-/4-kinase, catalytic domain	ATR serine/threonine kinase	ATR GENE; ATR;;ATAXIA-TELANGIECTASIA AND RAD3-RELATED;;FRAP-RELATED PROTEIN 1; FRP1	-0.708223	5.68168	96.5713	5.29392e-17
ENSG00000138085	ATRAID	protein_coding	EGF-like domain	all-trans retinoic acid induced differentiation factor		-0.068072	6.05857	2.42951	0.121756
ENSG00000088812	ATRN	protein_coding	EGF-like domain	attractin		0.133004	7.07258	18.0424	4.34226e-05
ENSG00000085224	ATRX	protein_coding	SNF2-related, N-terminal domain	ATRX, chromatin remodeler	ATR-X GENE; ATRX;;HELICASE 2, X-LINKED; XH2;;X-LINKED NUCLEAR PROTEIN GENE; XNP	0.407896	7.0469	31.7264	1.23024e-07
ENSG00000124788	ATXN1	protein_coding	Ataxin, AXH domain	ataxin 1	ATAXIN 1; ATXN1ATXN1, ALTERNATIVE READING FRAME, INCLUDED;;ALT-ATXN1, INCLUDED	1.56632	5.90628	407.383	5.08586e-40
ENSG00000130638	ATXN10	protein_coding	Armadillo-like helical	ataxin 10	ATAXIN 10; ATXN10;;E46-LIKE; E46L	-0.589734	7.21611	155.893	2.68688e-23
ENSG00000224470	ATXN1L	protein_coding	Ataxin, AXH domain	ataxin 1 like	ATAXIN 1-LIKE; ATXN1L;;BROTHER OF ATAXIN 1; BOAT; BOAT1;;BROTHER OF ATXN1	0.573513	6.68906	259.851	1.44506e-31
ENSG00000204842	ATXN2	protein_coding	Ataxin-2, C-terminal	ataxin 2	ATAXIN 2; ATXN2	-0.121836	5.83488	8.33703	0.00462394
ENSG00000168488	ATXN2L	protein_coding	LsmAD domain	ataxin 2 like	ATAXIN 2-LIKE; ATXN2L	-0.181212	8.46227	6.20947	0.0140998
ENSG00000066427	ATXN3	protein_coding	Ubiquitin interacting motif	ataxin 3	ATAXIN 3; ATXN3;;AT3;;MJD GENE; MJD1;;SCA3 GENE	0.183439	5.07326	5.23176	0.0239652
ENSG00000163635	ATXN7	protein_coding		ataxin 7	ATAXIN 7; ATXN7	0.519055	5.8012	119.199	1.36563e-19
ENSG00000146776	ATXN7L1	protein_coding	SCA7 domain	ataxin 7 like 1		-0.257091	3.75987	12.2131	0.000669855
ENSG00000162650	ATXN7L2	protein_coding		ataxin 7 like 2		-0.779731	3.13892	49.7868	1.27453e-10
ENSG00000087152	ATXN7L3	protein_coding	SCA7 domain	ataxin 7 like 3		-0.117074	7.20513	7.91007	0.0057621
ENSG00000253719	ATXN7L3B	protein_coding		ataxin 7 like 3B	ATAXIN 7-LIKE 3B; ATXN7L3B	0.173776	7.16616	30.331	2.17247e-07
ENSG00000148090	AUH	protein_coding	Crotonase superfamily	AU RNA binding methylglutaconyl-CoA hydratase	AU-SPECIFIC RNA-BINDING PROTEIN; AUH;;3-@METHYLGLUTACONYL-CoA HYDRATASE	-0.501942	3.19721	37.5136	1.23767e-08
ENSG00000127423	AUNIP	protein_coding	Aurora kinase A and ninein interacting protein	aurora kinase A and ninein interacting protein		-0.33294	3.86884	19.1779	2.59723e-05
ENSG00000115307	AUP1	protein_coding	Ubiquitin system component Cue	ancient ubiquitous protein 1	ANCIENT UBIQUITOUS PROTEIN 1; AUP1	-0.550097	7.24119	100.366	1.86551e-17
ENSG00000087586	AURKA	protein_coding	Protein kinase domain	aurora kinase A		-0.231262	6.4809	12.9043	0.000479683
ENSG00000175756	AURKAIP1	protein_coding	Domain of unknown function DUF1713	aurora kinase A interacting protein 1	AURORA KINASE A-INTERACTING PROTEIN;;AURKA-INTERACTING PROTEIN; AIP	-0.678524	5.87892	64.2408	9.00311e-13
ENSG00000178999	AURKB	protein_coding	Protein kinase domain	aurora kinase B	AURORA KINASE B; AURKB;;SERINE/THREONINE PROTEIN KINASE 12; STK12;;AURORA-RELATED KINASE 2; ARK2;;AURORA/IPL1-LIKE KINASE 2; AIK2;;AIM1, RAT, HOMOLOG OF; AIM1	-0.144859	4.92466	2.93359	0.0893883
ENSG00000169857	AVEN	protein_coding	Cell death regulator Aven	apoptosis and caspase activation inhibitor	APOPTOSIS AND CASPASE ACTIVATION INHIBITOR; AVEN;;CELL DEATH REGULATOR AVEN	-0.784939	3.74493	103.677	7.62141e-18
ENSG00000105778	AVL9	protein_coding	AVL9/DENND6 domain	AVL9 cell migration associated	AVL9, S. CEREVISIAE, HOMOLOG OF; AVL9;;KIAA0241	0.12529	6.63972	8.46433	0.0043317
ENSG00000119986	AVPI1	protein_coding	Arginine vasopressin-induced protein 1/C8orf4	arginine vasopressin induced 1		-0.87395	1.30828	31.8361	1.17675e-07
ENSG00000103126	AXIN1	protein_coding	DIX domain	axin 1	AXIS INHIBITOR 1; AXIN1;;AXIN;;FUSED, MOUSE, HOMOLOG OF	0.113631	5.49185	1.8184	0.180094
ENSG00000168646	AXIN2	protein_coding	DIX domain	axin 2	AXIS INHIBITOR 2; AXIN2;;CONDUCTIN, MOUSE, HOMOLOG OF	-0.615041	-1.01051	2.1073	0.149259
ENSG00000163512	AZI2	protein_coding	Tbk1/Ikki binding domain	5-azacytidine induced 2	5-@AZACYTIDINE-INDUCED GENE 2, MOUSE, HOMOLOG OF; AZI2;;AZI2, MOUSE, HOMOLOG OF; AZ2;;NAK-ASSOCIATED PROTEIN 1; NAP1;;TILP	-0.112196	6.04387	3.70488	0.0566677
ENSG00000155096	AZIN1	protein_coding	Ornithine/DAP/Arg decarboxylase	antizyme inhibitor 1		0.349953	8.53841	37.1969	1.39991e-08
ENSG00000172232	AZU1	protein_coding	Serine proteases, trypsin domain	azurocidin 1	NEUTROPHIL AZUROCIDIN; NAZC;;AZUROCIDIN; AZU1;;CATIONIC ANTIMICROBIAL PROTEIN-37; CAP37	0.334996	5.54221	4.47883	0.0365379
ENSG00000166710	B2M	protein_coding	Immunoglobulin/major histocompatibility complex, conserved site	beta-2-microglobulin	BETA-2-MICROGLOBULIN; B2M	0.865803	11.784	276.988	1.05077e-32
ENSG00000162885	B3GALNT2	protein_coding	Glycosyl transferase, family 31	beta-1,3-N-acetylgalactosaminyltransferase 2	BETA-1,3-N-ACETYLGALACTOSAMINYLTRANSFERASE 2; B3GALNT2;;UDP-GalNAc:BETA-GLcNAc-BETA-1,3-GALACTOSAMINYLTRANSFERASE, POLYPEPTIDE2;;B3GalNAc-T2;;MGC39558	-0.967096	5.03494	459.002	2.01875e-42
ENSG00000235863	B3GALT4	protein_coding	Glycosyl transferase, family 31	beta-1,3-galactosyltransferase 4	UDP-GAL:BETA-GlcNAc BETA-1,3-GALACTOSYLTRANSFERASE, POLYPEPTIDE 4;B3GALT4;;BETA-3-GALACTOSYLTRANSFERASE 4;;BETA-3-GALT4	2.4339	2.32413	147.891	1.55818e-22
ENSG00000176022	B3GALT6	protein_coding	Glycosyl transferase, family 31	beta-1,3-galactosyltransferase 6	UDP-GAL:BETA-GAL BETA-1,3-GALACTOSYLTRANSFERASE POLYPEPTIDE 6;B3GALT6;;GALACTOSYLTRANSFERASE II; GALTII;;BETA-1,3-GALACTOSYLTRANSFERASE 6;;BETA-3-GALT6	-0.930649	5.39949	86.5931	9.02049e-16
ENSG00000112309	B3GAT2	protein_coding	Glycosyl transferase, family 43	beta-1,3-glucuronyltransferase 2	BETA-1,3-GLUCURONYLTRANSFERASE 2; B3GAT2;;UDP-GLUCURONYLTRANSFERASE S;;GLUCURONOSYLTRANSFERASE S; GLCATS;;KIAA1963	-1.55667	-1.03766	19.1791	2.59575e-05
ENSG00000149541	B3GAT3	protein_coding	Glycosyl transferase, family 43	beta-1,3-glucuronyltransferase 3	BETA-1,3-GLUCURONYLTRANSFERASE 3; B3GAT3;;GLUCURONOSYLTRANSFERASE I; GLCATI	-0.12861	5.3224	2.38884	0.12489
ENSG00000187676	B3GLCT	protein_coding	Fringe-like	beta 3-glucosyltransferase	BETA-3-GLUCOSYLTRANSFERASE; B3GLCT;;UDP-GAL:BETA-GlcNAc BETA-1,3-GALACTOSYLTRANSFERASE-LIKE; B3GALTL;;BETA-3-GLYCOSYLTRANSFERASE-LIKE; B3GTL;;BETA-1,3-GLUCOSYLTRANSFERASE	0.678427	3.31277	75.8228	2.26819e-14
ENSG00000170340	B3GNT2	protein_coding	Glycosyl transferase, family 31	UDP-GlcNAc:betaGal beta-1,3-N-acetylglucosaminyltransferase 2	BETA-1,3-N-ACETYLGLUCOSYAMINYLTRANSFERASE 2; B3GNT2;;BETA-1,3-N-ACETYLGLUCOSAMINYLTRANSFERASE 1, FORMERLY; B3GNT1, FORMERLY;;B3GNT	0.594787	5.8327	92.3867	1.7097e-16
ENSG00000176597	B3GNT5	protein_coding	Glycosyl transferase, family 31	UDP-GlcNAc:betaGal beta-1,3-N-acetylglucosaminyltransferase 5	BETA-1,3-N-ACETYLGLUCOSAMINYLTRANSFERASE 5; B3GNT5;;LACTOTRIAOSYLCERAMIDE SYNTHASE;;LC3 SYNTHASE	0.693953	6.25204	84.7046	1.56751e-15
ENSG00000177191	B3GNT8	protein_coding	Glycosyl transferase, family 31	UDP-GlcNAc:betaGal beta-1,3-N-acetylglucosaminyltransferase 8	BETA-1,3-GALACTOSYLTRANSFERASE 8; B3GNT8;;BGALT15;;BETA-1,3-GALACTOSYLTRANSFERASE 7, FORMERLY; B3GALT7, FORMERLY	0.771102	4.12643	38.18	9.55876e-09
ENSG00000237172	B3GNT9	protein_coding	Glycosyl transferase, family 31	UDP-GlcNAc:betaGal beta-1,3-N-acetylglucosaminyltransferase 9		0.838824	2.16437	26.706	9.79882e-07
ENSG00000175711	B3GNTL1	protein_coding	Nucleotide-diphospho-sugar transferases	UDP-GlcNAc:betaGal beta-1,3-N-acetylglucosaminyltransferase-like 1	BETA-1,3-N-ACETYLGLUCOSAMINYLTRANSFERASE-LIKE 1; B3GNTL1	-0.327053	4.8799	14.5708	0.000216855
ENSG00000135454	B4GALNT1	protein_coding	Glycosyltransferase 2-like	beta-1,4-N-acetyl-galactosaminyltransferase 1	BETA-1,4-N-ACETYLGALACTOSAMINYLTRANSFERASE 1; B4GALNT1;;BETA-1,4-N-ACETYLGALACTOSAMINYLTRANSFERASE; GALGT;;GalNAcT;;GM2/GD2 SYNTHASE	-0.617433	2.34823	29.3687	3.227e-07
ENSG00000139044	B4GALNT3	protein_coding	Chondroitin N-acetylgalactosaminyltransferase	beta-1,4-N-acetyl-galactosaminyltransferase 3	BETA-1,4-N-ACETYLGALACTOSAMINYLTRANSFERASE 3; B4GALNT3;;B4GalNAcT3	1.20495	-1.075	11.3068	0.00104248
ENSG00000086062	B4GALT1	protein_coding	Beta-1,4-galactosyltransferase	beta-1,4-galactosyltransferase 1	UDP-GAL:BETA-GlcNAc BETA-1,4-GALACTOSYLTRANSFERASE, POLYPEPTIDE 1;B4GALT1;;BETA-1,4-GALACTOSYLTRANSFERASE 1;;GTB;;GALACTOSYLTRANSFERASE 1; GT1;;GLYCOPROTEIN 4-BETA-GALACTOSYLTRANSFERASE 2; GGTB2LACTOSE SYNTHETASE, INCLUDED	-0.0243686	6.97218	0.358727	0.550366
ENSG00000117411	B4GALT2	protein_coding	Beta-1,4-galactosyltransferase	beta-1,4-galactosyltransferase 2	UDP-GAL:BETA-GlcNAc BETA-1,4-GALACTOSYLTRANSFERASE, POLYPEPTIDE 2;B4GALT2;;BETA-1,4-GALACTOSYLTRANSFERASE 2;;BETA-4-GALT2	-1.5862	5.26935	225.551	4.01225e-29
ENSG00000158850	B4GALT3	protein_coding	Beta-1,4-galactosyltransferase	beta-1,4-galactosyltransferase 3	UDP-GAL:BETA-GlcNAc BETA-1,4-GALACTOSYLTRANSFERASE, POLYPEPTIDE 3;B4GALT3;;BETA-1,4-GALACTOSYLTRANSFERASE 3;;BETA-4-GALT3	-0.701467	5.72539	199.434	4.31273e-27
ENSG00000121578	B4GALT4	protein_coding	Beta-1,4-galactosyltransferase	beta-1,4-galactosyltransferase 4	UDP-GAL:BETA-GlcNAc BETA-1,4-GALACTOSYLTRANSFERASE, POLYPEPTIDE 4;B4GALT4;;BETA-1,4-GALACTOSYLTRANSFERASE 4	0.419561	2.92986	31.1509	1.55423e-07
ENSG00000158470	B4GALT5	protein_coding	Beta-1,4-galactosyltransferase	beta-1,4-galactosyltransferase 5	UDP-GAL:BETA-GlcNAc BETA-1,4-GALACTOSYLTRANSFERASE, POLYPEPTIDE 5;B4GALT5;;BETA-1,4-GALACTOSYLTRANSFERASE 5	-0.0819914	7.09872	2.40238	0.123836
ENSG00000118276	B4GALT6	protein_coding	Beta-1,4-galactosyltransferase	beta-1,4-galactosyltransferase 6	UDP-GAL:BETA-GlcNAc BETA-1,4-GALACTOSYLTRANSFERASE, POLYPEPTIDE 6;B4GALT6;;BETA-1,4-GALACTOSYLTRANSFERASE 6	0.0616769	4.39712	0.445072	0.505991
ENSG00000027847	B4GALT7	protein_coding	Beta-1,4-galactosyltransferase	beta-1,4-galactosyltransferase 7	XYLOSYLPROTEIN 4-BETA-GALACTOSYLTRANSFERASE, POLYPEPTIDE 7; B4GALT7;;XGPT1; XGALT1;;GALACTOSYLTRANSFERASE I	-0.0943242	4.22613	1.24018	0.267707
ENSG00000174684	B4GAT1	protein_coding		beta-1,4-glucuronyltransferase 1	BETA-1,3-N-ACETYLGLUCOSAMINYLTRANSFERASE 1; B3GNT1;;i-BETA-1,3-N-ACETYLGLUCOSAMINYLTRANSFERASE; iGNT	-0.732766	2.68872	45.9961	5.03462e-10
ENSG00000108641	B9D1	protein_coding		B9 domain containing 1	B9 DOMAIN-CONTAINING PROTEIN 1; B9D1;;MKS1-RELATED PROTEIN 1; MKSR1	-1.02174	0.299444	31.6596	1.26397e-07
ENSG00000123810	B9D2	protein_coding	B9 domain	B9 protein domain 2	B9 DOMAIN-CONTAINING PROTEIN 2; B9D2;;STUMPY, MOUSE, HOMOLOG OF;;MKS1-RELATED PROTEIN 2; MKSR2	0.193546	1.80402	2.09681	0.150266
ENSG00000105393	BABAM1	protein_coding	von Willebrand factor, type A	BRISC and BRCA1 A complex member 1	CHROMOSOME 19 OPEN READING FRAME 62; C19ORF62;;MEDIATOR OF RAP80 INTERACTIONS AND TARGETING, 40-KD; MERIT40;;NEW COMPONENT OF BRCA1 A COMPLEX 1; NBA1	-0.458645	4.50732	45.5905	5.84366e-10
ENSG00000186318	BACE1	protein_coding	Aspartic peptidase A1 family	beta-secretase 1	BETA-SITE AMYLOID BETA A4 PRECURSOR PROTEIN-CLEAVING ENZYME 1; BACE1;;BETA-SITE APP-CLEAVING ENZYME; BACE;;SECRETASE, BETA;;MEMAPSIN 2	1.53395	3.22596	195.329	9.31795e-27
ENSG00000278768	BACE1-AS	antisense				0.328381	1.30653	6.95171	0.00950395
ENSG00000156273	BACH1	protein_coding		GRIK1 antisense RNA 2	BTB AND CNC HOMOLOGY 1; BACH1;;BASIC LEUCINE ZIPPER TRANSCRIPTION FACTOR 1	0.192885	6.97767	11.7069	0.00085701
ENSG00000112182	BACH2	protein_coding	BTB/POZ domain	BTB domain and CNC homolog 2	BTB AND CNC HOMOLOGY 2; BACH2;;BASIC LEUCINE ZIPPER TRANSCRIPTION FACTOR 2	1.3164	1.3476	78.2379	1.08339e-14
ENSG00000002330	BAD	protein_coding	Bcl2-associated agonist of cell death	BCL2 associated agonist of cell death	BCL2-ASSOCIATED AGONIST OF CELL DEATH; BAD;;BCL2 ANTAGONIST;;BCL2-BINDING PROTEIN; BCL2L8;;BCL2-BINDING COMPONENT 6	0.0562621	4.15935	0.545778	0.461519
ENSG00000107262	BAG1	protein_coding	Ubiquitin domain	BCL2 associated athanogene 1	BCL2-ASSOCIATED ATHANOGENE 1; BAG1;;RECEPTOR-ASSOCIATED PROTEIN, 46-KD; RAP46	-0.910603	6.51887	257.785	1.9982e-31
ENSG00000112208	BAG2	protein_coding	BAG domain	BCL2 associated athanogene 2	BCL2-ASSOCIATED ATHANOGENE 2; BAG2	-1.19242	5.14007	271.709	2.32726e-32
ENSG00000151929	BAG3	protein_coding	WW domain	BCL2 associated athanogene 3	BCL2-ASSOCIATED ATHANOGENE 3; BAG3	0.275399	0.5211	1.83123	0.178577
ENSG00000156735	BAG4	protein_coding	BAG domain	BCL2 associated athanogene 4	BCL2-ASSOCIATED ATHANOGENE 4; BAG4;;SILENCER OF DEATH DOMAINS; SODD	0.146785	5.49954	4.8704	0.0292621
ENSG00000166170	BAG5	protein_coding	BAG domain	BCL2 associated athanogene 5	BCL2-ASSOCIATED ATHANOGENE 5; BAG5	-0.120765	6.06856	6.1069	0.0148975
ENSG00000204463	BAG6	protein_coding		BCL2 associated athanogene 6		-0.185039	8.47672	10.1835	0.00181725
ENSG00000266074	BAHCC1	protein_coding	Bromo adjacent homology (BAH) domain	BAH domain and coiled-coil containing 1		-0.697803	7.68762	72.6781	6.02212e-14
ENSG00000140320	BAHD1	protein_coding	Bromo adjacent homology (BAH) domain	bromo adjacent homology domain containing 1	BROMO-ADJACENT HOMOLOGY DOMAIN-CONTAINING PROTEIN 1; BAHD1;;BAH DOMAIN-CONTAINING PROTEIN 1;;KIAA0945	-0.10784	6.04368	3.12544	0.0796714
ENSG00000175866	BAIAP2	protein_coding	SH3 domain	BAI1 associated protein 2		1.17871	2.69494	65.9405	5.16749e-13
ENSG00000226137	BAIAP2-AS1	lincRNA				1.15077	5.36785	187.571	4.11045e-26
ENSG00000030110	BAK1	protein_coding	Bcl2-like	BCL2 antagonist/killer 1	BCL2 ANTAGONIST KILLER 1; BAK1;;BAK;;BCL2L7BAK-LIKE, INCLUDED	-0.194677	5.81642	10.9025	0.00127206
ENSG00000095739	BAMBI	protein_coding	BMP and activin membrane-bound inhibitor	BMP and activin membrane bound inhibitor	BMP AND ACTIVIN MEMBRANE-BOUND INHIBITOR, XENOPUS, HOMOLOG OF; BAMBI;;NEUROMEDIN A; NMA	-0.950807	2.9308	130.788	8.04327e-21
ENSG00000175334	BANF1	protein_coding	Barrier- to-autointegration factor, BAF	barrier to autointegration factor 1	BARRIER-TO-AUTOINTEGRATION FACTOR 1; BANF1;;BARRIER-TO-AUTOINTEGRATION FACTOR; BAF	-0.610429	6.49996	111.014	1.10007e-18
ENSG00000230306	BANF1P2	processed_pseudogene				1.16193	-1.32465	4.08995	0.0454068
ENSG00000153064	BANK1	protein_coding	DBB domain	B-cell scaffold protein with ankyrin repeats 1	B-CELL SCAFFOLD PROTEIN WITH ANKYRIN REPEATS 1; BANK1;;FLJ20706;;BANK	-0.02661	1.00102	0.0214543	0.883799
ENSG00000172530	BANP	protein_coding		BTG3 associated nuclear protein	BTG3-ASSOCIATED NUCLEAR PROTEIN; BANP;;SCAFFOLD/MATRIX-ASSOCIATED REGION 1; SMAR1	-0.104746	3.42814	1.28794	0.258736
ENSG00000163930	BAP1	protein_coding	Peptidase C12, ubiquitin carboxyl-terminal hydrolase	BRCA1 associated protein 1	BRCA1-ASSOCIATED PROTEIN 1; BAP1	-0.171473	7.02017	9.64647	0.00237779
ENSG00000138376	BARD1	protein_coding	BRCT domain	BRCA1 associated RING domain 1	BRCA1-ASSOCIATED RING DOMAIN 1; BARD1	0.519634	5.42578	53.9193	2.95837e-11
ENSG00000131668	BARX1	protein_coding	Helix-turn-helix motif	BARX homeobox 1	BarH-LIKE HOMEOBOX GENE 1; BARX1	-0.198646	1.48317	1.41086	0.237305
ENSG00000176788	BASP1	protein_coding	Brain acid soluble protein 1	brain abundant membrane attached signal protein 1	BRAIN-ABUNDANT SIGNAL PROTEIN, MEMBRANE-ATTACHED, 1; BASP1;;BRAIN ACID-SOLUBLE PROTEIN 1;;NAP22, RAT, HOMOLOG OF; NAP22;;CAP23, CHICKEN, HOMOLOG OF; CAP23	0.741188	7.11724	53.095	4.10507e-11
ENSG00000156127	BATF	protein_coding	AP-1 transcription factor	basic leucine zipper ATF-like transcription factor	BASIC LEUCINE ZIPPER TRANSCRIPTION FACTOR, ATF-LIKE; BATF;;B-CELL ACTIVATING TRANSCRIPTION FACTOR;;BATF1;;SFA2	-0.134828	2.47022	1.32985	0.25117
ENSG00000123685	BATF3	protein_coding	AP-1 transcription factor	basic leucine zipper ATF-like transcription factor 3	BASIC LEUCINE ZIPPER TRANSCRIPTION FACTOR, ATF-LIKE 3; BATF3;;SMALL NUCLEAR FACTOR ISOLATED FROM T CELLS, 21-KD;;p21(SNFT)	-1.52558	3.03233	162.332	6.77954e-24
ENSG00000087088	BAX	protein_coding	Bcl2-like	BCL2 associated X, apoptosis regulator	BCL2-ASSOCIATED X PROTEIN; BAX	0.083008	5.74614	1.79474	0.182931
ENSG00000198604	BAZ1A	protein_coding	Bromodomain	bromodomain adjacent to zinc finger domain 1A	BROMODOMAIN ADJACENT TO ZINC FINGER DOMAIN, 1A; BAZ1A;;WCRF180;;ACF1, DROSOPHILA, HOMOLOG OF; ACF1	-0.118047	7.20002	5.14895	0.0250826
ENSG00000009954	BAZ1B	protein_coding	Bromodomain	bromodomain adjacent to zinc finger domain 1B	BROMODOMAIN ADJACENT TO ZINC FINGER DOMAIN, 1B; BAZ1B;;WILLIAMS SYNDROME TRANSCRIPTION FACTOR; WSTF;;WILLIAMS-BEUREN SYNDROME CHROMOSOME REGION 9; WBSCR9	-0.173523	8.06515	23.6128	3.67115e-06
ENSG00000076108	BAZ2A	protein_coding	Bromodomain	bromodomain adjacent to zinc finger domain 2A	BROMODOMAIN ADJACENT TO ZINC FINGER DOMAIN, 2A; BAZ2A	0.465352	7.9293	109.486	1.63753e-18
ENSG00000123636	BAZ2B	protein_coding	Bromodomain	bromodomain adjacent to zinc finger domain 2B	BROMODOMAIN ADJACENT TO ZINC FINGER DOMAIN, 2B; BAZ2B	1.23666	5.67158	295.971	6.56366e-34
ENSG00000105327	BBC3	protein_coding		microRNA 3191	BCL2-BINDING COMPONENT 3; BBC3;;p53-UPREGULATED MODULATOR OF APOPTOSIS; PUMA	0.424121	3.04493	6.21904	0.0140287
ENSG00000214413	BBIP1	protein_coding	Cilia BBSome complex subunit 10	BBSome interacting protein 1	BBS PROTEIN COMPLEX-INTERACTING PROTEIN 1; BBIP1;;BBSOME-INTERACTING PROTEIN 1;;BBS PROTEIN COMPLEX-INTERACTING PROTEIN, 10-KD; BBIP10;;BBS18 GENE;;NONCODING RNA 81, FORMERLY; NCRNA00081, FORMERLY	0.0727996	2.4068	0.410739	0.522841
ENSG00000119636	BBOF1	protein_coding	Basal body-orientation factor 1	basal body orientation factor 1		-1.04598	-0.722297	12.9014	0.000480366
ENSG00000129151	BBOX1	protein_coding	TauD/TfdA-like domain	gamma-butyrobetaine hydroxylase 1	BUTYROBETAINE-GAMMA,2-OXOGLUTARATE DIOXYGENASE 1; BBOX1;;GAMMA-BUTYROBETAINE HYDROXYLASE; GAMMA-BBH	4.68291	0.168113	24.4061	2.84629e-06
ENSG00000179941	BBS10	protein_coding	Chaperonin Cpn60/TCP-1 family	Bardet-Biedl syndrome 10	BBS10 GENE; BBS10;;CHROMOSOME 12 OPEN READING FRAME 58; C12ORF58;;FLJ23560	1.05813	4.00579	133.066	4.68232e-21
ENSG00000181004	BBS12	protein_coding	Chaperonin Cpn60/TCP-1 family	Bardet-Biedl syndrome 12	BBS12 GENE; BBS12;;FLJ35630;;C4ORF24	0.319665	1.54983	5.34428	0.0225301
ENSG00000125124	BBS2	protein_coding	Bardet-Biedl syndrome 2 protein	Bardet-Biedl syndrome 2	BBS2 GENE; BBS2	0.777864	5.36213	230.726	1.65723e-29
ENSG00000140463	BBS4	protein_coding		Bardet-Biedl syndrome 4	BBS4 GENE; BBS4	-0.324085	3.51782	26.7257	9.71759e-07
ENSG00000138686	BBS7	protein_coding	WD40/YVTN repeat-like-containing domain	Bardet-Biedl syndrome 7	BBS7 GENE; BBS7;;FLJ10715	0.180538	4.47603	6.73794	0.0106404
ENSG00000122507	BBS9	protein_coding	Parathyroid hormone-responsive B1	Bardet-Biedl syndrome 9	PARATHYROID HORMONE-RESPONSIVE B1 GENE;;PTH-RESPONSIVE B1 GENE; B1; PTHB1;;BBS9 GENE; BBS9	-0.318296	2.1474	9.51911	0.00253514
ENSG00000114439	BBX	protein_coding	High mobility group box domain	BBX, HMG-box containing		0.046378	6.69669	0.59092	0.443604
ENSG00000132692	BCAN	protein_coding	Immunoglobulin/major histocompatibility complex, conserved site	brevican		-1.28789	-0.564981	16.6897	8.07025e-05
ENSG00000075790	BCAP29	protein_coding	B-cell receptor-associated protein 29/31	B-cell receptor associated protein 29		0.400321	5.2934	26.5961	1.02635e-06
ENSG00000185825	BCAP31	protein_coding	B-cell receptor-associated protein 29/31	B-cell receptor-associated protein 31	B-CELL RECEPTOR-ASSOCIATED PROTEIN 31; BCAP31;;BAP31;;DXS1357E	-0.528993	7.4984	122.132	6.58206e-20
ENSG00000116752	BCAS2	protein_coding	Pre-mRNA-splicing factor SPF27	breast carcinoma amplified sequence 2	BREAST CARCINOMA AMPLIFIED SEQUENCE 2; BCAS2;;DAM1	-0.796553	4.96603	170	1.37063e-24
ENSG00000141376	BCAS3	protein_coding		BCAS3, microtubule associated cell migration factor	BREAST CARCINOMA AMPLIFIED SEQUENCE 3; BCAS3	0.829314	3.26071	88.5882	5.05989e-16
ENSG00000060982	BCAT1	protein_coding	Aminotransferase class IV	branched chain amino acid transaminase 1	BRANCHED-CHAIN AMINOTRANSFERASE 1; BCAT1;;BCT1;;PLACENTAL PROTEIN 18; PP18P3, INCLUDED	-1.87666	8.07862	371.293	3.75156e-38
ENSG00000105552	BCAT2	protein_coding	Aminotransferase class IV	branched chain amino acid transaminase 2	BRANCHED-CHAIN AMINOTRANSFERASE 2; BCAT2;;BCT2	-0.787729	5.52787	96.4629	5.45561e-17
ENSG00000107949	BCCIP	protein_coding	BCP1 family	BRCA2 and CDKN1A interacting protein	BRCA2- AND CDKN1A-INTERACTING PROTEIN; BCCIP;;p21- AND CDK-ASSOCIATED PROTEIN 1; TOK1	-1.18062	6.00262	242.846	2.19813e-30
ENSG00000186666	BCDIN3D	protein_coding	RNA methyltransferase bin3, C-terminal	BCDIN3 domain containing RNA methyltransferase		0.314261	3.11188	18.1042	4.22182e-05
ENSG00000083123	BCKDHB	protein_coding	Transketolase-like, pyrimidine-binding domain	branched chain keto acid dehydrogenase E1 subunit beta	BRANCHED-CHAIN KETO ACID DEHYDROGENASE E1, BETA POLYPEPTIDE; BCKDHB;;E1B	-0.235086	4.59029	12.8026	0.000503761
ENSG00000103507	BCKDK	protein_coding	Histidine kinase-like ATPase, C-terminal domain	branched chain ketoacid dehydrogenase kinase	BRANCHED-CHAIN ALPHA-KETO ACID DEHYDROGENASE KINASE; BCKDK;;BCKDH KINASE; BDK;;BCKD KINASE	-0.626385	5.7005	58.3328	6.47365e-12
ENSG00000142867	BCL10	protein_coding	CARD domain	B-cell CLL/lymphoma 10	B-CELL CLL/LYMPHOMA 10; BCL10;;B-CELL LEUKEMIA/LYMPHOMA 10	0.354994	4.64781	26.256	1.18497e-06
ENSG00000119866	BCL11A	protein_coding	Zinc finger, C2H2	B-cell CLL/lymphoma 11A		-1.35426	4.67589	351.753	3.76019e-37
ENSG00000127152	BCL11B	protein_coding	Zinc finger, C2H2	B-cell CLL/lymphoma 11B	B-CELL CLL/LYMPHOMA 11B; BCL11B;;CTIP2, MOUSE, HOMOLOG OF; CTIP2;;RADIATION-INDUCED TUMOR SUPPRESSOR GENE 1; RIT1	-0.561065	0.969899	8.41319	0.00448733
ENSG00000171791	BCL2	protein_coding	Bcl2-like	BCL2, apoptosis regulator	B-CELL CLL/LYMPHOMA 2; BCL2;;ONCOGENE B-CELL LEUKEMIA 2LEUKEMIA/LYMPHOMA, B-CELL, 2, INCLUDED	-1.13456	7.11482	270.529	2.78372e-32
ENSG00000140379	BCL2A1	protein_coding	Bcl2-like	BCL2 related protein A1	BCL2-RELATED PROTEIN A1; BCL2A1;;BCL2-RELATED GENE BFL1; BFL1	2.38163	3.24142	121.373	8.66279e-20
ENSG00000171552	BCL2L1	protein_coding	Bcl2-like	BCL2 like 1	BCL2-LIKE 1; BCL2L1;;BCL2-RELATED GENE; BCLXBCL2-RELATED PROTEIN, LONG ISOFORM, INCLUDED; BCLXL, INCLUDED;;BCL2-RELATED PROTEIN, SHORT ISOFORM, INCLUDED; BCLXS, INCLUDED	0.269279	5.12556	20.5666	1.39564e-05
ENSG00000153094	BCL2L11	protein_coding	Apoptosis, Bim N-terminal	BCL2 like 11		0.104342	6.19703	3.67808	0.057556
ENSG00000126453	BCL2L12	protein_coding		BCL2 like 12	BCL2-LIKE 12; BCL2L12	-0.655038	4.87673	71.07	9.98661e-14
ENSG00000099968	BCL2L13	protein_coding	Bcl2-like	BCL2 like 13		-0.387274	6.23349	75.5896	2.43709e-14
ENSG00000129473	BCL2L2	protein_coding	Apoptosis regulator, Bcl-2 protein, BH4	BCL2 like 2	BCL2-LIKE 2; BCL2L2;;BCLW	0.089524	4.22016	1.55813	0.214417
ENSG00000069399	BCL3	protein_coding	Ankyrin repeat	microRNA 8085	B-CELL LEUKEMIA/LYMPHOMA 3; BCL3;;BCL4, FORMERLY	2.75033	3.74066	268.04	4.06984e-32
ENSG00000113916	BCL6	protein_coding	BTB/POZ domain	B-cell CLL/lymphoma 6	B-CELL LYMPHOMA 6; BCL6;;ZINC FINGER PROTEIN 51; ZNF51;;LYMPHOMA-ASSOCIATED ZINC FINGER GENE ON CHROMOSOME 3; LAZ3BCL6/H4FM FUSION GENE, INCLUDED;;BCL6/IKAROS FUSION GENE, INCLUDED;;BCL6/LCP1 FUSION GENE, INCLUDED;;BLC6/IL21R FUSION GENE, INCLUDED	2.65893	3.57122	194.835	1.02303e-26
ENSG00000110987	BCL7A	protein_coding	BCL7	BCL tumor suppressor 7A	B-CELL CLL/LYMPHOMA 7A; BCL7A;;B-CELL CLL/LYMPHOMA 7; BCL7	-0.652959	5.43485	114.074	4.99903e-19
ENSG00000106635	BCL7B	protein_coding	BCL7	BCL tumor suppressor 7B	B-CELL CLL/LYMPHOMA 7B; BCL7B	-0.465312	5.75087	68.26	2.44315e-13
ENSG00000099385	BCL7C	protein_coding	BCL7	BCL tumor suppressor 7C	B-CELL CLL/LYMPHOMA 7C; BCL7C	-0.163052	4.5395	3.1665	0.0777454
ENSG00000116128	BCL9	protein_coding	B Cell Lymphoma 9	B-cell CLL/lymphoma 9	B-CELL CLL/LYMPHOMA 9; BCL9;;LEGLESS, DROSOPHILA, HOMOLOG OF; LGS	0.0906327	2.57579	0.429913	0.513312
ENSG00000186174	BCL9L	protein_coding	B Cell Lymphoma 9	B-cell CLL/lymphoma 9-like		0.793722	5.13844	74.1642	3.78832e-14
ENSG00000029363	BCLAF1	protein_coding	Bcl-2-associated transcription factor 1	BCL2 associated transcription factor 1	BCL2-ASSOCIATED TRANSCRIPTION FACTOR 1; BCLAF1;;BTF;;KIAA0164	-0.853666	7.65207	124.226	3.93111e-20
ENSG00000279800	BCLAF1P2	processed_pseudogene				-1.11286	0.664296	32.0785	1.0668e-07
ENSG00000197580	BCO2	protein_coding	Carotenoid oxygenase	beta-carotene oxygenase 2	BETA-CAROTENE DIOXYGENASE 2; BCDO2;;BETA-DIOX-II;;BETA-CAROTENE 9-PRIME,10-PRIME MONOOXYGENASE;;BETA-CAROTENE 9-PRIME,10-PRIME OXYGENASE; BCO2	2.14875	-0.811177	25.6249	1.59625e-06
ENSG00000183337	BCOR	protein_coding	Ankyrin repeat	BCL6 corepressor		0.256466	7.1042	25.8965	1.37998e-06
ENSG00000085185	BCORL1	protein_coding		BCL6 corepressor-like 1	BCL6 COREPRESSOR-LIKE 1; BCORL1	0.576284	5.51594	59.3305	4.61714e-12
ENSG00000186716	BCR	protein_coding	C2 domain	BCR, RhoGEF and GTPase activating protein	BREAKPOINT CLUSTER REGION; BCR;;BCR1BCR/ABL FUSION GENE, INCLUDED;;BCR/FGFR1 FUSION GENE, INCLUDED;;BCR/PDGFRA FUSION GENE, INCLUDED	-0.0415207	6.66285	0.471879	0.493476
ENSG00000215481	BCRP3	transcribed_unprocessed_pseudogene				0.0367766	2.24135	0.143106	0.705895
ENSG00000074582	BCS1L	protein_coding	BCS1, N-terminal	BCS1 homolog, ubiquinol-cytochrome c reductase complex chaperone	BCS1, S. CEREVISIAE, HOMOLOG-LIKE; BCS1L	-0.905018	4.30318	172.644	7.97736e-25
ENSG00000161267	BDH1	protein_coding	Short-chain dehydrogenase/reductase SDR	3-hydroxybutyrate dehydrogenase, type 1		-0.638597	5.3871	68.8807	2.00266e-13
ENSG00000164039	BDH2	protein_coding	Short-chain dehydrogenase/reductase SDR	3-hydroxybutyrate dehydrogenase, type 2		-1.06745	1.68449	68.2253	2.47049e-13
ENSG00000245573	BDNF-AS	antisense				1.82113	-0.860489	24.3862	2.63015e-06
ENSG00000145734	BDP1	protein_coding	SANT/Myb domain	B double prime 1, subunit of RNA polymerase III transcription initiation factor IIIB	B-DOUBLE PRIME 1, SUBUNIT OF RNA POLYMERASE III TRANSCRIPTION INITIATIONFACTOR IIIB; BDP1;;TRANSCRIPTION FACTOR-LIKE NUCLEAR REGULATOR; TFNR;;KIAA1689	0.0958601	5.69761	2.14098	0.146076
ENSG00000126581	BECN1	protein_coding	Atg6/Beclin	beclin 1	BECLIN 1; BECN1	-0.0328627	6.30748	0.822063	0.366431
ENSG00000183092	BEGAIN	protein_coding		brain enriched guanylate kinase associated		-0.560908	3.24449	21.5241	9.13624e-06
ENSG00000178409	BEND3	protein_coding	BEN domain	BEN domain containing 3	BEN DOMAIN-CONTAINING PROTEIN 3; BEND3;;KIAA1553	-1.28511	4.17373	255.365	2.92725e-31
ENSG00000151917	BEND6	protein_coding	BEN domain	BEN domain containing 6		-0.869944	0.307732	25.4238	1.68721e-06
ENSG00000167995	BEST1	protein_coding	Bestrophin	bestrophin 1	BESTROPHIN 1; BEST1;;VMD2 GENE;;TU15B	1.60614	2.54926	89.3159	4.10382e-16
ENSG00000105829	BET1	protein_coding	Target SNARE coiled-coil homology domain	Bet1 golgi vesicular membrane trafficking protein	BET1 GOLGI VESICULAR MEMBRANE-TRAFFICKING PROTEIN; BET1;;BET1, S. CEREVISIAE, HOMOLOG OF;;GOLGI VESICULAR MEMBRANE-TRAFFICKING PROTEIN p18	-0.193999	4.66947	4.86994	0.0292696
ENSG00000177951	BET1L	protein_coding	Target SNARE coiled-coil homology domain	Bet1 golgi vesicular membrane trafficking protein like	BET1-LIKE PROTEIN; BET1L;;GOLGI SNARE, 15-KD; GS15	0.0242922	6.32736	0.209142	0.648284
ENSG00000103429	BFAR	protein_coding	Sterile alpha motif domain	bifunctional apoptosis regulator		-0.847496	5.52041	491.462	7.99968e-44
ENSG00000198908	BHLHB9	protein_coding	Armadillo repeat-containing domain	basic helix-loop-helix domain containing, class B, 9	BASIC HELIX-LOOP-HELIX DOMAIN-CONTAINING PROTEIN, CLASS B, 9; BHLHB9;;p60 TRANSCRIPTION REGULATOR PROTEIN; p60TRP;;KIAA1701	0.431324	1.12765	5.59324	0.0196663
ENSG00000134107	BHLHE40	protein_coding	Orange domain	basic helix-loop-helix family member e40	BASIC HELIX-LOOP-HELIX FAMILY, MEMBER E40; BHLHE40;;BASIC HELIX-LOOP-HELIX DOMAIN-CONTAINING PROTEIN, CLASS B, 2; BHLHB2;;DEC1;;STRA13, MOUSE, HOMOLOG OF;;ENHANCER OF SPLIT- AND HAIRY-RELATED PROTEIN 2, RAT, HOMOLOG OF; SHARP2	1.19873	5.31802	187.098	4.50506e-26
ENSG00000123095	BHLHE41	protein_coding	Orange domain	basic helix-loop-helix family member e41	BASIC HELIX-LOOP-HELIX FAMILY, MEMBER E41; BHLHE41;;BASIC HELIX-LOOP-HELIX DOMAIN-CONTAINING PROTEIN, CLASS B, 3; BHLHB3DIFFERENTIALLY EXPRESSED IN CHONDROCYTES 2; DEC2;;ENHANCER OF SPLIT- AND HAIRY-RELATED PROTEIN 1, RAT, HOMOLOG OF; SHARP1	-1.7305	2.34454	170.41	1.25995e-24
ENSG00000237452	BHMG1	protein_coding	High mobility group box domain	basic helix-loop-helix and HMG-box containing 1		-2.00219	-1.04854	36.7783	1.64822e-08
ENSG00000151746	BICD1	protein_coding	Bicaudal-D protein, microtubule-associated	BICD cargo adaptor 1		0.136881	4.01353	5.62048	0.019377
ENSG00000185963	BICD2	protein_coding	Bicaudal-D protein, microtubule-associated	BICD cargo adaptor 2	BICAUDAL D, DROSOPHILA, HOMOLOG OF, 2; BICD2;;KIAA0699	0.0222747	6.63862	0.198909	0.656422
ENSG00000135127	BICDL1	protein_coding	HAP1, N-terminal	BICD family like cargo adaptor 1	BICD FAMILY-LIKE CARGO ADAPTOR 1; BICDL1;;BICAUDAL D-RELATED PROTEIN 1; BICDR1;;COILED-COIL DOMAIN-CONTAINING PROTEIN 64; CCDC64;;CCDC64A	3.76637	0.518324	109.411	1.66977e-18
ENSG00000162069	BICDL2	protein_coding		BICD family like cargo adaptor 2	BICD FAMILY-LIKE CARGO ADAPTOR 2; BICDL2;;BICAUDAL D-RELATED PROTEIN 2; BICDR2;;COILED-COIL DOMAIN-CONTAINING PROTEIN 64B; CCDC64B	2.34371	-0.91546	7.19137	0.00843695
ENSG00000015475	BID	protein_coding	BH3-interacting domain death agonist	BH3 interacting domain death agonist	BH3-INTERACTING DOMAIN DEATH AGONIST; BID	-0.865114	5.81379	287.497	2.22726e-33
ENSG00000100290	BIK	protein_coding	Apoptosis regulator, Bcl-2, BH3 motif, conserved site	BCL2 interacting killer	BCL2-INTERACTING KILLER; BIK;;NBK	-0.0297371	2.47198	0.0813975	0.775914
ENSG00000136717	BIN1	protein_coding	SH3 domain	bridging integrator 1	BRIDGING INTEGRATOR 1; BIN1;;AMPHIPHYSIN II; AMPH2;;BOX-DEPENDENT MYC-INTERACTING PROTEIN 1;;AMPHIPHYSIN-LIKE, FORMERLY; AMPHL, FORMERLY	-0.305007	2.36364	7.2233	0.00823951
ENSG00000110934	BIN2	protein_coding	Amphiphysin	bridging integrator 2	BRIDGING INTEGRATOR 2; BIN2	1.8181	7.24788	372.901	2.79447e-38
ENSG00000147439	BIN3	protein_coding	BAR domain	bridging integrator 3	BRIDGING INTEGRATOR 3; BIN3	-0.00431494	5.22308	0.00804698	0.928674
ENSG00000110330	BIRC2	protein_coding	BIR repeat	baculoviral IAP repeat containing 2	BACULOVIRAL IAP REPEAT-CONTAINING PROTEIN 2; BIRC2;;APOPTOSIS INHIBITOR 1; API1;;HIAP2;;CIAP1;;MAMMALIAN IAP HOMOLOG B; MIHB	0.808494	5.74507	110.836	1.15198e-18
ENSG00000023445	BIRC3	protein_coding	CARD domain	baculoviral IAP repeat containing 3	BACULOVIRAL IAP REPEAT-CONTAINING PROTEIN 3; BIRC3;;APOPTOSIS INHIBITOR 2; API2;;HIAP1;;CIAP2;;MAMMALIAN IAP HOMOLOG C; MIHCAPI2/MALT1 FUSION GENE, INCLUDED	-0.53857	1.65534	7.463	0.00726869
ENSG00000089685	BIRC5	protein_coding	BIR repeat	baculoviral IAP repeat containing 5	BACULOVIRAL IAP REPEAT-CONTAINING PROTEIN 5; BIRC5;;APOPTOSIS INHIBITOR 4; API4;;SURVIVIN	-0.594231	6.61701	63.024	1.34417e-12
ENSG00000115760	BIRC6	protein_coding	Ubiquitin-conjugating enzyme E2	baculoviral IAP repeat containing 6	BACULOVIRAL IAP REPEAT-CONTAINING PROTEIN 6; BIRC6;;APOLLON;;BRUCE, MOUSE, HOMOLOG OF; BRUCE;;KIAA1289	-0.159943	7.87012	6.7922	0.0103391
ENSG00000282851	BISPR	lincRNA				1.14601	0.0248698	27.0639	8.42829e-07
ENSG00000134897	BIVM	protein_coding		basic, immunoglobulin-like variable motif containing		-0.0851258	3.72577	1.12771	0.290439
ENSG00000166619	BLCAP	protein_coding	Bladder cancer-related BC10	bladder cancer associated protein	BLADDER CANCER-ASSOCIATED PROTEIN; BLCAP;;BLADDER CANCER-ASSOCIATED, 10-KD; BC10	0.154825	5.69691	9.86003	0.00213614
ENSG00000197299	BLM	protein_coding	Helicase, C-terminal	Bloom syndrome RecQ like helicase	RECQ PROTEIN-LIKE 3; RECQL3;;DNA HELICASE, RECQ-LIKE, TYPE 2; RECQ2;;BLM GENE; BLM	-0.404555	5.89751	30.1286	2.3604e-07
ENSG00000108578	BLMH	protein_coding	Cysteine peptidase, cysteine active site	bleomycin hydrolase	BLEOMYCIN HYDROLASE; BLMH;;BMH	-1.29019	6.85406	1110.67	9.10264e-62
ENSG00000135441	BLOC1S1	protein_coding	Biogenesis of lysosome-related organelles complex 1 subunit 1	biogenesis of lysosomal organelles complex 1 subunit 1	BIOGENESIS OF LYSOSOME-RELATED ORGANELLES COMPLEX 1, SUBUNIT 1; BLOC1S1;;BLOC1, SUBUNIT 1; BLOS1;;GCN5-LIKE 1; GCN5L1	0.410998	2.17328	18.7862	3.09908e-05
ENSG00000196072	BLOC1S2	protein_coding	Biogenesis of lysosome-related organelles complex-1, subunit 2	biogenesis of lysosomal organelles complex 1 subunit 2	BIOGENESIS OF LYSOSOME-RELATED ORGANELLES COMPLEX 1, SUBUNIT 2; BLOC1S2;;BLOC1, SUBUNIT 2; BLOS2	0.264469	5.42294	13.8796	0.000300868
ENSG00000189114	BLOC1S3	protein_coding	BLOC-1 complex, subunit 3	biogenesis of lysosomal organelles complex 1 subunit 3	BIOGENESIS OF LYSOSOME-RELATED ORGANELLES COMPLEX 1, SUBUNIT 3; BLOC1S3;;BLOC1, SUBUNIT 3; BLOS3;;REDUCED PIGMENTATION, MOUSE, HOMOLOG OF; RP;;HPS8 GENE; HPS8	0.880339	3.87387	154.464	3.66376e-23
ENSG00000186222	BLOC1S4	protein_coding	Cappuccino	biogenesis of lysosomal organelles complex 1 subunit 4	BIOGENESIS OF LYSOSOME-RELATED ORGANELLES COMPLEX 1, SUBUNIT 4; BLOC1S4;;BLOC1, SUBUNIT 4; BLOS4;;CAPPUCCINO, MOUSE, HOMOLOG OF; CNO	0.237026	4.09839	6.02068	0.0156045
ENSG00000188428	BLOC1S5	protein_coding	Biogenesis of lysosome-related organelles complex 1 subunit 5	biogenesis of lysosomal organelles complex 1 subunit 5	BIOGENESIS OF LYSOSOME-RELATED ORGANELLES COMPLEX 1, SUBUNIT 5; BLOC1S5;;BLOC1, SUBUNIT 5; BLOS5;;MUTED, MOUSE, HOMOLOG OF; MUTED	-0.467402	4.39859	33.7611	5.42618e-08
ENSG00000104164	BLOC1S6	protein_coding	BLOC-1 complex, pallidin subunit	biogenesis of lysosomal organelles complex 1 subunit 6	BIOGENESIS OF LYSOSOME-RELATED ORGANELLES COMPLEX 1, SUBUNIT 6;BLOC1S6;;BLOC1, SUBUNIT 6; BLOS6;;PALLIDIN; PLDN;;PA;;PALLID, MOUSE, HOMOLOG OF;;HPS9 GENE; HPS9	-0.138262	6.51997	3.77849	0.054303
ENSG00000090013	BLVRB	protein_coding	NAD(P)-binding domain	biliverdin reductase B	BILIVERDIN REDUCTASE B; BLVRB;;BVRB;;NADPH-FLAVIN REDUCTASE; FLR;;METHEMOGLOBIN REDUCTASE;;NADPH REDUCTASE	0.994908	3.83534	67.6455	2.97669e-13
ENSG00000117475	BLZF1	protein_coding	Golgin-45	basic leucine zipper nuclear factor 1	BASIC LEUCINE ZIPPER NUCLEAR FACTOR 1; BLZF1;;JEM1;;GOLGIN 45	0.183487	4.33302	5.48827	0.0208241
ENSG00000104081	BMF	protein_coding	Bcl-2-modifying factor	Bcl2 modifying factor	BCL2-MODIFYING FACTOR; BMF	-0.103471	5.75794	2.1023	0.149738
ENSG00000168283	BMI1	protein_coding	Zinc finger, RING-type	BMI1 proto-oncogene, polycomb ring finger	LEUKEMIA VIRAL BMI-1 ONCOGENE, MOUSE, HOMOLOG OF; BMI1	-0.00790273	4.86191	0.00883137	0.925289
ENSG00000168487	BMP1	protein_coding	EGF-type aspartate/asparagine hydroxylation site	bone morphogenetic protein 1	BONE MORPHOGENETIC PROTEIN 1; BMP1;;TOLLOID, DROSOPHILA, HOMOLOG OF; TLD;;PROCOLLAGEN C-PROTEINASE	-0.0539048	4.82647	0.447842	0.504673
ENSG00000138756	BMP2K	protein_coding	Protein kinase domain	BMP2 inducible kinase		0.253589	6.78471	20.164	1.66955e-05
ENSG00000153162	BMP6	protein_coding	Transforming growth factor-beta, N-terminal	bone morphogenetic protein 6	BONE MORPHOGENETIC PROTEIN 6; BMP6;;VG1-RELATED SEQUENCE; VGR1	-0.787869	-0.8384	8.75697	0.00376647
ENSG00000107779	BMPR1A	protein_coding	Ser/Thr protein kinase, TGFB receptor	bone morphogenetic protein receptor type 1A	BONE MORPHOGENETIC PROTEIN RECEPTOR, TYPE IA; BMPR1A;;ACTIVIN A RECEPTOR, TYPE II-LIKE KINASE 3; ACVRLK3;;ACTIVIN RECEPTOR-LIKE KINASE 3; ALK3	-0.0155905	4.51923	0.0555833	0.814028
ENSG00000204217	BMPR2	protein_coding	Ser/Thr protein kinase, TGFB receptor	bone morphogenetic protein receptor type 2	BONE MORPHOGENETIC PROTEIN RECEPTOR, TYPE II; BMPR2	0.505733	6.11748	50.2799	1.06858e-10
ENSG00000165733	BMS1	protein_coding	Ribosome biogenesis protein BMS1/TSR1, C-terminal	BMS1, ribosome biogenesis factor	BMS1, RIBOSOME ASSEMBLY PROTEIN, S. CEREVISIAE, HOMOLOG OF; BMS1;;RIBOSOME BIOGENESIS PROTEIN BMS1;;BMS1-LIKE; BMS1L;;KIAA0187	-0.741824	7.07426	258.481	1.7912e-31
ENSG00000204177	BMS1P1	transcribed_unprocessed_pseudogene				0.677141	-0.0172441	7.79967	0.00610117
ENSG00000164603	BMT2	protein_coding	25S rRNA (adenine(2142)-N(1))-methyltransferase, Bmt2	base methyltransferase of 25S rRNA 2 homolog		0.582125	4.91286	34.654	3.80336e-08
ENSG00000102010	BMX	protein_coding	Protein kinase domain	BMX non-receptor tyrosine kinase		2.26595	-1.88864	5.33212	0.0232084
ENSG00000173068	BNC2	protein_coding	Zinc finger, C2H2	basonuclin 2	BASONUCLIN 2; BNC2	0.992866	1.60597	41.6612	2.5272e-09
ENSG00000113734	BNIP1	protein_coding	Sec20	BCL2 interacting protein 1	BCL2/ADENOVIRUS E1B 19-KD PROTEIN-INTERACTING PROTEIN 1; BNIP1;;NIP1	-0.89109	3.50266	124.839	3.38338e-20
ENSG00000140299	BNIP2	protein_coding	CRAL-TRIO lipid binding domain	BCL2 interacting protein 2	BCL2/ADENOVIRUS E1B 19-KD PROTEIN-INTERACTING PROTEIN 2; BNIP2;;NIP2	-0.0857173	7.40409	1.90817	0.169784
ENSG00000176171	BNIP3	protein_coding	BNIP3	BCL2 interacting protein 3	BCL2/ADENOVIRUS E1B 19-KD PROTEIN-INTERACTING PROTEIN 3; BNIP3;;NIP3	-0.454046	5.02785	8.73586	0.00379669
ENSG00000104765	BNIP3L	protein_coding	BNIP3	BCL2 interacting protein 3 like	BCL2/ADENOVIRUS E1B 19-KD PROTEIN-INTERACTING PROTEIN 3-LIKE; BNIP3L;;NIX	1.56902	6.4193	249.102	7.9565e-31
ENSG00000163141	BNIPL	protein_coding	CRAL-TRIO lipid binding domain	BCL2 interacting protein like	BCL2/ADENOVIRUS E1B 19-KD PROTEIN-INTERACTING PROTEIN 2-LIKE; BNIPL;;BNIP2-SIMILAR; BNIPS;;BNIPL1;;BNIPL2	0.818138	-0.516834	8.40863	0.00445715
ENSG00000145919	BOD1	protein_coding	Biorientation of chromosomes in cell division protein 1-like	biorientation of chromosomes in cell division 1	BIORIENTATION OF CHROMOSOMES IN CELL DIVISION 1; BOD1;;BIORIENTATION DEFECTIVE 1;;FAMILY WITH SEQUENCE SIMILARITY 44, MEMBER B; FAM44B	-0.668461	4.4605	162.018	7.24521e-24
ENSG00000038219	BOD1L1	protein_coding	Biorientation of chromosomes in cell division protein 1-like	biorientation of chromosomes in cell division 1 like 1	BOD1-LIKE PROTEIN 1; BOD1L1;;BOD1L;;FAMILY WITH SEQUENCE SIMILARITY 4, MEMBER A; FAM44A	0.945569	7.99815	172.39	8.39981e-25
ENSG00000163170	BOLA3	protein_coding	BolA protein	bolA family member 3	BolA, E. COLI, HOMOLOG OF, 3; BOLA3	-1.29401	2.71059	144.981	2.99279e-22
ENSG00000267332	BOLA3P2	processed_pseudogene				-1.41835	0.145892	55.8473	1.51566e-11
ENSG00000213630	BOLA3P3	processed_pseudogene				-1.49947	1.47483	126.336	2.3488e-20
ENSG00000261236	BOP1	protein_coding	WD40 repeat	microRNA 7112	BLOCK OF PROLIFERATION 1; BOP1;;KIAA0124	-1.95174	6.67364	286.401	4.53072e-33
ENSG00000136122	BORA	protein_coding	Aurora borealis protein	bora, aurora kinase A activator	AURORA BOREALIS; BORA;;CHROMOSOME 13 OPEN READING FRAME 34; C13ORF34	-0.255431	5.30705	11.8997	0.000780095
ENSG00000165714	BORCS5	protein_coding	Tumour suppressor protein, LOH1CR12	BLOC-1 related complex subunit 5	BLOC1-RELATED COMPLEX, SUBUNIT 5; BORCS5;;BORC, SUBUNIT 5;;LOSS OF HETEROZYGOSITY, CHROMOSOME 12, REGION 1; LOH12CR1;;MYRISTOYLATED LYSOSOMAL PROTEIN; MYRLYSIN	-0.219274	2.78371	9.19757	0.00298199
ENSG00000196544	BORCS6	protein_coding	Protein of unknown function DUF2365	BLOC-1 related complex subunit 6	BLOC1-RELATED COMPLEX, SUBUNIT 6; BORCS6;;BORC, SUBUNIT 6;;CHROMOSOME 17 OPEN READING FRAME 59; C17ORF59;;LYSOSOME-DISPERSING PROTEIN; LYSPERSIN	0.929113	3.78562	82.7038	2.83135e-15
ENSG00000166275	BORCS7	protein_coding	Uncharacterised protein family UPF0693	BLOC-1 related complex subunit 7	BLOC1-RELATED COMPLEX, SUBUNIT 7; BORCS7;;BORC, SUBUNIT 7;;CHROMOSOME 10 OPEN READING FRAME 32; C10ORF32;;DIASKEDIN	-0.0360817	4.33252	0.132728	0.716274
ENSG00000254901	BORCS8	protein_coding	Uncharacterised protein family UPF0402	BLOC-1 related complex subunit 8	BLOC1-RELATED COMPLEX, SUBUNIT 8; BORCS8;;BORC, SUBUNIT 8;;MEF2B NEIGHBOR GENE; MEF2BNB	0.581956	1.33651	15.1608	0.000164311
ENSG00000172331	BPGM	protein_coding	Phosphoglycerate/bisphosphoglycerate mutase, active site	bisphosphoglycerate mutase	BISPHOSPHOGLYCERATE MUTASE; BPGM;;2,3-@BISPHOSPHOGLYCERATE PHOSPHATASE;;2,3-@BPG PHOSPHATASE;;2,3-@DIPHOSPHOGLYCERATE MUTASE; DPGM	-0.248536	3.99538	12.094	0.000709753
ENSG00000137274	BPHL	protein_coding	Alpha/beta hydrolase fold-1	biphenyl hydrolase like	BIPHENYL HYDROLASE-LIKE; BPHL;;VALACYCLOVIRASE;;MUCIN-ASSOCIATED ANTIGEN; MCNAA;;BREAST EPITHELIAL MUCIN-ASSOCIATED ANTIGEN	-0.21789	2.48753	4.59207	0.03418
ENSG00000101425	BPI	protein_coding		bactericidal/permeability-increasing protein	BACTERICIDAL PERMEABILITY-INCREASING PROTEIN; BPI	1.15227	5.26289	101.231	1.5078e-17
ENSG00000162813	BPNT1	protein_coding	Inositol monophosphatase	3'(2'), 5'-bisphosphate nucleotidase 1	3-PRIME(2-PRIME),5-PRIME-@BISPHOSPHATE NUCLEOTIDASE 1; BPNT1;;BISPHOSPHATE 3-PRIME-NUCLEOTIDASE	-0.262259	4.8818	17.4775	5.61915e-05
ENSG00000171634	BPTF	protein_coding	Zinc finger, PHD-type	bromodomain PHD finger transcription factor	BROMODOMAIN PHD FINGER TRANSCRIPTION FACTOR; BPTF;;FETAL ALZHEIMER ANTIGEN; FALZ;;FAC1;;NURF301, DROSOPHILA, HOMOLOG OF; NURF301;;BROMODOMAIN AND PHD DOMAIN TRANSCRIPTION FACTOR	0.624801	7.55416	118.127	1.78711e-19
ENSG00000157764	BRAF	protein_coding	Protein kinase domain	B-Raf proto-oncogene, serine/threonine kinase	V-RAF MURINE SARCOMA VIRAL ONCOGENE HOMOLOG B1; BRAF;;ONCOGENE BRAF;;BRAF1;;RAFB1BRAF/AKAP9 FUSION GENE, INCLUDED;;BRAF/KIAA1549 FUSION GENE, INCLUDED	0.488901	6.48895	55.281	1.84314e-11
ENSG00000089234	BRAP	protein_coding	Zinc finger, UBP-type	BRCA1 associated protein	BRCA1-ASSOCIATED PROTEIN; BRAP;;BRAP2;;IMPEDES MITOGENIC SIGNAL PROPAGATION; IMP	-0.231033	5.70155	41.1315	3.08784e-09
ENSG00000106009	BRAT1	protein_coding	HEAT repeat	BRCA1 associated ATM activator 1	BRCA1-ASSOCIATED ATM ACTIVATOR 1; BRAT1;;BAAT1;;CHROMOSOME 7 OPEN READING FRAME 27; C7ORF27	0.00415684	6.40441	0.00262384	0.959234
ENSG00000012048	BRCA1	protein_coding	BRCT domain	BRCA1, DNA repair associated	BREAST CANCER 1 GENE; BRCA1	-0.0703229	6.56007	1.09171	0.298235
ENSG00000139618	BRCA2	protein_coding	BRCA2 repeat	BRCA2, DNA repair associated	BRCA2 GENE; BRCA2;;FANCD1 GENE; FANCD1	0.00396723	6.3736	0.0019534	0.964822
ENSG00000185515	BRCC3	protein_coding	JAB1/MPN/MOV34 metalloenzyme domain	BRCA1/BRCA2-containing complex subunit 3	BRCA1/BRCA2-CONTAINING COMPLEX, SUBUNIT 3; BRCC3;;C6.1A;;BRCC36	-0.223421	3.90654	14.6507	0.00020884
ENSG00000100425	BRD1	protein_coding	Bromodomain	bromodomain containing 1	BROMODOMAIN-CONTAINING PROTEIN 1; BRD1;;BR140-LIKE GENE; BRL	0.242162	6.69048	26.154	1.23729e-06
ENSG00000204256	BRD2	protein_coding	Bromodomain	bromodomain containing 2	BROMODOMAIN-CONTAINING PROTEIN 2; BRD2;;FEMALE STERILE HOMEOTIC-RELATED GENE 1, MOUSE, HOMOLOG OF; FSRG1;;RING3	0.374669	8.7577	75.0755	2.85627e-14
ENSG00000169925	BRD3	protein_coding	Bromodomain	bromodomain containing 3	BROMODOMAIN-CONTAINING PROTEIN 3; BRD3;;RING3-LIKE GENE; RING3L;;OPEN READING FRAME X; ORFX	-0.266759	7.05942	41.8927	2.31584e-09
ENSG00000141867	BRD4	protein_coding	Bromodomain	bromodomain containing 4	BROMODOMAIN-CONTAINING PROTEIN 4; BRD4;;MITOTIC CHROMOSOME-ASSOCIATED PROTEIN; MCAP; CAP;;HUNK1BRD4/NUT FUSION GENE, INCLUDED	0.0419222	7.31408	0.59309	0.44277
ENSG00000166164	BRD7	protein_coding		bromodomain containing 7		-0.229997	6.88734	34.8274	3.55068e-08
ENSG00000184100	BRD7P2	processed_pseudogene				0.0698653	1.08469	0.201487	0.654349
ENSG00000112983	BRD8	protein_coding	Bromodomain	bromodomain containing 8	BROMODOMAIN-CONTAINING PROTEIN 8; BRD8;;SKELETAL MUSCLE ABUNDANT PROTEIN; SMAP;;THYROID HORMONE RECEPTOR-INTERACTING PROTEIN p120	0.512925	5.50313	145.217	2.8377e-22
ENSG00000028310	BRD9	protein_coding		bromodomain containing 9		-0.196463	5.53673	18.1074	4.21561e-05
ENSG00000158019	BRE	protein_coding	Brain/reproductive organ-expressed protein	brain and reproductive organ-expressed (TNFRSF1A modulator)	BRAIN AND REPRODUCTIVE ORGAN-EXPRESSED PROTEIN; BRE;;BRCC4;;BRCC45	-0.253891	4.40237	24.7782	2.22297e-06
ENSG00000185024	BRF1	protein_coding	Transcription factor TFIIB	BRF1, RNA polymerase III transcription initiation factor 90 kDa subunit		-0.00711702	5.58841	0.00866975	0.925973
ENSG00000104221	BRF2	protein_coding	Transcription factor TFIIB	BRF2, RNA polymerase III transcription initiation factor 50 kDa subunit	BRF2 SUBUNIT OF RNA POLYMERASE III TRANSCRIPTION INITIATION FACTOR;BRF2;;BRFU;;TRANSCRIPTION FACTOR IIB-RELATED FACTOR; TFIIIB50	-0.45107	4.31722	48.6692	1.90437e-10
ENSG00000164713	BRI3	protein_coding	Brain protein I3	brain protein I3	BRAIN PROTEIN I3; BRI3	1.10809	5.91777	190.867	2.17809e-26
ENSG00000184992	BRI3BP	protein_coding	BRI3-binding protein	BRI3 binding protein	BRI3-BINDING PROTEIN; BRI3BP	0.248247	7.69164	29.3113	3.30444e-07
ENSG00000225169	BRI3P1	processed_pseudogene				1.12458	3.24472	18.4294	3.72167e-05
ENSG00000182685	BRICD5	protein_coding	BRICHOS domain	BRICHOS domain containing 5		3.09755	1.48973	178.111	2.64562e-25
ENSG00000136492	BRIP1	protein_coding	Helicase-like, DEXD box c2 type	BRCA1 interacting protein C-terminal helicase 1	BRCA1-INTERACTING PROTEIN 1; BRIP1;;BRCA1-ASSOCIATED C-TERMINAL HELICASE 1; BACH1;;DELETIONS OF GUANINE-RICH DNA, C. ELEGANS, HOMOLOG OF;;DOG1, HOMOLOG OF;;FANCJ GENE; FANCJ	0.147517	5.37757	2.42056	0.122438
ENSG00000113460	BRIX1	protein_coding	Anticodon-binding	BRX1, biogenesis of ribosomes		-1.40381	5.64576	306.343	1.52181e-34
ENSG00000254025	BRIX1P1	processed_pseudogene				-1.32264	-0.0201218	36.1931	2.07256e-08
ENSG00000254999	BRK1	protein_coding	Protein BRICK1	BRICK1, SCAR/WAVE actin nucleating complex subunit	BRICK1, SCAR/WAVE ACTIN-NUCLEATING COMPLEX SUBUNIT; BRK1;;BRICK1;;C3ORF10 GENE; C3ORF10;;HSPC300	0.162716	6.63385	18.9656	2.85792e-05
ENSG00000174744	BRMS1	protein_coding	Sds3-like	breast cancer metastasis suppressor 1	BREAST CANCER METASTASIS SUPPRESSOR 1; BRMS1	-0.567497	5.52652	70.992	1.02359e-13
ENSG00000100916	BRMS1L	protein_coding	Sds3-like	breast cancer metastasis-suppressor 1-like		-0.233089	2.84737	4.92789	0.028343
ENSG00000162819	BROX	protein_coding	BRO1 domain	BRO1 domain and CAAX motif containing		0.184698	6.04697	6.60212	0.0114351
ENSG00000156983	BRPF1	protein_coding	PWWP domain	bromodomain and PHD finger containing 1	BROMODOMAIN- AND PHD FINGER-CONTAINING PROTEIN; BRPF1;;BROMODOMAIN-CONTAINING PROTEIN, 140-KD; BR140;;PEREGRIN	-0.127461	6.45038	4.91197	0.0285944
ENSG00000096070	BRPF3	protein_coding	PWWP domain	bromodomain and PHD finger containing 3	BROMODOMAIN- AND PHD FINGER-CONTAINING PROTEIN 3; BRPF3;;KIAA1286	0.600126	5.71102	101.181	1.49454e-17
ENSG00000160469	BRSK1	protein_coding	Protein kinase domain	BR serine/threonine kinase 1	BR SERINE/THREONINE KINASE 1; BRSK1;;KIAA1811	0.0741351	-0.178631	0.071034	0.790304
ENSG00000185658	BRWD1	protein_coding	Bromodomain	bromodomain and WD repeat domain containing 1		0.306145	6.2713	20.3267	1.55279e-05
ENSG00000165288	BRWD3	protein_coding	Bromodomain	bromodomain and WD repeat domain containing 3	BROMODOMAIN- AND WD REPEAT-CONTAINING PROTEIN 3; BRWD3	0.0652295	6.46047	0.632981	0.427866
ENSG00000168000	BSCL2	protein_coding		BSCL2, seipin lipid droplet biogenesis associated	BSCL2 GENE; BSCL2;;SEIPIN;;GNG3LG, MOUSE, HOMOLOG OF	0.936362	0.0678369	17.0735	6.76293e-05
ENSG00000160058	BSDC1	protein_coding	BSD domain	BSD domain containing 1		0.678723	6.08059	195.14	9.65644e-27
ENSG00000172270	BSG	protein_coding	Immunoglobulin subtype	basigin (Ok blood group)	BASIGIN; BSG;;TCSF;;EXTRACELLULAR MATRIX METALLOPROTEINASE INDUCER; EMMPRIN;;M6 LEUKOCYTE ACTIVATION ANTIGEN; M6;;CD147 ANTIGEN; CD147	-0.332493	9.36062	32.6885	8.34112e-08
ENSG00000164061	BSN	protein_coding	Zinc finger, piccolo-type	bassoon presynaptic cytomatrix protein	BASSOON, MOUSE, HOMOLOG OF; BSN;;ZINC FINGER PROTEIN 231; ZNF231	1.8447	-0.241839	37.8683	1.07847e-08
ENSG00000109743	BST1	protein_coding	ADP-ribosyl cyclase (CD38/157)	bone marrow stromal cell antigen 1	BONE MARROW STROMAL CELL ANTIGEN 1; BST1;;CD157	2.19115	4.57226	356.877	1.98186e-37
ENSG00000130303	BST2	protein_coding	Bone marrow stromal antigen 2	bone marrow stromal cell antigen 2	BONE MARROW STROMAL CELL ANTIGEN 2; BST2;;TETHERIN;;CD317 ANTIGEN; CD317	0.320892	6.53782	23.768	3.43294e-06
ENSG00000095564	BTAF1	protein_coding	SNF2-related, N-terminal domain	B-TFIID TATA-box binding protein associated factor 1	BTAF1 RNA POLYMERASE II, B-TFIID TRANSCRIPTION FACTOR-ASSOCIATED,170-KD; BTAF1;;TATA BOX-BINDING PROTEIN-ASSOCIATED FACTOR, RNA POLYMERASE II, 170-KD;;TAFII170;;TAF172;;MOT1, YEAST, HOMOLOG OF	0.122384	6.53055	3.81408	0.0531981
ENSG00000064726	BTBD1	protein_coding	BTB/POZ domain	BTB domain containing 1	BTB/POZ DOMAIN-CONTAINING PROTEIN 1; BTBD1	0.134683	7.30108	6.85101	0.0100227
ENSG00000148925	BTBD10	protein_coding	BTB/POZ domain	BTB domain containing 10	BTB/POZ DOMAIN-CONTAINING PROTEIN 10; BTBD10	0.761762	4.54255	186.895	4.68613e-26
ENSG00000257675	BTBD10P1	processed_pseudogene				0.756048	1.5056	29.4789	3.0836e-07
ENSG00000151136	BTBD11	protein_coding	BTB/POZ domain	BTB domain containing 11		-0.287344	-0.389624	0.264269	0.608413
ENSG00000133243	BTBD2	protein_coding	BTB/POZ domain	BTB domain containing 2	BTB/POZ DOMAIN-CONTAINING PROTEIN 2; BTBD2	0.553584	6.88155	33.9172	5.09935e-08
ENSG00000132640	BTBD3	protein_coding	BTB/POZ domain	BTB domain containing 3	BTB/POZ DOMAIN-CONTAINING PROTEIN 3; BTBD3;;KIAA0952	-0.134812	4.62275	4.76019	0.0311135
ENSG00000184887	BTBD6	protein_coding	BTB/POZ domain	BTB domain containing 6		0.239455	5.28742	19.8049	1.96015e-05
ENSG00000229106	BTBD6P1	processed_pseudogene				1.71254	1.11986	59.8976	3.81354e-12
ENSG00000011114	BTBD7	protein_coding		BTB domain containing 7	BTB/POZ DOMAIN-CONTAINING PROTEIN 7; BTBD7;;FUP1	0.130553	6.39246	8.01115	0.00546879
ENSG00000189195	BTBD8	protein_coding	BTB/POZ domain	BTB domain containing 8		1.36496	0.124373	27.2411	7.82362e-07
ENSG00000183826	BTBD9	protein_coding	BTB/POZ domain	BTB domain containing 9	BTB/POZ DOMAIN-CONTAINING PROTEIN 9; BTBD9;;KIAA1880	0.592387	4.73403	91.8951	1.96521e-16
ENSG00000169814	BTD	protein_coding	Biotinidase, eukaryotic	biotinidase	BIOTINIDASE; BTD	0.440435	3.17417	37.0548	1.47966e-08
ENSG00000145741	BTF3	protein_coding	Nascent polypeptide-associated complex NAC domain	basic transcription factor 3	BASIC TRANSCRIPTION FACTOR 3; BTF3;;NASCENT POLYPEPTIDE-ASSOCIATED COMPLEX, BETA POLYPEPTIDE; NACB;;BETA-NACBTF3A, INCLUDED;;BTF3B, INCLUDED	-0.609676	8.49441	151.196	7.49117e-23
ENSG00000134717	BTF3L4	protein_coding	Nascent polypeptide-associated complex NAC domain	basic transcription factor 3 like 4		-0.368107	6.422	33.1525	6.92251e-08
ENSG00000133639	BTG1	protein_coding	Anti-proliferative protein	BTG anti-proliferation factor 1	B-CELL TRANSLOCATION GENE 1; BTG1	0.715784	7.54081	102.151	1.14939e-17
ENSG00000159388	BTG2	protein_coding	Anti-proliferative protein	BTG anti-proliferation factor 2	B-CELL TRANSLOCATION GENE 2; BTG2;;PHEOCHROMOCYTOMA CELL 3; PC3	2.4931	6.17326	294.773	1.48683e-33
ENSG00000154640	BTG3	protein_coding	Anti-proliferative protein	BTG anti-proliferation factor 3	B-CELL TRANSLOCATION GENE 3; BTG3;;ABUNDANT IN NEUROEPITHELIUM AREA; ANA;;TOB5	-0.519727	3.07495	35.1576	3.11586e-08
ENSG00000010671	BTK	protein_coding	Protein kinase domain	Bruton tyrosine kinase	BRUTON AGAMMAGLOBULINEMIA TYROSINE KINASE; BTK;;AGAMMAGLOBULINEMIA TYROSINE KINASE; ATK;;B-CELL PROGENITOR KINASE; BPK	-0.225013	7.38056	30.7139	1.85749e-07
ENSG00000112763	BTN2A1	protein_coding	Immunoglobulin subtype	butyrophilin subfamily 2 member A1	BUTYROPHILIN, SUBFAMILY 2, MEMBER A1; BTN2A1;;BT2.1;;BTF1	0.832785	5.4564	222.586	6.69923e-29
ENSG00000124508	BTN2A2	protein_coding	Immunoglobulin subtype	butyrophilin subfamily 2 member A2	BUTYROPHILIN, SUBFAMILY 2, MEMBER A2; BTN2A2;;BTF2;;BT2.2	0.320836	2.7244	16.5208	8.72474e-05
ENSG00000124549	BTN2A3P	transcribed_unprocessed_pseudogene				0.832111	1.34872	36.001	2.2349e-08
ENSG00000026950	BTN3A1	protein_coding	Immunoglobulin subtype	butyrophilin subfamily 3 member A1	BUTYROPHILIN, SUBFAMILY 3, MEMBER A1; BTN3A1;;BT3.1;;BTF5;;CD277	0.816043	4.45225	160.87	9.24254e-24
ENSG00000186470	BTN3A2	protein_coding	Immunoglobulin-like domain	butyrophilin subfamily 3 member A2	BUTYROPHILIN, SUBFAMILY 3, MEMBER A2; BTN3A2;;BT3.2;;BTF4	0.223108	5.29011	20.4244	1.48672e-05
ENSG00000111801	BTN3A3	protein_coding	Immunoglobulin subtype	butyrophilin subfamily 3 member A3	BUTYROPHILIN, SUBFAMILY 3, MEMBER A3; BTN3A3;;BTF3	0.221145	3.44944	11.3114	0.00104015
ENSG00000113303	BTNL8	protein_coding	Immunoglobulin subtype	butyrophilin like 8	BUTYROPHILIN-LIKE PROTEIN 8; BTNL8;;BTN9.2	1.58272	0.0830319	6.76153	0.0105083
ENSG00000166167	BTRC	protein_coding	WD40 repeat	beta-transducin repeat containing E3 ubiquitin protein ligase	BETA-TRANSDUCIN REPEAT-CONTAINING PROTEIN; BTRC;;BETA-TRCP;;BTRCP; BTRCP1;;SLIMB, DROSOPHILA, HOMOLOG OF;;F-BOX AND WD40 DOMAIN PROTEIN 1A; FBXW1A; FBW1A;;FBXW1	0.193144	4.95177	13.2761	0.000401295
ENSG00000169679	BUB1	protein_coding	Protein kinase domain	BUB1 mitotic checkpoint serine/threonine kinase	BUDDING UNINHIBITED BY BENZIMIDAZOLES 1, S. CEREVISIAE, HOMOLOG OF;BUB1;;BUB1, S. CEREVISIAE, HOMOLOG OF;;MITOTIC CHECKPOINT GENE BUB1;;BUB1A	-0.243335	6.72045	10.2016	0.00180088
ENSG00000156970	BUB1B	protein_coding	Protein kinase domain	BUB1 mitotic checkpoint serine/threonine kinase B	BUDDING UNINHIBITED BY BENZIMIDAZOLES 1, S. CEREVISIAE, HOMOLOG OF,BETA; BUB1B;;BUB1, S. CEREVISIAE, HOMOLOG OF, BETA;;MITOTIC CHECKPOINT GENE BUB1B;;BUBR1	-0.149246	6.22678	3.01258	0.0852386
ENSG00000154473	BUB3	protein_coding	WD40 repeat	BUB3, mitotic checkpoint protein	BUDDING UNINHIBITED BY BENZIMIDAZOLES 3, S. CEREVISIAE, HOMOLOG OF;BUB3	-0.360794	7.60097	58.7845	5.5537e-12
ENSG00000137656	BUD13	protein_coding		BUD13 homolog		-0.119742	5.08228	7.02778	0.00913067
ENSG00000106245	BUD31	protein_coding	G10 protein	BUD31 homolog	BUD31, S. CEREVISIAE, HOMOLOG OF; BUD31;;G10 MATERNAL TRANSCRIPT, XENOPUS, HOMOLOG OF	-0.320173	5.83783	64.1449	9.29116e-13
ENSG00000215447	BX322557.10	processed_transcript				1.1501	-0.566384	12.0425	0.000727739
ENSG00000223723	BX842568.2	processed_pseudogene				-0.879605	4.68286	210.199	5.99487e-28
ENSG00000112578	BYSL	protein_coding	Bystin	bystin like	BY THE RIBOSOMAL PROTEIN S6 GENE, DROSOPHILA, HOMOLOG-LIKE; BYSL;;BYSTIN	-1.21098	5.24474	223.941	5.29693e-29
ENSG00000082153	BZW1	protein_coding		basic leucine zipper and W2 domains 1		-0.421883	7.76556	48.8301	1.79706e-10
ENSG00000198406	BZW1P2	processed_pseudogene				-0.576126	0.0764123	10.2668	0.00174332
ENSG00000136261	BZW2	protein_coding	W2 domain	basic leucine zipper and W2 domains 2		-1.60926	6.59674	446.76	7.15273e-42
ENSG00000214688	C10orf105	protein_coding		chromosome 10 open reading frame 105		3.36163	-1.0185	14.1352	0.000287053
ENSG00000148655	C10orf11	protein_coding	Leucine-rich repeat	chromosome 10 open reading frame 11	CHROMOSOME 10 OPEN READING FRAME 11; C10ORF11	1.36522	3.09414	230.402	1.75075e-29
ENSG00000204161	C10orf128	protein_coding	Protein of unknown function DUF4514	chromosome 10 open reading frame 128		-1.83104	1.81636	218.029	1.48612e-28
ENSG00000107738	C10orf54	protein_coding	Immunoglobulin subtype	chromosome 10 open reading frame 54	CHROMOSOME 10 OPEN READING FRAME 54; C10ORF54;;DEATH DOMAIN 1-ALPHA; DD1-ALPHA	2.66704	7.79261	367.936	1.79867e-37
ENSG00000120029	C10orf76	protein_coding	Domain of unknown function DUF1741	chromosome 10 open reading frame 76		0.034196	5.50475	0.76501	0.383547
ENSG00000119965	C10orf88	protein_coding	Protein of unknown function DUF4506	chromosome 10 open reading frame 88		0.0583302	3.72363	0.576129	0.449352
ENSG00000180066	C10orf91	lincRNA				-0.0651003	2.63014	0.270958	0.603668
ENSG00000137720	C11orf1	protein_coding	Uncharacterised protein family UPF0686	chromosome 11 open reading frame 1		-0.503372	3.16167	35.8716	2.35145e-08
ENSG00000110665	C11orf21	protein_coding	Protein of unknown function DUF4620	chromosome 11 open reading frame 21	CHROMOSOME 11 OPEN READING FRAME 21; C11ORF21	1.85696	5.56158	326.767	9.47766e-36
ENSG00000171067	C11orf24	protein_coding		chromosome 11 open reading frame 24	CHROMOSOME 11 OPEN READING FRAME 24; C11ORF24	-0.655295	4.05255	73.9043	4.10708e-14
ENSG00000174370	C11orf45	protein_coding		chromosome 11 open reading frame 45		-0.207736	-0.123091	0.741419	0.391103
ENSG00000149179	C11orf49	protein_coding		chromosome 11 open reading frame 49		-0.38957	3.80485	23.7356	3.48123e-06
ENSG00000182919	C11orf54	protein_coding	Domain of unknown function DUF1907	chromosome 11 open reading frame 54	CHROMOSOME 11 OPEN READING FRAME 54; C11ORF54;;PTD012	0.239899	4.31089	9.38015	0.00271913
ENSG00000150776	C11orf57	protein_coding		chromosome 11 open reading frame 57		-0.844535	5.88294	280.287	6.42883e-33
ENSG00000110696	C11orf58	protein_coding	Small acidic protein	chromosome 11 open reading frame 58		-0.324212	7.47477	36.8972	1.57346e-08
ENSG00000109944	C11orf63	protein_coding		chromosome 11 open reading frame 63		1.79022	0.359884	25.815	1.47294e-06
ENSG00000175573	C11orf68	protein_coding	Protein of unknown function DUF1917	chromosome 11 open reading frame 68		0.652681	4.71442	45.9237	5.17032e-10
ENSG00000180425	C11orf71	protein_coding	Protein of unknown function DUF4687	chromosome 11 open reading frame 71		0.867632	0.669605	21.6909	8.48957e-06
ENSG00000166352	C11orf74	protein_coding		chromosome 11 open reading frame 74		-0.284165	3.34021	10.6704	0.0014267
ENSG00000173715	C11orf80	protein_coding		chromosome 11 open reading frame 80	CHROMOSOME 11 OPEN READING FRAME 80; C11ORF80;;TOPOISOMERASE VI-B LIKE; TOPOVIBL;;TOPOVIB;;TOP6BLFRAGILE SITE, FOLIC ACID TYPE, RARE, FRA(11)(q13.3), INCLUDED;FRA11A, INCLUDED	0.833026	1.28156	34.1187	4.70505e-08
ENSG00000188070	C11orf95	protein_coding	Zinc finger, C2H2-like	chromosome 11 open reading frame 95	CHROMOSOME 11 OPEN READING FRAME 95; C11ORF95C11ORF95/MKL2 FUSION GENE, INCLUDED;;C11ORF95/RELA FUSION GENE, INCLUDED	-0.931471	4.6368	133.11	4.63477e-21
ENSG00000187479	C11orf96	protein_coding		chromosome 11 open reading frame 96		-1.00007	0.0325266	16.2715	9.7918e-05
ENSG00000139637	C12orf10	protein_coding	Metal-dependent protein hydrolase	chromosome 12 open reading frame 10	CHROMOSOME 12 OPEN READING FRAME 10; C12ORF10;;MELANOCYTE PROLIFERATING GENE 1, MOUSE, HOMOLOG OF; MYG1	-0.730885	4.81264	126.292	2.37388e-20
ENSG00000133641	C12orf29	protein_coding		chromosome 12 open reading frame 29		-0.9758	4.74488	110.133	1.38295e-18
ENSG00000047621	C12orf4	protein_coding	Protein of unknown function DUF2362	chromosome 12 open reading frame 4	CHROMOSOME 12 OPEN READING FRAME 4; C12ORF4	-0.31625	4.49345	21.7849	8.1457e-06
ENSG00000157895	C12orf43	protein_coding	Uncharacterised protein C12orf43	chromosome 12 open reading frame 43		-0.735183	4.25957	137.69	1.5857e-21
ENSG00000151131	C12orf45	protein_coding	Protein of unknown function DUF4598	chromosome 12 open reading frame 45		-1.05205	3.07219	204.327	1.74464e-27
ENSG00000111412	C12orf49	protein_coding	Uncharacterised protein family UPF0454	chromosome 12 open reading frame 49		0.388283	5.90022	80.1292	6.11391e-15
ENSG00000111678	C12orf57	protein_coding	Protein C10	chromosome 12 open reading frame 57	CHROMOSOME 12 OPEN READING FRAME 57; C12ORF57;;C10	-0.274509	5.36605	18.1359	4.16131e-05
ENSG00000182993	C12orf60	protein_coding	Protein of unknown function DUF4533	chromosome 12 open reading frame 60		-1.33665	-0.525551	30.0118	2.47633e-07
ENSG00000130921	C12orf65	protein_coding	Peptide chain release factor class I/class II	chromosome 12 open reading frame 65	CHROMOSOME 12 OPEN READING FRAME 65; C12ORF65	-0.406839	3.28006	32.3414	9.59306e-08
ENSG00000174206	C12orf66	protein_coding	Protein of unknown function DUF2003	chromosome 12 open reading frame 66		-0.226374	2.85639	5.0982	0.0257944
ENSG00000204954	C12orf73	protein_coding	Protein of unknown function DUF4516	chromosome 12 open reading frame 73		-0.962139	2.66773	142.246	5.56222e-22
ENSG00000174456	C12orf76	protein_coding		chromosome 12 open reading frame 76		0.17791	2.70457	4.10882	0.0449204
ENSG00000133935	C14orf1	protein_coding	Erg28	chromosome 14 open reading frame 1	CHROMOSOME 14 OPEN READING FRAME 1; C14ORF1	1.17564	5.24533	184.746	7.12257e-26
ENSG00000179933	C14orf119	protein_coding	Protein of unknown function DUF4508	chromosome 14 open reading frame 119		-0.230901	6.00219	28.2565	5.11745e-07
ENSG00000133943	C14orf159	protein_coding	Protein of unknown function DUF1445	chromosome 14 open reading frame 159		-0.161973	5.30903	8.77473	0.00369637
ENSG00000087302	C14orf166	protein_coding	Protein of unknown function UPF0568	chromosome 14 open reading frame 166	CHROMOSOME 14 OPEN READING FRAME 166; C14ORF166;;CGI99;;CLE	-0.576675	6.53892	129.565	1.07742e-20
ENSG00000170468	C14orf169	protein_coding	JmjC domain	chromosome 14 open reading frame 169	MYC-ASSOCIATED PROTEIN WITH JMJC DOMAIN;;MAPJD;;NUCLEOLAR PROTEIN, 66-KD; NO66;;CHROMOSOME 14 OPEN READING FRAME 169; C14ORF169	-0.64141	-1.00906	8.85424	0.00366935
ENSG00000156411	C14orf2	protein_coding	Mitochondrial proteolipid	chromosome 14 open reading frame 2	CHROMOSOME 14 OPEN READING FRAME 2; C14ORF2;;MP68, RAT, HOMOLOG OF; MP68	-0.380697	5.80338	34.8839	3.47211e-08
ENSG00000179476	C14orf28	protein_coding		chromosome 14 open reading frame 28		0.4322	1.58974	10.4942	0.00155693
ENSG00000140104	C14orf79	protein_coding	Aftiphilin, clathrin-binding box	chromosome 14 open reading frame 79		-0.845866	1.35244	38.5032	8.43648e-09
ENSG00000185347	C14orf80	protein_coding	Domain of unknown function DUF4509	chromosome 14 open reading frame 80		-0.0205501	3.55916	0.0430654	0.835961
ENSG00000100802	C14orf93	protein_coding	Protein of unknown function DUF4616	chromosome 14 open reading frame 93		-0.0627016	3.67218	0.675664	0.412747
ENSG00000167173	C15orf39	protein_coding		chromosome 15 open reading frame 39		0.0748529	7.03124	0.87024	0.352799
ENSG00000169609	C15orf40	protein_coding	Protein of unknown function DUF167	chromosome 15 open reading frame 40		0.218839	2.68617	6.71911	0.010747
ENSG00000186073	C15orf41	protein_coding	Protein of unknown function with TPD sequence-motif	chromosome 15 open reading frame 41	CHROMOSOME 15 OPEN READING FRAME 41; C15ORF41	-1.00357	3.24084	142.604	5.1269e-22
ENSG00000188549	C15orf52	protein_coding	Protein of unknown function DUF4594	chromosome 15 open reading frame 52		1.66656	0.393539	30.5877	1.95579e-07
ENSG00000128891	C15orf57	protein_coding	Coiled-coil domain containing protein 32	chromosome 15 open reading frame 57		0.0611511	3.99603	0.987855	0.322307
ENSG00000189227	C15orf61	protein_coding	Protein of unknown function DUF4528	chromosome 15 open reading frame 61		-0.914151	3.4263	102.84	9.54407e-18
ENSG00000188277	C15orf62	protein_coding		chromosome 15 open reading frame 62		1.114	1.13272	31.7748	1.20631e-07
ENSG00000261652	C15orf65	protein_coding	Uncharacterised protein family UPF0691	chromosome 15 open reading frame 65		0.652578	-0.824164	5.34845	0.0224787
ENSG00000166455	C16orf46	protein_coding	Protein of unknown function DUF4529	chromosome 16 open reading frame 46		-0.62613	0.0205812	9.81215	0.00218802
ENSG00000185716	C16orf52	protein_coding		uncharacterized protein C16orf52 homolog B		0.738696	2.88587	47.2814	3.14802e-10
ENSG00000185905	C16orf54	protein_coding	Protein of unknown function DUF4689	transmembrane protein C16orf54		0.565255	5.99712	53.8768	3.00253e-11
ENSG00000140688	C16orf58	protein_coding	Root UVB sensitive family	chromosome 16 open reading frame 58		-0.199462	6.52525	7.74321	0.00628251
ENSG00000162062	C16orf59	protein_coding	Protein of unknown function DUF4693	chromosome 16 open reading frame 59		-0.743643	3.04294	49.5646	1.38018e-10
ENSG00000103544	C16orf62	protein_coding	UPF0505 family	chromosome 16 open reading frame 62		0.325153	5.80669	58.5712	5.97023e-12
ENSG00000125149	C16orf70	protein_coding	Uncharacterised protein family UPF0183	chromosome 16 open reading frame 70		0.505326	5.47618	113.775	5.39594e-19
ENSG00000182831	C16orf72	protein_coding	Protein of unknown function DUF4588	chromosome 16 open reading frame 72		0.337762	5.9117	37.6116	1.19143e-08
ENSG00000154102	C16orf74	protein_coding	Protein of unknown function DUF4597	chromosome 16 open reading frame 74		-1.47941	0.880646	89.284	4.14161e-16
ENSG00000159761	C16orf86	protein_coding	Protein of unknown function DUF4691	chromosome 16 open reading frame 86		1.22711	0.151741	24.348	2.67368e-06
ENSG00000155330	C16orf87	protein_coding	Uncharacterised domain UPF0547	chromosome 16 open reading frame 87		-0.0788997	4.24722	1.0923	0.298104
ENSG00000174109	C16orf91	protein_coding	Cattle cerebrum and skeletal muscle-specific protein 1	chromosome 16 open reading frame 91		-0.853004	3.3663	85.3189	1.30889e-15
ENSG00000205832	C16orf96	protein_coding	Protein of unknown function DUF4795	chromosome 16 open reading frame 96		1.27947	-0.999806	5.01491	0.0270092
ENSG00000256806	C17orf100	lincRNA				0.891416	-0.775899	6.13765	0.0146535
ENSG00000212719	C17orf51	protein_coding		chromosome 17 open reading frame 51		-0.718799	0.763476	15.7926	0.000122308
ENSG00000125319	C17orf53	protein_coding	Protein of unknown function DUF4539	chromosome 17 open reading frame 53		-0.0221607	3.68913	0.0654472	0.798532
ENSG00000186665	C17orf58	protein_coding	Netrin domain	chromosome 17 open reading frame 58		0.0793878	3.75099	1.38945	0.240876
ENSG00000178927	C17orf62	protein_coding	Protein of unknown function DUF4564	chromosome 17 open reading frame 62		0.704606	6.39394	103.583	7.81632e-18
ENSG00000214226	C17orf67	protein_coding	Protein of unknown function DUF4543	chromosome 17 open reading frame 67		0.919171	0.789904	16.6779	8.11429e-05
ENSG00000108666	C17orf75	protein_coding	Protein Njmu-R1	chromosome 17 open reading frame 75		0.0324485	3.63427	0.174675	0.676752
ENSG00000141219	C17orf80	protein_coding		chromosome 17 open reading frame 80		-0.409177	4.99893	59.2946	4.67345e-12
ENSG00000273604	C17orf96	protein_coding	Protein of unknown function DUF4584	chromosome 17 open reading frame 96		-1.1732	5.03165	221.975	7.4499e-29
ENSG00000141428	C18orf21	protein_coding	Protein of unknown function DUF4674	chromosome 18 open reading frame 21		-0.465331	4.02694	69.9253	1.43538e-13
ENSG00000152242	C18orf25	protein_coding	E3 ubiquitin-protein ligase Arkadia, N-terminal	chromosome 18 open reading frame 25		0.479649	6.11353	96.7678	5.01331e-17
ENSG00000177576	C18orf32	protein_coding	Uncharacterised protein family UPF0729	chromosome 18 open reading frame 32		1.43696	1.077	59.5733	4.25388e-12
ENSG00000166845	C18orf54	protein_coding		chromosome 18 open reading frame 54	CHROMOSOME 18 OPEN READING FRAME 54; C18ORF54;;LAS2, MOUSE, HOMOLOG OF; LAS2	0.827783	4.10649	88.2239	5.62089e-16
ENSG00000141452	C18orf8	protein_coding	Colon cancer-associated Mic1-like	chromosome 18 open reading frame 8		0.381335	5.30599	84.8427	1.50518e-15
ENSG00000131943	C19orf12	protein_coding	Protein C19orf12 homologue	chromosome 19 open reading frame 12	CHROMOSOME 19 OPEN READING FRAME 12; C19ORF12	-0.33657	3.78316	20.9715	1.16616e-05
ENSG00000228300	C19orf24	protein_coding	Protein of unknown function DUF1180	chromosome 19 open reading frame 24		-1.02524	5.36331	106.051	4.04557e-18
ENSG00000119559	C19orf25	protein_coding	Uncharacterised protein family UPF0449	chromosome 19 open reading frame 25		-0.281254	4.69549	12.7309	0.000521463
ENSG00000188305	C19orf35	protein_coding		chromosome 19 open reading frame 35		3.28462	2.86854	138.147	1.42652e-21
ENSG00000214212	C19orf38	protein_coding	Immunoglobulin-like domain	chromosome 19 open reading frame 38		1.7851	6.71759	340.778	1.51827e-36
ENSG00000123144	C19orf43	protein_coding		chromosome 19 open reading frame 43		-0.11709	7.3148	3.11417	0.080209
ENSG00000105072	C19orf44	protein_coding	Domain of unknown function DUF4614	chromosome 19 open reading frame 44		-0.539059	2.0612	28.3035	5.01833e-07
ENSG00000160392	C19orf47	protein_coding	Sterile alpha motif/pointed domain	chromosome 19 open reading frame 47		-0.336148	4.10077	17.3504	5.95605e-05
ENSG00000167747	C19orf48	protein_coding		chromosome 19 open reading frame 48		-0.770594	7.24144	53.6196	3.49004e-11
ENSG00000104979	C19orf53	protein_coding	Uncharacterised protein family UPF0390	chromosome 19 open reading frame 53		-0.417227	5.40866	29.6775	2.8413e-07
ENSG00000188493	C19orf54	protein_coding		chromosome 19 open reading frame 54		0.215435	3.85455	5.34166	0.0225624
ENSG00000132016	C19orf57	protein_coding	Protein of unknown function DUF4671	chromosome 19 open reading frame 57		0.0673625	2.11557	0.17602	0.675581
ENSG00000006015	C19orf60	protein_coding		chromosome 19 open reading frame 60		0.205239	4.51683	3.86803	0.0515686
ENSG00000130813	C19orf66	protein_coding	Repressor of yield of DENV protein	chromosome 19 open reading frame 66	CHROMOSOME 19 OPEN READING FRAME 66; C19ORF66;;REPRESSOR FOR YIELD OF DENGUE VIRUS; RYDEN	1.14993	3.83919	106.677	3.42679e-18
ENSG00000185453	C19orf68	protein_coding	E3 ubiquitin-protein ligase SIN-like	chromosome 19 open reading frame 68		0.141323	3.89347	1.80245	0.182001
ENSG00000174917	C19orf70	protein_coding	MICOS complex subunit Mic13	chromosome 19 open reading frame 70	CHROMOSOME 19 OPEN READING FRAME 70; C19ORF70;;MITOCHONDRIAL CONTACT SITE AND CRISTAE ORGANIZING SYSTEM, 13-KD SUBUNIT;MIC13;;MICOS COMPLEX, 13-KD SUBUNIT;;QIL1	-0.890276	4.2072	79.8038	6.7437e-15
ENSG00000197223	C1D	protein_coding	Sas10/Utp3/C1D	C1D nuclear receptor corepressor	NUCLEAR DNA-BINDING PROTEIN C1D;;C1D;;SMALL UNIQUE NUCLEAR RECEPTOR COREPRESSOR; SUNCOR	-0.246995	4.49535	5.62828	0.0192949
ENSG00000106392	C1GALT1	protein_coding	C1GALT1	core 1 synthase, glycoprotein-N-acetylgalactosamine 3-beta-galactosyltransferase 1	CORE 1 SYNTHASE, GLYCOPROTEIN-N-ACETYLGALACTOSAMINE 3-BETA-GALACTOSYLTRANSFERASE,1; C1GALT1;;CORE 1 BETA-3-GAL-T;;T SYNTHASE	-0.113066	5.38648	1.98568	0.161431
ENSG00000171155	C1GALT1C1	protein_coding	C1GALT1-specific chaperone 1	C1GALT1 specific chaperone 1	C1GALT1-SPECIFIC CHAPERONE 1; C1GALT1C1;;CORE 1 BETA-3-GALACTOSYLTRANSFERASE-SPECIFIC MOLECULAR CHAPERONE;;COSMC;;C1GALT2	0.703129	4.01403	85.655	1.18617e-15
ENSG00000179397	C1orf101	protein_coding	Cation channel sperm-associated protein subunit delta	chromosome 1 open reading frame 101		1.85586	-1.22345	12.9766	0.000463312
ENSG00000163362	C1orf106	protein_coding	Protein of unknown function DUF3338	chromosome 1 open reading frame 106		-0.76036	2.59852	55.7475	1.56878e-11
ENSG00000116922	C1orf109	protein_coding	Casein Kinase 2 substrate	chromosome 1 open reading frame 109	CHROMOSOME 1 OPEN READING FRAME 109; C1ORF109	-1.11264	4.3117	439.862	1.47694e-41
ENSG00000000460	C1orf112	protein_coding		chromosome 1 open reading frame 112		-0.490182	4.7965	54.194	2.6882e-11
ENSG00000197982	C1orf122	protein_coding	Protein of unknown function DUF4726	chromosome 1 open reading frame 122		0.178962	4.13494	3.50865	0.0635306
ENSG00000162384	C1orf123	protein_coding	Protein of unknown function DUF866, eukaryotic	chromosome 1 open reading frame 123		-0.0733149	4.71736	2.63209	0.107401
ENSG00000175262	C1orf127	protein_coding	Protein of unknown function DUF4556	chromosome 1 open reading frame 127		2.24616	0.933793	59.9765	3.71368e-12
ENSG00000143633	C1orf131	protein_coding	Protein of unknown function DUF4602	chromosome 1 open reading frame 131		-0.483733	4.34512	68.824	2.03931e-13
ENSG00000203709	C1orf132	lincRNA				0.574471	0.438264	5.77104	0.0178565
ENSG00000131591	C1orf159	protein_coding	Protein of unknown function DUF4501	chromosome 1 open reading frame 159		-0.654861	3.90607	39.5177	5.71124e-09
ENSG00000143110	C1orf162	protein_coding		chromosome 1 open reading frame 162		1.40928	5.7983	612.885	1.7811e-48
ENSG00000198912	C1orf174	protein_coding	UPF0688 family	chromosome 1 open reading frame 174		-0.68884	4.28012	115.071	3.8742e-19
ENSG00000263961	C1orf186	protein_coding	Protein of unknown function DUF4692	chromosome 1 open reading frame 186	CHROMOSOME 1 OPEN READING FRAME 186; C1ORF186;;REGULATOR OF HUMAN ERYTHROID CELL EXPANSION; RHEX	-2.5799	5.44113	373.956	4.95592e-38
ENSG00000119280	C1orf198	protein_coding	Domain of unknown function DUF4706	chromosome 1 open reading frame 198		-0.470553	4.88125	52.491	4.8802e-11
ENSG00000116667	C1orf21	protein_coding	Protein of unknown function DUF4612	chromosome 1 open reading frame 21		-0.520809	2.02788	13.2441	0.000407482
ENSG00000142686	C1orf216	protein_coding	Protein of unknown function DUF4653	chromosome 1 open reading frame 216		-0.590229	4.8672	75.643	2.39734e-14
ENSG00000239887	C1orf226	protein_coding	Protein of unknown function DUF4628	chromosome 1 open reading frame 226		0.265436	-1.15162	0.308369	0.579737
ENSG00000198520	C1orf228	protein_coding		chromosome 1 open reading frame 228		0.406481	6.5665	13.0683	0.000446207
ENSG00000157181	C1orf27	protein_coding	ODR-4-like	chromosome 1 open reading frame 27	CHROMOSOME 1 OPEN READING FRAME 27; C1ORF27;;ODORANT RESPONSE ABNORMAL 4, C. ELEGANS, HOMOLOG OF; ODR4	-0.060254	3.70656	0.539003	0.464307
ENSG00000143793	C1orf35	protein_coding	Kinase phosphorylation domain	chromosome 1 open reading frame 35		-0.170612	4.73841	5.12571	0.025406
ENSG00000143612	C1orf43	protein_coding	NICE-3 predicted	chromosome 1 open reading frame 43		-0.371659	8.73735	104.356	6.35452e-18
ENSG00000164008	C1orf50	protein_coding	Protein of unknown function DUF2452	chromosome 1 open reading frame 50		0.353197	-0.336002	2.01027	0.158881
ENSG00000162642	C1orf52	protein_coding	Protein of unknown function DUF4660	chromosome 1 open reading frame 52		-0.297405	4.47582	31.0831	1.59775e-07
ENSG00000203724	C1orf53	protein_coding		chromosome 1 open reading frame 53		0.326828	0.878452	3.2703	0.073099
ENSG00000118292	C1orf54	protein_coding	Protein of unknown function DUF4634	chromosome 1 open reading frame 54		0.58669	0.749274	11.1627	0.00111896
ENSG00000162757	C1orf74	protein_coding	Protein of unknown function DUF4504	chromosome 1 open reading frame 74		0.260634	3.59569	16.6161	8.34904e-05
ENSG00000108561	C1QBP	protein_coding	Mitochondrial glycoprotein	complement C1q binding protein	COMPLEMENT COMPONENT C1q-BINDING PROTEIN; C1QBP;;C1q GLOBULAR DOMAIN-BINDING PROTEIN;;GLOBULAR DOMAIN OF C1q, RECEPTOR FOR; GC1qR;;HYALURONIC ACID-BINDING PROTEIN 1; HABP1;;P32 SPLICING FACTOR SF2-ASSOCIATED PROTEIN	-1.60942	7.1099	497.486	4.47876e-44
ENSG00000131094	C1QL1	protein_coding	C1q domain	complement C1q like 1	COMPLEMENT COMPONENT 1, q SUBCOMPONENT-LIKE 1; C1QL1;;C1q-RELATED FACTOR; CRF;;C1QRF	2.93416	-0.0230322	28.9511	3.83513e-07
ENSG00000186897	C1QL4	protein_coding	C1q domain	complement C1q like 4	COMPLEMENT COMPONENT 1, q SUBCOMPONENT-LIKE 4; C1QL4;;C1q/TNF-RELATED PROTEIN 11; CTRP11	-0.638922	-1.35425	1.2919	0.258009
ENSG00000082196	C1QTNF3	protein_coding	C1q domain	C1q and tumor necrosis factor related protein 3	C1q- AND TUMOR NECROSIS FACTOR-RELATED PROTEIN 3; C1QTNF3;;CTRP3;;COLLAGENOUS REPEAT-CONTAINING SEQUENCE, 26-KD PROTEIN; CORS26	1.44556	0.040316	28.8488	4.00123e-07
ENSG00000133466	C1QTNF6	protein_coding	C1q domain	C1q and tumor necrosis factor related protein 6	C1q- AND TUMOR NECROSIS FACTOR-RELATED PROTEIN 6; C1QTNF6;;CTRP6	3.25839	0.700796	99.2939	2.50004e-17
ENSG00000159403	C1R	protein_coding	EGF-type aspartate/asparagine hydroxylation site	complement C1r	COMPLEMENT COMPONENT 1, r SUBCOMPONENT; C1R;;COMPLEMENT COMPONENT C1r	4.42954	-0.212122	68.912	2.29193e-13
ENSG00000139178	C1RL	protein_coding	Sushi/SCR/CCP domain	complement C1r subcomponent like	COMPLEMENT COMPONENT C1r-LIKE PROTEIN; C1RL;;C1r-LIKE SERINE PROTEASE ANALOG; CLSPA;;C1r-LIKE PROTEIN; C1RLP	3.21518	5.07417	602.65	4.09015e-48
ENSG00000205885	C1RL-AS1	antisense				4.09164	1.07324	188.526	3.41674e-26
ENSG00000088854	C20orf194	protein_coding		chromosome 20 open reading frame 194	CHROMOSOME 20 OPEN READING FRAME 194; C20ORF194	0.904844	4.62093	199.523	4.24179e-27
ENSG00000171984	C20orf196	protein_coding	Protein of unknown function DUF4521	chromosome 20 open reading frame 196		-0.0291932	1.68204	0.070548	0.791005
ENSG00000176659	C20orf197	lincRNA				-0.162336	3.01748	2.84069	0.0945552
ENSG00000101084	C20orf24	protein_coding	Rab5-interacting protein	chromosome 20 open reading frame 24		-0.104235	3.84442	1.09412	0.297703
ENSG00000101220	C20orf27	protein_coding	Uncharacterised protein family UPF0687	chromosome 20 open reading frame 27		-1.60048	5.4678	241.374	2.79923e-30
ENSG00000196476	C20orf96	protein_coding	Protein of unknown function DUF4618	chromosome 20 open reading frame 96		-0.421526	2.25834	14.4779	0.000226584
ENSG00000160226	C21orf2	protein_coding	Leucine-rich repeat	chromosome 21 open reading frame 2	CHROMOSOME 21 OPEN READING FRAME 2; C21ORF2	-0.00847809	3.52738	0.00598699	0.938456
ENSG00000160298	C21orf58	protein_coding	Domain of unknown function DUF4587	chromosome 21 open reading frame 58		1.23543	3.50859	103.467	8.06377e-18
ENSG00000159079	C21orf59	protein_coding	Protein of unknown function DUF2870	chromosome 21 open reading frame 59	CHROMOSOME 21 OPEN READING FRAME 59; C21ORF59	-0.763646	2.78812	69.7664	1.50977e-13
ENSG00000205930	C21orf62-AS1	antisense				1.67788	-1.05041	8.79022	0.00366731
ENSG00000154642	C21orf91	protein_coding	EURL protein	chromosome 21 open reading frame 91		0.196305	5.45775	5.20149	0.0243674
ENSG00000215012	C22orf29	protein_coding	Protein Bop	chromosome 22 open reading frame 29		-0.278398	5.68686	24.0617	3.02425e-06
ENSG00000188511	C22orf34	lincRNA				-0.576878	3.20675	28.5188	4.5884e-07
ENSG00000242259	C22orf39	protein_coding	Protein of unknown function DUF3128	chromosome 22 open reading frame 39		0.120794	4.0009	4.91567	0.0285357
ENSG00000184208	C22orf46	protein_coding	Protein of unknown function DUF4727	chromosome 22 open reading frame 46		1.19201	4.47569	179.072	2.18387e-25
ENSG00000157617	C2CD2	protein_coding		C2 calcium dependent domain containing 2		-0.300648	3.5953	19.7338	2.02348e-05
ENSG00000172375	C2CD2L	protein_coding	C2 domain	C2CD2 like		0.252205	4.79704	9.04811	0.00321663
ENSG00000168014	C2CD3	protein_coding	C2 domain	C2 calcium dependent domain containing 3	C2 CALCIUM-DEPENDENT DOMAIN-CONTAINING PROTEIN 3; C2CD3	0.176294	5.17292	11.7701	0.000830967
ENSG00000111731	C2CD5	protein_coding	C2 domain	C2 calcium dependent domain containing 5		1.29684	5.71477	314.683	4.82077e-35
ENSG00000197927	C2orf27A	transcribed_unprocessed_pseudogene				-0.627142	1.24912	17.3229	6.03156e-05
ENSG00000115998	C2orf42	protein_coding	Uncharacterised protein C2orf42	chromosome 2 open reading frame 42		0.381144	3.53098	27.6437	6.6089e-07
ENSG00000163009	C2orf48	lincRNA				0.409867	-0.873269	1.41457	0.236694
ENSG00000135974	C2orf49	protein_coding	Ashwin	chromosome 2 open reading frame 49		0.235966	5.1301	13.0594	0.000445244
ENSG00000168887	C2orf68	protein_coding	Uncharacterised protein family UPF0561	chromosome 2 open reading frame 68		0.420127	4.72122	56.129	1.3755e-11
ENSG00000178074	C2orf69	protein_coding	Uncharacterised protein family UPF0565	chromosome 2 open reading frame 69		0.0277236	4.36182	0.142177	0.706805
ENSG00000186132	C2orf76	protein_coding	Uncharacterised protein family UPF0538	chromosome 2 open reading frame 76		0.747397	1.86279	29.3899	3.19899e-07
ENSG00000159239	C2orf81	protein_coding	Protein of unknown function DUF4639	chromosome 2 open reading frame 81		0.287089	-0.232169	1.18081	0.279471
ENSG00000182600	C2orf82	protein_coding		chromosome 2 open reading frame 82		0.298255	-0.499445	1.04064	0.309765
ENSG00000187699	C2orf88	protein_coding	Small membrane A-kinase anchor protein	chromosome 2 open reading frame 88	CHROMOSOME 2 OPEN READING FRAME 88; C2ORF88;;SMALL MEMBRANE PROTEIN KINASE A-ANCHORING PROTEIN; SMAKAP	-0.728729	-1.1416	4.09831	0.0456852
ENSG00000125730	C3	protein_coding	Anaphylatoxin/fibulin	complement C3	COMPLEMENT COMPONENT 3; C3C3a, INCLUDED;;C3b, INCLUDED;;C3c, INCLUDED;;C3d, INCLUDED;;ACYLATION-STIMULATING PROTEIN, INCLUDED; ASP, INCLUDED	1.66963	1.28815	28.0532	5.56979e-07
ENSG00000171860	C3AR1	protein_coding	G protein-coupled receptor, rhodopsin-like	complement C3a receptor 1	COMPLEMENT COMPONENT 3a RECEPTOR 1; C3AR1;;C3AR	0.351032	5.67935	12.0248	0.000734012
ENSG00000174928	C3orf33	protein_coding		chromosome 3 open reading frame 33		-1.19498	1.71665	84.866	1.49492e-15
ENSG00000179021	C3orf38	protein_coding	Uncharacterised protein C3orf38 (DUF4518)	chromosome 3 open reading frame 38		0.144787	5.03345	5.62145	0.0193668
ENSG00000181744	C3orf58	protein_coding	Uncharacterised protein family UPF0672	chromosome 3 open reading frame 58	CHROMOSOME 3 OPEN READING FRAME 58; C3ORF58;;DELETED IN AUTISM 1; DIA1	0.357662	5.35547	42.4254	1.89513e-09
ENSG00000188315	C3orf62	protein_coding	Protein of unknown function DUF4712	chromosome 3 open reading frame 62		1.11217	4.72419	265.382	6.1226e-32
ENSG00000187068	C3orf70	protein_coding	UPF0524 family	chromosome 3 open reading frame 70		0.706572	1.0017	16.5327	8.67685e-05
ENSG00000154274	C4orf19	protein_coding	Protein of unknown function DUF4699	chromosome 4 open reading frame 19		-0.920509	1.16837	7.51185	0.00708586
ENSG00000164096	C4orf3	protein_coding		chromosome 4 open reading frame 3		0.653762	5.78326	69.0856	1.87573e-13
ENSG00000174749	C4orf32	protein_coding	Domain of unknown function DUF4605	chromosome 4 open reading frame 32		-0.613755	3.80393	47.6223	2.78126e-10
ENSG00000151470	C4orf33	protein_coding	UPF0462 protein C4orf33	chromosome 4 open reading frame 33		0.884158	2.46022	67.1895	3.44805e-13
ENSG00000163633	C4orf36	protein_coding	Protein of unknown function DUF4522	uncharacterized LOC100506746		-0.537814	-0.160631	5.73385	0.0182201
ENSG00000205208	C4orf46	protein_coding	Renal cancer differentiation gene 1 protein	chromosome 4 open reading frame 46	CHROMOSOME 4 OPEN READING FRAME 46; C4ORF46;;RENAL CANCER DIFFERENTIATION GENE 1; RCDG1	-0.768035	5.00633	115.825	3.19851e-19
ENSG00000243449	C4orf48	protein_coding	Neuropeptide-like protein	chromosome 4 open reading frame 48	CHROMOSOME 4 OPEN READING FRAME 48; C4ORF48	-0.415693	4.94436	13.8018	0.000312212
ENSG00000106804	C5	protein_coding	Anaphylatoxin/fibulin	complement C5	COMPLEMENT COMPONENT 5; C5	1.13959	2.13518	74.2188	3.72469e-14
ENSG00000197405	C5AR1	protein_coding		complement C5a receptor 1	COMPLEMENT COMPONENT 5a RECEPTOR 1; C5AR1;;COMPLEMENT COMPONENT 5 RECEPTOR 1; C5R1;;C5a ANAPHYLATOXIN RECEPTOR; C5AR;;CD88 ANTIGEN; CD88	3.0714	6.62459	258.168	8.46352e-31
ENSG00000134830	C5AR2	protein_coding	G protein-coupled receptor, rhodopsin-like	complement component 5a receptor 2	COMPLEMENT COMPONENT 5a RECEPTOR 2; C5AR2;;G PROTEIN-COUPLED RECEPTOR 77; GPR77;;C5L2	1.70472	3.24493	124.926	3.31152e-20
ENSG00000113583	C5orf15	protein_coding		chromosome 5 open reading frame 15		0.265249	5.24372	18.9397	2.89149e-05
ENSG00000082213	C5orf22	protein_coding	Uncharacterised protein family UPF0489	chromosome 5 open reading frame 22		0.11139	5.14079	2.61339	0.108643
ENSG00000181904	C5orf24	protein_coding		chromosome 5 open reading frame 24		0.481627	4.92239	30.736	1.84077e-07
ENSG00000181751	C5orf30	protein_coding	UNC119-binding protein	chromosome 5 open reading frame 30	CHROMOSOME 5 OPEN READING FRAME 30; C5ORF30	-0.52922	3.47718	45.9595	5.10271e-10
ENSG00000172244	C5orf34	protein_coding	Domain of unknown function DUF4524	chromosome 5 open reading frame 34		0.317908	2.80609	8.33347	0.0046324
ENSG00000197603	C5orf42	protein_coding	WD40-repeat-containing domain	chromosome 5 open reading frame 42	CHROMOSOME 5 OPEN READING FRAME 42; C5ORF42	0.859101	2.39647	47.0404	3.43674e-10
ENSG00000205765	C5orf51	protein_coding		chromosome 5 open reading frame 51		0.0365479	5.90981	0.225449	0.635799
ENSG00000197536	C5orf56	protein_coding				0.911335	-0.68776	6.82701	0.0101506
ENSG00000164241	C5orf63	protein_coding		chromosome 5 open reading frame 63		0.724434	1.01441	19.2878	2.47194e-05
ENSG00000224186	C5orf66	antisense				-1.35441	-0.567411	28.8679	3.96971e-07
ENSG00000186577	C6orf1	protein_coding		chromosome 6 open reading frame 1	CHROMOSOME 6 OPEN READING FRAME 1; C6ORF1;;LBH	1.32793	3.8145	170.145	1.33028e-24
ENSG00000196821	C6orf106	protein_coding	UBA-like	chromosome 6 open reading frame 106	CHROMOSOME 6 OPEN READING FRAME 106; C6ORF106	0.28533	7.46103	71.2483	9.43979e-14
ENSG00000185127	C6orf120	protein_coding	UPF0669 protein C6orf120	chromosome 6 open reading frame 120	CHROMOSOME 6 OPEN READING FRAME 120; C6ORF120	0.20936	5.54037	20.5929	1.37939e-05
ENSG00000204564	C6orf136	protein_coding		chromosome 6 open reading frame 136		-0.173914	3.74545	4.94771	0.0280332
ENSG00000130349	C6orf203	protein_coding		chromosome 6 open reading frame 203		-0.138974	3.01998	2.75906	0.0993678
ENSG00000181577	C6orf223	protein_coding		chromosome 6 open reading frame 223		3.07617	4.89375	495.437	7.05612e-44
ENSG00000204439	C6orf47	protein_coding	Protein of unknown function DUF4661	chromosome 6 open reading frame 47		0.91344	4.95771	236.161	6.64078e-30
ENSG00000204387	C6orf48	protein_coding		chromosome 6 open reading frame 48	CHROMOSOME 6 OPEN READING FRAME 48; C6ORF48;;G8 PROTEIN; G8	0.366691	7.44731	21.4536	9.42447e-06
ENSG00000112308	C6orf62	protein_coding	Protein of unknown function DUF4566	chromosome 6 open reading frame 62		0.45047	8.16133	92.344	1.73049e-16
ENSG00000198663	C6orf89	protein_coding		chromosome 6 open reading frame 89	C6ORF89 GENE; C6ORF89;;BOMBESIN RECEPTOR-ACTIVATED PROTEIN; BRAP;;AMFION	0.782266	6.9338	667.275	2.58948e-50
ENSG00000146576	C7orf26	protein_coding	Protein of unknown function DUF4507	chromosome 7 open reading frame 26		-0.310051	5.24995	29.2652	3.36801e-07
ENSG00000153790	C7orf31	protein_coding	Protein of unknown function DUF4555	chromosome 7 open reading frame 31	CHROMOSOME 7 OPEN READING FRAME 31; C7ORF31	-0.365572	3.01239	19.9107	1.86953e-05
ENSG00000146826	C7orf43	protein_coding		microRNA 4658		0.8785	5.16952	121.861	7.03791e-20
ENSG00000122783	C7orf49	protein_coding	Modulator of retrovirus infection	chromosome 7 open reading frame 49	CHROMOSOME 7 OPEN READING FRAME 49; C7ORF49;;MODULATOR OF RETROVIRUS INFECTION; MRI	-0.156877	6.46827	16.8784	7.39821e-05
ENSG00000146540	C7orf50	protein_coding	Protein of unknown function DUF2373	chromosome 7 open reading frame 50		-0.677949	5.22576	77.2211	1.47703e-14
ENSG00000185955	C7orf61	protein_coding	Protein of unknown function DUF4703	chromosome 7 open reading frame 61		0.913991	-0.674676	7.92756	0.00571021
ENSG00000243317	C7orf73	protein_coding	Protein of unknown function DUF4535	chromosome 7 open reading frame 73		0.0412619	6.43561	0.425977	0.515243
ENSG00000176919	C8G	protein_coding	Lipocalin/cytosolic fatty-acid binding domain	complement C8 gamma chain	COMPLEMENT COMPONENT 8, GAMMA SUBUNIT; C8G;;C8C	1.01078	-1.44258	4.03121	0.0469571
ENSG00000182307	C8orf33	protein_coding	Protein of unknown function DUF4615	chromosome 8 open reading frame 33		-1.4639	5.6272	378.199	1.48299e-38
ENSG00000156172	C8orf37	protein_coding	C8orf37 protein	chromosome 8 open reading frame 37	CHROMOSOME 8 OPEN READING FRAME 37; C8ORF37	0.12667	1.50965	1.06755	0.303619
ENSG00000213865	C8orf44	protein_coding		chromosome 8 open reading frame 44		1.53529	1.05678	50.999	8.27154e-11
ENSG00000241852	C8orf58	protein_coding	Domain of unknown function DUF4657	chromosome 8 open reading frame 58		1.67746	0.936365	54.639	2.30266e-11
ENSG00000176731	C8orf59	protein_coding	Protein of unknown function DUF4665	chromosome 8 open reading frame 59		-0.520419	4.57157	37.5754	1.20831e-08
ENSG00000189376	C8orf76	protein_coding	Tetratricopeptide-like helical domain	chromosome 8 open reading frame 76		-0.0403133	0.997649	0.0609737	0.805394
ENSG00000213563	C8orf82	protein_coding	Protein of unknown function DUF4505	chromosome 8 open reading frame 82		0.161713	4.43192	2.22684	0.138307
ENSG00000253250	C8orf88	protein_coding		chromosome 8 open reading frame 88		2.86223	-1.34273	10.0759	0.0020153
ENSG00000180539	C9orf139	antisense				2.02821	2.49171	88.9404	4.57179e-16
ENSG00000148362	C9orf142	protein_coding	Protein PAXX	chromosome 9 open reading frame 142	CHROMOSOME 9 OPEN READING FRAME 142; C9ORF142;;PARALOG OF XRCC4 AND XLF; PAXX	-0.426084	5.00389	25.855	1.40451e-06
ENSG00000171159	C9orf16	protein_coding	Uncharacterised protein family UPF0184, eukaryota	chromosome 9 open reading frame 16		1.11769	5.14269	120.067	1.09923e-19
ENSG00000232434	C9orf172	protein_coding		chromosome 9 open reading frame 172		1.39198	2.16558	76.927	1.61606e-14
ENSG00000148120	C9orf3	protein_coding	Peptidase M1, alanine aminopeptidase/leukotriene A4 hydrolase	microRNA 24-1	MICRO RNA 24-1; MIR24-1;;miRNA24-1;;MIRN24-1MICRO RNA 189, INCLUDED; miRNA189, INCLUDED; MIR189, INCLUDED	-0.157729	2.21012	3.06903	0.0824025
ENSG00000135045	C9orf40	protein_coding	Uncharacterised protein family C9orf40	chromosome 9 open reading frame 40		0.121757	4.74371	4.29514	0.0404058
ENSG00000183784	C9orf66	protein_coding		chromosome 9 open reading frame 66		0.790669	-0.519281	7.46961	0.00724369
ENSG00000238227	C9orf69	protein_coding	Septin	chromosome 9 open reading frame 69		-0.195251	5.81891	6.09303	0.0150089
ENSG00000147894	C9orf72	protein_coding	C9orf72-like protein family	chromosome 9 open reading frame 72	CHROMOSOME 9 OPEN READING FRAME 72; C9ORF72	0.579602	2.1985	22.053	7.24123e-06
ENSG00000136819	C9orf78	protein_coding	Hepatocellular carcinoma-associated antigen 59	chromosome 9 open reading frame 78		-0.307422	6.50728	41.3017	2.89505e-09
ENSG00000155621	C9orf85	protein_coding		chromosome 9 open reading frame 85		0.0592869	3.17701	0.548474	0.460417
ENSG00000063180	CA11	protein_coding	Alpha carbonic anhydrase	carbonic anhydrase 11	CARBONIC ANHYDRASE XI; CA11;;CARBONIC ANHYDRASE-RELATED PROTEIN 11;;CARP XI;;CARBONIC ANHYDRASE-RELATED PROTEIN 2; CARP2	-0.305407	1.00867	4.00734	0.0476031
ENSG00000185015	CA13	protein_coding	Alpha carbonic anhydrase	carbonic anhydrase 13	CARBONIC ANHYDRASE XIII; CA13	0.107966	0.384273	0.377634	0.540059
ENSG00000104267	CA2	protein_coding	Alpha carbonic anhydrase	carbonic anhydrase 2	CARBONIC ANHYDRASE II; CA2;;CA II;;CARBONIC ANHYDRASE B;;CARBONIC ANHYDRASE C, FORMERLY	-0.979739	7.48226	161.767	7.64125e-24
ENSG00000169239	CA5B	protein_coding	Carbonic anhydrase VB, mitochondria	carbonic anhydrase 5B	CARBONIC ANHYDRASE VB, MITOCHONDRIAL; CA5B;;CA VB	0.81508	1.62954	46.6748	3.9271e-10
ENSG00000186312	CA5BP1	transcribed_unprocessed_pseudogene				-0.291667	3.39768	14.6202	0.00021186
ENSG00000178538	CA8	protein_coding	Alpha carbonic anhydrase	carbonic anhydrase 8	CARBONIC ANHYDRASE VIII; CA8;;CA VIII;;CARBONIC ANHYDRASE-RELATED POLYPEPTIDE; CARP;;CARBONIC ANHYDRASE-LIKE SEQUENCE; CALS	-0.949782	4.86792	180.464	1.65554e-25
ENSG00000120159	CAAP1	protein_coding		caspase activity and apoptosis inhibitor 1		-0.254391	4.46145	10.6418	0.00144707
ENSG00000135932	CAB39	protein_coding	Armadillo-like helical	calcium binding protein 39	CALCIUM-BINDING PROTEIN 39; CAB39;;MO25-ALPHA	-0.158085	7.78651	8.81698	0.00361765
ENSG00000102547	CAB39L	protein_coding	Armadillo-like helical	calcium binding protein 39 like	CALCIUM-BINDING PROTEIN 39-LIKE PROTEIN; CAB39L;;CAB39-LIKE PROTEIN;;MO25-BETA	0.436535	3.08959	20.8841	1.21223e-05
ENSG00000099991	CABIN1	protein_coding	Tetratricopeptide-like helical domain	calcineurin binding protein 1	CALCINEURIN-BINDING PROTEIN 1;;CABIN1;;CAIN	0.113593	6.92826	2.91666	0.0903065
ENSG00000134508	CABLES1	protein_coding	Cyclin, N-terminal	Cdk5 and Abl enzyme substrate 1	CDK5 AND ABL ENZYME SUBSTRATE 1; CABLES1;;CABLES;;INTERACTOR WITH CDK3 1;;IK3-1	-1.84597	4.9308	758.321	4.03203e-53
ENSG00000149679	CABLES2	protein_coding	Cyclin, N-terminal	Cdk5 and Abl enzyme substrate 2		0.810861	4.4572	157.094	2.07324e-23
ENSG00000160325	CACFD1	protein_coding	TVP18/Calcium channel flower	calcium channel flower domain containing 1	CHROMOSOME 9 OPEN READING FRAME 7; C9ORF7;;FLOWER, DROSOPHILA, HOMOLOG OF; FLOWER	3.23078	3.11044	288.553	1.90994e-33
ENSG00000151067	CACNA1C	protein_coding	Voltage-dependent calcium channel, L-type, alpha-1C subunit	calcium voltage-gated channel subunit alpha1 C		0.715503	1.71201	20.8932	1.20732e-05
ENSG00000198216	CACNA1E	protein_coding	Voltage-dependent calcium channel, alpha-1 subunit	calcium voltage-gated channel subunit alpha1 E	CALCIUM CHANNEL, VOLTAGE-DEPENDENT, ALPHA-1E SUBUNIT; CACNA1E;;CALCIUM CHANNEL, L TYPE, ALPHA-1 POLYPEPTIDE, ISOFORM 6; CACNL1A6CaV2.3;;CALCIUM CHANNEL, R TYPE	-0.636189	1.11153	3.15562	0.0782505
ENSG00000151062	CACNA2D4	protein_coding	von Willebrand factor, type A	calcium voltage-gated channel auxiliary subunit alpha2delta 4	CALCIUM CHANNEL, VOLTAGE-DEPENDENT, ALPHA-2/DELTA SUBUNIT 4; CACNA2D4	1.01072	5.30015	86.8803	8.29717e-16
ENSG00000167535	CACNB3	protein_coding	Voltage-dependent calcium channel, L-type, beta subunit	calcium voltage-gated channel auxiliary subunit beta 3	CALCIUM CHANNEL, VOLTAGE-DEPENDENT, BETA-3 SUBUNIT; CACNB3;;CALCIUM CHANNEL, L TYPE, BETA-3 POLYPEPTIDE; CACNLB3	0.969137	3.66286	75.8951	2.21827e-14
ENSG00000182389	CACNB4	protein_coding	Voltage-dependent calcium channel, L-type, beta subunit	calcium voltage-gated channel auxiliary subunit beta 4		-0.0246805	0.944607	0.0209522	0.885157
ENSG00000105298	CACTIN	protein_coding	Cactin, central domain	cactin, spliceosome C complex subunit		-0.309903	5.45455	12.363	0.000622926
ENSG00000151893	CACUL1	protein_coding	Cullin, N-terminal	CDK2 associated cullin domain 1		0.052875	6.67456	0.951096	0.331441
ENSG00000116161	CACYBP	protein_coding	CS domain	calcyclin binding protein	CALCYCLIN-BINDING PROTEIN; CACYBP;;SIAH1-INTERACTING PROTEIN; SIP	-1.07349	6.6718	214.986	2.54533e-28
ENSG00000177855	CACYBPP2	processed_pseudogene				-1.12627	4.14858	263.271	8.48413e-32
ENSG00000084774	CAD	protein_coding	Aspartate carbamoyltransferase	carbamoyl-phosphate synthetase 2, aspartate transcarbamylase, and dihydroorotase	CARBAMOYL PHOSPHATE SYNTHETASE/ASPARTATE TRANSCARBAMOYLASE/DIHYDROOROTASE;CAD;;CAD TRIFUNCTIONAL PROTEIN;;CPSase/ATCase/DHOase	-1.20512	7.82564	215.165	2.46581e-28
ENSG00000105767	CADM4	protein_coding	Neurexin/syndecan/glycophorin C	cell adhesion molecule 4	IMMUNOGLOBULIN SUPERFAMILY, MEMBER 4C; IGSF4C;;TSLC1-LIKE GENE 2; TSLL2;;NECTIN-LIKE PROTEIN 4; NECL4;;SYNAPTIC CELL ADHESION MOLECULE 4; SYNCAM4	1.89543	1.53163	60.69	2.92258e-12
ENSG00000270419	CAHM	lincRNA				1.98721	-1.06999	15.0506	0.000173026
ENSG00000012822	CALCOCO1	protein_coding	Calcium binding and coiled-coil domain-like	calcium binding and coiled-coil domain 1		1.21753	5.37382	175.053	4.89209e-25
ENSG00000136436	CALCOCO2	protein_coding	Calcium binding and coiled-coil domain-like	calcium binding and coiled-coil domain 2	CALCIUM BINDING AND COILED-COIL DOMAIN PROTEIN 2; CALCOCO2;;NUCLEAR DOMAIN 10 PROTEIN 52; NDP52	0.227166	6.88255	15.4636	0.000142595
ENSG00000138172	CALHM2	protein_coding	FAM26 family	calcium homeostasis modulator 2	CALCIUM HOMEOSTASIS MODULATOR 2; CALHM2;;FAMILY WITH SEQUENCE SIMILARITY 26, MEMBER B; FAM26B	0.966484	3.74767	73.0059	5.43513e-14
ENSG00000198668	CALM1	protein_coding	EF-hand domain	calmodulin 3	CALMODULIN 1; CALM1;;PHOSPHORYLASE KINASE, DELTA SUBUNIT; PHKD	0.435537	8.06651	73.529	4.61623e-14
ENSG00000143933	CALM2	protein_coding	EF-hand domain	calmodulin 2	CALMODULIN 2; CALM2;;PHKD2	-0.207985	8.52592	11.6307	0.000889533
ENSG00000160014	CALM3	protein_coding	EF-hand domain	calmodulin 3	CALMODULIN 3; CALM3;;PHKD3	0.00704148	8.19981	0.0170502	0.896333
ENSG00000129007	CALML4	protein_coding		calmodulin like 4		0.308429	-0.261925	1.60626	0.207521
ENSG00000179218	CALR	protein_coding	Calreticulin/calnexin	calreticulin	CALRETICULIN; CALR;;CRT;;AUTOANTIGEN Ro; RO;;COMPLEMENT COMPONENT C1q RECEPTOR; CC1QR	-0.854958	11.0038	156.143	2.5454e-23
ENSG00000128595	CALU	protein_coding	EF-hand domain	calumenin	CALUMENIN; CALU	-0.12963	7.89593	5.72035	0.0183539
ENSG00000134072	CAMK1	protein_coding	Protein kinase domain	calcium/calmodulin dependent protein kinase I	CALCIUM/CALMODULIN-DEPENDENT PROTEIN KINASE I; CAMK1;;CAMKI	0.562469	5.68289	43.8068	1.1306e-09
ENSG00000183049	CAMK1D	protein_coding	Protein kinase domain	calcium/calmodulin dependent protein kinase ID		1.2931	3.40277	207.819	9.22106e-28
ENSG00000058404	CAMK2B	protein_coding	Protein kinase domain	calcium/calmodulin dependent protein kinase II beta	CALCIUM/CALMODULIN-DEPENDENT PROTEIN KINASE II-BETA; CAMK2B	0.403541	-0.297183	1.6475	0.201822
ENSG00000148660	CAMK2G	protein_coding	Protein kinase domain	calcium/calmodulin dependent protein kinase II gamma		0.86432	6.58472	324.239	1.32692e-35
ENSG00000163888	CAMK2N2	protein_coding	Calcium/calmodulin-dependent protein kinase II inhibitor	calcium/calmodulin dependent protein kinase II inhibitor 2	CALCIUM/CALMODULIN-DEPENDENT PROTEIN KINASE II INHIBITOR 2; CAMK2N2;;CAMKII INHIBITORY PROTEIN; CAMKIIN;;CAMKIIN-BETA	0.62619	1.95735	23.7806	3.41427e-06
ENSG00000004660	CAMKK1	protein_coding	Protein kinase domain	calcium/calmodulin dependent protein kinase kinase 1	CALCIUM/CALMODULIN-DEPENDENT PROTEIN KINASE KINASE 1, ALPHA; CAMKK1;;CAMKK-ALPHA; CAMKKA	-1.15265	2.07639	78.4437	1.01773e-14
ENSG00000110931	CAMKK2	protein_coding	Protein kinase domain	calcium/calmodulin dependent protein kinase kinase 2	CALCIUM/CALMODULIN-DEPENDENT PROTEIN KINASE KINASE 2, BETA; CAMKK2;;CAMKK-BETA; CAMKKB;;KIAA0787	-0.035811	7.86345	1.00704	0.317673
ENSG00000143919	CAMKMT	protein_coding		calmodulin-lysine N-methyltransferase	CALMODULIN LYSINE N-METHYLTRANSFERASE; CAMKMT;;CHROMOSOME 2 OPEN READING FRAME 34; C2ORF34	-1.49573	2.27931	237.318	5.47559e-30
ENSG00000164076	CAMKV	protein_coding	Protein kinase domain	CaM kinase like vesicle associated	CAM KINASE-LIKE VESICLE-ASSOCIATED; CAMKV;;1G5	-2.49375	-0.127351	71.7807	9.30814e-14
ENSG00000164615	CAMLG	protein_coding	Calcium signal-modulating cyclophilin ligand	calcium modulating ligand	CALCIUM-MODULATING CYCLOPHILIN LIGAND; CAMLG;;CAML	-0.460027	4.40166	40.2848	4.26001e-09
ENSG00000164047	CAMP	protein_coding	Cathelicidin	cathelicidin antimicrobial peptide	CATHELICIDIN ANTIMICROBIAL PEPTIDE; CAMP;;CATIONIC ANTIMICROBIAL PROTEIN, 18-KD; CAP18;;CRAMP, MOUSE, HOMOLOG OF; CRAMPLL37, INCLUDED;;PEPTIDE ANTIBIOTIC, PR-39, PORCINE, HOMOLOG OF, INCLUDED; FALL39,INCLUDED	3.05724	-0.629762	32.4361	9.23357e-08
ENSG00000130559	CAMSAP1	protein_coding	Calponin homology domain	calmodulin regulated spectrin associated protein 1	CALMODULIN-REGULATED SPECTRIN-ASSOCIATED PROTEIN 1; CAMSAP1	-0.383538	6.15792	53.6087	3.29728e-11
ENSG00000118200	CAMSAP2	protein_coding	Calponin homology domain	calmodulin regulated spectrin associated protein family member 2	CALMODULIN-REGULATED SPECTRIN-ASSOCIATED PROTEIN 1-LIKE 1; CAMSAP1L1;;CAMSAP1-LIKE 1;;CAMSAP2;;KIAA1078	1.6078	3.4037	61.5726	2.17604e-12
ENSG00000171735	CAMTA1	protein_coding	IQ motif, EF-hand binding site	calmodulin binding transcription activator 1	CALMODULIN-BINDING TRANSCRIPTION ACTIVATOR 1; CAMTA1;;KIAA0833	-0.54507	3.63423	51.347	7.31056e-11
ENSG00000108509	CAMTA2	protein_coding	CG-1 DNA-binding domain	calmodulin binding transcription activator 2		1.05027	5.26062	159.492	1.23956e-23
ENSG00000111530	CAND1	protein_coding	Armadillo-like helical	cullin associated and neddylation dissociated 1	CULLIN-ASSOCIATED NEDDYLATION-DISSOCIATED PROTEIN 1; CAND1;;TBP-INTERACTING PROTEIN, 120-KD, A;;TIP120A;;TIP120;;p120(CAND1);;KIAA0829	-0.449766	7.89791	56.7493	1.11146e-11
ENSG00000171302	CANT1	protein_coding	Apyrase	calcium activated nucleotidase 1	CALCIUM-ACTIVATED NUCLEOTIDASE 1; CANT1;;SOLUBLE CALCIUM-ACTIVATED NUCLEOTIDASE 1; SCAN1	0.170629	6.54668	11.84	0.000803152
ENSG00000127022	CANX	protein_coding	Calreticulin/calnexin	calnexin	CALNEXIN; CANX;;CNX	-0.550496	10.3799	118.759	1.52464e-19
ENSG00000131236	CAP1	protein_coding	Adenylate cyclase-associated CAP	adenylate cyclase associated protein 1		0.643639	9.01958	255.929	2.67751e-31
ENSG00000232004	CAP1P2	processed_pseudogene				0.413163	2.02157	11.3129	0.00103936
ENSG00000042493	CAPG	protein_coding	Villin/Gelsolin	capping actin protein, gelsolin like	CAPPING PROTEIN, GELSOLIN-LIKE; CAPG;;MACROPHAGE CAPPING PROTEIN; MCP	2.39595	6.3427	606.3	3.03676e-48
ENSG00000014216	CAPN1	protein_coding	Cysteine peptidase, cysteine active site	calpain 1	CALPAIN 1; CAPN1;;CALPAIN, LARGE POLYPEPTIDE L1;;CALPAIN I, LARGE SUBUNIT; CANPL1;;CALCIUM-ACTIVATED NEUTRAL PROTEASE 1, CATALYTIC SUBUNIT; CANP1;;CALCIUM-ACTIVATED NEUTRAL PROTEASE, MU, LARGE SUBUNIT;;MU-CANP, LARGE SUBUNIT;;CALPAIN, MU, LARGE SUBU /.../U-CALPAIN, LARGE SUBUNIT;;MU-CAPN, LARGE SUBUNIT	0.301272	7.77138	21.8491	7.91927e-06
ENSG00000142330	CAPN10	protein_coding	Cysteine peptidase, cysteine active site	calpain 10	CALPAIN 10; CAPN10	0.547108	4.81918	36.7249	1.68297e-08
ENSG00000260942	CAPN10-AS1	antisense				1.57419	0.0931039	28.1765	5.29069e-07
ENSG00000103326	CAPN15	protein_coding	Zinc finger, RanBP2-type	calpain 15	SMALL OPTIC LOBES, DROSOPHILA, HOMOLOG OF; SOLH	-0.4509	6.28696	20.937	1.18437e-05
ENSG00000162909	CAPN2	protein_coding	Cysteine peptidase, cysteine active site	calpain 2	CALPAIN 2; CAPN2;;CALPAIN, LARGE POLYPEPTIDE L2;;CALPAIN II, LARGE SUBUNIT; CANPL2;;CALCIUM-ACTIVATED NEUTRAL PROTEASE 2, CATALYTIC SUBUNIT; CANP2	-0.635197	-1.29744	0.768553	0.383061
ENSG00000092529	CAPN3	protein_coding	Cysteine peptidase, cysteine active site	calpain 3	CALPAIN 3; CAPN3;;CALPAIN, LARGE POLYPEPTIDE L3;;CALPAIN III, LARGE SUBUNIT; CANPL3;;CALCIUM-ACTIVATED NEUTRAL PROTEASE 3, MUSCLE-SPECIFIC, LARGE SUBUNIT;CANP3;;p94	1.94995	-0.38178	48.8534	1.78204e-10
ENSG00000149260	CAPN5	protein_coding		calpain 5		1.71709	0.404277	26.5728	1.0365e-06
ENSG00000131375	CAPN7	protein_coding	MIT	calpain 7	CALPAIN 7; CAPN7;;PALB, ASPERGILLUS NIDULANS, HOMOLOG OF; PALBH	0.492861	5.55482	83.0292	2.57071e-15
ENSG00000126247	CAPNS1	protein_coding	EF-hand domain	calpain small subunit 1	CALPAIN, SMALL SUBUNIT 1; CAPNS1;;CALPAIN 4; CAPN4;;CANPS;;CALCIUM-DEPENDENT PROTEASE, SMALL SUBUNIT; CDPS	-0.136485	7.26228	6.50788	0.0120226
ENSG00000135387	CAPRIN1	protein_coding	Cytoplasmic activation/proliferation-associated protein-1 C term	cell cycle associated protein 1	CELL CYCLE-ASSOCIATED PROTEIN 1; CAPRIN1;;CYTOPLASMIC ACTIVATION- AND PROLIFERATION-ASSOCIATED PROTEIN 1;;CAPRIN 1;;MEMBRANE COMPONENT, CHROMOSOME 11, SURFACE MARKER 1; M11S1;;GPI-ANCHORED MEMBRANE PROTEIN 1; GPIAP1;;GPI-ANCHORED MEMBRANE PROTEIN, 1 /.../ GRIP137;;p137GPI;;RNA GRANULE PROTEIN 105; RNG105	-0.573169	9.0889	298.173	4.79775e-34
ENSG00000110888	CAPRIN2	protein_coding	Caprin	caprin family member 2	CAPRIN FAMILY, MEMBER 2; CAPRIN2;;CYTOPLASMIC ACTIVATION- AND PROLIFERATION-ASSOCIATED PROTEIN 2;;CAPRIN 2;;EEG1;;RNA GRANULE PROTEIN 140; RNG140;;C1q DOMAIN-CONTAINING PROTEIN 1; C1QDC1;;KIAA1873	2.22441	2.46267	228.806	2.29683e-29
ENSG00000105519	CAPS	protein_coding	EF-hand domain	calcyphosine	CALCYPHOSINE; CAPS	2.9106	1.41254	191.35	1.98539e-26
ENSG00000116489	CAPZA1	protein_coding	F-actin-capping protein subunit alpha	capping actin protein of muscle Z-line alpha subunit 1	CAPPING PROTEIN, ALPHA-1; CAPZA1;;CAP PROTEIN, ACTIN, ALPHA-1 SUBUNIT; CAPPA1	-0.0570927	8.59958	1.09265	0.298027
ENSG00000198898	CAPZA2	protein_coding		capping actin protein of muscle Z-line alpha subunit 2	CAPPING PROTEIN, ALPHA-2; CAPZA2;;CAP PROTEIN, ACTIN, ALPHA-2 SUBUNIT; CAPPA2	-0.0507898	6.78047	0.44926	0.504
ENSG00000077549	CAPZB	protein_coding	F-actin-capping protein subunit beta	capping actin protein of muscle Z-line beta subunit	CAPPING PROTEIN, BETA; CAPZB;;CAP PROTEIN, ACTIN, BETA; CAPPB	-0.0510638	7.91646	1.9208	0.168389
ENSG00000100065	CARD10	protein_coding	CARD domain	caspase recruitment domain family member 10	CASPASE RECRUITMENT DOMAIN-CONTAINING PROTEIN 10; CARD10;;CARD-MAGUK PROTEIN 3; CARMA3;;BCL10-INTERACTING MAGUK PROTEIN 1; BIMP1	0.168147	-0.327513	0.287169	0.593052
ENSG00000204397	CARD16	protein_coding	CARD domain	caspase recruitment domain family member 16	CASPASE RECRUITMENT DOMAIN-CONTAINING PROTEIN 16; CARD16;;CASPASE RECRUITMENT DOMAIN-ONLY PROTEIN; COP; COP1;;CARD-ONLY PROTEIN;;PSEUDO-INTERLEUKIN 1-BETA-CONVERTING ENZYME;;PSEUDO-IL1B-CONVERTING ENZYME;;PSEUDO-ICE	1.47745	1.10396	71.7343	8.09907e-14
ENSG00000165233	CARD19	protein_coding	Death-like domain	caspase recruitment domain family member 19		1.72788	4.84318	263.024	8.81557e-32
ENSG00000132357	CARD6	protein_coding	CARD domain	caspase recruitment domain family member 6	CASPASE RECRUITMENT DOMAIN-CONTAINING PROTEIN 6; CARD6CARD-CONTAINING INHIBITOR OF NOD1- AND CARDIAK-INDUCED NFKB ACTIVATION1, INCLUDED; CINCIN1, INCLUDED	0.91564	4.72184	184.435	7.56939e-26
ENSG00000105483	CARD8	protein_coding		caspase recruitment domain family member 8		0.718298	6.63418	128.07	1.54377e-20
ENSG00000268001	CARD8-AS1	antisense				0.798439	0.821988	25.4249	1.68641e-06
ENSG00000187796	CARD9	protein_coding	CARD domain	caspase recruitment domain family member 9	CASPASE RECRUITMENT DOMAIN-CONTAINING PROTEIN 9; CARD9	0.552682	6.64502	21.0698	1.13662e-05
ENSG00000138380	CARF	protein_coding	Calcium-responsive transcription factor	calcium responsive transcription factor	CALCIUM RESPONSE FACTOR; CARF;;ALS2 CHROMOSOME REGION GENE 8; ALS2CR8	2.07775	2.89071	314.747	4.77882e-35
ENSG00000153048	CARHSP1	protein_coding	Cold-shock protein, DNA-binding	calcium regulated heat stable protein 1	CALCIUM-REGULATED HEAT-STABLE PROTEIN 1; CARHSP1;;CALCIUM-REGULATED HEAT-STABLE PROTEIN, 24-KD; CRHSP24	0.536079	5.36634	81.3573	4.22954e-15
ENSG00000142453	CARM1	protein_coding	Histone-arginine methyltransferase CARM1, N-terminal	coactivator associated arginine methyltransferase 1	COACTIVATOR-ASSOCIATED ARGININE METHYLTRANSFERASE 1; CARM1;;PROTEIN ARGININE N-METHYLTRANSFERASE 4; PRMT4	-1.6643	6.2713	516.87	7.19415e-45
ENSG00000159753	CARMIL2	protein_coding	Leucine-rich repeat	capping protein regulator and myosin 1 linker 2	RGD-, LEUCINE-RICH REPEAT-, TROPOMODULIN DOMAIN-, AND PROLINE-RICHDOMAIN-CONTAINING PROTEIN;;RLTPR	-0.064713	5.6702	0.511615	0.475858
ENSG00000156017	CARNMT1	protein_coding	N2227-like	carnosine N-methyltransferase 1	CARNOSINE N-METHYLTRANSFERASE 1; CARNMT1;;CHROMOSOME 9 OPEN READING FRAME 41; C9ORF41;;UPF0586	-0.729785	5.20131	70.7094	1.11928e-13
ENSG00000110619	CARS	protein_coding	Aminoacyl-tRNA synthetase, class 1a, anticodon-binding	cysteinyl-tRNA synthetase		-0.938285	6.38557	164.727	4.09597e-24
ENSG00000134905	CARS2	protein_coding	Aminoacyl-tRNA synthetase, class 1a, anticodon-binding	cysteinyl-tRNA synthetase 2, mitochondrial (putative)	CYSTEINYL-tRNA SYNTHETASE 2; CARS2;;CYSTEINYL-tRNA SYNTHETASE, MITOCHONDRIAL;;MITOCHONDRIAL CYSRS	-0.658613	6.30151	232.809	1.1652e-29
ENSG00000108349	CASC3	protein_coding	Btz domain	microRNA 6866	CANCER SUSCEPTIBILITY CANDIDATE 3; CASC3;;MLN51 GENE; MLN51;;BARENTSZ, DROSOPHILA, HOMOLOG OF	-0.0750899	7.5667	6.15554	0.0145135
ENSG00000166734	CASC4	protein_coding	GOLM1/CASC4 family	cancer susceptibility candidate 4		0.769506	6.61091	173.483	6.72508e-25
ENSG00000127995	CASD1	protein_coding		CAS1 domain containing 1	CAS1 DOMAIN-CONTAINING PROTEIN 1; CASD1;;CHROMOSOME 7 OPEN READING FRAME 12; C7ORF12	0.394994	4.95265	26.0741	1.27987e-06
ENSG00000147044	CASK	protein_coding	Protein kinase domain	calcium/calmodulin dependent serine protein kinase	CALCIUM/CALMODULIN-DEPENDENT SERINE PROTEIN KINASE; CASK;;VERTEBRATE LIN2 HOMOLOG; LIN2;;CAMGUK, DROSOPHILA, HOMOLOG OF; CMG	0.690615	3.46837	84.7087	1.56565e-15
ENSG00000167971	CASKIN1	protein_coding	SH3 domain	CASK interacting protein 1	CASK-INTERACTING PROTEIN 1; CASKIN1;;KIAA1306	0.991247	1.01969	14.1788	0.000261025
ENSG00000177303	CASKIN2	protein_coding	SH3 domain	CASK interacting protein 2	CASK-INTERACTING PROTEIN 2; CASKIN2;;KIAA1139	-1.30435	1.09204	39.8946	4.94424e-09
ENSG00000137752	CASP1	protein_coding	Peptidase C14, p20 domain	caspase 1	CASPASE 1, APOPTOSIS-RELATED CYSTEINE PROTEASE; CASP1;;INTERLEUKIN 1-BETA CONVERTASE; IL1BC;;IL1B-CONVERTASE;;IL1B-CONVERTING ENZYME; ICE	1.12541	4.27777	154.144	3.92791e-23
ENSG00000003400	CASP10	protein_coding	Peptidase C14, p20 domain	caspase 10	CASPASE 10, APOPTOSIS-RELATED CYSTEINE PROTEASE; CASP10;;MCH4CASPASE 10, ISOFORM B, INCLUDED; CASP10B, INCLUDED;;FADD-LIKE ICE 2, INCLUDED; FLICE2, INCLUDED	0.514277	4.21945	70.7951	1.08934e-13
ENSG00000106144	CASP2	protein_coding	Peptidase C14, p20 domain	caspase 2	CASPASE 2, APOPTOSIS-RELATED CYSTEINE PROTEASE; CASP2;;NEURAL PRECURSOR CELL EXPRESSED, DEVELOPMENTALLY DOWNREGULATED 2;NEDD2;;ICE AND CED3 HOMOLOG 1; ICH1	0.216117	6.90337	32.5861	8.69194e-08
ENSG00000164305	CASP3	protein_coding	Peptidase C14, p20 domain	caspase 3	CASPASE 3, APOPTOSIS-RELATED CYSTEINE PROTEASE; CASP3;;PARP CLEAVAGE PROTEASE;;APOPAIN;;CPP32;;YAMA	0.315189	5.96376	17.4172	5.77654e-05
ENSG00000196954	CASP4	protein_coding	Peptidase C14, p20 domain	caspase 4	CASPASE 4, APOPTOSIS-RELATED CYSTEINE PROTEASE; CASP4;;ICE AND CED3 HOMOLOG 2; ICH2;;CASPASE 11, MOUSE, HOMOLOG OF; CASP11	0.184036	5.32367	12.1926	0.000676568
ENSG00000138794	CASP6	protein_coding	Peptidase C14, p20 domain	caspase 6	CASPASE 6, APOPTOSIS-RELATED CYSTEINE PROTEASE; CASP6;;APOPTOTIC CYSTEINE PROTEASE MCH2	0.181794	3.82786	6.40683	0.0126877
ENSG00000165806	CASP7	protein_coding	Peptidase C14, p20 domain	caspase 7		0.332581	4.18333	32.2444	9.97637e-08
ENSG00000064012	CASP8	protein_coding	Peptidase C14, p20 domain	caspase 8	CASPASE 8, APOPTOSIS-RELATED CYSTEINE PROTEASE; CASP8;;MORT1-ASSOCIATED CED3 HOMOLOG; MACH;;FADD-HOMOLOGOUS ICE/CED3-LIKE PROTEASE;;FADD-LIKE ICE; FLICE;;MCH5	0.786342	5.44453	191.748	1.84009e-26
ENSG00000118412	CASP8AP2	protein_coding		caspase 8 associated protein 2	CASPASE 8-ASSOCIATED PROTEIN 2; CASP8AP2;;FLICE-ASSOCIATED HUGE PROTEIN; FLASH;;KIAA1315	0.185078	5.98979	7.90318	0.00578269
ENSG00000132906	CASP9	protein_coding	Peptidase C14, p20 domain	caspase 9	CASPASE 9, APOPTOSIS-RELATED CYSTEINE PROTEASE; CASP9;;APOPTOTIC PROTEASE ACTIVATING FACTOR 3; APAF3	1.22838	3.59869	254.088	3.5846e-31
ENSG00000087589	CASS4	protein_coding	SH3 domain	Cas scaffolding protein family member 4		2.91385	3.82488	254.474	3.37133e-31
ENSG00000153113	CAST	protein_coding	Proteinase inhibitor I27, calpastatin	calpastatin		1.0792	6.0026	441.772	1.20716e-41
ENSG00000130940	CASZ1	protein_coding	Zinc finger, C2H2	castor zinc finger 1	CASTOR ZINC FINGER PROTEIN 1; CASZ1;;SURVIVAL-RELATED GENE; SRG	1.87463	3.79695	255.969	2.66068e-31
ENSG00000121691	CAT	protein_coding	Catalase haem-binding site	catalase	CATALASE; CAT	0.324395	8.86153	72.8067	5.78453e-14
ENSG00000175294	CATSPER1	protein_coding	Ion transport domain	cation channel sperm associated 1	CATION CHANNEL, SPERM-ASSOCIATED, 1; CATSPER1;;CATSPER	2.54618	0.204148	39.2981	6.21319e-09
ENSG00000166762	CATSPER2	protein_coding	Ion transport domain	cation channel sperm associated 2	CATION CHANNEL, SPERM-ASSOCIATED, 2; CATSPER2	0.973389	0.304792	17.6341	5.23083e-05
ENSG00000099338	CATSPERG	protein_coding	Cation channel sperm-associated protein, subunit gamma	cation channel sperm associated auxiliary subunit gamma	CATION CHANNEL, SPERM-ASSOCIATED, GAMMA; CATSPERG	2.17001	-1.21442	12.8107	0.000501799
ENSG00000099625	CBARP	protein_coding		CACN beta subunit associated regulatory protein		-0.879564	1.03005	16.9767	7.07067e-05
ENSG00000078699	CBFA2T2	protein_coding	Zinc finger, MYND-type	CBFA2/RUNX1 translocation partner 2		0.76351	4.88002	129.931	9.87118e-21
ENSG00000129993	CBFA2T3	protein_coding	Zinc finger, MYND-type	CBFA2/RUNX1 translocation partner 3	CORE-BINDING FACTOR, ALPHA SUBUNIT 2, TRANSLOCATED TO, 3; CBFA2T3;;MTG8-RELATED GENE 2; MTGR2;;MYELOID TRANSLOCATION GENE ON CHROMOSOME 16; MTG16;;ZINC FINGER MYND DOMAIN-CONTAINING PROTEIN 4; ZMYND4;;ETO2	-0.458493	4.96123	30.1072	2.38126e-07
ENSG00000067955	CBFB	protein_coding	Core binding factor, beta subunit	core-binding factor beta subunit	CORE-BINDING FACTOR, BETA SUBUNIT; CBFB;;POLYOMAVIRUS ENHANCER-BINDING PROTEIN 2-BETA; PEBP2BCBFB/MYH11 FUSION GENE, INCLUDED	-0.0779463	7.41522	2.01846	0.158041
ENSG00000110395	CBL	protein_coding	SH2 domain	Cbl proto-oncogene	CAS-BR-M MURINE ECOTROPIC RETROVIRAL TRANSFORMING SEQUENCE HOMOLOG;CBL;;CASITAS B-LINEAGE LYMPHOMA PROTOONCOGENE;;C-CBL;;ONCOGENE CBL;;ONCOGENE CBL2;;RNF55CBL/MLL FUSION GENE, INCLUDED	0.687464	8.29236	106.418	3.67048e-18
ENSG00000114423	CBLB	protein_coding	UBA-like	Cbl proto-oncogene B	CAS-BR-M MURINE ECOTROPIC RETROVIRAL TRANSFORMING SEQUENCE B; CBLB	0.357462	3.78554	24.6372	2.36146e-06
ENSG00000105879	CBLL1	protein_coding	Zinc finger, RING-type	Cbl proto-oncogene like 1	CAS-BR-M MURINE ECTOPIC RETROVIRAL TRANSFORMING SEQUENCE LIKE-1; CBLL1;;HAKAI, MOUSE, HOMOLOG OF; HAKAI	-0.167129	6.06908	11.8193	0.000811291
ENSG00000139899	CBLN3	protein_coding	C1q domain	cerebellin 3 precursor	PRECEREBELLIN 3; CBLN3	-0.0982686	0.0196983	0.0843124	0.772047
ENSG00000159228	CBR1	protein_coding	Short-chain dehydrogenase/reductase SDR	carbonyl reductase 1	CARBONYL REDUCTASE 1; CBR1;;CARBONYL REDUCTASE; CBR	-0.715799	4.0767	100.077	2.01858e-17
ENSG00000236830	CBR3-AS1	processed_transcript				4.34487	-0.922113	41.4625	2.91197e-09
ENSG00000145439	CBR4	protein_coding	Short-chain dehydrogenase/reductase SDR	carbonyl reductase 4		-0.587219	4.55652	45.3265	6.44003e-10
ENSG00000160200	CBS	protein_coding	CBS domain	cystathionine-beta-synthase	CYSTATHIONINE BETA-SYNTHASE; CBS	-1.36075	1.28999	74.7122	3.19618e-14
ENSG00000172785	CBWD1	protein_coding	CobW/HypB/UreG, nucleotide-binding domain	COBW domain containing 2		-0.279951	4.34477	13.7515	0.000319778
ENSG00000136682	CBWD2	protein_coding	CobW/HypB/UreG, nucleotide-binding domain	COBW domain containing 2	COBALAMIN SYNTHETASE W DOMAIN-CONTAINING PROTEIN 2; CBWD2;;COBW DOMAIN-CONTAINING PROTEIN 2	0.160298	4.10975	5.40432	0.0218016
ENSG00000196873	CBWD3	protein_coding	CobW/HypB/UreG, nucleotide-binding domain	COBW domain containing 6	COBALAMIN SYNTHETASE W DOMAIN-CONTAINING PROTEIN 3; CBWD3;;COBW DOMAIN-CONTAINING PROTEIN 3	0.183412	-0.280795	0.499447	0.48114
ENSG00000147996	CBWD5	protein_coding	CobW/HypB/UreG, nucleotide-binding domain	COBW domain containing 6		0.34027	2.63382	9.46733	0.00260216
ENSG00000215126	CBWD7	protein_coding	CobW/HypB/UreG, nucleotide-binding domain	COBW domain containing 6		0.0698478	0.579699	0.156452	0.693161
ENSG00000108468	CBX1	protein_coding	Chromo/chromo shadow domain	chromobox 1	CHROMOBOX HOMOLOG 1; CBX1;;CBX;;HP1, DROSOPHILA, HOMOLOG OF, BETA;;HP1-BETA	0.134111	6.69897	7.648	0.00660104
ENSG00000230823	CBX1P1	processed_pseudogene				0.0141798	3.02351	0.0279093	0.867609
ENSG00000214322	CBX1P2	processed_pseudogene				0.202697	1.12371	1.59735	0.208777
ENSG00000173894	CBX2	protein_coding	Chromo/chromo shadow domain	chromobox 2	CHROMOBOX HOMOLOG 2, DROSOPHILA POLYCOMB CLASS; CBX2;;M33, MOUSE, HOMOLOG OF	-0.66201	6.11513	99.2379	2.53868e-17
ENSG00000122565	CBX3	protein_coding	Chromo/chromo shadow domain	chromobox 3	CHROMOBOX HOMOLOG 3; CBX3;;HP1, DROSOPHILA, HOMOLOG OF, GAMMA;;HP1-GAMMA	-0.300446	7.99893	13.7053	0.000326901
ENSG00000250045	CBX3P3	processed_pseudogene				0.132332	1.53517	0.498579	0.481521
ENSG00000141582	CBX4	protein_coding	Chromo/chromo shadow domain	chromobox 4	CHROMOBOX HOMOLOG 4, DROSOPHILA POLYCOMB CLASS; CBX4;;POLYCOMB, DROSOPHILA, HOMOLOG OF, 2; PC2	0.285445	6.98576	10.5663	0.00150225
ENSG00000094916	CBX5	protein_coding	Chromo/chromo shadow domain	microRNA 3198-2	CHROMOBOX HOMOLOG 5; CBX5;;HP1, DROSOPHILA, HOMOLOG OF, ALPHA;;HP1-ALPHA;;HETEROCHROMATIN PROTEIN 1; HP1	0.738089	7.68061	105.552	4.61881e-18
ENSG00000183741	CBX6	protein_coding	Chromo/chromo shadow domain	chromobox 6		-0.506223	7.33429	92.4386	1.68476e-16
ENSG00000100307	CBX7	protein_coding	Chromo/chromo shadow domain	chromobox 7	CHROMOBOX HOMOLOG 7; CBX7	2.54374	2.73886	133.962	3.79049e-21
ENSG00000141570	CBX8	protein_coding	Chromo/chromo shadow domain	chromobox 8		0.699327	5.93153	175.125	4.82124e-25
ENSG00000100211	CBY1	protein_coding	Chibby family	chibby family member 1, beta catenin antagonist	CHIBBY; CBY;;HS508I15A;;C22ORF2	-0.0763465	2.61338	0.922347	0.338829
ENSG00000132024	CC2D1A	protein_coding	C2 domain	coiled-coil and C2 domain containing 1A	COILED-COIL AND C2 DOMAINS-CONTAINING PROTEIN 1A; CC2D1A	0.270022	5.60334	9.26482	0.00288225
ENSG00000154222	CC2D1B	protein_coding	C2 domain	coiled-coil and C2 domain containing 1B		1.16946	5.26807	331.339	5.18125e-36
ENSG00000048342	CC2D2A	protein_coding		coiled-coil and C2 domain containing 2A	COILED-COIL AND C2 DOMAINS-CONTAINING PROTEIN 2A; CC2D2A;;KIAA1345	-2.85512	-0.768589	142.331	1.77667e-21
ENSG00000188649	CC2D2B	protein_coding		chromosome 10 open reading frame 131		4.51192	-0.0681642	50.7973	9.73964e-11
ENSG00000060339	CCAR1	protein_coding	Cell cycle and apoptosis regulator protein	cell division cycle and apoptosis regulator 1	CELL DIVISION CYCLE AND APOPTOSIS REGULATOR 1; CCAR1;;CELL CYCLE AND APOPTOSIS REGULATORY PROTEIN 1; CARP1	-0.00206362	6.95071	0.00194413	0.964906
ENSG00000158941	CCAR2	protein_coding	EF-hand domain pair	cell cycle and apoptosis regulator 2		-0.388948	7.60845	53.6171	3.28765e-11
ENSG00000135736	CCDC102A	protein_coding	Myosin tail	coiled-coil domain containing 102A		-0.504703	2.35346	22.2484	6.64713e-06
ENSG00000150636	CCDC102B	protein_coding		coiled-coil domain containing 102B		0.464407	-0.775194	1.27273	0.26155
ENSG00000173581	CCDC106	protein_coding	Coiled-coil domain-containing protein 106	coiled-coil domain containing 106	COILED-COIL DOMAIN-CONTAINING PROTEIN 106; CCDC106	-0.927123	3.40411	90.1511	3.22993e-16
ENSG00000159884	CCDC107	protein_coding		coiled-coil domain containing 107		-0.115778	2.66686	1.24705	0.266391
ENSG00000164221	CCDC112	protein_coding		coiled-coil domain containing 112		-0.7188	3.24083	67.0956	3.5542e-13
ENSG00000103021	CCDC113	protein_coding		coiled-coil domain containing 113	COILED-COIL DOMAIN-CONTAINING PROTEIN 113; CCDC113	-1.46067	1.62507	91.2513	2.35969e-16
ENSG00000105479	CCDC114	protein_coding	ODA1/DCC2 family	coiled-coil domain containing 114	COILED-COIL DOMAIN-CONTAINING PROTEIN 114: CCDC114	3.62045	-1.11753	24.4043	2.68337e-06
ENSG00000136710	CCDC115	protein_coding		coiled-coil domain containing 115	COILED-COIL DOMAIN-CONTAINING PROTEIN 115; CCDC115;;COILED-COIL PROTEIN 1; CCP1	0.0381846	4.49522	0.352132	0.554048
ENSG00000159873	CCDC117	protein_coding	Coiled-coil domain-containing protein 117	coiled-coil domain containing 117		-0.266654	5.80046	9.66045	0.00236114
ENSG00000160799	CCDC12	protein_coding	mRNA splicing factor, Cwf18	coiled-coil domain containing 12		-0.292352	4.97825	18.6628	3.27691e-05
ENSG00000176714	CCDC121	protein_coding	Domain of unknown function DUF4515	coiled-coil domain containing 121		1.14799	1.87217	103.845	7.28568e-18
ENSG00000007080	CCDC124	protein_coding	High mobility group box domain	coiled-coil domain containing 124		-1.08861	6.02429	145.088	2.92141e-22
ENSG00000183323	CCDC125	protein_coding		coiled-coil domain containing 125		0.425093	3.27492	18.4223	3.65398e-05
ENSG00000169193	CCDC126	protein_coding	Glycosyltransferase family 18	coiled-coil domain containing 126		0.773134	3.3947	52.6455	4.62197e-11
ENSG00000164366	CCDC127	protein_coding		coiled-coil domain containing 127		0.124554	4.01868	5.68358	0.0187238
ENSG00000104957	CCDC130	protein_coding	CWC16 protein	coiled-coil domain containing 130		0.930018	4.19419	90.2834	3.10994e-16
ENSG00000100147	CCDC134	protein_coding	Coiled-coil domain-containing protein 134	coiled-coil domain containing 134		0.386919	3.03171	16.8754	7.40834e-05
ENSG00000128596	CCDC136	protein_coding		coiled-coil domain containing 136	COILED-COIL DOMAIN-CONTAINING PROTEIN 136; CCDC136;;NAG6;;KIAA1793	1.41271	2.19783	65.1019	6.79122e-13
ENSG00000185298	CCDC137	protein_coding	Coiled-coil domain-containing protein 137	coiled-coil domain containing 137	COILED-COIL DOMAIN-CONTAINING PROTEIN 137; CCDC137	-0.783476	5.22137	105.693	4.44858e-18
ENSG00000163006	CCDC138	protein_coding		coiled-coil domain containing 138		-1.0287	3.81158	135.082	2.91339e-21
ENSG00000175455	CCDC14	protein_coding	Coiled-coil domain-containing protein 14	coiled-coil domain containing 14	COILED-COIL DOMAIN-CONTAINING PROTEIN 14; CCDC14	0.393244	5.58541	27.0514	8.47276e-07
ENSG00000135637	CCDC142	protein_coding	Coiled-coil domain-containing protein 142	coiled-coil domain containing 142		0.797369	3.43711	66.6995	4.0398e-13
ENSG00000135205	CCDC146	protein_coding		coiled-coil domain containing 146		2.19615	2.0424	157.924	1.73414e-23
ENSG00000181982	CCDC149	protein_coding	Coiled-coil domain-containing protein 149-A	coiled-coil domain containing 149		0.199867	-0.0958935	0.447523	0.504824
ENSG00000149548	CCDC15	protein_coding		coiled-coil domain containing 15		0.462085	2.03693	15.5206	0.000138852
ENSG00000144395	CCDC150	protein_coding		coiled-coil domain containing 150		1.68404	1.01198	76.5824	1.79602e-14
ENSG00000248712	CCDC153	protein_coding		coiled-coil domain containing 153		1.64305	-0.98578	18.4734	3.57021e-05
ENSG00000197599	CCDC154	protein_coding	Coiled-coil domain-containing protein 154	coiled-coil domain containing 154		-0.2433	-0.761889	0.388746	0.534166
ENSG00000187860	CCDC157	protein_coding		coiled-coil domain containing 157		0.176875	0.710529	0.858665	0.356009
ENSG00000183401	CCDC159	protein_coding		coiled-coil domain containing 159		1.07976	2.6133	59.1782	4.8609e-12
ENSG00000280670	CCDC163	protein_coding				0.228876	0.525642	1.921	0.168368
ENSG00000198937	CCDC167	protein_coding	Coiled-coil domain-containing protein 167	coiled-coil domain containing 167		-0.583669	3.17355	36.8875	1.57944e-08
ENSG00000242715	CCDC169	protein_coding	Protein of unknown function DUF4600	coiled-coil domain containing 169		-1.42545	2.15071	110.804	1.1617e-18
ENSG00000159588	CCDC17	protein_coding		coiled-coil domain containing 17		1.47743	-0.757915	14.9962	0.000177504
ENSG00000164989	CCDC171	protein_coding		coiled-coil domain containing 171		-0.0637435	0.82827	0.180799	0.671465
ENSG00000154781	CCDC174	protein_coding	Protein of unknown function DUF4078	coiled-coil domain containing 174	COILED-COIL DOMAIN-CONTAINING PROTEIN 174: CCDC174;;HEMATOPOIETIC STEM/PROGENITOR CELL-EXPRESSED GENE 212; HSPC212	0.286086	4.8317	32.9031	7.65153e-08
ENSG00000122483	CCDC18	protein_coding	Coiled-coil domain-containing protein 18/Cytoskeletal protein Sojo	coiled-coil domain containing 18		0.618431	4.06867	45.4654	6.11902e-10
ENSG00000213213	CCDC183	protein_coding		coiled-coil domain containing 183	COILED-COIL DOMAIN-CONTAINING PROTEIN 183; CCDC183;;KIAA1984	1.1545	-0.537218	10.5308	0.00152896
ENSG00000228544	CCDC183-AS1	antisense				1.23305	0.799927	20.8823	1.21317e-05
ENSG00000165813	CCDC186	protein_coding		microRNA 2110		1.05946	5.08218	136.887	1.91123e-21
ENSG00000196118	CCDC189	protein_coding		coiled-coil domain containing 189		1.48467	2.70396	109.537	1.61585e-18
ENSG00000223745	CCDC18-AS1	processed_transcript				2.20912	0.948658	63.4404	1.17152e-12
ENSG00000163617	CCDC191	protein_coding	Coiled-coil domain-containing protein 191	coiled-coil domain containing 191		0.330634	-0.161896	1.76822	0.186174
ENSG00000101997	CCDC22	protein_coding	Coiled-coil domain-containing protein 22	coiled-coil domain containing 22	COILED-COIL DOMAIN-CONTAINING PROTEIN 22; CCDC22	0.537767	5.50358	51.5519	6.79867e-11
ENSG00000159214	CCDC24	protein_coding		coiled-coil domain containing 24		0.287704	0.0485817	1.60858	0.207196
ENSG00000147419	CCDC25	protein_coding	Domain of unknown function DUF814	coiled-coil domain containing 25		-0.780236	5.35459	165.57	3.43365e-24
ENSG00000229140	CCDC26	lincRNA				-4.03748	-1.0556	88.5044	1.24221e-15
ENSG00000024862	CCDC28A	protein_coding	Domain of unknown function DUF4061	coiled-coil domain containing 28A	COILED-COIL DOMAIN-CONTAINING 28A; CCDC28A;;CHROMOSOME 6 OPEN READING FRAME 80; C6ORF80CCDC28A/NUP98 FUSION GENE, INCLUDED	0.0981182	4.11489	2.39578	0.124349
ENSG00000186409	CCDC30	protein_coding	Protein of unknown function DUF4686	coiled-coil domain containing 30		0.899718	-0.00662309	9.29766	0.00283479
ENSG00000109881	CCDC34	protein_coding		coiled-coil domain containing 34	COILED-COIL DOMAIN-CONTAINING PROTEIN 34; CCDC34;;NY-REN-41	-0.9993	3.88573	163.984	4.78663e-24
ENSG00000141519	CCDC40	protein_coding	E3 ubiquitin ligase, BRE1	coiled-coil domain containing 40	COILED-COIL DOMAIN-CONTAINING PROTEIN 40; CCDC40;;KIAA1640	2.5825	-0.094577	23.3471	4.11884e-06
ENSG00000180329	CCDC43	protein_coding		coiled-coil domain containing 43		-0.515998	5.24809	88.2391	5.59627e-16
ENSG00000108588	CCDC47	protein_coding	Protein of unknown function DUF1682	coiled-coil domain containing 47		-0.622134	7.00973	154.134	3.93687e-23
ENSG00000152492	CCDC50	protein_coding	Coiled-coil domain-containing protein 50, N-terminal	coiled-coil domain containing 50	COILED-COIL DOMAIN-CONTAINING PROTEIN 50; CCDC50;;YMER;;CHROMOSOME 3 OPEN READING FRAME 6; C3ORF6	-0.180173	6.31934	14.7987	0.000194776
ENSG00000164051	CCDC51	protein_coding		coiled-coil domain containing 51		-1.10287	4.04014	225.378	4.13322e-29
ENSG00000120860	CCDC53	protein_coding	WASH complex, subunit CCDC53	coiled-coil domain containing 53		0.627658	3.08355	62.6363	1.52815e-12
ENSG00000176155	CCDC57	protein_coding		coiled-coil domain containing 57		0.447633	3.43901	23.6322	3.64036e-06
ENSG00000160124	CCDC58	protein_coding	Caffeine-induced death protein 2	coiled-coil domain containing 58		-1.69898	3.68381	321.887	1.81819e-35
ENSG00000133773	CCDC59	protein_coding	Fyv7/TAP26	coiled-coil domain containing 59		-1.02601	4.78143	222.693	6.57517e-29
ENSG00000108091	CCDC6	protein_coding	Protein of unknown function DUF2046	coiled-coil domain containing 6	COILED-COIL DOMAIN-CONTAINING PROTEIN 6; CCDC6;;H4 GENE;;D10S170;;TRANSFORMING SEQUENCE, THYROID 1; TST1PTC1 CHIMERIC ONCOGENE, INCLUDED;;H4/RET FUSION GENE, INCLUDED;;H4/PDGFRB FUSION GENE, INCLUDED	-0.717228	6.1822	191.328	1.99374e-26
ENSG00000104983	CCDC61	protein_coding		coiled-coil domain containing 61		-0.0783265	2.85639	0.522151	0.47136
ENSG00000130783	CCDC62	protein_coding		coiled-coil domain containing 62	COILED-COIL DOMAIN-CONTAINING PROTEIN 62: CCDC62;;ESTROGEN RECEPTOR-ASSOCIATED PROTEIN, 75-KD; ERAP75	0.28816	-0.352981	1.14643	0.286489
ENSG00000180376	CCDC66	protein_coding		coiled-coil domain containing 66		-0.0806796	3.6181	0.963286	0.328374
ENSG00000198624	CCDC69	protein_coding		coiled-coil domain containing 69		1.26711	5.26121	326.42	9.92446e-36
ENSG00000216937	CCDC7	protein_coding	Coiled-coil domain-containing protein 7	coiled-coil domain containing 7		0.886815	0.235958	17.0018	6.98957e-05
ENSG00000177352	CCDC71	protein_coding	Coiled-coil domain-containing protein 71/71L	coiled-coil domain containing 71		-0.379357	4.56745	25.5665	1.58773e-06
ENSG00000253276	CCDC71L	protein_coding	Coiled-coil domain-containing protein 71/71L	coiled-coil domain containing 71-like		0.791663	4.62676	117.348	2.17452e-19
ENSG00000186714	CCDC73	protein_coding	Coiled-coil domain-containing protein 73	coiled-coil domain containing 73	COILED-COIL DOMAIN-CONTAINING PROTEIN 73: CCDC73;;NY-SAR-79	-0.32299	-0.847975	1.10381	0.295585
ENSG00000182921	CCDC75P1	processed_pseudogene				0.130469	0.635294	0.55652	0.457154
ENSG00000120647	CCDC77	protein_coding		coiled-coil domain containing 77		-0.11535	3.85486	2.88921	0.091817
ENSG00000162004	CCDC78	protein_coding		coiled-coil domain containing 78	COILED-COIL DOMAIN-CONTAINING PROTEIN 78; CCDC78;;CHROMOSOME 16 OPEN READING FRAME 25; C16ORF25	1.45822	-0.108874	19.1127	2.67457e-05
ENSG00000149231	CCDC82	protein_coding	Domain of unknown function DUF4196	coiled-coil domain containing 82		0.463251	4.48603	29.9202	2.57137e-07
ENSG00000186166	CCDC84	protein_coding	Coiled-coil domain-containing protein 84	coiled-coil domain containing 84		0.0135565	1.98107	0.0136708	0.907121
ENSG00000175602	CCDC85B	protein_coding	CCDC85 family	coiled-coil domain containing 85B	COILED-COIL DOMAIN-CONTAINING PROTEIN 85B; CCDC85B;;DELTA ANTIGEN-INTERACTING PROTEIN A; DIPA;;HEPATITIS DELTA ANTIGEN-INTERACTING PROTEIN A	-0.611766	5.8259	33.3487	6.46127e-08
ENSG00000110104	CCDC86	protein_coding	Cgr1-like	coiled-coil domain containing 86	COILED-COIL DOMAIN-CONTAINING PROTEIN 86; CCDC86;;CYTOKINE-INDUCED PROTEIN WITH COILED-COIL DOMAIN; CYCLON	-1.90353	5.9243	339.121	1.92806e-36
ENSG00000115355	CCDC88A	protein_coding	Hook-related protein family	coiled-coil domain containing 88A	COILED-COIL DOMAIN-CONTAINING PROTEIN 88A; CCDC88A;;HOOK RELATED PROTEIN 1; HKRP1;;GIRDERS OF ACTIN FILAMENT; GIRDIN;;AKT PHOSPHORYLATION ENHANCER; APE;;G-ALPHA-INTERACTING VESICLE-ASSOCIATED PROTEIN; GIV;;KIAA1212	0.414341	7.34244	46.5114	4.1688e-10
ENSG00000168071	CCDC88B	protein_coding	Hook-related protein family	coiled-coil domain containing 88B	COILED-COIL DOMAIN-CONTAINING PROTEIN 88B; CCDC88B;;HOOK-RELATED PROTEIN 3; HKRP3;;GPR78-INTERACTING PROTEIN INDUCED BY ENDOPLASMIC RETICULUM STRESS;GIPIE	2.15484	7.75993	421.384	1.47592e-40
ENSG00000015133	CCDC88C	protein_coding	Hook-related protein family	coiled-coil domain containing 88C	COILED-COIL DOMAIN-CONTAINING PROTEIN 88C; CCDC88C;;HOOK-RELATED PROTEIN 2; HKRP2;;DAPLE;;KIAA1509	0.417188	6.08605	24.9651	2.05205e-06
ENSG00000105321	CCDC9	protein_coding	Protein of unknown function DUF4594	coiled-coil domain containing 9		0.037749	4.50916	0.197375	0.657664
ENSG00000137500	CCDC90B	protein_coding	Coiled-coil domain-containing protein 90-like	coiled-coil domain containing 90B		-0.143602	4.95784	5.70196	0.018538
ENSG00000123106	CCDC91	protein_coding		coiled-coil domain containing 91		-0.51302	4.82229	46.9738	3.52122e-10
ENSG00000119242	CCDC92	protein_coding	Coiled-coil domain-containing protein 92	coiled-coil domain containing 92		1.34305	3.95038	168.92	1.71216e-24
ENSG00000125633	CCDC93	protein_coding	Coiled-coil domain of unkwon function DUF2037	coiled-coil domain containing 93		0.488733	5.91136	145.76	2.51118e-22
ENSG00000105248	CCDC94	protein_coding	CWC16 protein	coiled-coil domain containing 94		-0.529148	4.46725	35.2047	3.05833e-08
ENSG00000173013	CCDC96	protein_coding	Domain of unknown function DUF4201	coiled-coil domain containing 96		1.64741	-0.0313004	39.6145	5.50351e-09
ENSG00000142039	CCDC97	protein_coding	Protein of unknown function DUF2052, coiled-coil	coiled-coil domain containing 97		0.132948	5.72422	3.5878	0.0606606
ENSG00000204536	CCHCR1	protein_coding	Coiled-coil alpha-helical rod protein 1	coiled-coil alpha-helical rod protein 1	COILED-COIL ALPHA-HELICAL ROD PROTEIN 1; CCHCR1;;ALPHA-HELIX COILED-COIL ROD HOMOLOG; HCR;;C6ORF18	0.546763	3.47008	29.9574	2.53236e-07
ENSG00000108691	CCL2	protein_coding	Chemokine interleukin-8-like domain	C-C motif chemokine ligand 2	CHEMOKINE, CC MOTIF, LIGAND 2; CCL2;;SMALL INDUCIBLE CYTOKINE A2; SCYA2;;MONOCYTE CHEMOTACTIC PROTEIN 1; MCP1;;MONOCYTE CHEMOTACTIC AND ACTIVATING FACTOR; MCAFCORONARY ARTERY DISEASE, MODIFIER OF, INCLUDED;;CORONARY ARTERY DISEASE, DEVELOPMENT OF, I /.../ INCLUDED	2.04125	4.9083	89.056	5.24725e-16
ENSG00000115009	CCL20	protein_coding	CC chemokine, conserved site	C-C motif chemokine ligand 20	CHEMOKINE, CC MOTIF, LIGAND 20; CCL20;;SMALL INDUCIBLE CYTOKINE SUBFAMILY A, MEMBER 20; SCYA20;;EXODUS 1;;MACROPHAGE INFLAMMATORY PROTEIN 3-ALPHA; MIP3A;;LARC	1.18897	-1.30257	6.27322	0.0136265
ENSG00000102962	CCL22	protein_coding	CC chemokine, conserved site	C-C motif chemokine ligand 22	CHEMOKINE, CC MOTIF, LIGAND 22; CCL22;;SMALL INDUCIBLE CYTOKINE SUBFAMILY A, MEMBER 22; SCYA22;;MACROPHAGE-DERIVED CHEMOKINE; MDC	3.25473	-0.0294774	104.496	6.12046e-18
ENSG00000106178	CCL24	protein_coding	Chemokine interleukin-8-like domain	C-C motif chemokine ligand 24	CHEMOKINE, CC MOTIF, LIGAND 24; CCL24;;SMALL INDUCIBLE CYTOKINE SUBFAMILY A, MEMBER 24; SCYA24;;MYELOID PROGENITOR INHIBITORY FACTOR 2; MPIF2;;EOTAXIN 2	3.03948	-1.61277	13.1249	0.000454958
ENSG00000277632	CCL3	protein_coding	CC chemokine, conserved site	C-C motif chemokine ligand 3	CHEMOKINE, CC MOTIF, LIGAND 3; CCL3;;SMALL INDUCIBLE CYTOKINE A3; SCYA3;;MACROPHAGE INFLAMMATORY PROTEIN 1-ALPHA; MIP1A;;LD78-ALPHA	-0.291266	-0.141914	0.286535	0.59346
ENSG00000276085	CCL3L3	protein_coding	CC chemokine, conserved site	C-C motif chemokine ligand 3 like 3	CHEMOKINE, CC MOTIF, LIGAND 3-LIKE 3; CCL3L3	0.595886	1.56464	1.85906	0.17538
ENSG00000275302	CCL4	protein_coding	CC chemokine, conserved site	C-C motif chemokine ligand 4	CHEMOKINE, CC MOTIF, LIGAND 4; CCL4;;SMALL INDUCIBLE CYTOKINE A4; SCYA4;;MACROPHAGE INFLAMMATORY PROTEIN 1-BETA; MIP1B;;MIP1B1;;IMMUNE ACTIVATION 2; ACT2;;AT744.1	0.503736	0.358513	1.24858	0.266117
ENSG00000276070	CCL4L2	protein_coding	Chemokine interleukin-8-like domain	C-C motif chemokine ligand 4 like 1	CHEMOKINE, CC MOTIF, LIGAND 4-LIKE 2; CCL4L2	-0.132917	1.89806	0.137535	0.711432
ENSG00000271503	CCL5	protein_coding	CC chemokine, conserved site	C-C motif chemokine ligand 5	CHEMOKINE, CC MOTIF, LIGAND 5; CCL5;;SMALL INDUCIBLE CYTOKINE A5; SCYA5;;REGULATED UPON ACTIVATION, NORMALLY T-EXPRESSED, AND PRESUMABLY SECRETED;RANTES;;T CELL-SPECIFIC RANTES;;T CELL-SPECIFIC PROTEIN p228; TCP228	0.596102	1.86169	5.30968	0.0229931
ENSG00000136280	CCM2	protein_coding	PTB/PI domain	CCM2 scaffolding protein	CCM2 GENE; CCM2;;MALCAVERNIN;;CHROMOSOME 7 OPEN READING FRAME 22; C7ORF22;;OSMOSENSING SCAFFOLD FOR MEKK3; OSM	0.606104	6.06516	82.1389	3.34946e-15
ENSG00000101331	CCM2L	protein_coding	Cerebral cavernous malformations 2	CCM2 like scaffolding protein		0.728767	-1.42547	0.992741	0.321228
ENSG00000133101	CCNA1	protein_coding	Cyclin, C-terminal domain	cyclin A1	CYCLIN A1; CCNA1	-0.391653	0.251883	1.659	0.200401
ENSG00000145386	CCNA2	protein_coding	Cyclin, C-terminal domain	cyclin A2	CYCLIN A2; CCNA2;;CYCLIN A; CCNA	-0.42957	7.53166	34.7494	3.66215e-08
ENSG00000134057	CCNB1	protein_coding	Cyclin, C-terminal domain	cyclin B1	CYCLIN B1; CCNB1;;CYCLIN B; CCNB	-0.501648	5.84562	51.7738	6.28529e-11
ENSG00000100814	CCNB1IP1	protein_coding	Zinc finger, RING-type	cyclin B1 interacting protein 1	CYCLIN B1 INTERACTING PROTEIN 1; CCNB1IP1;;HUMAN ENHANCER OF INVASION 10; HEI10;;CHROMOSOME 14 OPEN READING FRAME 18; C14ORF18HEI10/HMGIC FUSION GENE, INCLUDED	-0.661745	6.51537	70.0266	1.38988e-13
ENSG00000157456	CCNB2	protein_coding	Cyclin, C-terminal domain	cyclin B2	CYCLIN B2; CCNB2	-0.159521	6.33115	4.50898	0.0358123
ENSG00000112237	CCNC	protein_coding	Cyclin, N-terminal	cyclin C	CYCLIN C; CCNC	-0.822317	5.971	98.4073	3.18854e-17
ENSG00000110092	CCND1	protein_coding	Cyclin, C-terminal domain	cyclin D1	CYCLIN D1; CCND1;;PARATHYROID ADENOMATOSIS 1; PRAD1;;B-CELL CLL/LYMPHOMA 1; BCL1;;B-CELL LEUKEMIA 1CCND1/IGHG1 FUSION GENE, INCLUDED;;CCND1/PTH FUSION GENE, INCLUDED;;CCND1/IGLC1 FUSION GENE, INCLUDED;;CCND1/FSTL3 FUSION GENE, INCLUDED	-0.404582	5.47333	33.5107	5.99727e-08
ENSG00000118971	CCND2	protein_coding	Cyclin, C-terminal domain	cyclin D2	CYCLIN D2; CCND2	-0.800853	8.40934	216.513	1.94163e-28
ENSG00000112576	CCND3	protein_coding	Cyclin, C-terminal domain	cyclin D3	CYCLIN D3; CCND3	0.818017	7.87516	121.619	7.47395e-20
ENSG00000166946	CCNDBP1	protein_coding	Cyclin-D1-binding protein 1	cyclin D1 binding protein 1	CYCLIN D-TYPE-BINDING PROTEIN 1; CCNDBP1;;GRAP2 CYCLIN-D-INTERACTING PROTEIN; GCIP	0.980885	5.68549	327.99	8.05871e-36
ENSG00000105173	CCNE1	protein_coding	Cyclin, C-terminal domain	cyclin E1	CYCLIN E1; CCNE1;;CYCLIN E; CCNE	-0.33461	4.57396	22.6494	5.57888e-06
ENSG00000175305	CCNE2	protein_coding	Cyclin, C-terminal domain	cyclin E2	CYCLIN E2; CCNE2	1.0233	4.87412	114.485	4.49969e-19
ENSG00000162063	CCNF	protein_coding	F-box domain	cyclin F	CYCLIN F; CCNF;;F-BOX ONLY PROTEIN 1; FBXO1; FBX1	-0.125309	6.01625	2.88341	0.0921397
ENSG00000113328	CCNG1	protein_coding	Cyclin-G1	cyclin G1	CYCLIN G1; CCNG1;;CYCLIN G; CCNG	-0.0728963	6.97947	0.879051	0.350382
ENSG00000138764	CCNG2	protein_coding	Cyclin, N-terminal	cyclin G2	CYCLIN G2; CCNG2	1.77017	6.10321	235.148	9.3349e-30
ENSG00000134480	CCNH	protein_coding	Cyclin, N-terminal	cyclin H	CYCLIN H; CCNH;;CDK-ACTIVATING KINASE;;CYCLIN-DEPENDENT KINASE-ACTIVATING KINASE; CAK	-0.52921	4.25961	61.612	2.14772e-12
ENSG00000118816	CCNI	protein_coding	Cyclin, N-terminal	cyclin I		0.268829	9.99184	25.0875	1.94746e-06
ENSG00000107443	CCNJ	protein_coding	Cyclin, C-terminal domain	cyclin J		-0.361806	4.73492	30.6248	1.92635e-07
ENSG00000135083	CCNJL	protein_coding	Cyclin, C-terminal domain	cyclin J like		1.49303	-1.28668	10.5904	0.00151559
ENSG00000090061	CCNK	protein_coding	Cyclin, C-terminal domain	cyclin K	CYCLIN K; CCNK;;CYCK	-0.175219	6.49352	25.3401	1.74846e-06
ENSG00000163660	CCNL1	protein_coding	Cyclin, C-terminal domain	cyclin L1	CYCLIN L1; CCNL1;;ACTIVITY- AND NEUROTRANSMITTER-INDUCED GENE 6A; ANIA6A	0.937934	6.65116	207.821	9.21688e-28
ENSG00000221978	CCNL2	protein_coding		cyclin L2	CYCLIN L2; CCNL2	0.907159	6.68022	143.588	4.10077e-22
ENSG00000152669	CCNO	protein_coding	Cyclin-O	cyclin O	CYCLIN O; CCNO;;URACIL-DNA GLYCOSYLASE 2; UNG2; UDG2;;URACIL-DNA GLYCOSYLASE, CYCLIN-LIKE	-0.288894	0.764367	3.73998	0.0555266
ENSG00000129315	CCNT1	protein_coding	Cyclin, N-terminal	cyclin T1	CYCLIN T1; CCNT1;;CYCLIN T; CCNT;;CYCLIN C-RELATED PROTEIN;;CDK9-ASSOCIATED C-TYPE CYCLIN	-0.127509	6.92497	6.57225	0.011618
ENSG00000082258	CCNT2	protein_coding	Cyclin, N-terminal	cyclin T2	CYCLIN T2; CCNT2	0.53951	5.93458	101.434	1.39541e-17
ENSG00000224043	CCNT2-AS1	antisense				0.186791	-0.167454	0.680463	0.411097
ENSG00000108100	CCNY	protein_coding		cyclin Y	CYCLIN Y; CCNY;;CYCLIN-FOLD PROTEIN 1; CFP1;;CYCLIN X; CCNX;;CHROMOSOME 10 OPEN READING FRAME 9; C10ORF9	-0.16177	6.91754	21.6849	8.51196e-06
ENSG00000163249	CCNYL1	protein_coding	Cyclin, N-terminal	microRNA 4775		0.674485	4.78509	99.301	2.4952e-17
ENSG00000103540	CCP110	protein_coding	Centriolar coiled-coil protein of 110 kDa	centriolar coiled-coil protein 110	CENTRIOLAR COILED-COIL PROTEIN, 110-KD; CCP110;;CENTROSOMAL PROTEIN, 110-KD; CP110;;KIAA0419	-0.18693	5.56712	6.64543	0.0111751
ENSG00000260916	CCPG1	protein_coding		microRNA 628	CELL CYCLE PROGRESSION 1; CCPG1;;KIAA1254;;CELL CYCLE PROGRESSION RESTORATION 8; CPR8	1.13241	4.77597	62.1081	1.98169e-12
ENSG00000163823	CCR1	protein_coding	G protein-coupled receptor, rhodopsin-like	C-C motif chemokine receptor 1	CHEMOKINE, CC MOTIF, RECEPTOR 1; CCR1;;CMKBR1;;CKR1;;MACROPHAGE INFLAMMATORY PROTEIN 1-ALPHA/RANTES RECEPTOR;;HM145	1.72762	4.68904	419.384	1.34156e-40
ENSG00000121807	CCR2	protein_coding	G protein-coupled receptor, rhodopsin-like	C-C motif chemokine receptor 2	CHEMOKINE, CC MOTIF, RECEPTOR 2; CCR2;;CMKBR2;;CKR2;;MONOCYTE CHEMOTACTIC PROTEIN 1 RECEPTOR;;MCP1 RECEPTORCCR2A, INCLUDED; CKR2A, INCLUDED;;CCR2B, INCLUDED; CKR2B, INCLUDED	-5.44053	-1.26808	117.242	3.01446e-19
ENSG00000183625	CCR3	protein_coding	G protein-coupled receptor, rhodopsin-like	C-C motif chemokine receptor 3	CHEMOKINE, CC MOTIF, RECEPTOR 3; CCR3;;CMKBR3;;CKR3;;EOTAXIN RECEPTOR	3.08342	-0.183643	30.2438	2.25148e-07
ENSG00000179934	CCR8	protein_coding	G protein-coupled receptor, rhodopsin-like	C-C motif chemokine receptor 8	CHEMOKINE, CC MOTIF, RECEPTOR 8; CCR8;;CHEMOKINE, CC MOTIF, RECEPTOR-LIKE 2; CMKBRL2;;CHEMOKINE RECEPTOR-LIKE 1; CKRL1;;CMKBR8	-3.40389	-0.419384	14.7744	0.000257275
ENSG00000173992	CCS	protein_coding	Superoxide dismutase, copper/zinc binding domain	copper chaperone for superoxide dismutase	COPPER CHAPERONE FOR SUPEROXIDE DISMUTASE; CCS	0.944417	4.2014	123.864	4.29545e-20
ENSG00000154429	CCSAP	protein_coding	Centriole, cilia and spindle-associated protein	centriole, cilia and spindle associated protein	CENTRIOLE-, CILIA-, AND SPINDLE-ASSOCIATED PROTEIN; CCSAP;;CENTRIOLE- AND SPINDLE-ASSOCIATED PROTEIN; CSAP;;CHROMOSOME 10 OPEN READING FRAME 96; C1ORF96	0.667118	5.58376	116.371	2.78462e-19
ENSG00000107771	CCSER2	protein_coding	Serine-rich coiled-coil domain-containing protein	coiled-coil serine rich protein 2		0.988288	4.5763	136.068	2.31309e-21
ENSG00000166226	CCT2	protein_coding	Chaperonin TCP-1, conserved site	chaperonin containing TCP1 subunit 2	CHAPERONIN CONTAINING T-COMPLEX POLYPEPTIDE 1, SUBUNIT 2; CCT2;;CHAPERONIN CONTAINING TCP1, SUBUNIT 2;;CCT-BETA; CCTB	-1.21886	7.92916	429.069	4.67664e-41
ENSG00000163468	CCT3	protein_coding	Chaperonin TCP-1, conserved site	chaperonin containing TCP1 subunit 3	CHAPERONIN CONTAINING T-COMPLEX POLYPEPTIDE 1, SUBUNIT 3; CCT3;;CHAPERONIN CONTAINING TCP1, SUBUNIT 3;;CCT-GAMMA; CCTG;;TCP1 RING COMPLEX, POLYPEPTIDE 5; TRIC5	-1.28624	9.03937	1023.35	6.99679e-60
ENSG00000115484	CCT4	protein_coding	Chaperonin TCP-1, conserved site	chaperonin containing TCP1 subunit 4	CHAPERONIN CONTAINING T-COMPLEX POLYPEPTIDE 1, SUBUNIT 4; CCT4;;CHAPERONIN CONTAINING TCP1, SUBUNIT 4;;CCT-DELTA; CCTD;;STIMULATOR OF TAR RNA-BINDING PROTEINS; SRB	-1.19319	8.5177	585.951	1.62933e-47
ENSG00000150753	CCT5	protein_coding	Chaperonin TCP-1, conserved site	chaperonin containing TCP1 subunit 5	CHAPERONIN CONTAINING T-COMPLEX POLYPEPTIDE 1, SUBUNIT 5; CCT5;;CHAPERONIN CONTAINING TCP1, SUBUNIT 5;;CCT-EPSILON; CCTE;;KIAA0098	-1.15381	8.58972	710.957	1.06561e-51
ENSG00000146731	CCT6A	protein_coding	Chaperonin TCP-1, conserved site	chaperonin containing TCP1 subunit 6A	CHAPERONIN CONTAINING T-COMPLEX POLYPEPTIDE 1, SUBUNIT 6A; CCT6A;;CCT6;;T-COMPLEX HOMOLOG TCP20; TCP20;;HISTIDINE TRANSPORT REGULATOR 3; HTR3;;AMINO ACID TRANSPORT DEFECT-COMPLEMENTING	-1.11504	8.30552	402.963	8.37375e-40
ENSG00000132141	CCT6B	protein_coding	Chaperonin TCP-1, conserved site	chaperonin containing TCP1 subunit 6B	CHAPERONIN-CONTAINING T-COMPLEX POLYPEPTIDE 1, SUBUNIT 6B; CCT6B;;CHAPERONIN-CONTAINING TCP1, SUBUNIT 6B;;CCT-ZETA 2; CCTZ2	1.19721	0.740512	34.8235	3.55616e-08
ENSG00000228409	CCT6P1	transcribed_unprocessed_pseudogene				0.65655	2.59974	54.6549	2.28998e-11
ENSG00000234585	CCT6P3	transcribed_unprocessed_pseudogene				1.21074	1.24801	59.8915	3.82142e-12
ENSG00000135624	CCT7	protein_coding	Chaperonin TCP-1, conserved site	chaperonin containing TCP1 subunit 7	CHAPERONIN CONTAINING T-COMPLEX POLYPEPTIDE 1, SUBUNIT 7; CCT7;;CHAPERONIN CONTAINING TCP1, SUBUNIT 7;;CCT-ETA; CCTH	-1.13737	8.78341	555.262	2.25614e-46
ENSG00000156261	CCT8	protein_coding	Chaperonin Cpn60/TCP-1 family	chaperonin containing TCP1 subunit 8		-0.951374	8.55529	356.679	2.03104e-37
ENSG00000226015	CCT8P1	processed_pseudogene				-0.273666	-0.128393	2.03993	0.155866
ENSG00000122674	CCZ1	protein_coding	Protein of unknown function DUF1712, fungi	CCZ1 homolog, vacuolar protein trafficking and biogenesis associated		-0.677981	3.37729	70.1791	1.32418e-13
ENSG00000146574	CCZ1B	protein_coding	Protein of unknown function DUF1712, fungi	CCZ1 homolog B, vacuolar protein trafficking and biogenesis associated		-0.776921	4.72874	139.219	1.11348e-21
ENSG00000134256	CD101	protein_coding	Dihydroorotase, conserved site	CD101 molecule	IMMUNOGLOBULIN SUPERFAMILY, MEMBER 2; IGSF2;;V7;;CD101	3.05843	4.21243	220.817	9.11575e-29
ENSG00000170458	CD14	protein_coding	Leucine-rich repeat	CD14 molecule	MONOCYTE DIFFERENTIATION ANTIGEN CD14; CD14;;MYELOID CELL-SPECIFIC LEUCINE-RICH GLYCOPROTEIN	0.802983	-0.695867	0.812022	0.369632
ENSG00000177697	CD151	protein_coding	Tetraspanin	CD151 molecule (Raph blood group)	CD151 ANTIGEN; CD151;;PLATELET-ENDOTHELIAL CELL TETRASPANIN ANTIGEN 3; PETA3;;SFA1;;RED BLOOD CELL ANTIGEN MER 2; MER2	-0.400012	6.53343	29.4983	3.05901e-07
ENSG00000177575	CD163	protein_coding	SRCR domain	CD163 molecule	CD163 ANTIGEN; CD163;;HEMOGLOBIN SCAVENGER RECEPTOR	1.83347	-1.69239	3.38125	0.06892
ENSG00000135535	CD164	protein_coding	CD164-related protein	CD164 molecule	CD164 ANTIGEN; CD164;;SIALOMUCIN CD164;;ENDOLYN	0.331946	8.66353	36.7312	1.67881e-08
ENSG00000158473	CD1D	protein_coding	Immunoglobulin C1-set	CD1d molecule	THYMOCYTE ANTIGEN CD1D; CD1D	-0.397252	-1.1435	0.612568	0.435525
ENSG00000272398	CD24	protein_coding	Signal transducer CD24	CD24 molecule	CD24 ANTIGEN; CD24	1.16736	2.93884	82.1322	3.35619e-15
ENSG00000122223	CD244	protein_coding	Immunoglobulin-like domain	CD244 molecule	CD244 ANTIGEN; CD244;;NATURAL KILLER CELL RECEPTOR 2B4; 2B4;;NATURAL KILLER CELL ACTIVATION-INDUCING LIGAND; NAIL;;SLAM FAMILY, MEMBER 4; SLAMF4	1.19083	3.21507	139.132	1.13598e-21
ENSG00000198821	CD247	protein_coding	Phosphorylated immunoreceptor signalling ITAM	CD247 molecule	CD247 ANTIGEN; CD247;;CD3 ANTIGEN, ZETA SUBUNIT; CD3Z;;CD3-ZETA;;T-CELL ANTIGEN RECEPTOR COMPLEX, ZETA SUBUNIT OF CD3; TCRZ	-3.30259	1.30093	282.483	4.64538e-33
ENSG00000215039	CD27-AS1	processed_transcript				0.841195	0.557176	18.8693	2.98491e-05
ENSG00000198087	CD2AP	protein_coding	SH3 domain	CD2 associated protein	CD2-ASSOCIATED PROTEIN; CD2AP;;CAS LIGAND WITH MULTIPLE SH3 DOMAINS; CMS	-0.0392939	5.80394	0.36718	0.545713
ENSG00000169217	CD2BP2	protein_coding	GYF domain	CD2 cytoplasmic tail binding protein 2	CD2 ANTIGEN-BINDING PROTEIN 2; CD2BP2	0.195514	6.00311	14.1166	0.000268842
ENSG00000167851	CD300A	protein_coding	Immunoglobulin subtype	CD300a molecule	CD300A ANTIGEN; CD300A;;CMRF35H ANTIGEN; CMRF35H;;CMRF35H9;;IRP60	3.22719	5.33852	471.769	5.57886e-43
ENSG00000167850	CD300C	protein_coding	Immunoglobulin subtype	CD300c molecule	CD300C ANTIGEN; CD300C;;CMRF35 ANTIGEN; CMRF35;;CMRF35A;;CMRF35A1	3.85686	3.54678	267.979	4.10805e-32
ENSG00000186407	CD300E	protein_coding	Immunoglobulin subtype	CD300e molecule	CD300E ANTIGEN; CD300E;;CD300 ANTIGEN-LIKE FAMILY, MEMBER E; CD300LE;;IMMUNE RECEPTOR EXPRESSED BY MYELOID CELLS 2; IREM2;;CLM2	1.07262	0.501932	1.16674	0.282533
ENSG00000178789	CD300LB	protein_coding	Immunoglobulin subtype	CD300 molecule like family member b	CD300 ANTIGEN-LIKE FAMILY, MEMBER B; CD300LB;;CD300B;;CLM7;;TRIGGERING RECEPTOR EXPRESSED ON MYELOID CELLS 5; TREM5;;IMMUNE RECEPTOR EXPRESSED BY MYELOID CELLS 3; IREM3;;LEUKOCYTE MONOIMMUNOGLOBULIN-LIKE RECEPTOR 5; LMIR5	1.1248	4.15004	79.7619	6.82955e-15
ENSG00000204345	CD300LD	protein_coding	Immunoglobulin subtype	CD300 molecule like family member d	CD300 ANTIGEN-LIKE FAMILY, MEMBER D; CD300LD;;CD300D	2.12855	-1.35626	3.14902	0.0792221
ENSG00000186074	CD300LF	protein_coding	Immunoglobulin subtype	CD300 molecule like family member f	CD300 ANTIGEN-LIKE FAMILY, MEMBER F; CD300LF;;CD300F;;IMMUNOGLOBULIN SUPERFAMILY, MEMBER 13; IGSF13;;IMMUNE RECEPTOR EXPRESSED ON MYELOID CELLS 1; IREM1;;CLM1	0.861288	5.71082	117.096	2.31752e-19
ENSG00000241399	CD302	protein_coding	C-type lectin	CD302 molecule	CD302 ANTIGEN; CD302;;DEC205-ASSOCIATED C-TYPE LECTIN 1; DCL1;;KIAA0022	0.25526	5.47796	8.26141	0.00480714
ENSG00000167775	CD320	protein_coding		CD320 molecule	CD320 ANTIGEN; CD320;;8D6 ANTIGEN; 8D6; 8D6A;;TRANSCOBALAMIN RECEPTOR; TCBLR	-1.91075	5.73714	284.889	4.73779e-33
ENSG00000105383	CD33	protein_coding	Immunoglobulin-like domain	CD33 molecule	CD33 ANTIGEN; CD33;;MYELOID DIFFERENTIATION ANTIGEN CD33;;SIALIC ACID-BINDING IMMUNOGLOBULIN-LIKE LECTIN 3; SIGLEC3;;p67	0.116747	6.15354	3.81978	0.0530234
ENSG00000104894	CD37	protein_coding	Tetraspanin	CD37 molecule	LEUKOCYTE SURFACE ANTIGEN CD37; CD37	1.6022	7.52597	309.926	9.26117e-35
ENSG00000117877	CD3EAP	protein_coding	DNA-directed RNA polymerase I, subunit RPA34.5	CD3e molecule associated protein	CD3-EPSILON-ASSOCIATED PROTEIN; CD3EAP;;CD3 ANTIGEN, EPSILON-ASSOCIATED PROTEIN;;ANTISENSE ERCC1; ASE1;;POLYMERASE I-ASSOCIATED FACTOR, 49-KD, MOUSE, HOMOLOG OF; PAF49	-1.85529	4.91005	354.851	2.55073e-37
ENSG00000010610	CD4	protein_coding	T-cell surface antigen CD4	CD4 molecule	CD4 ANTIGEN; CD4;;T-CELL ANTIGEN T4/LEU3	1.3245	9.17223	837.415	2.47873e-55
ENSG00000117335	CD46	protein_coding	Sushi/SCR/CCP domain	CD46 molecule	CD46 ANTIGEN; CD46;;TROPHOBLAST-LYMPHOCYTE CROSS-REACTIVE ANTIGEN; TLX;;MEMBRANE COFACTOR PROTEIN; MCP;;COMPLEMENT MEMBRANE COFACTOR PROTEIN;;ANTIGEN DEFINED BY MONOCLONAL ANTIBODY TRA-2-10; MIC10	0.94722	8.22853	166.745	2.68715e-24
ENSG00000196776	CD47	protein_coding	Leukocyte surface antigen CD47	CD47 molecule		0.337164	8.26648	39.3609	6.06519e-09
ENSG00000117091	CD48	protein_coding	Immunoglobulin subtype	CD48 molecule	CD48 ANTIGEN; CD48;;B-CELL ACTIVATION MARKER; BCM1; BLAST1;;SLAM FAMILY, MEMBER 2; SLAMF2	1.28632	5.37711	202.937	2.25278e-27
ENSG00000169442	CD52	protein_coding	CAMPATH-1 antigen (CD52)	CD52 molecule	CAMPATH-1 ANTIGEN; CDW52	1.76809	1.39506	72.051	7.33145e-14
ENSG00000143119	CD53	protein_coding	Tetraspanin	CD53 molecule	LEUKOCYTE SURFACE ANTIGEN CD53; CD53;;ANTIGEN MOX44 IDENTIFIED BY MONOCLONAL ANTIBODY MRC-OX44; MOX44	1.28497	6.81075	275.841	1.24779e-32
ENSG00000196352	CD55	protein_coding	Sushi/SCR/CCP domain	CD55 molecule (Cromer blood group)	CD55 ANTIGEN; CD55;;DECAY-ACCELERATING FACTOR FOR COMPLEMENT; DAF	0.552125	6.39057	36.7161	1.68875e-08
ENSG00000116815	CD58	protein_coding	Immunoglobulin-like domain	CD58 molecule	CD58 MOLECULE; CD58;;LYMPHOCYTE FUNCTION-ASSOCIATED ANTIGEN, TYPE 3; LFA3	1.99452	4.18198	380.725	1.0989e-38
ENSG00000085063	CD59	protein_coding	Ly-6 antigen/uPA receptor-like	CD59 molecule	CD59 ANTIGEN; CD59;;PROTECTIN;;HUMAN LEUKOCYTE ANTIGEN MIC11; MIC11;;SURFACE ANTIGEN RECOGNIZED BY MONOCLONAL ANTIBODY 16.3A5	0.613491	6.87662	151.637	6.79861e-23
ENSG00000135404	CD63	protein_coding	Tetraspanin, EC2 domain	CD63 molecule	CD63 ANTIGEN; CD63;;MELANOMA-ASSOCIATED ANTIGEN MLA1; MLA1;;MELANOMA-ASSOCIATED ANTIGEN ME491;;GRANULOPHYSIN	0.188985	7.83413	15.4919	0.000140726
ENSG00000110848	CD69	protein_coding	C-type lectin	CD69 molecule	CD69 ANTIGEN; CD69;;EARLY T-CELL ACTIVATION ANTIGEN p60	1.56342	-1.23477	3.55829	0.0623879
ENSG00000137101	CD72	protein_coding	C-type lectin	CD72 molecule	CD72 ANTIGEN; CD72;;LYB2, MOUSE, HOMOLOG OF; LYB2	0.492309	-0.585282	2.78131	0.0980297
ENSG00000105369	CD79A	protein_coding	Phosphorylated immunoreceptor signalling ITAM	CD79a molecule	CD79A ANTIGEN; CD79A;;IMMUNOGLOBULIN-ASSOCIATED ALPHA; IGA;;B LYMPHOCYTE-SPECIFIC MB1 PROTEIN; MB1;;MEMBRANE-BOUND IMMUNOGLOBULIN IgM-ALPHA	0.646502	2.14589	35.3661	2.86953e-08
ENSG00000007312	CD79B	protein_coding	Phosphorylated immunoreceptor signalling ITAM	CD79b molecule	CD79B ANTIGEN; CD79B;;IMMUNOGLOBULIN-ASSOCIATED BETA; IGB;;IMMUNOGLOBULIN-ASSOCIATED B29 PROTEIN; B29	-1.93552	-1.08116	28.056	7.39902e-07
ENSG00000110651	CD81	protein_coding	Tetraspanin, EC2 domain	CD81 molecule	CD81 ANTIGEN; CD81;;TARGET OF ANTIPROLIFERATIVE ANTIBODY 1; TAPA1	-0.284176	6.53696	17.6965	5.08393e-05
ENSG00000085117	CD82	protein_coding	Tetraspanin	CD82 molecule	CD82 ANTIGEN; CD82;;KANGAI 1; KAI1;;PROSTATE CANCER ANTIMETASTASIS GENE KAI1;;LEUKOCYTE SURFACE ANTIGEN R2; SAR2;;SUPPRESSOR OF TUMORIGENICITY 6; ST6;;R2 LEUKOCYTE ANTIGEN	0.432175	5.36164	21.3762	9.75199e-06
ENSG00000112149	CD83	protein_coding	Immunoglobulin subtype	CD83 molecule	CD83 ANTIGEN; CD83;;HB15;;BL11	0.127478	4.13466	2.51461	0.115479
ENSG00000066294	CD84	protein_coding	Immunoglobulin subtype	CD84 molecule	CD84 ANTIGEN; CD84;;SLAM FAMILY, MEMBER 5; SLAMF5	-0.066355	3.84421	0.207713	0.649406
ENSG00000114013	CD86	protein_coding	Immunoglobulin-like domain	CD86 molecule	CD86 ANTIGEN; CD86;;CD28 ANTIGEN LIGAND 2; CD28LG2;;B-LYMPHOCYTE ACTIVATION ANTIGEN B7-2; LAB7-2;;B72 ANTIGEN	2.09903	5.63419	191.494	2.78298e-26
ENSG00000002586	CD99	protein_coding	CD99 antigen-like protein 2	CD99 molecule	CD99 ANTIGEN, Y CHROMOSOME;;MIC2 SURFACE ANTIGEN, Y CHROMOSOME; MIC2Y;;CELL SURFACE ANTIGEN 12E7, Y CHROMOSOME;;CELL SURFACE ANTIGEN HBA-71, Y CHROMOSOME; HBA71;;E2 ANTIGEN, Y CHROMOSOME;;CELL SURFACE ANTIGEN O13, Y CHROMOSOME	-0.00735828	6.70711	0.0260955	0.871944
ENSG00000102181	CD99L2	protein_coding		CD99 molecule like 2	CD99 ANTIGEN-LIKE 2; CD99L2;;CD99B	0.688784	5.8052	152.901	5.15254e-23
ENSG00000223773	CD99P1	transcribed_unprocessed_pseudogene				0.885173	0.955412	32.2133	1.01024e-07
ENSG00000158825	CDA	protein_coding	Cytidine and deoxycytidylate deaminases, zinc-binding	cytidine deaminase	CYTIDINE DEAMINASE; CDA	4.07391	3.82498	239.218	7.06097e-30
ENSG00000102543	CDADC1	protein_coding	Cytidine and deoxycytidylate deaminases, zinc-binding	cytidine and dCMP deaminase domain containing 1		0.168562	3.66129	4.51138	0.0357641
ENSG00000140326	CDAN1	protein_coding	Codanin-1, C-terminal domain	codanin 1	CODANIN 1; CDAN1;;DISCS LOST, DROSOPHILA, HOMOLOG OF; DLT	0.153179	5.25489	6.23892	0.013879
ENSG00000151465	CDC123	protein_coding	Cell division cycle protein 123	cell division cycle 123		-0.773385	5.83138	232.127	1.3073e-29
ENSG00000079335	CDC14A	protein_coding	Dual specificity phosphatase, catalytic domain	cell division cycle 14A	CELL DIVISION CYCLE 14, S. CEREVISIAE, HOMOLOG A; CDC14A	0.195742	4.62473	10.2051	0.00179781
ENSG00000081377	CDC14B	protein_coding	Dual specificity phosphatase, catalytic domain	cell division cycle 14B	CELL DIVISION CYCLE 14, S. CEREVISIAE, HOMOLOG B; CDC14B	3.23584	0.151686	63.1004	1.31067e-12
ENSG00000130177	CDC16	protein_coding	Tetratricopeptide-like helical domain	cell division cycle 16	CELL DIVISION CYCLE 16, S. CEREVISIAE, HOMOLOG OF; CDC16;;ANAPHASE-PROMOTING COMPLEX, SUBUNIT 6; APC6	-0.276213	6.18505	33.0436	7.23154e-08
ENSG00000117399	CDC20	protein_coding	WD40 repeat	cell division cycle 20	CELL DIVISION CYCLE 20, S. CEREVISIAE, HOMOLOG OF; CDC20;;p55CDC	-0.27972	6.73211	9.17742	0.00301258
ENSG00000231007	CDC20P1	processed_pseudogene				-0.259834	4.5766	6.37227	0.0129239
ENSG00000094880	CDC23	protein_coding	Cdc23	cell division cycle 23	CELL DIVISION CYCLE 23; CDC23;;ANAPHASE-PROMOTING COMPLEX, SUBUNIT 8; APC8;;ANAPC8	-0.475006	5.03447	78.6276	9.62477e-15
ENSG00000164045	CDC25A	protein_coding	M-phase inducer phosphatase	cell division cycle 25A	CELL DIVISION CYCLE 25A; CDC25A	-1.033	6.48787	248.952	8.1516e-31
ENSG00000101224	CDC25B	protein_coding	M-phase inducer phosphatase	cell division cycle 25B		0.78422	6.39316	69.6054	1.58919e-13
ENSG00000158402	CDC25C	protein_coding	M-phase inducer phosphatase	cell division cycle 25C	CELL DIVISION CYCLE 25C; CDC25C;;MITOSIS INDUCER CDC25; CDC25	0.670047	3.37072	57.9484	7.37783e-12
ENSG00000176386	CDC26	protein_coding	Anaphase-promoting complex, subunit CDC26	cell division cycle 26	CELL DIVISION CYCLE 26, S. CEREVISIAE, HOMOLOG OF; CDC26;;ANAPHASE-PROMOTING COMPLEX, SUBUNIT 12; ANAPC12; APC12	-0.0872818	2.40689	0.851486	0.358021
ENSG00000004897	CDC27	protein_coding	Tetratricopeptide repeat 1	cell division cycle 27	CELL DIVISION CYCLE 27; CDC27;;ANAPHASE-PROMOTING COMPLEX, SUBUNIT 3; APC3	-0.356305	6.68138	31.2552	1.48967e-07
ENSG00000099804	CDC34	protein_coding	Ubiquitin-conjugating enzyme E2	cell division cycle 34	CELL DIVISION CYCLE 34, S. CEREVISIAE, HOMOLOG OF; CDC34;;UBIQUITIN-CONJUGATING ENZYME CDC34;;UBC3; UBCH3;;UBIQUITIN-CONJUGATING ENZYME E2R 1; UBE2R1	-0.502067	5.85831	36.6573	1.72806e-08
ENSG00000105401	CDC37	protein_coding	Cdc37	microRNA 1181	CELL DIVISION CYCLE 37, S. CEREVISIAE, HOMOLOG OF; CDC37	-0.514432	7.34165	78.3253	1.05499e-14
ENSG00000106993	CDC37L1	protein_coding	Cdc37	cell division cycle 37 like 1	CDC37-LIKE 1; CDC37L1;;CELL DIVISION CYCLE 37, S. CEREVISIAE, HOMOLOG-LIKE 1; CDC37L1;;HSP90-ASSOCIATING RELATIVE OF CDC37; HARC;;FLJ20639	-0.133321	3.92607	2.67799	0.104416
ENSG00000168438	CDC40	protein_coding	WD40 repeat	cell division cycle 40	CELL DIVISION CYCLE 40, S. CEREVISIAE, HOMOLOG OF; CDC40;;PRP17, S. CEREVISIAE, HOMOLOG OF; PRP17	0.0874429	5.61486	2.30287	0.131818
ENSG00000070831	CDC42	protein_coding	Small GTPase superfamily	cell division cycle 42	CELL DIVISION CYCLE 42; CDC42;;GTP-BINDING PROTEIN, 25-KD; G25K	0.0861876	8.09496	2.74446	0.100257
ENSG00000198752	CDC42BPB	protein_coding	CRIB domain	CDC42 binding protein kinase beta	CDC42-BINDING PROTEIN KINASE, BETA; CDC42BPB;;CDC42BP-BETA;;MYOTONIC DYSTROPHY KINASE-RELATED CDC42-BINDING KINASE, BETA; MRCKB;;MRCK-BETA	-3.56846	0.119879	202.735	4.13274e-27
ENSG00000171219	CDC42BPG	protein_coding	CRIB domain	CDC42 binding protein kinase gamma	CDC42-BINDING PROTEIN KINASE, GAMMA; CDC42BPG;;MYOTONIC DYSTROPHY KINASE-RELATED CDC42-BINDING KINASE, GAMMA; MRCKG;;MRCK-GAMMA	0.0876476	-0.83606	0.0711662	0.790113
ENSG00000149798	CDC42EP2	protein_coding	CRIB domain	CDC42 effector protein 2	CDC42 EFFECTOR PROTEIN 2; CDC42EP2;;CEP2;;BINDER OF RHO GTPases 1; BORG1	1.21852	1.70209	57.1668	9.63358e-12
ENSG00000163171	CDC42EP3	protein_coding	CRIB domain	CDC42 effector protein 3	CDC42 EFFECTOR PROTEIN 3; CDC42EP3;;CEP3;;BINDER OF RHO GTPases 2; BORG2	1.98119	6.24245	304.951	1.89085e-34
ENSG00000179604	CDC42EP4	protein_coding	CRIB domain	CDC42 effector protein 4	CDC42 EFFECTOR PROTEIN 4; CDC42EP4;;CEP4;;BINDER OF RHO GTPases 4; BORG4	0.498725	4.73087	53.1603	3.85775e-11
ENSG00000237350	CDC42P6	processed_pseudogene				0.0368925	5.1564	0.232535	0.630546
ENSG00000197622	CDC42SE1	protein_coding	CRIB domain	CDC42 small effector 1		0.679924	7.67146	238.505	4.49631e-30
ENSG00000158985	CDC42SE2	protein_coding	CRIB domain	CDC42 small effector 2		0.101587	6.09738	2.41425	0.122921
ENSG00000093009	CDC45	protein_coding	CDC45 family	cell division cycle 45	CELL DIVISION CYCLE 45, S. CEREVISIAE, HOMOLOG-LIKE; CDC45L;;CDC45L2;;CDC45	-0.883105	6.12104	133.949	3.80224e-21
ENSG00000096401	CDC5L	protein_coding	SANT/Myb domain	cell division cycle 5 like	CELL DIVISION CYCLE 5, S. POMBE, HOMOLOG OF; CDC5L;;CDC5-LIKE	-0.151762	6.67575	9.28609	0.00285142
ENSG00000094804	CDC6	protein_coding	AAA+ ATPase domain	cell division cycle 6	CELL DIVISION CYCLE 6, S. CEREVISIAE, HOMOLOG OF; CDC6;;CELL DIVISION CYCLE 18, S. POMBE, HOMOLOG-LIKE; CDC18L;;CELL CYCLE CONTROLLER CDC6	-0.443718	6.18487	37.9423	1.048e-08
ENSG00000097046	CDC7	protein_coding	Protein kinase domain	cell division cycle 7	CELL DIVISION CYCLE 7, S. CEREVISIAE, HOMOLOG-LIKE 1; CDC7L1;;CDC7	-0.117803	4.95353	2.18329	0.142188
ENSG00000134371	CDC73	protein_coding	Cdc73/Parafibromin	cell division cycle 73	CELL DIVISION CYCLE PROTEIN 73, S. CEREVISIAE, HOMOLOG OF; CDC73;;PARAFIBROMIN;;HYRAX, DROSOPHILA, HOMOLOG OF; HYX;;C1ORF28;;HRPT2	0.123547	6.00438	4.29447	0.0404211
ENSG00000184661	CDCA2	protein_coding	Protein phosphatase 1 binding domain	cell division cycle associated 2		0.17633	5.79462	6.17622	0.0143534
ENSG00000111665	CDCA3	protein_coding		cell division cycle associated 3	CELL DIVISION CYCLE-ASSOCIATED PROTEIN 3; CDCA3;;TRIGGER OF MITOTIC ENTRY 1; TOME1	0.291049	4.62176	11.1314	0.00113635
ENSG00000170779	CDCA4	protein_coding	SERTA domain	cell division cycle associated 4	CELL DIVISION CYCLE-ASSOCIATED PROTEIN 4; CDCA4;;HEMATOPOIETIC PROGENITOR PROTEIN; HEPP	-0.595551	5.91056	85.3461	1.29849e-15
ENSG00000146670	CDCA5	protein_coding		cell division cycle associated 5	CELL DIVISION CYCLE-ASSOCIATED PROTEIN 5; CDCA5;;SORORIN	-0.237542	7.00882	10.3062	0.00170946
ENSG00000144354	CDCA7	protein_coding	Zinc-finger domain of monoamine-oxidase A repressor R1	cell division cycle associated 7	CELL DIVISION CYCLE-ASSOCIATED PROTEIN 7; CDCA7;;JPO1	-1.11233	7.48751	282.474	4.65126e-33
ENSG00000164649	CDCA7L	protein_coding	Zinc-finger domain of monoamine-oxidase A repressor R1	cell division cycle associated 7 like	CELL DIVISION CYCLE-ASSOCIATED PROTEIN 7-LIKE; CDCA7L;;CDCA7-LIKE;;R1;;JPO2	-0.906555	7.04407	252.255	4.79981e-31
ENSG00000134690	CDCA8	protein_coding	Borealin, N-terminal	cell division cycle associated 8	CELL DIVISION CYCLE-ASSOCIATED PROTEIN 8; CDCA8;;DASRA B;;BOREALIN	-0.125964	6.536	2.67746	0.10445
ENSG00000107736	CDH23	protein_coding	Cadherin	cadherin related 23	CADHERIN 23; CDH23;;OTOCADHERIN;;CADHERIN-RELATED FAMILY, MEMBER 23; CDHR23	2.33883	0.100596	55.6197	1.63954e-11
ENSG00000139880	CDH24	protein_coding	Cadherin, cytoplasmic domain	cadherin 24		-1.47747	6.2672	291.408	1.26328e-33
ENSG00000124215	CDH26	protein_coding	Cadherin	cadherin 26		2.69281	0.120106	30.8093	1.78649e-07
ENSG00000074276	CDHR2	protein_coding	Cadherin	cadherin related family member 2		1.82631	-1.29718	7.60341	0.00675592
ENSG00000089486	CDIP1	protein_coding	LPS-induced tumour necrosis factor alpha factor	cell death inducing p53 target 1	CHROMOSOME 16 OPEN READING FRAME 5; C16ORF5	-0.381677	5.84039	28.27	5.08874e-07
ENSG00000103502	CDIPT	protein_coding	CDP-alcohol phosphatidyltransferase	CDP-diacylglycerol--inositol 3-phosphatidyltransferase	CDP-DIACYLGLYCEROL-INOSITOL 3-PHOSPHATIDYLTRANSFERASE; CDIPT;;PHOSPHATIDYLINOSITOL SYNTHASE 1; PIS1	0.184532	6.31729	7.03039	0.00911814
ENSG00000170312	CDK1	protein_coding	Protein kinase domain	cyclin dependent kinase 1	CYCLIN-DEPENDENT KINASE 1; CDK1;;CELL DIVISION CYCLE 2, G1 TO S AND G2 TO M; CDC2;;CELL CYCLE CONTROLLER CDC2;;p34(CDC2)	0.0868976	6.93743	0.864377	0.354422
ENSG00000185324	CDK10	protein_coding	Protein kinase domain	cyclin dependent kinase 10	CYCLIN-DEPENDENT KINASE 10; CDK10;;PISSLRE	-0.148341	3.96432	2.18643	0.141904
ENSG00000008128	CDK11A	protein_coding	Protein kinase domain	cyclin dependent kinase 11A	CYCLIN-DEPENDENT KINASE 11A; CDK11A;;CELL DIVISION CYCLE 2-LIKE 2; CDC2L2;;PITSLRE A	1.70815	-0.292698	28.7497	4.16912e-07
ENSG00000248333	CDK11B	protein_coding	Protein kinase domain	cyclin dependent kinase 11B		0.0883999	5.26159	2.25023	0.136273
ENSG00000167258	CDK12	protein_coding	Protein kinase domain	cyclin dependent kinase 12	CYCLIN-DEPENDENT KINASE 12; CDK12;;CDC2-RELATED KINASE WITH AN ARGININE/SERINE-RICH DOMAIN; CRKRS;;CDC2-RELATED PROTEIN KINASE 7; CRK7;;KIAA0904	-0.240711	7.29991	38.65	7.97216e-09
ENSG00000065883	CDK13	protein_coding	Protein kinase domain	cyclin dependent kinase 13	CYCLIN-DEPENDENT KINASE 13; CDK13;;CELL DIVISION CYCLE 2-LIKE 5; CDC2L5;;CELL DIVISION CONTROLLER, CHOLINESTERASE-RELATED; CHED	0.25374	6.66217	58.9365	5.27504e-12
ENSG00000058091	CDK14	protein_coding	Protein kinase domain	cyclin dependent kinase 14	CYCLIN-DEPENDENT KINASE 14; CDK14;;PFTAIRE PROTEIN KINASE 1; PFTK1;;PFTAIRE1;;KIAA0834	0.0769371	5.03483	1.73057	0.190896
ENSG00000138395	CDK15	protein_coding		cyclin dependent kinase 15	CYCLIN-DEPENDENT KINASE 15; CDK15;;PFTAIRE PROTEIN KINASE 2; PFTAIRE2;;ALS2 CHROMOSOME REGION GENE 7; ALS2CR7	-1.9408	-0.447701	19.8763	1.97637e-05
ENSG00000102225	CDK16	protein_coding	Protein kinase domain	cyclin dependent kinase 16	CYCLIN-DEPENDENT KINASE 16; CDK16;;PCTAIRE PROTEIN KINASE 1; PCTK1;;PCTAIRE1	0.188358	6.13844	9.84677	0.00215038
ENSG00000059758	CDK17	protein_coding	Protein kinase domain	cyclin dependent kinase 17	CYCLIN-DEPENDENT KINASE 17; CDK17;;PCTAIRE PROTEIN KINASE 2; PCTK2;;PCTAIRE2	-0.0607084	5.21379	1.05485	0.306499
ENSG00000117266	CDK18	protein_coding	Protein kinase domain	cyclin dependent kinase 18	CYCLIN-DEPENDENT KINASE 18; CDK18;;PCTAIRE PROTEIN KINASE 3; PCTK3;;PCTAIRE3	2.5845	0.116362	49.6568	1.33528e-10
ENSG00000155111	CDK19	protein_coding	Protein kinase domain	cyclin dependent kinase 19	CYCLIN-DEPENDENT KINASE 19; CDK19;;KIAA1028	1.22036	6.0662	300.058	3.67386e-34
ENSG00000123374	CDK2	protein_coding	Protein kinase domain	cyclin dependent kinase 2	CYCLIN-DEPENDENT KINASE 2; CDK2;;CELL DIVISION KINASE 2;;p33(CDK2)	-0.254271	6.38962	27.4791	7.08049e-07
ENSG00000156345	CDK20	protein_coding	Protein kinase domain	cyclin dependent kinase 20	CYCLIN-DEPENDENT KINASE 20; CDK20;;CELL CYCLE-RELATED KINASE; CCRK;;CYCLIN-DEPENDENT PROTEIN KINASE H; CDCH;;p42	-0.564758	1.69547	17.1514	6.52529e-05
ENSG00000111328	CDK2AP1	protein_coding	Cyclin-dependent kinase 2-associated protein 2	cyclin dependent kinase 2 associated protein 1	CDK2-ASSOCIATED PROTEIN 1; CDK2AP1;;DELETED IN ORAL CANCER 1; DOC1	-0.187462	4.54765	8.26645	0.00479469
ENSG00000167797	CDK2AP2	protein_coding	Cyclin-dependent kinase 2-associated protein 2	cyclin dependent kinase 2 associated protein 2		0.54094	5.19871	36.3933	1.91613e-08
ENSG00000135446	CDK4	protein_coding	Protein kinase domain	cyclin dependent kinase 4	CYCLIN-DEPENDENT KINASE 4; CDK4;;CELL DIVISION KINASE 4;;PSK-J3	-1.35482	7.36417	353.326	3.08678e-37
ENSG00000164885	CDK5	protein_coding	Protein kinase domain	cyclin dependent kinase 5	CYCLIN-DEPENDENT KINASE 5; CDK5;;CELL DIVISION KINASE 5;;PSSALRE	0.153382	4.84473	7.30646	0.0078883
ENSG00000176749	CDK5R1	protein_coding	Cyclin-dependent kinase 5 activator	cyclin dependent kinase 5 regulatory subunit 1	CYCLIN-DEPENDENT KINASE 5, REGULATORY SUBUNIT 1; CDK5R1;;NEURONAL CDK5 ACTIVATOR; NCK5A;;CYCLIN-DEPENDENT KINASE 5, REGULATORY PARTNER, 35-KD; p35(NCK5A);;p35p25, INCLUDED	-0.229619	2.29798	4.31101	0.0400442
ENSG00000101391	CDK5RAP1	protein_coding	TRAM domain	CDK5 regulatory subunit associated protein 1	CDK5 REGULATORY SUBUNIT-ASSOCIATED PROTEIN 1; CDK5RAP1	-0.511347	4.77391	132.004	6.02254e-21
ENSG00000136861	CDK5RAP2	protein_coding	Centrosomin, N-terminal motif 1	CDK5 regulatory subunit associated protein 2	CDK5 REGULATORY SUBUNIT-ASSOCIATED PROTEIN 2; CDK5RAP2;;CENTROSOMAL PROTEIN, 215-KD; CEP215;;KIAA1633	0.265777	6.95802	28.0511	5.5747e-07
ENSG00000108465	CDK5RAP3	protein_coding	Protein of unknown function DUF773	CDK5 regulatory subunit associated protein 3	CDK5 REGULATORY SUBUNIT-ASSOCIATED PROTEIN 3; CDK5RAP3;;LXXLL/LEUCINE ZIPPER-CONTAINING ARF-BINDING PROTEIN; LZAP;;C53	0.507771	6.01232	47.2975	3.12971e-10
ENSG00000105810	CDK6	protein_coding	Protein kinase domain	cyclin dependent kinase 6	CYCLIN-DEPENDENT KINASE 6; CDK6;;PLSTIRECDK6/MLL FUSION GENE, INCLUDED	-1.43117	7.45473	244.545	1.66516e-30
ENSG00000134058	CDK7	protein_coding	Protein kinase domain	cyclin dependent kinase 7	CYCLIN-DEPENDENT KINASE 7; CDK7;;CELL DIVISION PROTEIN KINASE 7;;MO15, XENOPUS, HOMOLOG OF;;SERINE/THREONINE PROTEIN KINASE 1; STK1;;KINASE SUBUNIT OF CAK; CAK1	-0.549222	3.63687	60.4715	3.14473e-12
ENSG00000132964	CDK8	protein_coding	Protein kinase domain	cyclin dependent kinase 8	CYCLIN-DEPENDENT KINASE 8; CDK8;;K35	-0.935303	5.79082	546.355	4.94769e-46
ENSG00000136807	CDK9	protein_coding	Protein kinase domain	microRNA 3960	MICRO RNA 2861; MIR2861;;miRNA 2861;;MIRN2861	0.263891	6.10337	27.0139	8.60736e-07
ENSG00000145996	CDKAL1	protein_coding	TRAM domain	CDK5 regulatory subunit associated protein 1 like 1	CDK5 REGULATORY SUBUNIT-ASSOCIATED PROTEIN 1-LIKE 1; CDKAL1	-0.384292	4.4839	37.9768	1.03408e-08
ENSG00000100490	CDKL1	protein_coding	Protein kinase domain	cyclin dependent kinase like 1	CYCLIN-DEPENDENT KINASE-LIKE 1; CDKL1;;KKIALRE;;p42	-1.282	1.84876	88.1992	5.66117e-16
ENSG00000205111	CDKL4	protein_coding	Protein kinase-like domain	cyclin dependent kinase like 4		0.106861	-0.631009	0.17136	0.679679
ENSG00000008086	CDKL5	protein_coding	Protein kinase domain	cyclin dependent kinase like 5	CYCLIN-DEPENDENT KINASE-LIKE 5; CDKL5;;SERINE/THREONINE PROTEIN KINASE 9; STK9	1.35146	2.77732	79.2482	7.97544e-15
ENSG00000124762	CDKN1A	protein_coding	Cyclin-dependent kinase inhibitor	cyclin dependent kinase inhibitor 1A	CYCLIN-DEPENDENT KINASE INHIBITOR 1A; CDKN1A;;CDKN1;;CDK-INTERACTING PROTEIN 1; CIP1;;WILDTYPE p53-ACTIVATED FRAGMENT 1; WAF1;;p21	3.56004	3.7629	202.966	3.74767e-27
ENSG00000111276	CDKN1B	protein_coding	Cyclin-dependent kinase inhibitor	cyclin dependent kinase inhibitor 1B	CYCLIN-DEPENDENT KINASE INHIBITOR 1B; CDKN1B;;p27(KIP1);;KIP1	0.482698	6.37595	102.327	1.09621e-17
ENSG00000129757	CDKN1C	protein_coding	Cyclin-dependent kinase inhibitor	cyclin dependent kinase inhibitor 1C	CYCLIN-DEPENDENT KINASE INHIBITOR 1C; CDKN1C;;p57(KIP2);;KIP2	2.76297	-0.567625	19.1706	2.60577e-05
ENSG00000147889	CDKN2A	protein_coding	Ankyrin repeat-containing domain	cyclin dependent kinase inhibitor 2A	CYCLIN-DEPENDENT KINASE INHIBITOR 2A; CDKN2A;;CDKN2;;CDK4 INHIBITOR;;MULTIPLE TUMOR SUPPRESSOR 1; MTS1;;TP16;;p16(INK4);;p16(INK4A)p14(ARF), INCLUDED;;p12, INCLUDED;;p16-GAMMA, INCLUDED	-0.00484621	3.50707	0.00224285	0.962308
ENSG00000168564	CDKN2AIP	protein_coding	Double-stranded RNA-binding domain	CDKN2A interacting protein	CYCLIN-DEPENDENT KINASE INHIBITOR 2A-INTERACTING PROTEIN; CDKN2AIP;;CDKN2A-INTERACTING PROTEIN;;COLLABORATOR OF ARF; CARF	-0.36025	5.98646	62.6587	1.51688e-12
ENSG00000237190	CDKN2AIPNL	protein_coding	XRN-Two Binding Domain, XTBD	CDKN2A interacting protein N-terminal like		-0.908735	2.46333	100.939	1.59623e-17
ENSG00000147883	CDKN2B	protein_coding	Ankyrin repeat-containing domain	cyclin dependent kinase inhibitor 2B	CYCLIN-DEPENDENT KINASE INHIBITOR 2B; CDKN2B;;MULTIPLE TUMOR SUPPRESSOR 2;;MTS2;;p15(INK4B);;TP15;;CDK4B INHIBITOR	2.13241	2.58312	191.85	1.80442e-26
ENSG00000240498	CDKN2B-AS1	antisense				1.62812	-0.814964	17.8494	4.74127e-05
ENSG00000123080	CDKN2C	protein_coding	Ankyrin repeat	cyclin dependent kinase inhibitor 2C	CYCLIN-DEPENDENT KINASE INHIBITOR 2C; CDKN2C;;p18(INK4C)	0.979835	6.45466	179.619	1.95811e-25
ENSG00000129355	CDKN2D	protein_coding	Ankyrin repeat	cyclin dependent kinase inhibitor 2D	CYCLIN-DEPENDENT KINASE INHIBITOR 2D; CDKN2D;;p19(INK4D)	1.99589	4.59668	277.034	1.04364e-32
ENSG00000100526	CDKN3	protein_coding	Tyrosine specific protein phosphatases domain	cyclin dependent kinase inhibitor 3	CYCLIN-DEPENDENT KINASE INHIBITOR 3; CDKN3;;CYCLIN-DEPENDENT KINASE INTERACTOR 1; CDI1	-0.0289475	4.85176	0.152091	0.69725
ENSG00000064309	CDON	protein_coding	Immunoglobulin subtype 2	cell adhesion associated, oncogene regulated	CELL ADHESION MOLECULE-RELATED/DOWNREGULATED BY ONCOGENES; CDON;;CDO	0.0787968	1.82184	0.255958	0.613857
ENSG00000205643	CDPF1	protein_coding	Cysteine-rich domain, DPF-motif	cysteine rich DPF motif domain containing 1		-0.43597	2.12196	18.4645	3.58476e-05
ENSG00000140743	CDR2	protein_coding	Cerebellar degeneration-related protein 2	cerebellar degeneration-related protein 2	CEREBELLAR DEGENERATION-RELATED AUTOANTIGEN 2; CDR2;;CEREBELLAR DEGENERATION-RELATED AUTOANTIGEN, 62-KD; CDR62	-0.278781	4.92377	35.8087	2.4104e-08
ENSG00000109089	CDR2L	protein_coding	Cerebellar degeneration-related protein 2	cerebellar degeneration related protein 2 like		-0.622591	3.76309	44.5399	8.61175e-10
ENSG00000101290	CDS2	protein_coding	Phosphatidate cytidylyltransferase	CDP-diacylglycerol synthase 2	CDP-DIACYLGLYCEROL SYNTHASE 2; CDS2;;PHOSPHATIDATE CYTIDYLYLTRANSFERASE 2	0.651143	6.58429	295.132	7.39977e-34
ENSG00000167513	CDT1	protein_coding	Winged helix-turn-helix DNA-binding domain	chromatin licensing and DNA replication factor 1	CHROMATIN LICENSING AND DNA REPLICATION FACTOR 1; CDT1;;DOUBLE PARKED, DROSOPHILA, HOMOLOG OF; DUP	-0.622565	6.7538	21.435	9.84668e-06
ENSG00000091527	CDV3	protein_coding	Protein CDV3	CDV3 homolog		-0.598036	8.5036	193.074	1.42884e-26
ENSG00000153046	CDYL	protein_coding	Chromo/chromo shadow domain	chromodomain Y-like	CHROMODOMAIN PROTEIN ON Y CHROMOSOME-LIKE; CDYL	-0.161514	5.86015	18.692	3.23389e-05
ENSG00000166446	CDYL2	protein_coding	Chromo/chromo shadow domain	chromodomain Y-like 2		3.3814	-1.53197	45.31	7.57867e-10
ENSG00000079385	CEACAM1	protein_coding	Immunoglobulin subtype 2	carcinoembryonic antigen related cell adhesion molecule 1	CARCINOEMBRYONIC ANTIGEN-RELATED CELL ADHESION MOLECULE 1; CEACAM1;;BILIARY GLYCOPROTEIN; BGP;;BILIARY GLYCOPROTEIN 1; BGP1;;CD66 ANTIGEN; CD66CARCINOEMBRYONIC ANTIGEN-RELATED CELL ADHESION MOLECULE PSEUDOGENES,INCLUDED;;CEACAMPS, INCLUDED	1.02426	-1.14755	4.45875	0.0369534
ENSG00000186567	CEACAM19	protein_coding		carcinoembryonic antigen related cell adhesion molecule 19	CARCINOEMBRYONIC ANTIGEN-LIKE 1; CEAL1	2.20217	0.316362	40.4674	3.97384e-09
ENSG00000007129	CEACAM21	protein_coding	Immunoglobulin subtype 2	carcinoembryonic antigen related cell adhesion molecule 21		0.088437	-0.701524	0.0544596	0.815883
ENSG00000105352	CEACAM4	protein_coding	Immunoglobulin-like domain	carcinoembryonic antigen related cell adhesion molecule 4		4.17104	-0.326624	45.6838	6.61791e-10
ENSG00000086548	CEACAM6	protein_coding		carcinoembryonic antigen related cell adhesion molecule 6	CARCINOEMBRYONIC ANTIGEN-RELATED CELL ADHESION MOLECULE 6; CEACAM6;;NONSPECIFIC CROSSREACTING ANTIGEN; NCA;;NORMAL CROSSREACTING ANTIGEN;;CEA-LIKE PROTEIN; CEAL	-1.69566	-0.718534	32.7225	8.22756e-08
ENSG00000245848	CEBPA	protein_coding	Basic-leucine zipper domain	CCAAT/enhancer binding protein alpha	CCAAT/ENHANCER-BINDING PROTEIN, ALPHA; CEBPA;;C/EBP-ALPHA;;CEBP	-0.777591	8.08892	107.566	2.71009e-18
ENSG00000267296	CEBPA-AS1	antisense				0.0021486	2.26301	0.00034114	0.985295
ENSG00000172216	CEBPB	protein_coding	Basic-leucine zipper domain	CCAAT/enhancer binding protein beta	CCAAT/ENHANCER-BINDING PROTEIN, BETA; CEBPB;;C/EBP-BETA;;INTERLEUKIN 6-DEPENDENT DNA-BINDING PROTEIN; IL6DBP;;LIVER ACTIVATOR PROTEIN; LAP;;LIVER-ENRICHED TRANSCRIPTIONAL ACTIVATOR PROTEIN;;TRANSCRIPTION FACTOR 5; TCF5;;NFIL6	0.95264	6.16391	46.8857	4.02375e-10
ENSG00000221869	CEBPD	protein_coding	Basic-leucine zipper domain	CCAAT/enhancer binding protein delta	CCAAT/ENHANCER-BINDING PROTEIN, DELTA; CEBPD;;C/EBP-DELTA;;CRP3	0.662058	6.01441	27.9269	6.0123e-07
ENSG00000092067	CEBPE	protein_coding	Basic-leucine zipper domain	CCAAT/enhancer binding protein epsilon	CCAAT/ENHANCER-BINDING PROTEIN, EPSILON; CEBPE;;C/EBP-EPSILON;;CRP1	0.301079	7.61886	9.87613	0.00212085
ENSG00000153879	CEBPG	protein_coding	Basic-leucine zipper domain	CCAAT/enhancer binding protein gamma	CCAAT/ENHANCER-BINDING PROTEIN, GAMMA; CEBPG;;C/EBP-GAMMA;;GRANULOCYTE COLONY-STIMULATING FACTOR PROMOTER ELEMENT 1-BINDING PROTEIN;GPE1BP;;GPE1-BINDING PROTEIN	-0.247076	6.85522	19.5911	2.15713e-05
ENSG00000115816	CEBPZ	protein_coding	CCAAT-binding factor	CCAAT/enhancer binding protein zeta	CCAAT/ENHANCER-BINDING PROTEIN, ZETA; CEBPZ;;CBF;;NUCLEOLAR COMPLEX-ASSOCIATED PROTEIN 1, S. CEREVISIAE, HOMOLOG OF;NOC1	-0.973693	6.74474	195.767	8.57914e-27
ENSG00000218739	CEBPZOS	protein_coding		CEBPZ opposite strand		-0.00666379	4.91826	0.00661302	0.935325
ENSG00000099954	CECR2	protein_coding	Bromodomain	CECR2, histone acetyl-lysine reader	CAT EYE SYNDROME CHROMOSOME REGION, CANDIDATE 2; CECR2;;KIAA1740	3.54676	-0.406114	47.5548	2.85031e-10
ENSG00000069998	CECR5	protein_coding	HAD-superfamily hydrolase, subfamily IIA, CECR5	cat eye syndrome chromosome region, candidate 5		-0.921967	6.12467	190.848	2.18579e-26
ENSG00000183307	CECR6	protein_coding	Cat eye syndrome critical region protein 6	cat eye syndrome chromosome region, candidate 6		0.592386	-0.143606	5.29518	0.0231449
ENSG00000237438	CECR7	transcribed_unprocessed_pseudogene				-0.143612	0.813204	0.143254	0.705827
ENSG00000170835	CEL	protein_coding	Carboxylesterase, type B	carboxyl ester lipase	CARBOXYL-ESTER LIPASE; CEL;;CARBOXYL-ESTER HYDROLASE;;CHOLESTEROL ESTERASE;;LYSOPHOSPHOLIPASE;;BILE SALT-STIMULATED LIPASE; BSSL;;BILE SALT-DEPENDENT LIPASE; BSDLBILE SALT-DEPENDENT LIPASE, ONCOFETAL ISOFORM, INCLUDED;;FETOACINAR PANCREATIC PROTEIN, /.../DED; FAPP, INCLUDED; FAP,INCLUDED;;CARBOXYL-ESTER LIPASE-LIKE, INCLUDED; CELL, INCLUDED	1.11874	1.05082	44.4595	8.87207e-10
ENSG00000149187	CELF1	protein_coding	RNA recognition motif domain	CUGBP, Elav-like family member 1		-0.287147	7.30849	49.5165	1.40416e-10
ENSG00000048740	CELF2	protein_coding	RNA recognition motif domain	CUGBP, Elav-like family member 2		-0.100242	7.229	4.65771	0.0329462
ENSG00000181800	CELF2-AS1	antisense				-0.927265	-1.02407	7.97696	0.00556622
ENSG00000075275	CELSR1	protein_coding	EGF-type aspartate/asparagine hydroxylation site	cadherin EGF LAG seven-pass G-type receptor 1	CADHERIN EGF LAG SEVEN-PASS G-TYPE RECEPTOR 1; CELSR1;;FLAMINGO, DROSOPHILA, HOMOLOG OF, 2; FMI2	0.319744	5.21941	12.8747	0.000486576
ENSG00000143126	CELSR2	protein_coding	EGF-type aspartate/asparagine hydroxylation site	cadherin EGF LAG seven-pass G-type receptor 2	CADHERIN EGF LAG SEVEN-PASS G-TYPE RECEPTOR 2; CELSR2;;EPIDERMAL GROWTH FACTOR-LIKE 2; EGFL2;;MULTIPLE EPIDERMAL GROWTH FACTOR-LIKE DOMAINS 3; MEGF3	0.466217	4.4991	21.9735	7.49834e-06
ENSG00000008300	CELSR3	protein_coding	GPS motif	microRNA 4793	CADHERIN EGF LAG SEVEN-PASS G-TYPE RECEPTOR 3; CELSR3;;EPIDERMAL GROWTH FACTOR-LIKE 1; EGFL1;;MULTIPLE EPIDERMAL GROWTH FACTOR-LIKE DOMAINS 2; MEGF2;;FLAMINGO, DROSOPHILA, HOMOLOG OF, 1; FMI1	1.11443	5.07736	126.875	2.06098e-20
ENSG00000115163	CENPA	protein_coding	Histone H3/CENP-A	centromere protein A	CENTROMERIC PROTEIN A; CENPA	-0.171319	4.69203	5.14243	0.0251729
ENSG00000125817	CENPB	protein_coding	DDE superfamily endonuclease domain	centromere protein B	CENTROMERIC PROTEIN B; CENPB	-0.107519	6.57055	2.08152	0.151748
ENSG00000177946	CENPBD1	protein_coding	HTH CenpB-type DNA-binding domain	CENPB DNA-binding domain containing 1		0.297483	2.20895	6.76341	0.0104978
ENSG00000213753	CENPBD1P1	transcribed_processed_pseudogene				-0.177706	4.63232	8.2191	0.00491289
ENSG00000145241	CENPC	protein_coding	RmlC-like cupin domain	centromere protein C	CENTROMERIC PROTEIN C1; CENPC1CENTROMERIC PROTEIN C1 PSEUDOGENE, INCLUDED; CENPC2, INCLUDED	0.316774	5.27066	21.295	1.01078e-05
ENSG00000226982	CENPCP1	processed_pseudogene				0.13778	1.64161	1.27643	0.260862
ENSG00000138778	CENPE	protein_coding	Kinesin motor domain	centromere protein E	CENTROMERIC PROTEIN E; CENPE;;KINESIN FAMILY MEMBER 10; KIF10	0.809392	6.60231	67.3785	3.29809e-13
ENSG00000117724	CENPF	protein_coding	Kinetochore protein Cenp-F/LEK1, Rb protein-binding domain	centromere protein F	CENTROMERIC PROTEIN F; CENPF;;MITOSIN	0.405668	7.96581	22.1673	6.88749e-06
ENSG00000153044	CENPH	protein_coding	Centromere protein H	centromere protein H	CENTROMERIC PROTEIN H; CENPH	-0.6518	3.96923	59.6452	4.15205e-12
ENSG00000102384	CENPI	protein_coding	Centromere protein I	centromere protein I	CENTROMERIC PROTEIN I; CENPI;;FSH PRIMARY RESPONSE, RAT, HOMOLOG OF, 1; FSHPRH1;;LEUCINE-RICH PRIMARY RESPONSE GENE 1; LRPR1;;MIS6	1.0666	4.47493	152.849	5.21113e-23
ENSG00000151849	CENPJ	protein_coding	T-complex protein 10, C-terminal domain	centromere protein J	CENTROMERIC PROTEIN J; CENPJ;;CENTROSOMAL P4.1-ASSOCIATED PROTEIN; CPAP	-0.103854	5.2278	2.44912	0.120277
ENSG00000123219	CENPK	protein_coding	Centromere protein Cenp-K	centromere protein K		0.0294688	3.41333	0.0760705	0.783179
ENSG00000120334	CENPL	protein_coding	Centromere subunit L	centromere protein L	CENTROMERIC PROTEIN L; CENPL	-0.141393	4.40488	3.65006	0.058501
ENSG00000100162	CENPM	protein_coding	Centromere protein Cenp-M	centromere protein M	CENTROMERIC PROTEIN M; CENPM;;PROLIFERATION-ASSOCIATED NUCLEAR ELEMENT 1; PANE1	-0.386978	4.81547	16.1823	0.000102048
ENSG00000166451	CENPN	protein_coding	Centromere protein Chl4/mis15/CENP-N	centromere protein N	CENTROMERIC PROTEIN N; CENPN	0.26497	5.57753	13.047	0.000447887
ENSG00000138092	CENPO	protein_coding	Centromere protein O	centromere protein O	CENTROMERIC PROTEIN O; CENPO	-0.248116	5.84348	13.376	0.000382561
ENSG00000188312	CENPP	protein_coding	Centromere protein P	centromere protein P	CENTROMERIC PROTEIN P; CENPP	-0.2484	4.63805	15.9972	0.000111208
ENSG00000031691	CENPQ	protein_coding	Centromere protein Q	centromere protein Q	CENTROMERIC PROTEIN Q; CENPQ	-0.216543	4.69529	7.14307	0.00859371
ENSG00000175279	CENPS	protein_coding	Histone-fold	centromere protein S	APOPTOSIS-INDUCING, TAF9-LIKE DOMAIN 1; APITD1;;CENTROMERIC PROTEIN S; CENPS;;FANCM-INTERACTING HISTONE-FOLD PROTEIN 1; MHF1	-0.608657	1.47356	18.9966	2.81826e-05
ENSG00000102901	CENPT	protein_coding	Histone-fold	centromere protein T	CENTROMERIC PROTEIN T; CENPT	0.0917807	4.75131	0.972637	0.326047
ENSG00000151725	CENPU	protein_coding	Centromere protein U	centromere protein U	MLF1-INTERACTING PROTEIN; MLF1IP;;CENTROMERIC PROTEIN U; CENPU;;CENP50	-0.470048	6.65011	29.4188	3.16101e-07
ENSG00000166582	CENPV	protein_coding	Glutathione-dependent formaldehyde-activating enzyme/centromere protein V	centromere protein V	CENTROMERE PROTEIN V; CENPV;;NUCLEAR PROTEIN p30	-1.50755	4.32583	286.192	2.6944e-33
ENSG00000203760	CENPW	protein_coding	Centromere protein W	centromere protein W	CENTROMERIC PROTEIN W; CENPW;;CHROMOSOME 6 OPEN READING FRAME 173; C6ORF173;;CANCER-UPREGULATED GENE 2; CUG2	-0.757121	3.86521	92.8804	1.48703e-16
ENSG00000169689	CENPX	protein_coding	Centromere protein X	centromere protein X	STIMULATED BY RETINOIC ACID 13; STRA13;;CENTROMERIC PROTEIN X; CENPX;;FANCONI ANEMIA-ASSOCIATED POLYPEPTIDE, 10-KD; FAAP10;;FANCM-INTERACTING HISTONE-FOLD PROTEIN 2; MHF2;;RETINOIC ACID-INDUCIBLE GENE D9; D9	-0.856705	4.92577	83.068	2.54134e-15
ENSG00000116198	CEP104	protein_coding	Galactose-binding domain-like	centrosomal protein 104	CENTROSOMAL PROTEIN, 104-KD; CEP104;;GLYCINE-, GLUTAMATE-, AND THIENYLCYCLOHEXYLPIPERIDINE-BINDING PROTEIN;GLYBP;;FAP256, CHLAMYDOMONAS, HOMOLOG OF;;KIAA0562	0.330143	5.65871	41.1089	3.11438e-09
ENSG00000168944	CEP120	protein_coding	C2 domain	centrosomal protein 120	CENTROSOMAL PROTEIN, 120-KD; CEP120;;COILED-COIL DOMAIN-CONTAINING PROTEIN 100; CCDC100	-0.248835	4.75764	12.0369	0.000729705
ENSG00000100629	CEP128	protein_coding	Centrosomal protein of 128kDa	centrosomal protein 128		0.338799	3.44734	18.1592	4.11759e-05
ENSG00000141577	CEP131	protein_coding	Centrosomal protein of 131 kDa	centrosomal protein 131	5-@AZACYTIDINE-INDUCED GENE 1, MOUSE, HOMOLOG OF; AZI1;;AZ1, MOUSE, HOMOLOG OF; AZ1;;KIAA1118	0.235357	4.92677	6.21985	0.0140216
ENSG00000174799	CEP135	protein_coding	Centrosomal protein of 135kDa	centrosomal protein 135	CENTROSOMAL PROTEIN, 135-KD; CEP135;;KIAA0635	0.238872	4.80921	10.3068	0.00170895
ENSG00000103995	CEP152	protein_coding	Centrosomal protein of 152kDa	centrosomal protein 152	CENTROSOMAL PROTEIN, 152-KD; CEP152;;KIAA0912	0.021581	5.34661	0.0931734	0.76072
ENSG00000135315	CEP162	protein_coding		centrosomal protein 162	CENTROSOMAL PROTEIN, 162-KD; CEP162;;KIAA1009;;QN1	-0.151083	2.90469	2.41529	0.122841
ENSG00000110274	CEP164	protein_coding	WW domain	centrosomal protein 164	CENTROSOMAL PROTEIN, 164-KD; CEP164;;KIAA1052	0.334232	5.19863	28.6236	4.39295e-07
ENSG00000143702	CEP170	protein_coding	Forkhead-associated (FHA) domain	centrosomal protein 170 pseudogene 1	CENTROSOMAL PROTEIN, 170-KD; CEP170;;KIAA0470	0.141877	6.65946	7.5384	0.00698851
ENSG00000154608	CEP170P1	transcribed_unprocessed_pseudogene				-0.304712	-0.640764	1.19815	0.275927
ENSG00000174007	CEP19	protein_coding	Centrosomal protein of 19kDa	centrosomal protein 19	CENTROSOMAL PROTEIN, 19-KD; CEP19;;CHROMOSOME 3 OPEN READING FRAME 34; C3ORF34	0.613593	2.56072	34.3578	4.27806e-08
ENSG00000101639	CEP192	protein_coding	Centrosomal protein of 192kDa	centrosomal protein 192	CENTROSOMAL PROTEIN, 192-KD; CEP192;;PROTEIN PHOSPHATASE 1, REGULATORY SUBUNIT 62; PPP1R62;;KIAA1569	0.385069	6.6324	71.6344	8.3581e-14
ENSG00000126001	CEP250	protein_coding	Centrosome-associated protein CEP250	centrosomal protein 250	CENTROSOMAL PROTEIN 2; CEP2;;CENTROSOMAL PROTEIN, 250-KD; CEP250;;CENTROSOMAL NEK2-ASSOCIATED PROTEIN 1; CNAP1	0.659246	5.71051	95.2589	7.6271e-17
ENSG00000198707	CEP290	protein_coding	Centrosomal protein of 290kDa	centrosomal protein 290	CENTROSOMAL PROTEIN, 290-KD; CEP290;;ANTIGEN IDENTIFIED BY MONOCLONAL ANTIBODY 3H11; 3H11AG;;KIAA0373;;NEPHROCYSTIN 6; NPHP6;;BBS14 GENE; BBS14	0.0500476	4.2718	0.325478	0.569422
ENSG00000166004	CEP295	protein_coding	ALMS motif	centrosomal protein 295		0.774452	5.255	122.205	6.46365e-20
ENSG00000135837	CEP350	protein_coding	CAP Gly-rich domain	centrosomal protein 350		0.508363	7.4505	67.8221	2.81221e-13
ENSG00000106477	CEP41	protein_coding	Rhodanese-like domain	centrosomal protein 41	CENTROSOMAL PROTEIN, 41-KD; CEP41;;TESTIS-SPECIFIC PROTEIN A14 TESTIS-SPECIFIC PROTEIN 14, FORMERLY;TSGA14, FORMERLY	-0.847234	4.08736	287.229	2.31603e-33
ENSG00000164118	CEP44	protein_coding	Centrosomal CEP44 domain	centrosomal protein 44		0.301795	4.78399	13.8315	0.000307836
ENSG00000138180	CEP55	protein_coding	TSG101 and ALIX binding domain of CEP55	centrosomal protein 55	CENTROSOMAL PROTEIN, 55-KD; CEP55	0.596697	5.42484	58.4721	6.17452e-12
ENSG00000166037	CEP57	protein_coding	Centrosomal protein 57kDa	centrosomal protein 57	CENTROSOMAL PROTEIN, 57-KD; CEP57;;PROLIFERATION-INDUCING GENE 8; PIG8;;TESTES-SPECIFIC PROTEIN 57; TSP57;;TRANSLOKIN;;KIAA0092	-0.199035	7.01822	9.99365	0.00199794
ENSG00000183137	CEP57L1	protein_coding	Centrosomal protein 57kDa	centrosomal protein 57 like 1		0.210467	3.45517	5.33651	0.0226263
ENSG00000182923	CEP63	protein_coding	Centrosomal protein Cep63/Deup1, N-terminal	centrosomal protein 63		0.24586	5.17759	21.391	9.68864e-06
ENSG00000011523	CEP68	protein_coding	A-kinase anchor protein 6/Centrosomal protein of 68kDa	centrosomal protein 68	CENTROSOMAL PROTEIN, 68-KD; CEP68;;KIAA0582	-0.56005	4.84391	105.312	4.92397e-18
ENSG00000112877	CEP72	protein_coding	Leucine-rich repeat	centrosomal protein 72	CENTROSOMAL PROTEIN, 72-KD; CEP72;;KIAA1519	-0.163281	4.0009	4.32162	0.0398045
ENSG00000101624	CEP76	protein_coding		centrosomal protein 76		-0.456603	4.71679	52.0437	5.71365e-11
ENSG00000148019	CEP78	protein_coding	Leucine-rich repeat	centrosomal protein 78	CENTROSOMAL PROTEIN, 78-KD; CEP78	0.0591704	4.75616	0.59926	0.440413
ENSG00000173588	CEP83	protein_coding	Centrosomal protein of 83kDa	centrosomal protein 83	CENTROSOMAL PROTEIN, 83-KD; CEP83;;COILED-COIL DOMAIN-CONTAINING PROTEIN 41; CCDC41;;RENAL CARCINOMA ANTIGEN NY-REN-58	-0.39996	4.13971	26.6143	1.01851e-06
ENSG00000130695	CEP85	protein_coding	Centrosomal protein of 85kDa	centrosomal protein 85		0.0325909	6.95736	0.861061	0.355342
ENSG00000111860	CEP85L	protein_coding	Centrosomal protein of 85kDa-like	centrosomal protein 85 like		0.229903	2.40772	2.25915	0.135506
ENSG00000121289	CEP89	protein_coding		centrosomal protein 89	CENTROSOMAL PROTEIN, 89-KD; CEP89;;COILED-COIL DOMAIN-CONTAINING PROTEIN 123; CCDC123;;CENTROSOMAL PROTEIN 123; CEP123;;FLJ14640	0.305107	3.04562	16.8275	7.57344e-05
ENSG00000258890	CEP95	protein_coding	Calponin homology domain	centrosomal protein 95		-0.179784	4.76579	7.9009	0.00578951
ENSG00000182504	CEP97	protein_coding	IQ motif, EF-hand binding site	centrosomal protein 97	CENTROSOMAL PROTEIN, 97-KD; CEP97	0.436103	4.20118	30.7839	1.8051e-07
ENSG00000134255	CEPT1	protein_coding	CDP-alcohol phosphatidyltransferase	choline/ethanolamine phosphotransferase 1		-0.0362889	5.76235	0.267629	0.605898
ENSG00000167123	CERCAM	protein_coding		cerebral endothelial cell adhesion molecule	CEREBRAL ENDOTHELIAL CELL ADHESION MOLECULE; CERCAM	0.449835	4.79853	23.7553	3.45169e-06
ENSG00000100422	CERK	protein_coding	Diacylglycerol kinase, catalytic domain	ceramide kinase	CERAMIDE KINASE; CERK;;KIAA1646	0.381264	6.52799	81.9162	3.57933e-15
ENSG00000223802	CERS1	protein_coding	TRAM/LAG1/CLN8 homology domain	ceramide synthase 1	CERAMIDE SYNTHASE 1; CERS1;;LAG1, S. CEREVISIAE, HOMOLOG OF, 1; LASS1;;UPSTREAM OF GDF1; UOG1	-2.61234	1.40648	249.942	6.9514e-31
ENSG00000143418	CERS2	protein_coding	TRAM/LAG1/CLN8 homology domain	ceramide synthase 2	CERAMIDE SYNTHASE 2; CERS2;;LAG1, S. CEREVISIAE, HOMOLOG OF, 2; LASS2	-0.361364	8.95587	138.306	1.37478e-21
ENSG00000090661	CERS4	protein_coding	Ceramide synthase component Lag1/Lac1	ceramide synthase 4	CERAMIDE SYNTHASE 4; CERS4;;LAG1, S. CEREVISIAE, HOMOLOG OF, 4; LASS4;;TRAM HOMOLOG 1; TRH1	0.183515	3.95366	3.51592	0.0632613
ENSG00000139624	CERS5	protein_coding	Homeobox domain	ceramide synthase 5	CERAMIDE SYNTHASE 5; CERS5;;LAG1, S. CEREVISIAE, HOMOLOG OF, 5; LASS5;;TRAM HOMOLOG 4; TRH4	0.259163	5.257	33.0894	7.1e-08
ENSG00000172292	CERS6	protein_coding	Homeobox domain	ceramide synthase 6	CERAMIDE SYNTHASE 6; CERS6;;LAG1, S. CEREVISIAE, HOMOLOG OF, 6; LASS6	-0.147996	7.6992	7.02826	0.00912838
ENSG00000198848	CES1	protein_coding		carboxylesterase 1	CARBOXYLESTERASE 1; CES1;;SERINE ESTERASE 1; SES1;;CARBOXYLESTERASE, LIVER;;TRIACYLGLYCEROL HYDROLASE; TGH;;CARBOXYLESTERASE 2, FORMERLY; CES2, FORMERLY;;CHOLESTEROL ESTER HYDROLASE, NEUTRAL, MACROPHAGE-DERIVED; CEHMONOCYTE ESTERASE DEFICIENCY, INCL /.../MONOCYTE CARBOXYLESTERASE DEFICIENCY, INCLUDED;;CARBOXYLESTERASE 1 DEFICIENCY, INCLUDED	1.57549	1.84931	39.2813	6.25472e-09
ENSG00000172831	CES2	protein_coding	Carboxylesterase, type B	carboxylesterase 2	CARBOXYLESTERASE 2; CES2	-0.148768	6.22943	5.37531	0.0221505
ENSG00000172828	CES3	protein_coding	Carboxylesterase, type B	carboxylesterase 3	CARBOXYLESTERASE 3; CES3;;ES31, MOUSE, HOMOLOG OF;;CES1D, MOUSE, HOMOLOG OF	1.04831	4.0106	105.231	5.03114e-18
ENSG00000147400	CETN2	protein_coding	ATP-dependent RNA helicase DEAD-box, conserved site	centrin 2	CENTRIN, EF-HAND PROTEIN, 2; CETN2;;CALTRACTIN; CALT	0.129892	4.35761	1.95549	0.164626
ENSG00000153140	CETN3	protein_coding	EF-hand domain	centrin 3	CENTRIN 3; CETN3;;CDC31, S. CEREVISIAE, HOMOLOG OF	-0.0524464	2.97891	0.20212	0.653842
ENSG00000087237	CETP	protein_coding	Lipid-binding serum glycoprotein, C-terminal	cholesteryl ester transfer protein	CHOLESTERYL ESTER TRANSFER PROTEIN, PLASMA; CETP;;LIPID TRANSFER PROTEIN I	0.673382	-0.818401	4.30691	0.0401373
ENSG00000070761	CFAP20	protein_coding	Cilia/flagella-associated protein 20/WDR90/C3orf67	cilia and flagella associated protein 20		-0.590951	5.71392	181.633	1.31361e-25
[truncated: 11,114 more rows]

## Sheet: Cont.7Vs0
Geneid	gene_name	biotype	interpro_description	wikigene_description	mim_gene_description	logFC	logCPM	F	PValue
ENSG00000268895	A1BG-AS1	antisense				1.23466	0.475101	9.09733	0.00317012
ENSG00000094914	AAAS	protein_coding	WD40 repeat	aladin WD repeat nucleoporin	AAAS GENE; AAAS;;ALADIN;;ADRACALIN	-1.05273	5.71715	328.886	7.15754e-36
ENSG00000081760	AACS	protein_coding	AMP-dependent synthetase/ligase	acetoacetyl-CoA synthetase	ACETOACETYL-CoA SYNTHETASE; AACS;;ACYL-CoA SYNTHETASE FAMILY, MEMBER 1; ACSF1	0.656601	5.51198	163.079	5.79105e-24
ENSG00000158122	AAED1	protein_coding	Peroxiredoxin-like FAM213/AAED1	AhpC/TSA antioxidant enzyme domain containing 1		-0.20156	3.52397	6.61088	0.011382
ENSG00000103591	AAGAB	protein_coding	Alpha/gamma-adaptin-binding protein p34	alpha- and gamma-adaptin binding protein	ALPHA- AND GAMMA-ADAPTIN-BINDING PROTEIN; AAGAB;;p34	-0.365075	6.21674	59.0448	5.08534e-12
ENSG00000115977	AAK1	protein_coding	BMP-2-inducible protein kinase, C-terminal	AP2 associated kinase 1	ADAPTOR PROTEIN 2-ASSOCIATED KINASE 1; AAK1;;AP2-ASSOCIATED KINASE 1;;KIAA1048	0.720517	5.53962	76.6994	1.73271e-14
ENSG00000087884	AAMDC	protein_coding	NDUFAF3/Mth938 domain-containing protein	adipogenesis associated Mth938 domain containing		0.504831	1.89728	19.6012	2.14738e-05
ENSG00000127837	AAMP	protein_coding	WD40 repeat	angio associated migratory cell protein	ANGIO-ASSOCIATED MIGRATORY CELL PROTEIN; AAMP	-0.372024	6.65875	44.4639	8.85767e-10
ENSG00000131043	AAR2	protein_coding	A1 cistron-splicing factor, AAR2	AAR2 splicing factor homolog		-0.64749	5.58103	165.997	3.14091e-24
ENSG00000090861	AARS	protein_coding	Alanine-tRNA ligase, class IIc	alanyl-tRNA synthetase	ALANYL-tRNA SYNTHETASE; AARS;;ALARS	-0.655332	8.7104	119.346	1.31615e-19
ENSG00000124608	AARS2	protein_coding	Alanine-tRNA ligase, class IIc	alanyl-tRNA synthetase 2, mitochondrial	ALANYL-tRNA SYNTHETASE 2; AARS2;;ALANYL-tRNA SYNTHETASE, MITOCHONDRIAL;;MT-ALARS;;KIAA1270	-0.951547	5.3068	165.992	3.14397e-24
ENSG00000157426	AASDH	protein_coding	AMP-dependent synthetase/ligase	aminoadipate-semialdehyde dehydrogenase	AMINOADIPATE-SEMIALDEHYDE DEHYDROGENASE; AASDH;;ACYL-CoA SYNTHETASE FAMILY, MEMBER 4; ACSF4	-0.175964	4.82145	6.59741	0.0114637
ENSG00000149313	AASDHPPT	protein_coding	Phosphopantetheine-protein transferase domain	aminoadipate-semialdehyde dehydrogenase-phosphopantetheinyl transferase	ALPHA-AMINOADIPATE SEMIALDEHYDE DEHYDROGENASE-PHOSPHOPANTETHEINYLTRANSFERASE; AASDHPPT;;AASDPPT;;LYS5, S. CEREVISIAE, HOMOLOG OF;;CGI-80;;DKFZP566E2346	-1.02926	5.53161	221.882	7.57118e-29
ENSG00000215458	AATBC	antisense				4.44628	-1.38928	38.2232	1.29494e-08
ENSG00000275700	AATF	protein_coding	Apoptosis-antagonizing transcription factor, C-terminal	apoptosis antagonizing transcription factor	APOPTOSIS-ANTAGONIZING TRANSCRIPTION FACTOR; AATF;;CHE1	-0.731961	6.71482	368.778	4.59734e-38
ENSG00000181409	AATK	protein_coding	Protein kinase domain	apoptosis associated tyrosine kinase		7.41427	-0.131758	188.262	1.82342e-25
ENSG00000225200	AB019441.29	processed_pseudogene				-0.336107	7.90494	29.8242	2.67487e-07
ENSG00000183044	ABAT	protein_coding	4-aminobutyrate aminotransferase, eukaryotic	4-aminobutyrate aminotransferase	4-@AMINOBUTYRATE AMINOTRANSFERASE; ABAT;;GAMMA-AMINOBUTYRATE TRANSAMINASE; GABAT;;GABA-TRANSFERASE;;GABA-TRANSAMINASE	3.02651	3.80876	463.727	1.2478e-42
ENSG00000283544	ABBA01000934.1	unprocessed_pseudogene				-0.964792	1.14239	31.4224	1.39175e-07
ENSG00000283566	ABC13-47656900H15.1	protein_coding	Protein kinase domain			0.0467714	0.835882	0.096391	0.756754
ENSG00000165029	ABCA1	protein_coding	ABC transporter-like	ATP binding cassette subfamily A member 1	ATP-BINDING CASSETTE, SUBFAMILY A, MEMBER 1; ABCA1;;ATP-BINDING CASSETTE 1; ABC1;;ATP-BINDING CASSETTE TRANSPORTER 1;;ABC TRANSPORTER 1;;CHOLESTEROL EFFLUX REGULATORY PROTEIN; CERPCORONARY HEART DISEASE IN FAMILIAL HYPERCHOLESTEROLEMIA, PROTECTIONAG /.../ INCLUDED;;HIGH DENSITY LIPOPROTEIN CHOLESTEROL LEVEL QUANTITATIVE TRAIT LOCUS13, INCLUDED; HDLCQ13, INCLUDED	-3.09837	2.12415	295.439	7.08218e-34
ENSG00000251595	ABCA11P	transcribed_processed_pseudogene				-1.03785	0.391267	26.7205	9.7391e-07
ENSG00000238098	ABCA17P	unitary_pseudogene				-1.82972	2.6566	47.0373	3.44073e-10
ENSG00000107331	ABCA2	protein_coding	ABC transporter-like	ATP binding cassette subfamily A member 2	ATP-BINDING CASSETTE, SUBFAMILY A, MEMBER 2; ABCA2;;ATP-BINDING CASSETTE 2; ABC2;;ATP-BINDING CASSETTE TRANSPORTER 2;;ABC TRANSPORTER 2;;KIAA1062	-0.356307	6.23922	14.1825	0.000260575
ENSG00000167972	ABCA3	protein_coding	ABC transporter-like	ATP binding cassette subfamily A member 3	ATP-BINDING CASSETTE, SUBFAMILY A, MEMBER 3; ABCA3;;ATP-BINDING CASSETTE 3; ABC3;;ATP-BINDING CASSETTE TRANSPORTER 3;;ABC TRANSPORTER 3;;CED7, C. ELEGANS, HOMOLOG OF	1.86389	4.31314	244.015	1.8155e-30
ENSG00000154265	ABCA5	protein_coding	ABC transporter-like	ATP binding cassette subfamily A member 5	ATP-BINDING CASSETTE, SUBFAMILY A, MEMBER 5; ABCA5;;KIAA1888	0.282571	0.929977	0.888941	0.347747
ENSG00000064687	ABCA7	protein_coding	ABC transporter A, ABCA	ATP binding cassette subfamily A member 7		4.35749	6.53421	1104.31	4.60516e-61
ENSG00000135776	ABCB10	protein_coding	ABC transporter-like	ATP binding cassette subfamily B member 10	ATP-BINDING CASSETTE, SUBFAMILY B, MEMBER 10; ABCB10;;MITOCHONDRIAL ABC PROTEIN 2; MABC2; MTABC2	-1.13155	6.68982	358.767	1.56758e-37
ENSG00000131269	ABCB7	protein_coding	ABC transporter-like	ATP binding cassette subfamily B member 7	ATP-BINDING CASSETTE, SUBFAMILY B, MEMBER 7; ABCB7;;ATP-BINDING CASSETTE 7; ABC7;;ATP-BINDING CASSETTE TRANSPORTER 7;;ABC TRANSPORTER 7	-0.664738	5.68575	190.644	2.27324e-26
ENSG00000197150	ABCB8	protein_coding		ATP binding cassette subfamily B member 8	ATP-BINDING CASSETTE, SUBFAMILY B, MEMBER 8; ABCB8;;MITOCHONDRIAL ATP-BINDING CASSETTE 1; MABC1	-0.537636	4.5188	42.1646	2.09035e-09
ENSG00000150967	ABCB9	protein_coding	ABC transporter-like	ATP binding cassette subfamily B member 9	ATP-BINDING CASSETTE, SUBFAMILY B, MEMBER 9; ABCB9	0.375953	1.90789	6.92799	0.00962356
ENSG00000103222	ABCC1	protein_coding	ABC transporter-like	ATP binding cassette subfamily C member 1	ATP-BINDING CASSETTE, SUBFAMILY C, MEMBER 1; ABCC1;;MULTIDRUG RESISTANCE-ASSOCIATED PROTEIN 1; MRP1;;MULTIDRUG RESISTANCE-ASSOCIATED PROTEIN; MRP	-0.372212	6.94865	43.988	1.0569e-09
ENSG00000124574	ABCC10	protein_coding	ABC transporter-like	ATP binding cassette subfamily C member 10	ATP-BINDING CASSETTE, SUBFAMILY C, MEMBER 10; ABCC10;;MULTIDRUG RESISTANCE-ASSOCIATED PROTEIN 7; MRP7	0.962055	5.11631	147.308	1.77492e-22
ENSG00000023839	ABCC2	protein_coding	ABC transporter-like	ATP binding cassette subfamily C member 2	ATP-BINDING CASSETTE, SUBFAMILY C, MEMBER 2; ABCC2;;MULTISPECIFIC ORGANIC ANION TRANSPORTER, CANALICULAR; CMOAT;;MULTIDRUG RESISTANCE-ASSOCIATED PROTEIN 2; MRP2	1.91123	0.14655	63.2717	1.23856e-12
ENSG00000125257	ABCC4	protein_coding	ABC transporter-like	ATP binding cassette subfamily C member 4	ATP-BINDING CASSETTE, SUBFAMILY C, MEMBER 4; ABCC4;;MULTIDRUG RESISTANCE-ASSOCIATED PROTEIN 4; MRP4;;MULTISPECIFIC ORGANIC ANION TRANSPORTER B; MOATB	-1.80312	6.09141	677.448	1.21266e-50
ENSG00000114770	ABCC5	protein_coding	ABC transporter-like	ATP binding cassette subfamily C member 5	ATP-BINDING CASSETTE, SUBFAMILY C, MEMBER 5; ABCC5;;MULTIDRUG RESISTANCE-ASSOCIATED PROTEIN 5; MRP5;;MOATC	0.376762	5.32881	43.1199	1.46082e-09
ENSG00000101986	ABCD1	protein_coding	ABC transporter-like	ATP binding cassette subfamily D member 1	ATP-BINDING CASSETTE, SUBFAMILY D, MEMBER 1; ABCD1;;ADRENOLEUKODYSTROPHY PROTEIN; ALDP	0.694706	5.7984	63.4529	1.1667e-12
ENSG00000117528	ABCD3	protein_coding	ABC transporter-like	ATP binding cassette subfamily D member 3	ATP-BINDING CASSETTE, SUBFAMILY D, MEMBER 3; ABCD3;;PEROXISOMAL MEMBRANE PROTEIN 1; PXMP1;;PEROXISOMAL MEMBRANE PROTEIN, 70-KD; PMP70	-0.274017	5.74668	19.3506	2.40303e-05
ENSG00000119688	ABCD4	protein_coding	ABC transporter-like	ATP binding cassette subfamily D member 4	ATP-BINDING CASSETTE, SUBFAMILY D, MEMBER 4; ABCD4;;PEROXISOMAL MEMBRANE PROTEIN 1-LIKE; PXMP1L;;P70R;;PMP69	-0.40619	4.0528	29.9495	2.54054e-07
ENSG00000164163	ABCE1	protein_coding	ABC transporter-like	ATP binding cassette subfamily E member 1	RIBONUCLEASE 4 INHIBITOR; RNS4I;;RNase L INHIBITOR;;ATP-BINDING CASSETTE, SUBFAMILY E, MEMBER 1; ABCE1	-2.05959	7.6732	528.638	2.43555e-45
ENSG00000204574	ABCF1	protein_coding	ABC transporter-like	ATP binding cassette subfamily F member 1	ATP-BINDING CASSETTE, SUBFAMILY F, MEMBER 1; ABCF1;;ATP-BINDING CASSETTE 50; ABC50	-0.78462	7.05996	238.876	4.22764e-30
ENSG00000033050	ABCF2	protein_coding	ABC transporter-like	ATP binding cassette subfamily F member 2	ATP-BINDING CASSETTE, SUBFAMILY F, MEMBER 2; ABCF2;;HUMAN SEQUENCE SIMILAR TO YEAST 18; HUSSY18	-1.7048	6.86477	1020.33	8.17818e-60
ENSG00000161204	ABCF3	protein_coding	ABC transporter-like	ATP binding cassette subfamily F member 3		-0.0296038	5.64487	0.310847	0.57822
ENSG00000144827	ABHD10	protein_coding		abhydrolase domain containing 10		-0.702978	5.11403	171.305	1.0485e-24
ENSG00000106077	ABHD11	protein_coding	Alpha/beta hydrolase fold-1	abhydrolase domain containing 11		0.252269	3.05092	5.43248	0.0214684
ENSG00000225969	ABHD11-AS1	antisense				1.8808	-1.08887	13.5194	0.000357214
ENSG00000100997	ABHD12	protein_coding		abhydrolase domain containing 12	ABHYDROLASE DOMAIN-CONTAINING PROTEIN 12; ABHD12	0.110967	5.56218	4.32402	0.0397504
ENSG00000139826	ABHD13	protein_coding	Serine aminopeptidase, S33	abhydrolase domain containing 13		0.950852	5.65945	165.689	3.34917e-24
ENSG00000248487	ABHD14A	protein_coding	Alpha/beta hydrolase fold-1	abhydrolase domain containing 14A		-1.39285	2.14957	109.914	1.46447e-18
ENSG00000114779	ABHD14B	protein_coding	Alpha/beta hydrolase fold-1	abhydrolase domain containing 14B		-0.243251	4.95186	12.8731	0.000486956
ENSG00000168792	ABHD15	protein_coding	Serine aminopeptidase, S33	abhydrolase domain containing 15		0.797712	5.12677	208.811	7.7034e-28
ENSG00000204427	ABHD16A	protein_coding	Alpha/beta hydrolase fold-1	abhydrolase domain containing 16A	ABHYDROLASE DOMAIN-CONTAINING 16A; ABHD16A;;HLA-B-ASSOCIATED TRANSCRIPT 5; BAT5;;D6S82E	2.02454	-0.287685	40.167	4.45584e-09
ENSG00000129968	ABHD17A	protein_coding	Serine aminopeptidase, S33	abhydrolase domain containing 17A		1.05737	6.22997	118.77	1.52062e-19
ENSG00000198658	ABHD17AP1	unprocessed_pseudogene				0.805944	3.79541	38.5154	8.39694e-09
ENSG00000250536	ABHD17AP3	unprocessed_pseudogene				0.447822	-0.372322	2.25874	0.135541
ENSG00000229107	ABHD17AP4	processed_pseudogene				0.305787	-0.486493	1.1347	0.288955
ENSG00000263366	ABHD17AP5	processed_pseudogene				0.272998	1.62146	2.42547	0.122063
ENSG00000226981	ABHD17AP6	unprocessed_pseudogene				1.73805	-0.490439	31.5058	1.34541e-07
ENSG00000107362	ABHD17B	protein_coding	Serine aminopeptidase, S33	abhydrolase domain containing 17B		-0.53071	4.92571	84.2951	1.76833e-15
ENSG00000136379	ABHD17C	protein_coding	Alpha/Beta hydrolase fold	abhydrolase domain containing 17C		-1.46821	3.94887	433.679	2.85044e-41
ENSG00000164074	ABHD18	protein_coding	Abhydrolase domain containing 18	abhydrolase domain containing 18		0.424836	4.60597	32.1391	1.04099e-07
ENSG00000140526	ABHD2	protein_coding		abhydrolase domain containing 2	ABHYDROLASE DOMAIN-CONTAINING 2; ABHD2;;LUNG ALPHA/BETA HYDROLASE 2; LABH2	0.796243	7.30532	355.423	2.37499e-37
ENSG00000158201	ABHD3	protein_coding	Alpha/beta hydrolase fold-1	abhydrolase domain containing 3	ABHYDROLASE DOMAIN-CONTAINING 3; ABHD3;;LUNG ALPHA/BETA HYDROLASE 3; LABH3	1.09885	5.64669	245.248	1.48492e-30
ENSG00000100439	ABHD4	protein_coding	Alpha/beta hydrolase fold-1	abhydrolase domain containing 4		2.28609	2.32865	134.187	3.59462e-21
ENSG00000011198	ABHD5	protein_coding	Alpha/beta hydrolase fold-1	abhydrolase domain containing 5	ABHYDROLASE DOMAIN-CONTAINING 5; ABHD5;;COMPARATIVE GENE IDENTIFICATION 58; CGI58;;NCIE2 GENE; NCIE2	0.361772	3.78762	21.4947	9.25546e-06
ENSG00000163686	ABHD6	protein_coding	Alpha/beta hydrolase fold-1	abhydrolase domain containing 6		0.809885	2.87144	90.2154	3.17109e-16
ENSG00000136754	ABI1	protein_coding	Target SNARE coiled-coil homology domain	abl interactor 1	ABL INTERACTOR 1; ABI1;;SPECTRIN SH3 DOMAIN-BINDING PROTEIN 1; SSH3BP1;;E3B1ABI1/MLL FUSION GENE, INCLUDED	0.542464	6.64699	128.811	1.29144e-20
ENSG00000138443	ABI2	protein_coding	Target SNARE coiled-coil homology domain	abl interactor 2		-0.81155	5.60598	216.445	1.9651e-28
ENSG00000108798	ABI3	protein_coding	SH3 domain	ABI family member 3	ABI FAMILY MEMBER 3; ABI3;;NESH PROTEIN; NESH	-1.62241	1.64315	77.5139	1.35067e-14
ENSG00000097007	ABL1	protein_coding	Protein kinase domain	ABL proto-oncogene 1, non-receptor tyrosine kinase	ABELSON MURINE LEUKEMIA VIRAL ONCOGENE HOMOLOG 1; ABL1;;TRANSFORMATION GENE: ONCOGENE ABL;;ABELSON STRAIN OF MURINE LEUKEMIA VIRUS; ABLABL1/BCR FUSION GENE, INCLUDED;;ABL1/NUP214 FUSION GENE, INCLUDED	-0.498974	7.0272	55.1738	1.91284e-11
ENSG00000143322	ABL2	protein_coding	Protein kinase domain	ABL proto-oncogene 2, non-receptor tyrosine kinase	V-ABL ABELSON MURINE LEUKEMIA VIRAL ONCOGENE HOMOLOG 2; ABL2;;ONCOGENE ABL2;;ONCOGENE ABLL;;ABELSON-RELATED GENE; ARG;;ONCOGENE ARGABL2/ETV6 FUSION GENE, INCLUDED	-0.923669	5.47771	300.252	3.57453e-34
ENSG00000099204	ABLIM1	protein_coding	Villin headpiece	actin binding LIM protein 1	ACTIN-BINDING LIM PROTEIN FAMILY, MEMBER 1; ABLIM1;;ABLIM;;LIM ACTIN-BINDING PROTEIN 1; LIMAB1;;LIMATIN	-0.293698	5.69402	23.0407	4.70478e-06
ENSG00000159842	ABR	protein_coding	C2 domain	active BCR-related	ACTIVE BCR-RELATED GENE; ABR	0.510488	7.0235	69.6005	1.59165e-13
ENSG00000146386	ABRACL	protein_coding	Costars domain	ABRA C-terminal like		0.132858	6.311	3.86038	0.0517963
ENSG00000146109	ABT1	protein_coding	Nucleotide-binding alpha-beta plait domain	activator of basal transcription 1		-0.555264	5.96662	98.0056	3.56132e-17
ENSG00000114626	ABTB1	protein_coding		ankyrin repeat and BTB domain containing 1	ANKYRIN REPEAT AND BTB/POZ DOMAIN CONTAINING 1; ABTB1;;BPOZ	5.23208	6.3681	954.544	1.56542e-57
ENSG00000166016	ABTB2	protein_coding	BTB/POZ domain	ankyrin repeat and BTB domain containing 2		0.450435	3.89902	16.1157	0.000105253
ENSG00000270393	AC000095.9	processed_pseudogene				4.06956	-1.59562	25.3414	1.85682e-06
ENSG00000280347	AC000123.2	TEC				0.231825	1.28675	2.33869	0.12888
ENSG00000278727	AC000403.4	lincRNA				3.39765	-0.191206	89.0902	4.37892e-16
ENSG00000235560	AC002310.12	antisense				0.160041	-0.258235	0.502481	0.479814
ENSG00000241764	AC002467.7	antisense				0.798554	0.812952	20.4298	1.48313e-05
ENSG00000196656	AC004057.1	transcribed_processed_pseudogene				-0.787614	-0.73101	6.9699	0.00941327
ENSG00000251259	AC004069.2	lincRNA				2.21821	-0.41021	33.42	6.21887e-08
ENSG00000005189	AC004381.6	protein_coding		exonuclease NEF-sp		-1.02159	3.78836	122.001	6.79899e-20
ENSG00000146677	AC004453.8	processed_pseudogene				-0.684862	1.39494	28.1306	5.3929e-07
ENSG00000242687	AC004893.11	antisense				0.616987	1.61423	16.9775	7.06809e-05
ENSG00000243554	AC004967.7	unprocessed_pseudogene				-0.303723	1.29422	3.64102	0.0588093
ENSG00000205485	AC004980.7	transcribed_unprocessed_pseudogene				-0.453239	2.334	24.829	2.17509e-06
ENSG00000233225	AC004987.9	processed_pseudogene				0.66068	0.362367	9.20975	0.00296367
ENSG00000224280	AC005014.5	processed_pseudogene				-0.120626	0.993756	0.557708	0.456675
ENSG00000233834	AC005083.1	processed_transcript				-0.350573	0.401106	4.81916	0.0301079
ENSG00000196295	AC005154.6	processed_transcript				2.24849	1.47869	147.576	1.67161e-22
ENSG00000244480	AC005154.7	transcribed_processed_pseudogene				3.40751	-1.17855	39.0529	6.82681e-09
ENSG00000267283	AC005306.3	processed_transcript				2.16588	-0.222696	42.1517	2.10052e-09
ENSG00000214719	AC005562.1	processed_transcript				0.690862	-0.154847	9.00328	0.00329065
ENSG00000228649	AC005682.5	processed_transcript				-2.16534	1.04616	197.61	6.06595e-27
ENSG00000268034	AC005795.1	processed_pseudogene				-0.355381	0.375217	4.10688	0.0449701
ENSG00000231916	AC006033.22	processed_pseudogene				-0.147555	2.24383	1.07534	0.301869
ENSG00000261342	AC006538.1	sense_intronic				0.196577	1.12439	1.40982	0.237478
ENSG00000273203	AC006946.16	lincRNA				0.752676	-1.22924	6.78244e-08	0.999793
ENSG00000235859	AC006978.6	processed_pseudogene				-0.168587	2.87579	4.05029	0.0464474
ENSG00000229127	AC007038.7	antisense				1.44519	-0.367113	18.5137	3.50567e-05
ENSG00000172974	AC007318.5	processed_pseudogene				-0.75491	0.915279	25.2547	1.81329e-06
ENSG00000227946	AC007383.3	lincRNA				1.40948	0.952734	41.1165	3.10552e-09
ENSG00000239467	AC007405.6	lincRNA				1.09875	0.215445	11.1923	0.0011028
ENSG00000233762	AC007969.5	processed_pseudogene				-0.447741	1.85129	10.0681	0.00192495
ENSG00000213237	AC008155.1	processed_pseudogene				-0.325878	1.26469	0.938704	0.334644
ENSG00000239763	AC009120.3	processed_pseudogene				2.62491	-0.538181	32.6226	8.56523e-08
ENSG00000259972	AC009120.6	processed_transcript				1.54893	1.57757	75.4496	2.54463e-14
ENSG00000238045	AC009133.12	antisense				-0.898944	0.578682	20.4713	1.45599e-05
ENSG00000259952	AC009133.15	antisense				-1.13072	0.0531992	14.7738	0.000197069
ENSG00000216895	AC009403.2	antisense				0.360259	-0.0660311	2.41182	0.123108
ENSG00000226121	AC009487.6	processed_pseudogene				-0.504787	0.0567904	6.83205	0.0101236
ENSG00000224152	AC009506.1	antisense				1.43903	2.59752	194.5	1.08994e-26
ENSG00000223960	AC009948.5	antisense				-1.09526	1.32014	58.3058	6.53325e-12
ENSG00000225963	AC009950.2	antisense				0.806859	-0.466017	11.241	0.00107675
ENSG00000229738	AC010240.3	processed_pseudogene				-0.048166	1.38667	0.10313	0.748675
ENSG00000214784	AC010468.1	processed_pseudogene				0.524822	-0.369405	1.87067	0.174006
ENSG00000276256	AC011043.1	protein_coding		uncharacterized LOC102724951		-0.540874	0.595001	10.017	0.00197473
ENSG00000283602	AC011380.8	transcribed_unitary_pseudogene				5.94138	-1.60529	53.9493	1.99739e-10
ENSG00000227241	AC011998.4	processed_pseudogene				0.31376	4.41691	19.7751	1.98643e-05
ENSG00000213197	AC012066.1	processed_pseudogene				-2.09221	0.804444	211.1	5.09689e-28
ENSG00000235072	AC012074.2	lincRNA				1.48217	-0.646874	19.2196	2.54887e-05
ENSG00000231848	AC012354.8	processed_pseudogene				-0.465617	4.78045	47.0932	3.37134e-10
ENSG00000091436	AC013461.1	protein_coding	Protein kinase domain	sterile alpha motif and leucine zipper containing kinase AZK	LEUCINE ZIPPER- AND STERILE ALPHA MOTIF-CONTAINING KINASE; ZAK;;MLK-LIKE MITOGEN-ACTIVATED PROTEIN TRIPLE KINASE; MLTK;;MLK-RELATED KINASE; MRK	-1.20688	6.23608	335.606	2.96527e-36
ENSG00000223427	AC016716.1	processed_pseudogene				0.304424	1.87937	6.97707	0.00937777
ENSG00000232090	AC016724.6	processed_pseudogene				-1.0184	-0.0692695	25.9217	1.3653e-06
ENSG00000228305	AC016734.2	processed_pseudogene				-0.376026	1.30019	6.18462	0.0142889
ENSG00000218175	AC016739.2	processed_pseudogene				-0.607919	1.25623	16.4791	8.8946e-05
ENSG00000212978	AC016747.3	processed_transcript				0.268703	1.79042	6.71988	0.0107426
ENSG00000213110	AC019178.2	processed_pseudogene				0.920498	1.2612	36.106	2.14466e-08
ENSG00000213399	AC022210.2	processed_pseudogene				-0.713631	0.975114	11.2141	0.00109106
ENSG00000214135	AC024560.3	transcribed_unprocessed_pseudogene				-0.0245493	2.35694	0.0573968	0.811076
ENSG00000215068	AC025171.1	antisense				1.55825	1.72677	117.794	1.94348e-19
ENSG00000179859	AC025335.1	protein_coding	Zinc finger, RING-type			-0.385542	0.773477	5.66048	0.0189602
ENSG00000174977	AC026271.5	processed_pseudogene				-0.113353	0.993368	0.540352	0.463749
ENSG00000234028	AC062029.1	antisense				0.976218	-0.974708	8.60968	0.00402122
ENSG00000235651	AC064850.4	processed_pseudogene				-1.0228	4.01039	179.489	2.00978e-25
ENSG00000229512	AC068580.5	sense_intronic				3.81543	-0.721619	74.751	3.15797e-14
ENSG00000189229	AC069277.2	lincRNA				-0.880477	0.368401	18.8316	3.09086e-05
ENSG00000235499	AC073046.25	lincRNA				0.325803	1.78316	6.31113	0.013353
ENSG00000235574	AC073150.6	processed_pseudogene				-2.13627	1.29108	151.247	7.40737e-23
ENSG00000226999	AC073325.2	processed_pseudogene				0.250074	7.14341	13.8437	0.000306048
ENSG00000227470	AC073415.2	processed_pseudogene				-2.36403	-0.835173	49.3888	1.47001e-10
ENSG00000234072	AC074117.10	antisense				-0.531185	-0.416597	4.42012	0.0376499
ENSG00000283236	AC074141.3	transcribed_unprocessed_pseudogene				1.69906	-0.48569	32.7855	8.02186e-08
ENSG00000213963	AC074286.1	sense_overlapping				0.826955	-0.0240149	11.5436	0.000928245
ENSG00000225889	AC074289.1	antisense				1.92487	-1.04543	15.7044	0.000127438
ENSG00000231027	AC079325.6	unprocessed_pseudogene				4.30993	-2.11769	22.0359	1.22945e-05
ENSG00000237753	AC079922.3	lincRNA				1.96919	0.443686	56.0631	1.40703e-11
ENSG00000259820	AC083843.1	lincRNA				0.105908	0.204908	0.245034	0.621517
ENSG00000204745	AC083899.3	unprocessed_pseudogene				-1.78647	1.26982	162.338	6.77123e-24
ENSG00000279483	AC090498.1	protein_coding	Ribosomal protein L41			-0.34159	-0.27468	1.97986	0.162042
ENSG00000229368	AC090587.4	sense_overlapping				0.340211	0.510191	2.3221	0.130231
ENSG00000215196	AC091878.1	antisense				2.09842	-0.878029	21.4528	9.86971e-06
ENSG00000229503	AC092155.1	processed_pseudogene				-1.13549	-0.733776	21.0428	1.12996e-05
ENSG00000170846	AC093323.3	lincRNA				-0.311523	5.02842	31.8481	1.17101e-07
ENSG00000234231	AC093616.4	unprocessed_pseudogene				-0.963461	0.24378	24.7282	2.2711e-06
ENSG00000240859	AC093627.10	lincRNA				-0.149906	0.634358	0.714045	0.399819
ENSG00000220804	AC093642.5	transcribed_unprocessed_pseudogene				0.541434	0.153485	6.70449	0.0108306
ENSG00000232533	AC093673.5	antisense				3.37368	0.770756	214.364	2.84292e-28
ENSG00000213222	AC093724.2	processed_pseudogene				-2.15878	3.71675	400.531	1.10364e-39
ENSG00000225205	AC093818.1	antisense				0.366117	0.58553	2.34847	0.128091
ENSG00000152117	AC093838.4	transcribed_processed_pseudogene				0.7922	4.13555	72.8953	5.6263e-14
ENSG00000236432	AC097662.2	antisense				-0.333545	-0.591364	1.45187	0.230645
ENSG00000213846	AC098614.2	transcribed_processed_pseudogene				0.39645	2.41665	18.6743	3.25979e-05
ENSG00000227992	AC108463.2	processed_pseudogene				-0.453235	-0.547214	2.30303	0.131805
ENSG00000226789	AC110926.4	processed_pseudogene				-0.828305	0.474036	17.353	5.9491e-05
ENSG00000233223	AC113189.5	antisense				0.269442	2.00427	3.32386	0.0708202
ENSG00000254893	AC113404.1	protein_coding	Small GTPase superfamily			0.127681	-0.4278	0.356638	0.551527
ENSG00000274425	AC114271.2	antisense				0.021685	2.68752	0.0384194	0.844942
ENSG00000235486	AC114755.7	unprocessed_pseudogene				-1.95451	1.83261	183.607	8.90362e-26
ENSG00000231259	AC125232.1	unprocessed_pseudogene				-0.867309	1.71102	56.9222	1.04749e-11
ENSG00000279396	AC130469.1	TEC				6.26919	-1.11791	56.7396	2.30234e-11
ENSG00000274767	AC131056.3	antisense				4.93559	-1.05727	53.3069	4.99061e-11
ENSG00000215154	AC141586.5	transcribed_unprocessed_pseudogene				-0.181838	-0.47581	0.419765	0.518317
ENSG00000276728	AC142472.6	lincRNA				1.74454	-0.90926	27.501	7.01595e-07
ENSG00000235078	AC142528.1	antisense				1.07411	-0.327312	15.9007	0.000116308
ENSG00000273117	AC144652.1	lincRNA				1.81729	2.16729	131.756	6.38752e-21
ENSG00000261888	AC144831.1	lincRNA				4.70465	3.17152	857.01	7.49484e-56
ENSG00000274370	AC144831.3	lincRNA				4.18146	1.69102	359.946	1.35486e-37
[truncated: 12,931 more rows]

## Sheet: h1.1VsCont.0
Geneid	gene_name	biotype	interpro_description	wikigene_description	mim_gene_description	logFC	logCPM	F	PValue
[truncated: 13,113 more rows]

## Sheet: h1.1VsCont.3
Geneid	gene_name	biotype	interpro_description	wikigene_description	mim_gene_description	logFC	logCPM	F	PValue
[truncated: 13,113 more rows]

[truncated: 13 more sheets: h1.1VsCont.7, h1.2VsCont.0, h1.2VsCont.3, h1.2VsCont.7, h1.3VsCont.0, h1.3VsCont.3, h1.3VsCont.7, h1.4VsCont.0, h1.4VsCont.3, h1.4VsCont.7, h1.5VsCont.0, h1.5VsCont.3, h1.5VsCont.7]
