# Supplementary figures and images for: Linker histone H1.2 and H1.4 affect the neutrophil lineage determination
Source: eLife journal article supplement (doi:10.7554/elife.52563), 2020-05-11

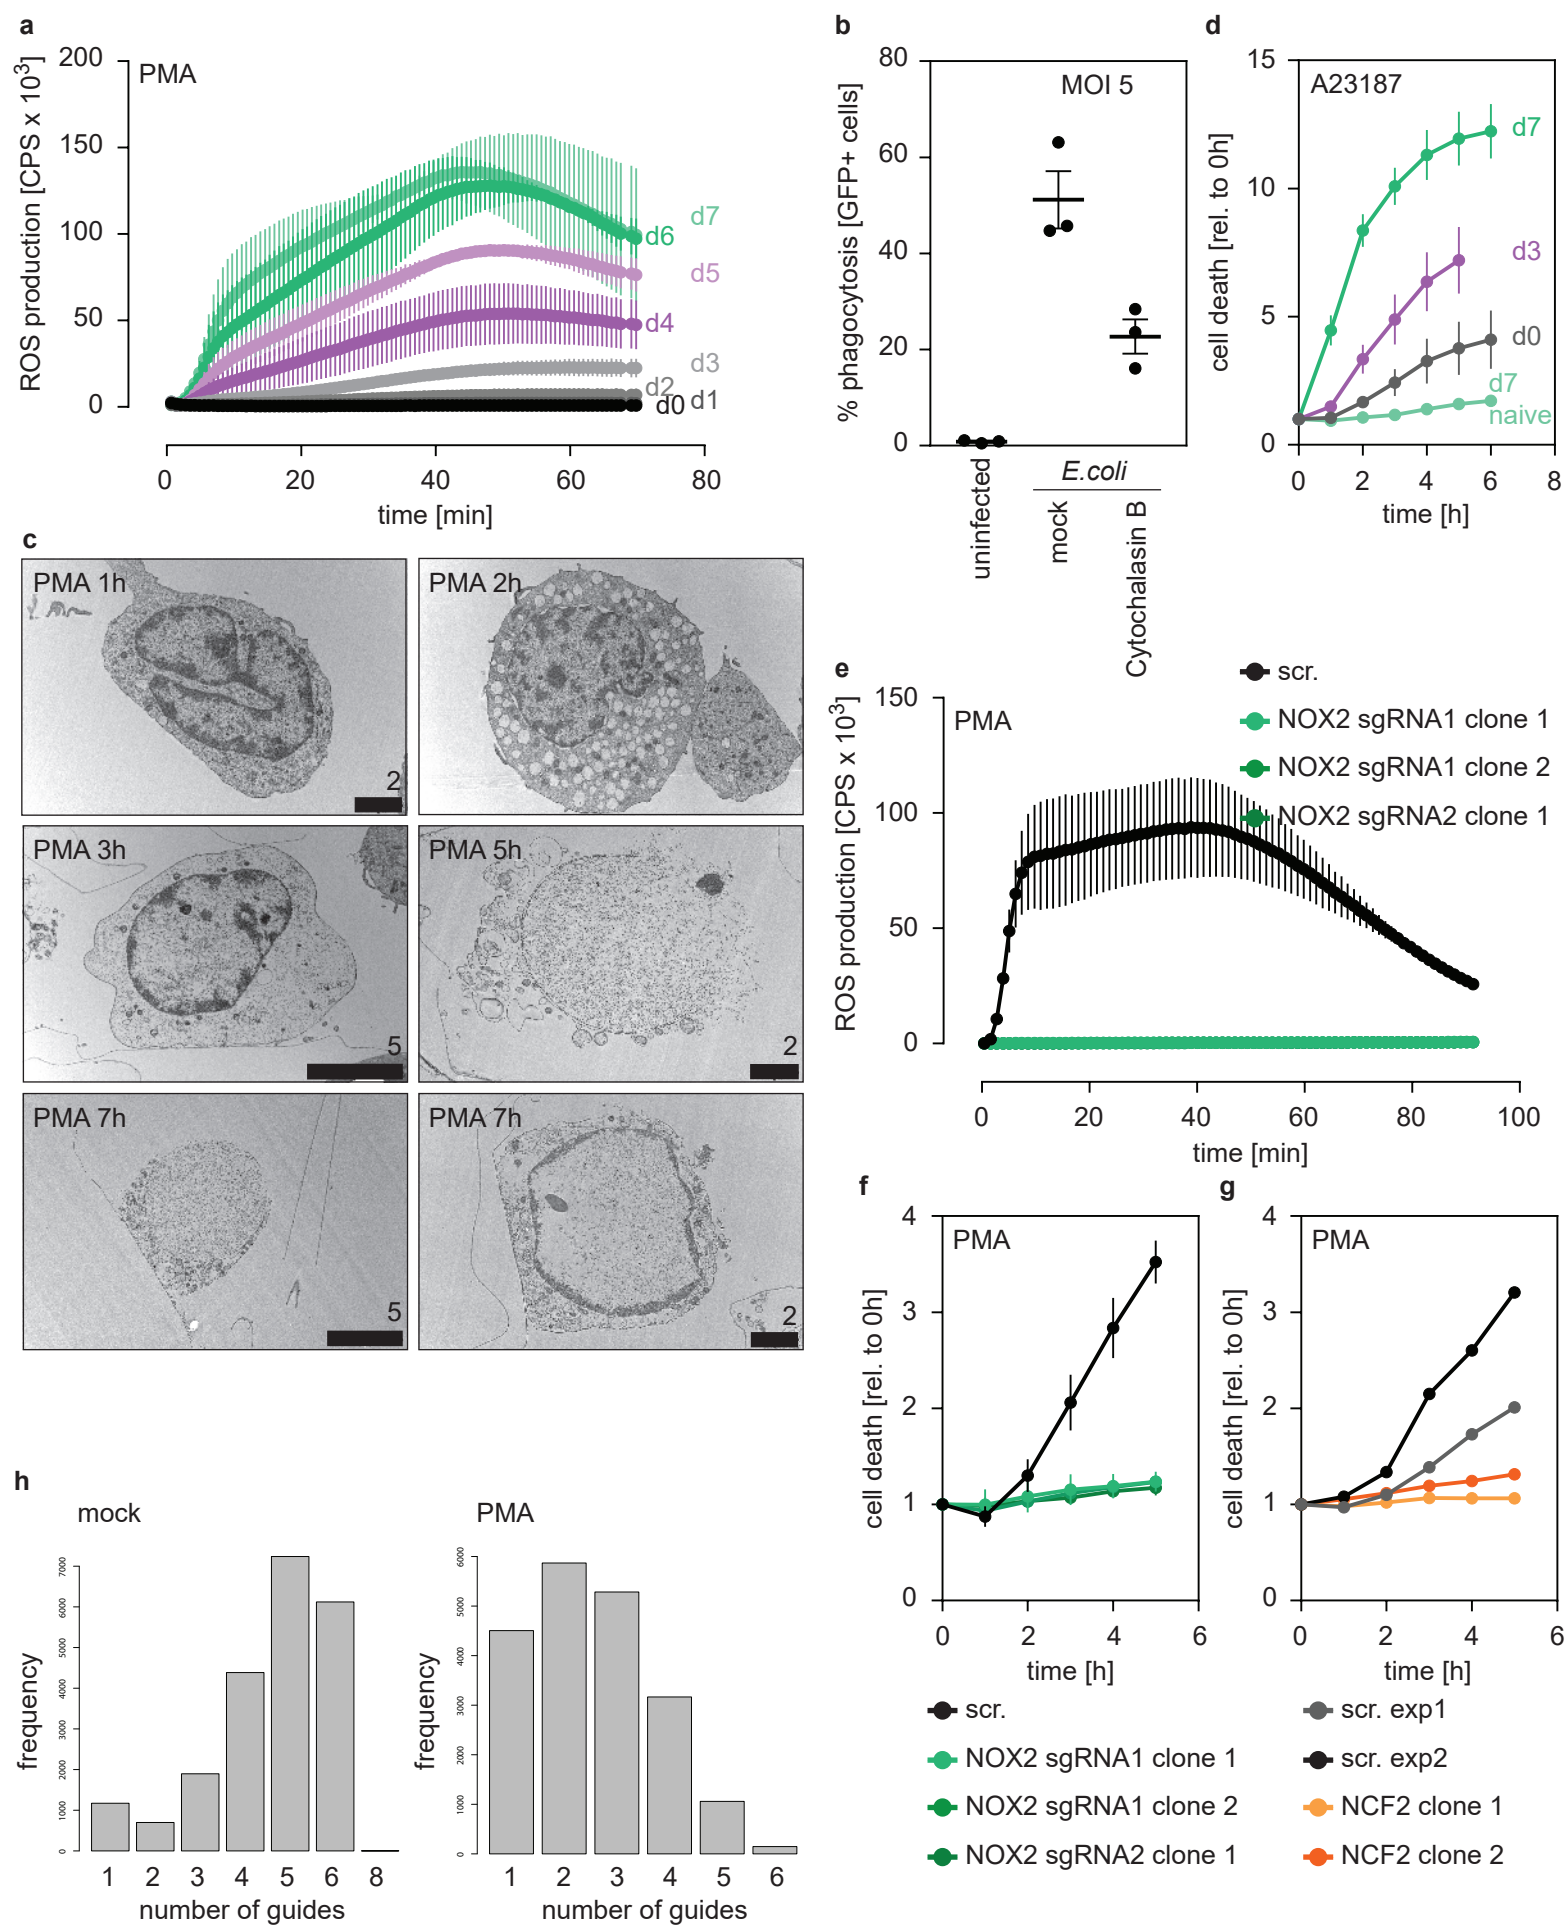

Figure 1 - figure supplement 1

Supplement: supp [file elife_poa_e52563_Figure_1_figure_supplement_1.pdf › elife_poa_e52563_Figure_1_figure_supplement_1.pdf]

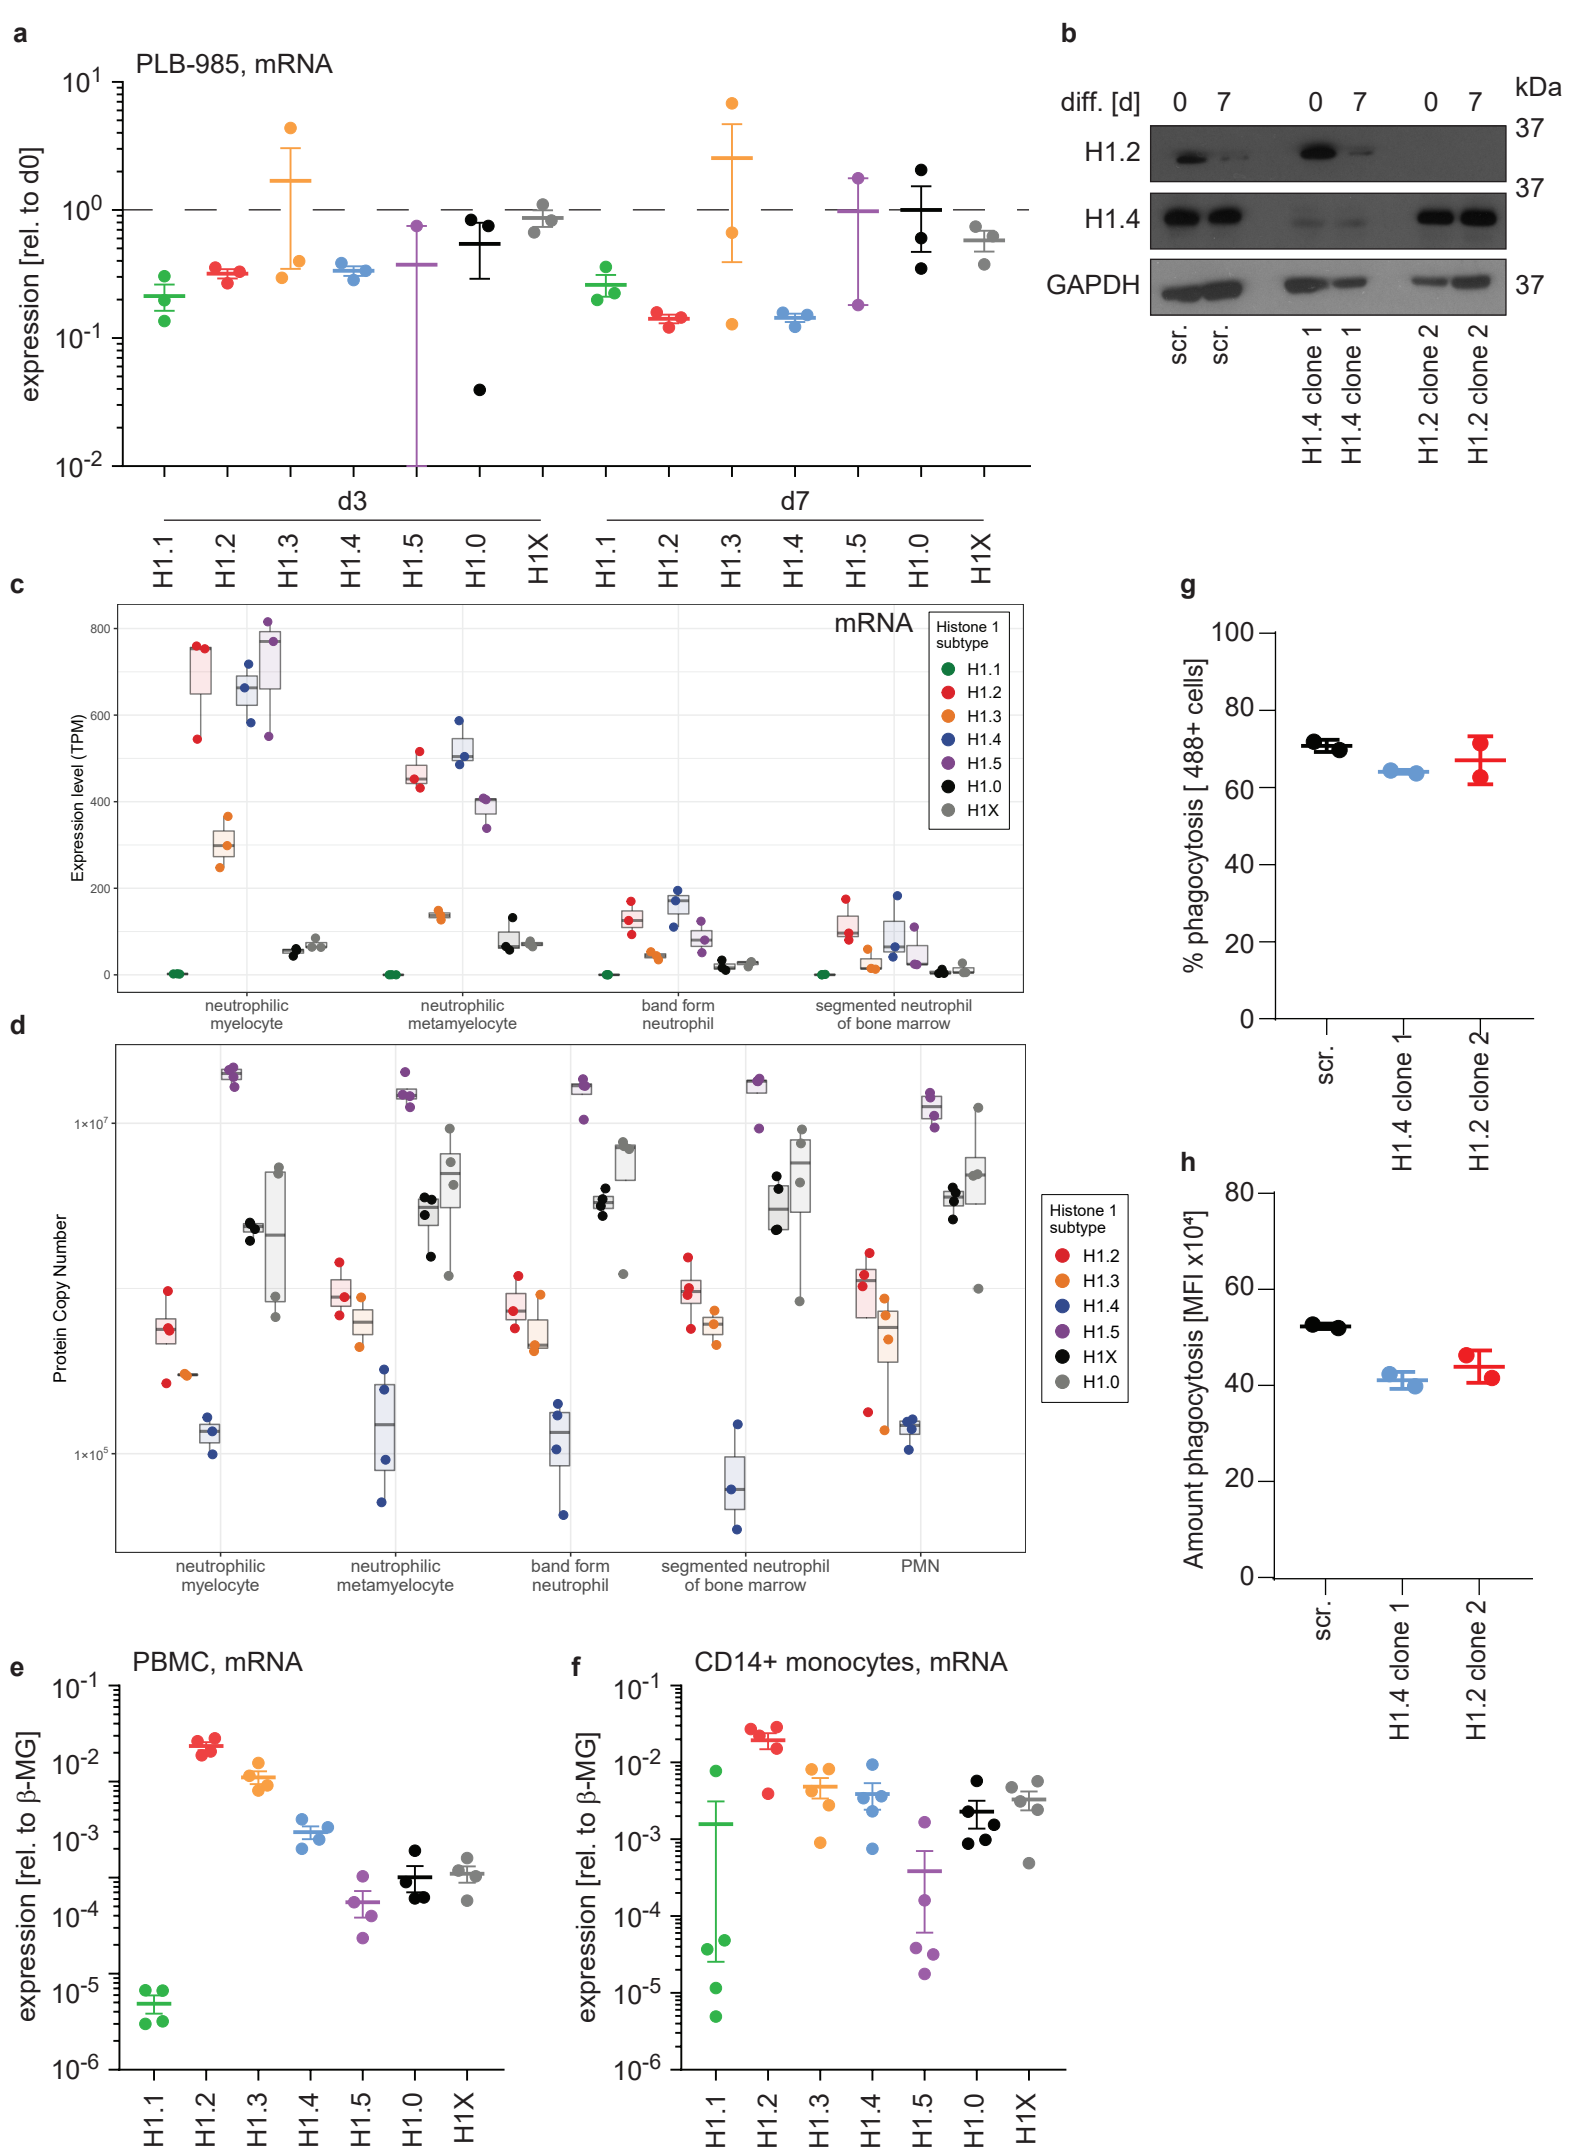

Figure 2 - figure supplement 1

Supplement: supp [file elife_poa_e52563_Figure_2_figure_supplement_1.pdf › elife_poa_e52563_Figure_2_figure_supplement_1.pdf]

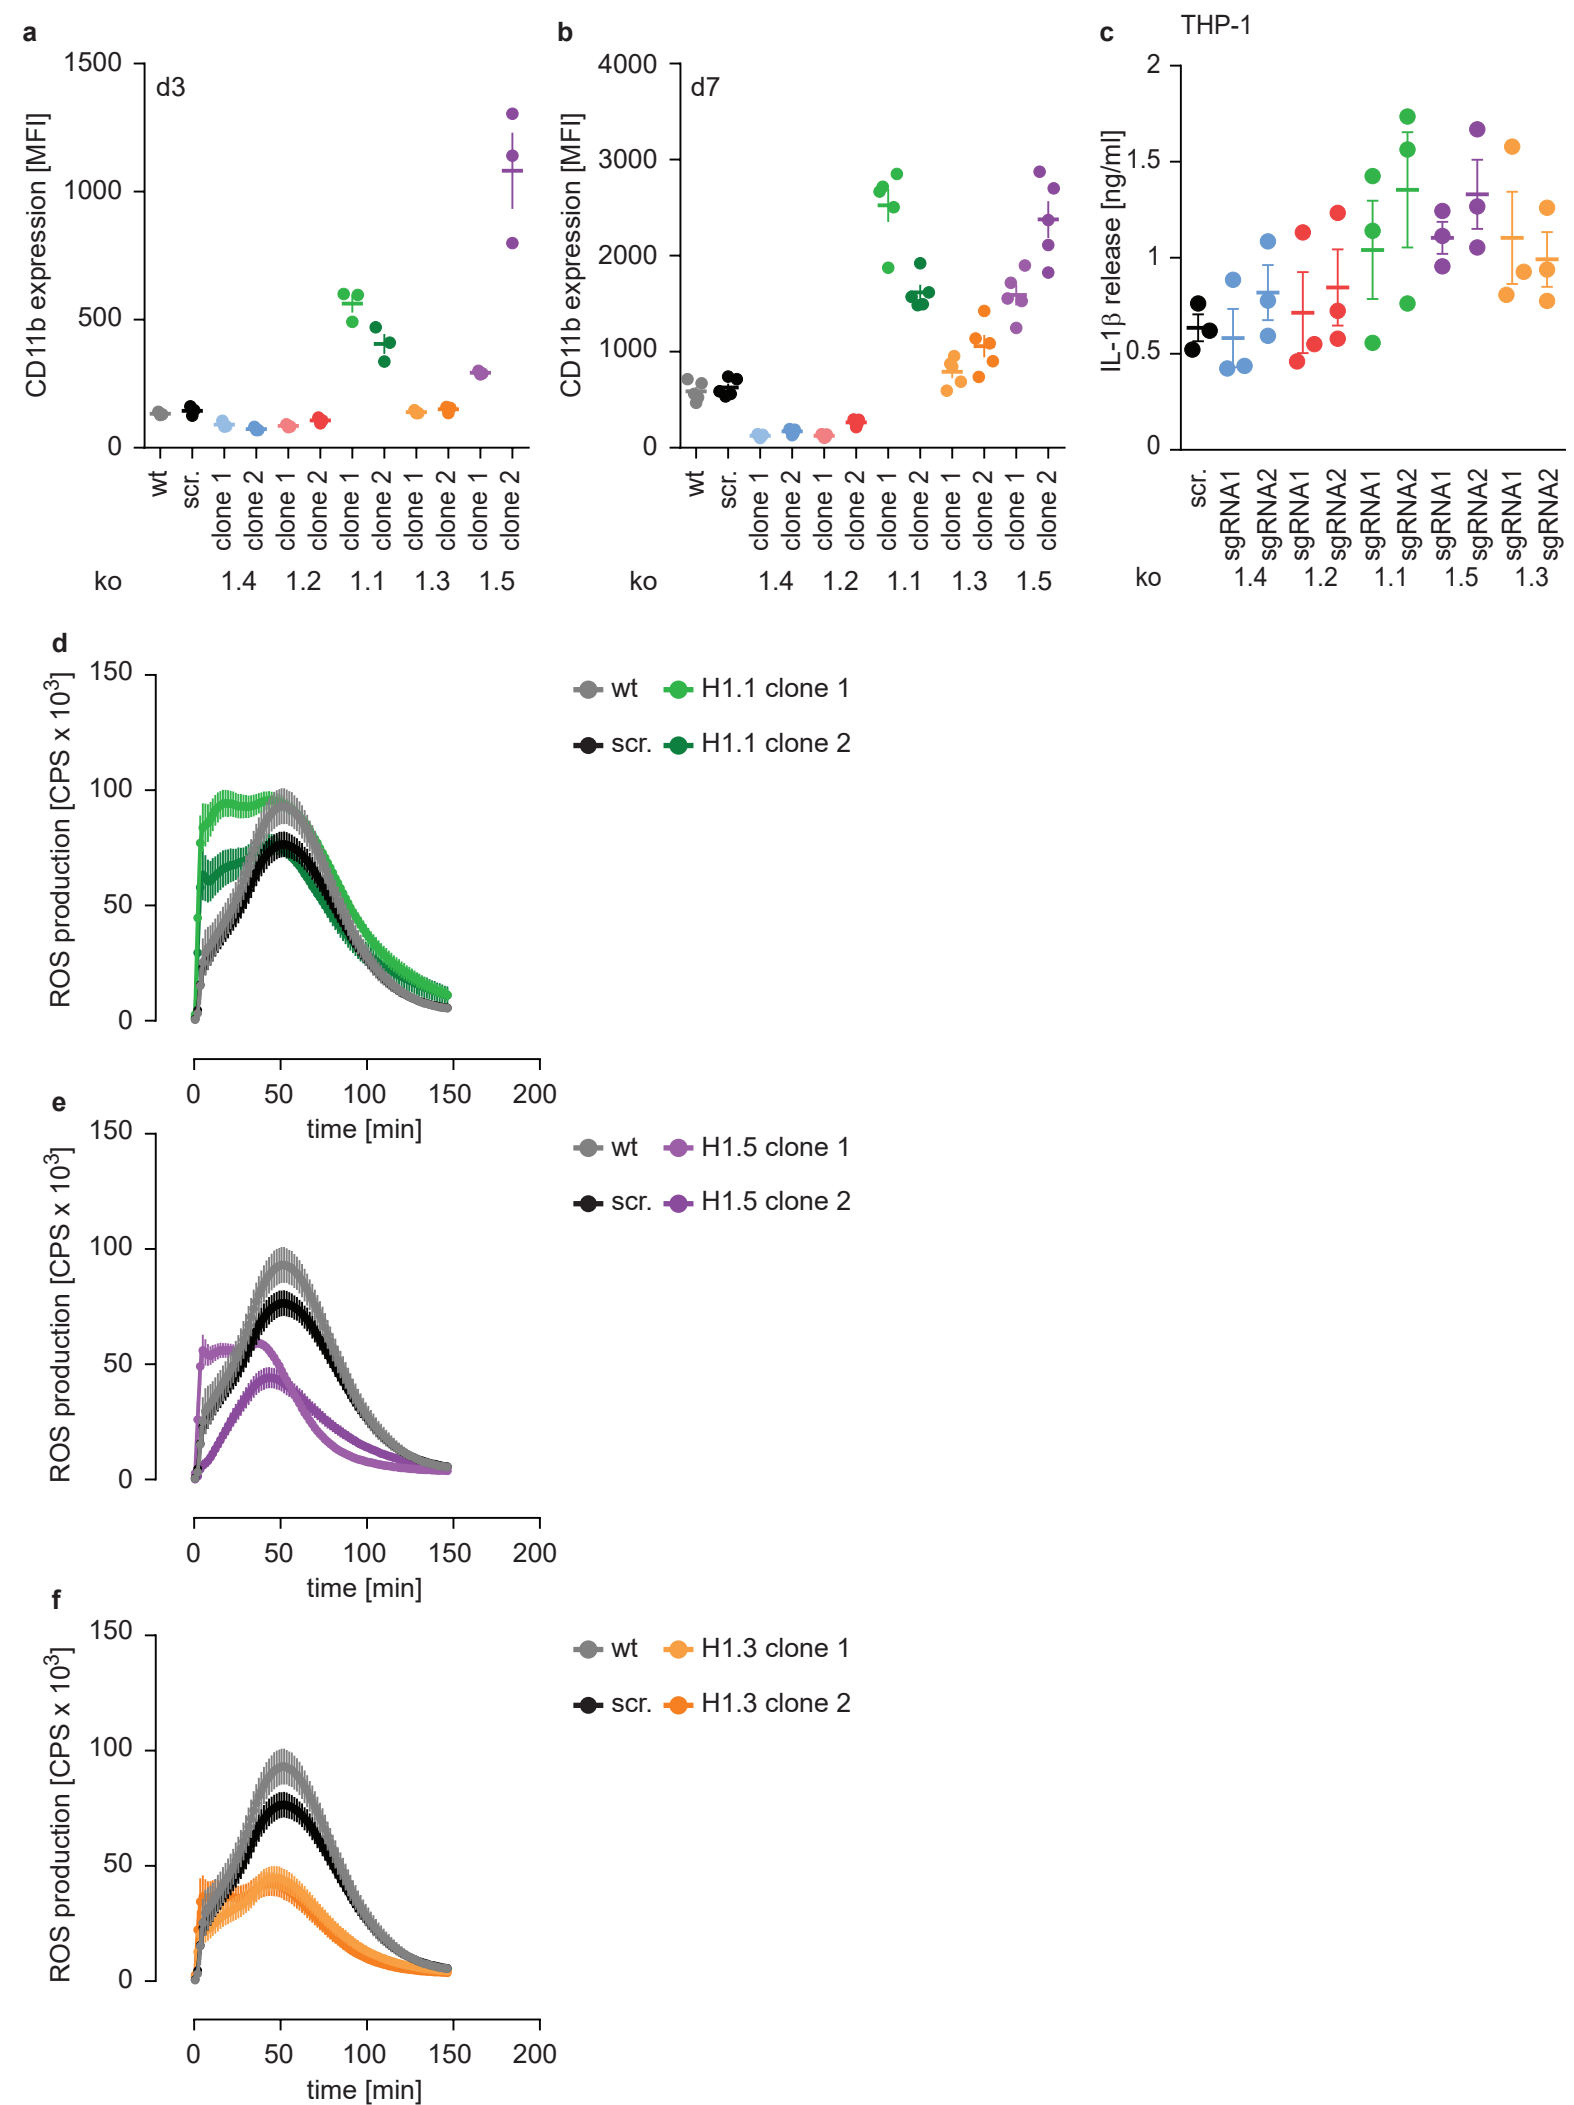

Figure 3 - figure supplement 1

Supplement: supp [file elife_poa_e52563_Figure_3_figure_supplement_1.pdf › elife_poa_e52563_Figure_3_figure_supplement_1.pdf]

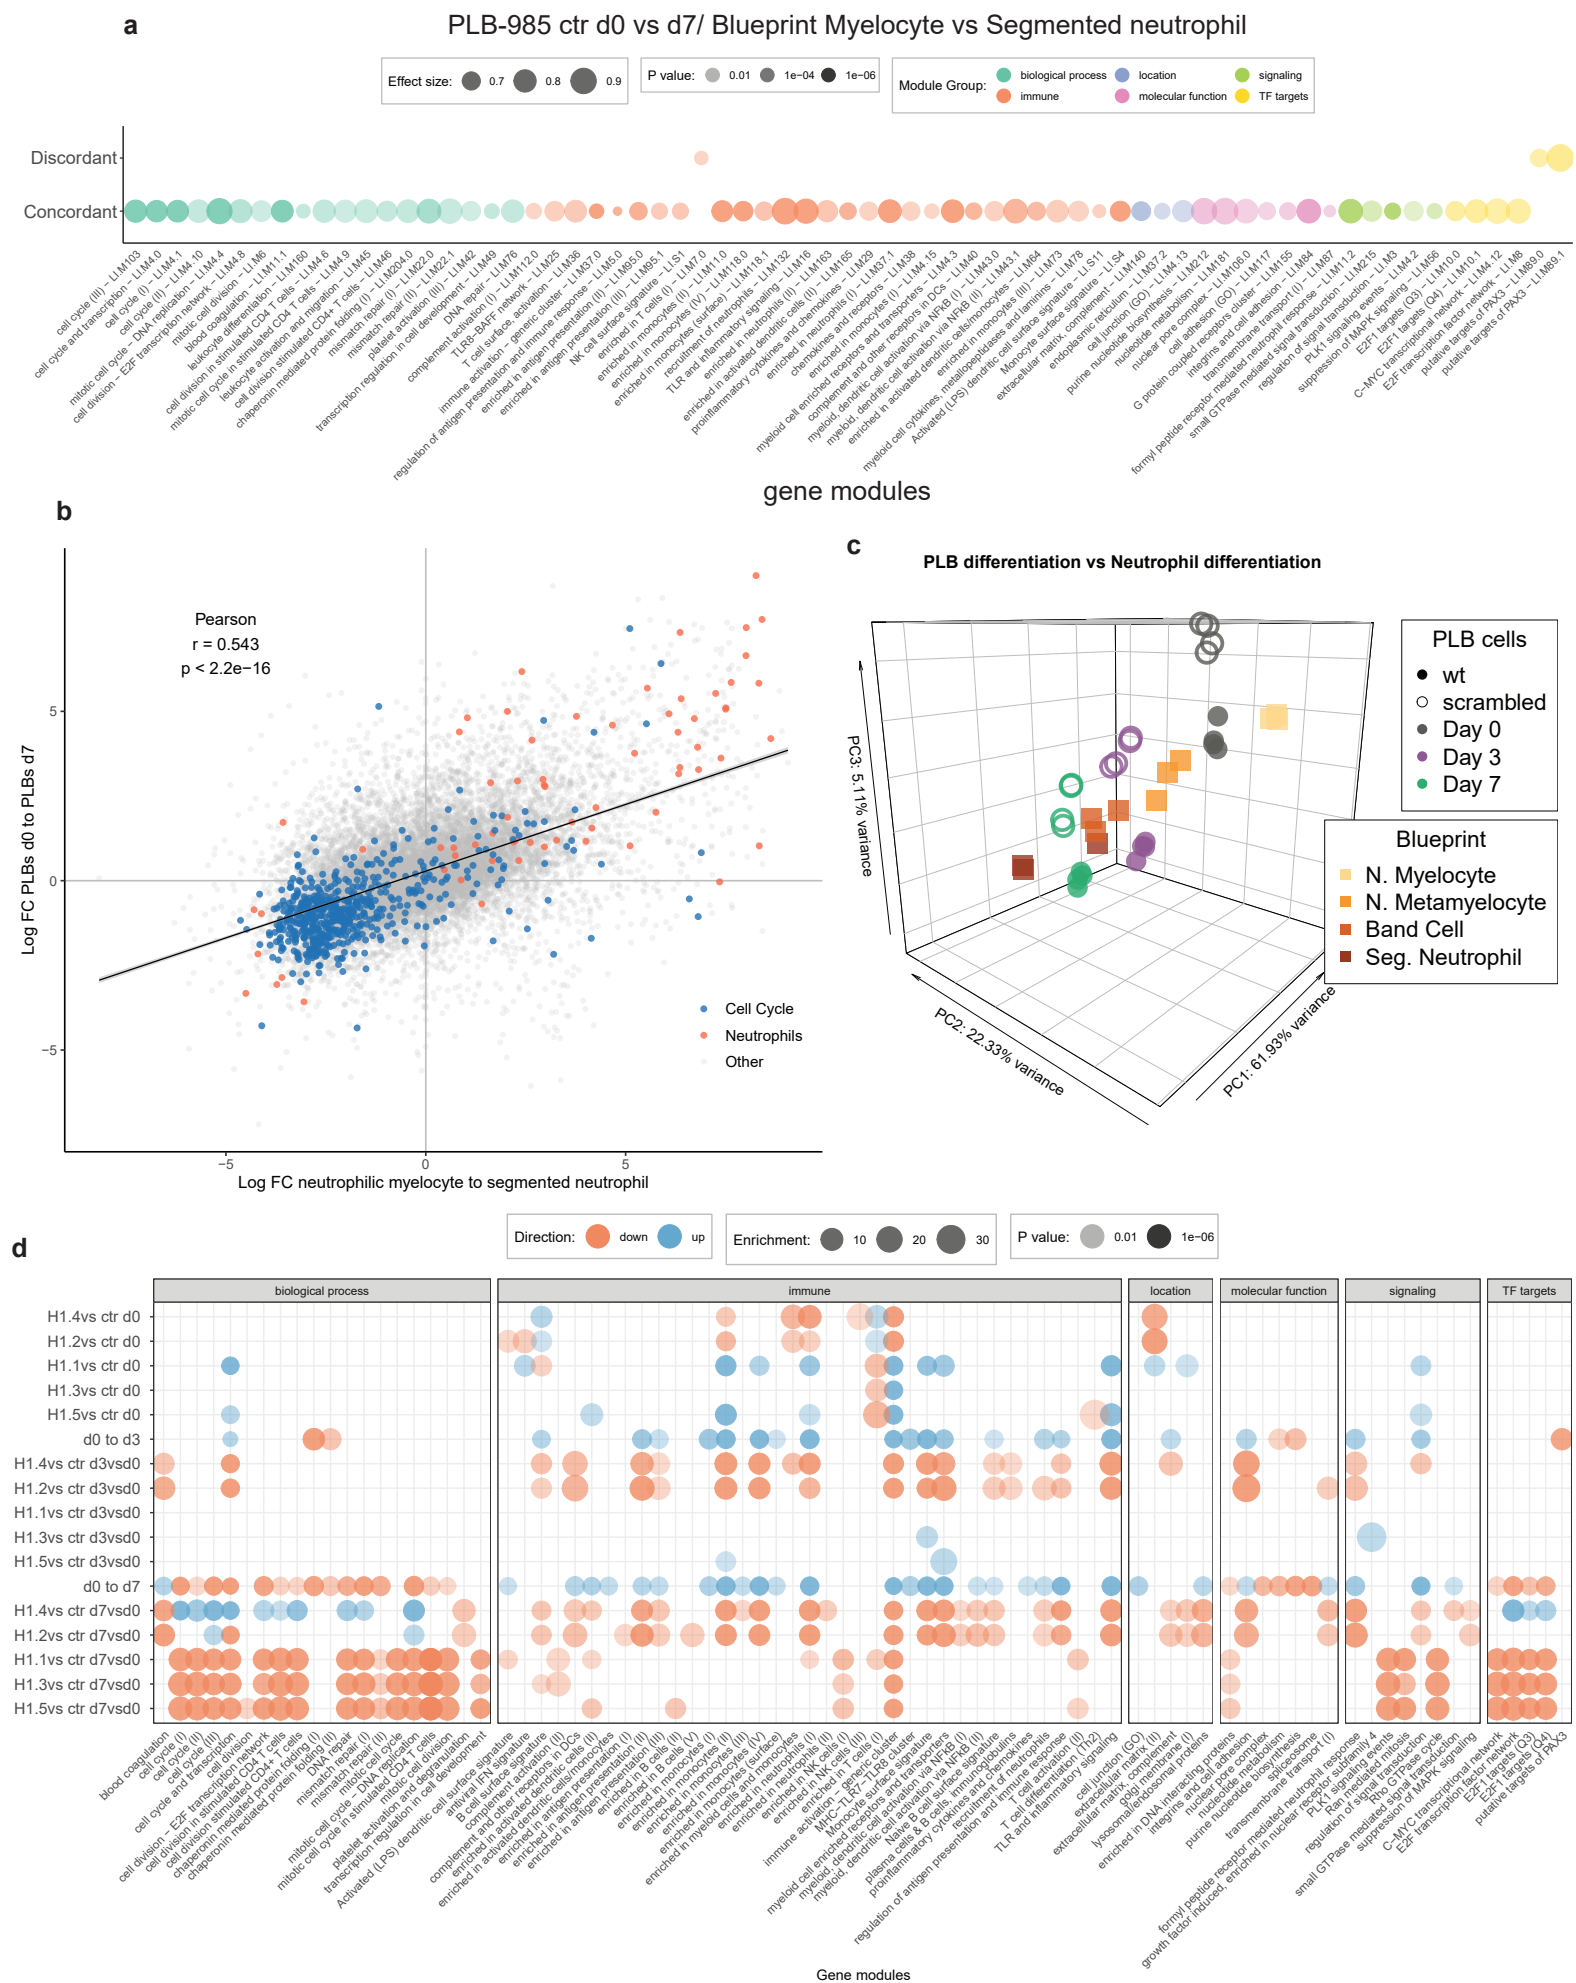

Figure 4 - figure supplement 1

Supplement: supp [file elife_poa_e52563_Figure_4_figure_supplement_1.pdf › elife_poa_e52563_Figure_4_figure_supplement_1.pdf]

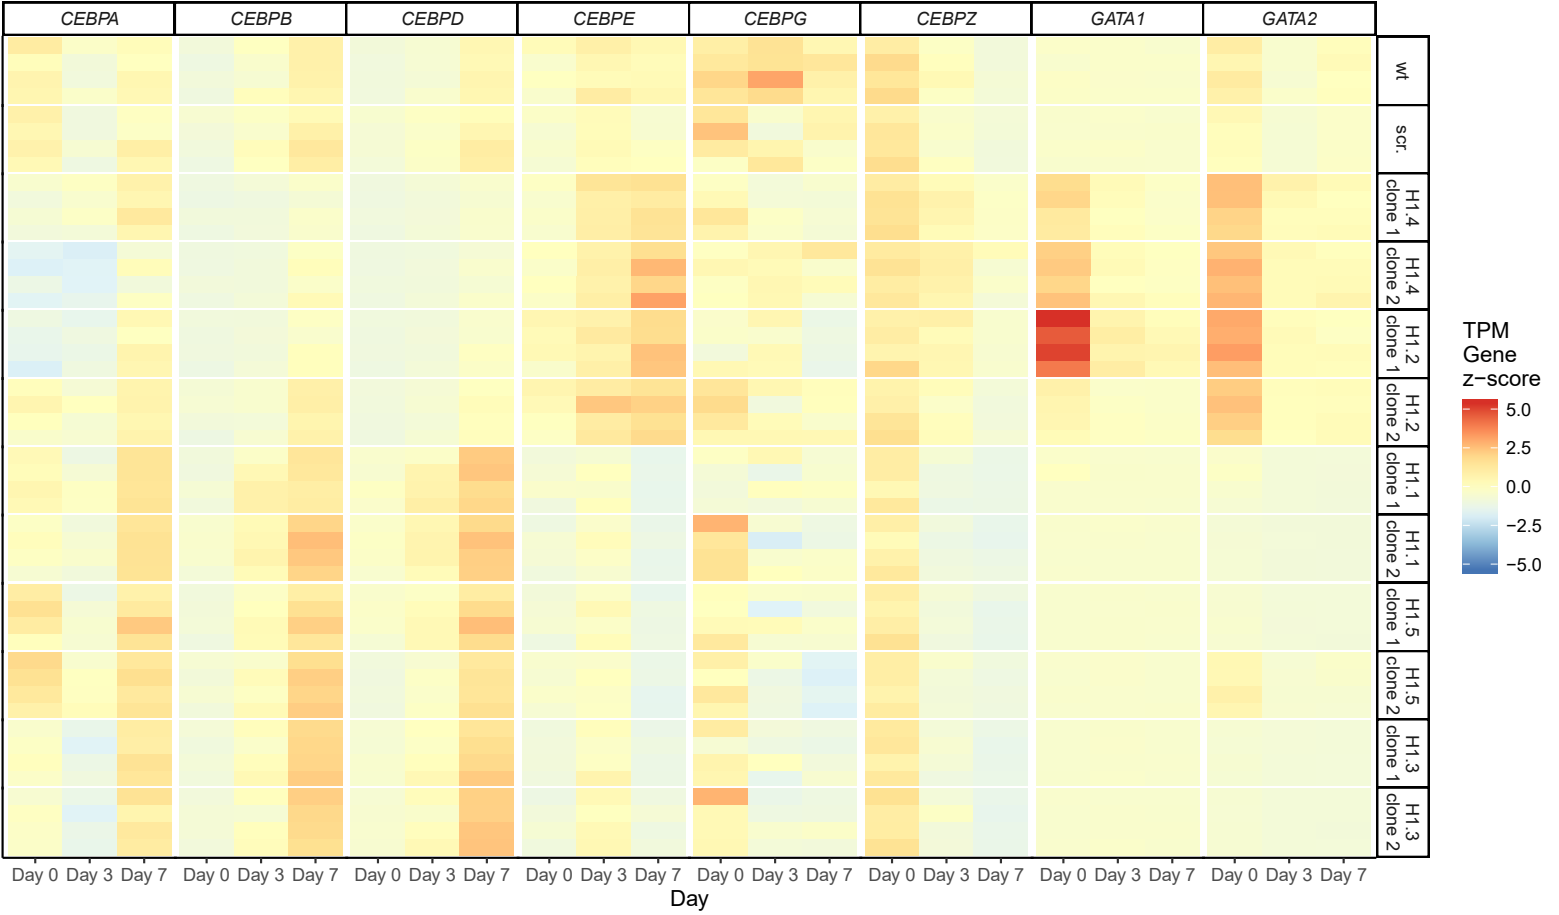

Figure 4 - figure supplement 2

Supplement: supp [file elife_poa_e52563_Figure_4_figure_supplement_2.pdf › elife_poa_e52563_Figure_4_figure_supplement_2.pdf]

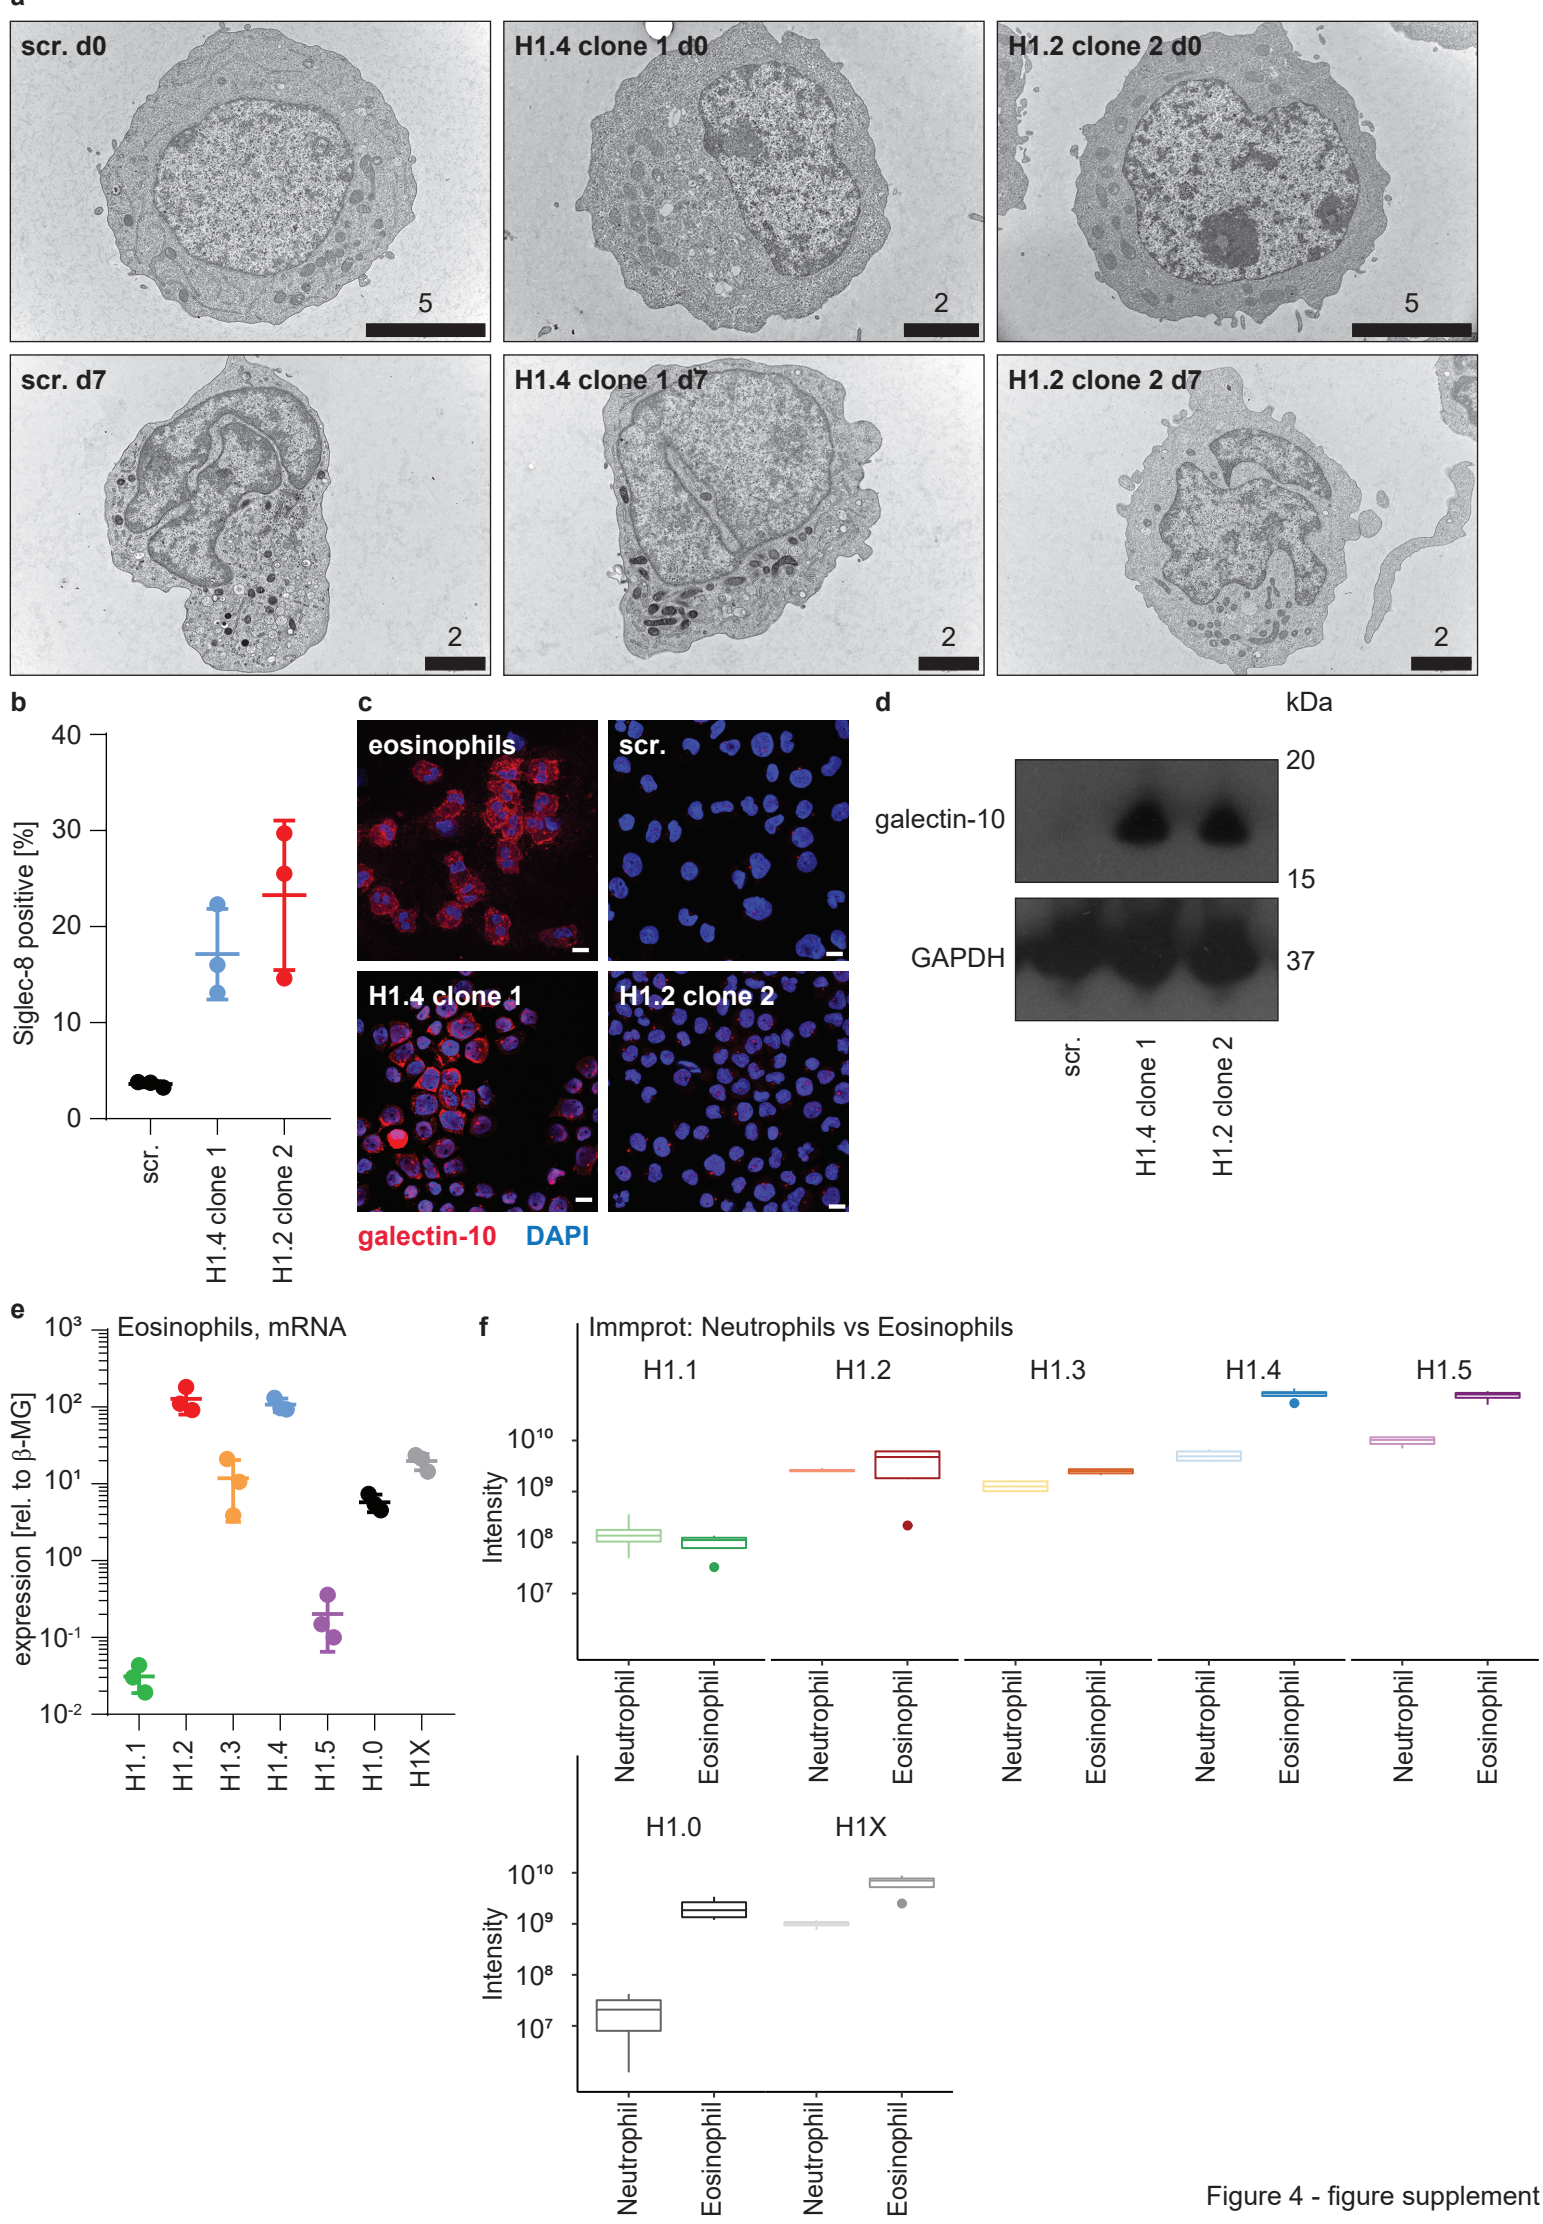

Figure 4 - figure supplement 3

Supplement: supp [file elife_poa_e52563_Figure_4_figure_supplement_3.pdf › elife_poa_e52563_Figure_4_figure_supplement_3.pdf]

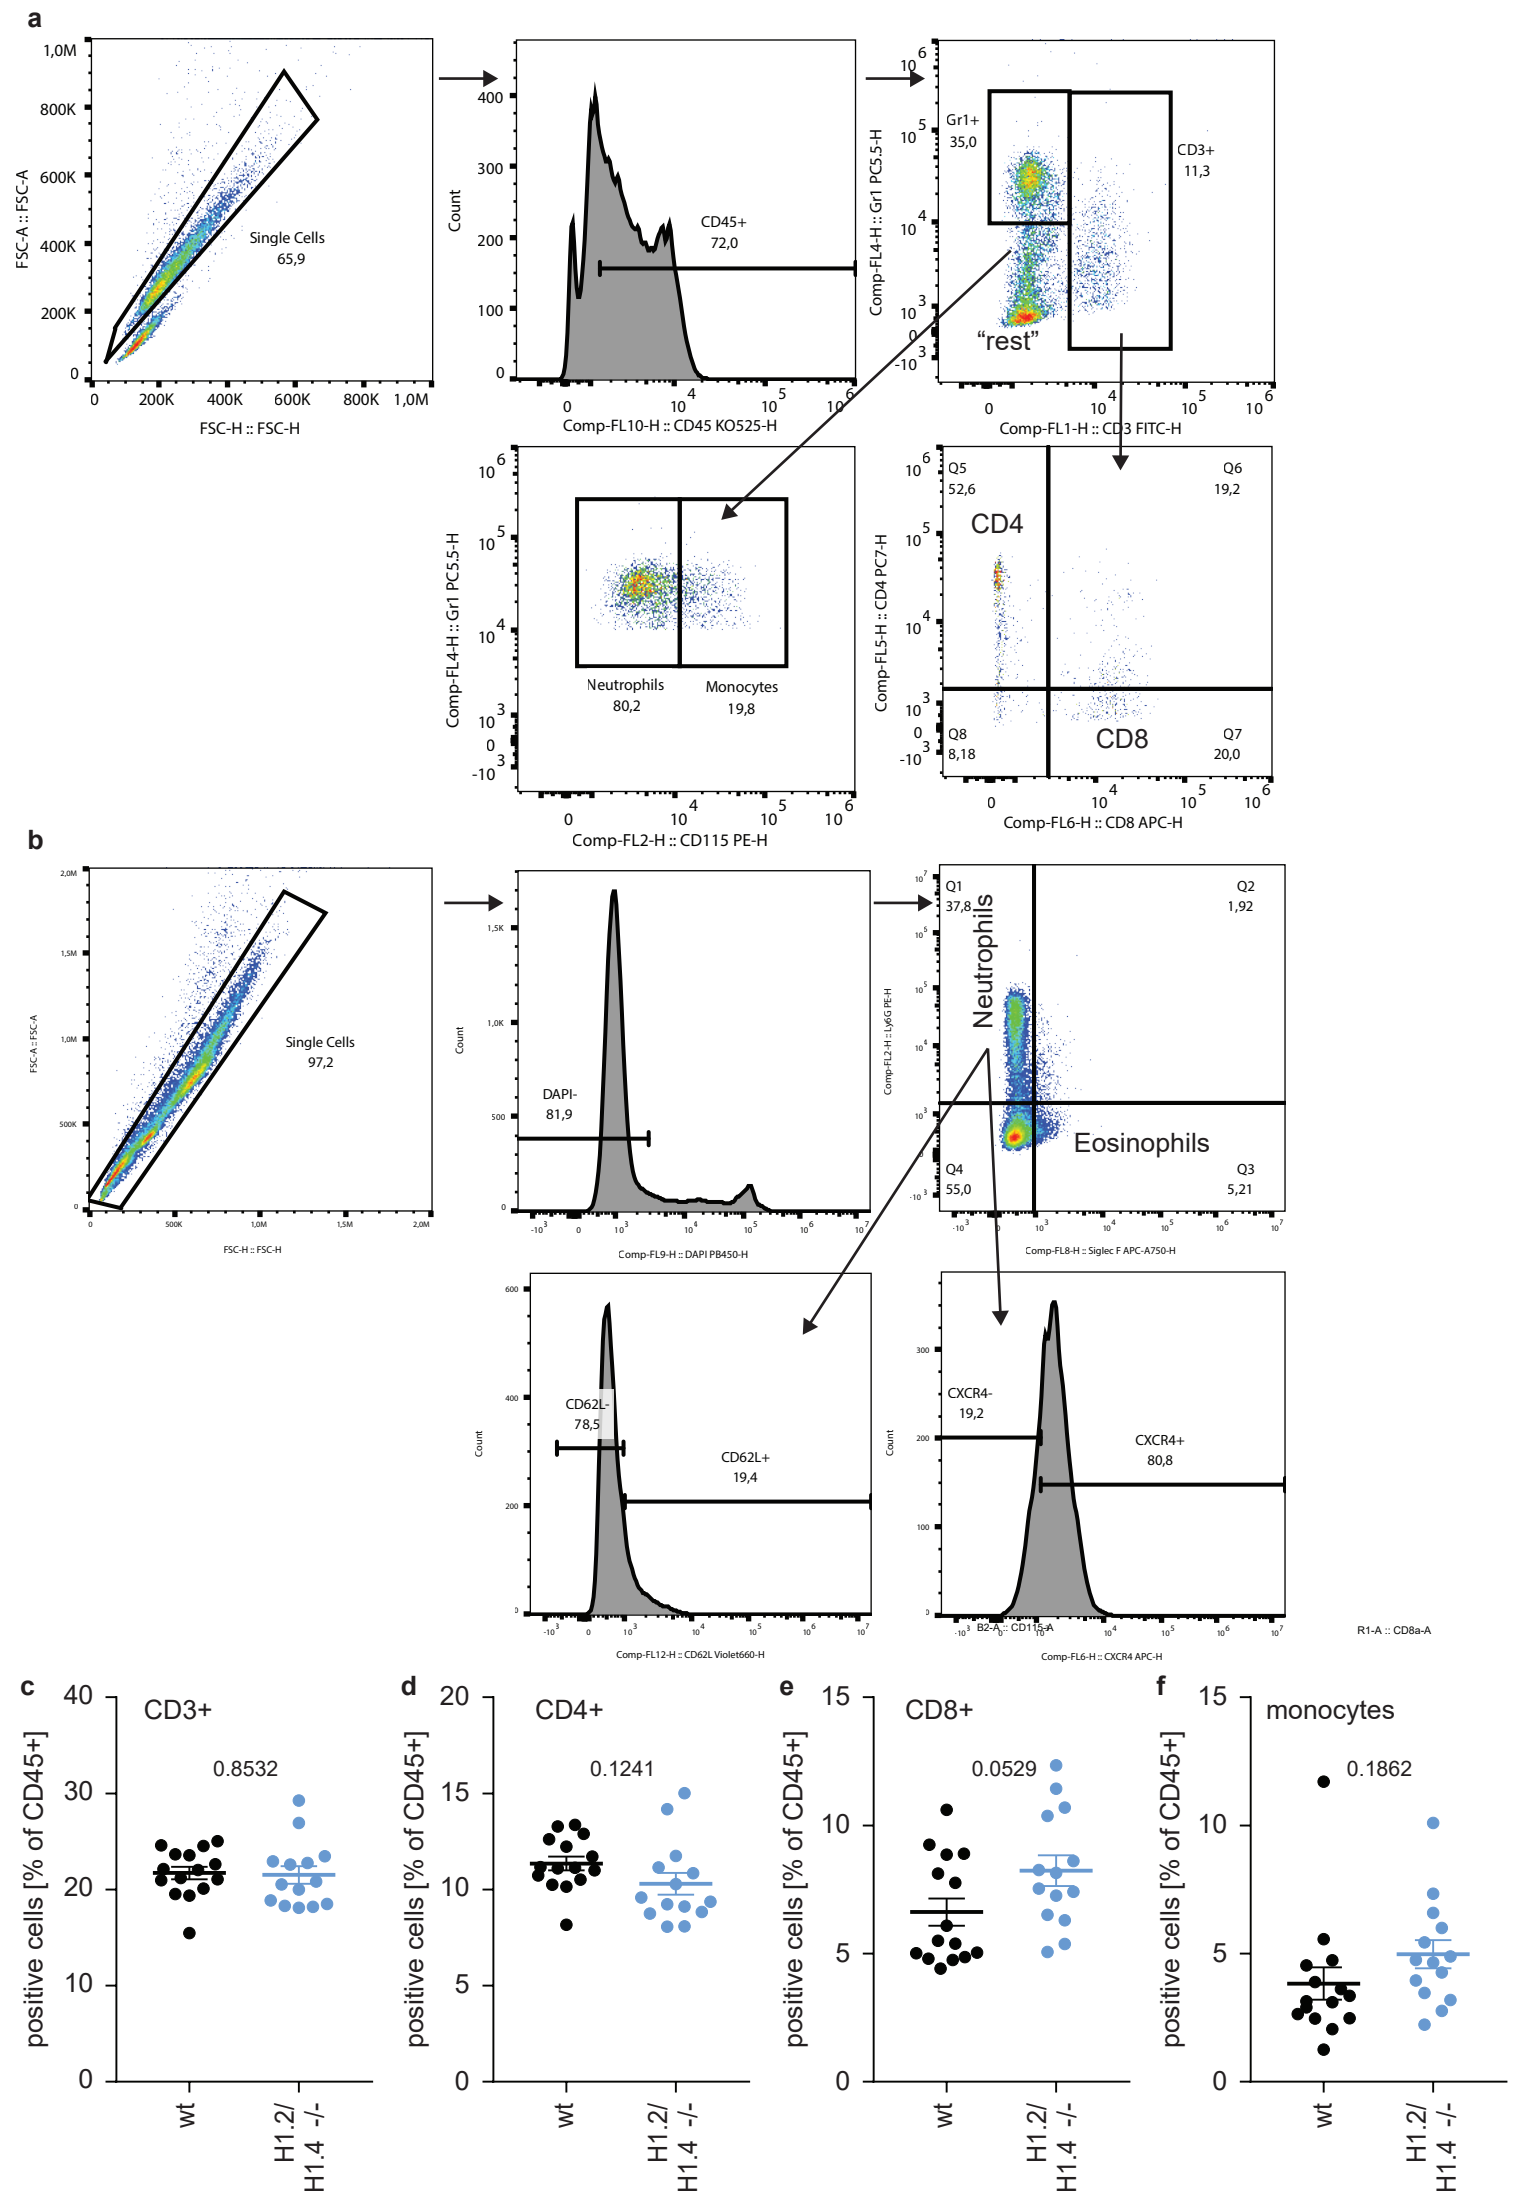

Supplement: supp [file elife_poa_e52563_Figure_5_figure_supplement_1.pdf › elife_poa_e52563_Figure_5_figure_supplement_1.pdf]

# Homeostasis

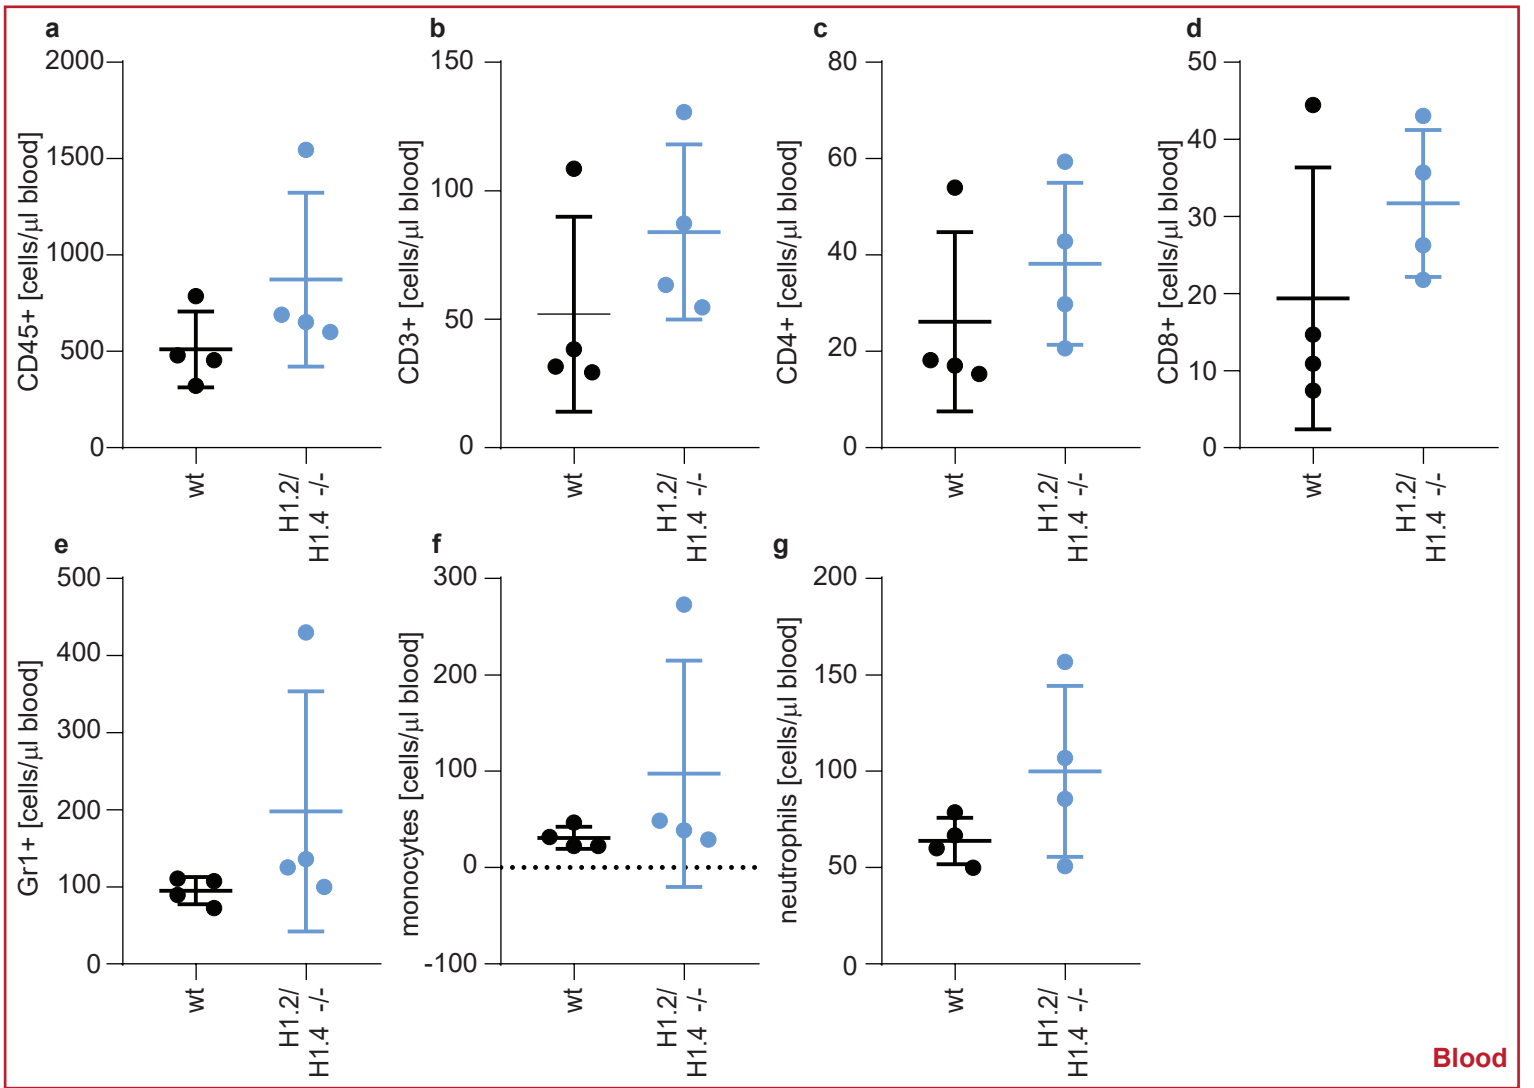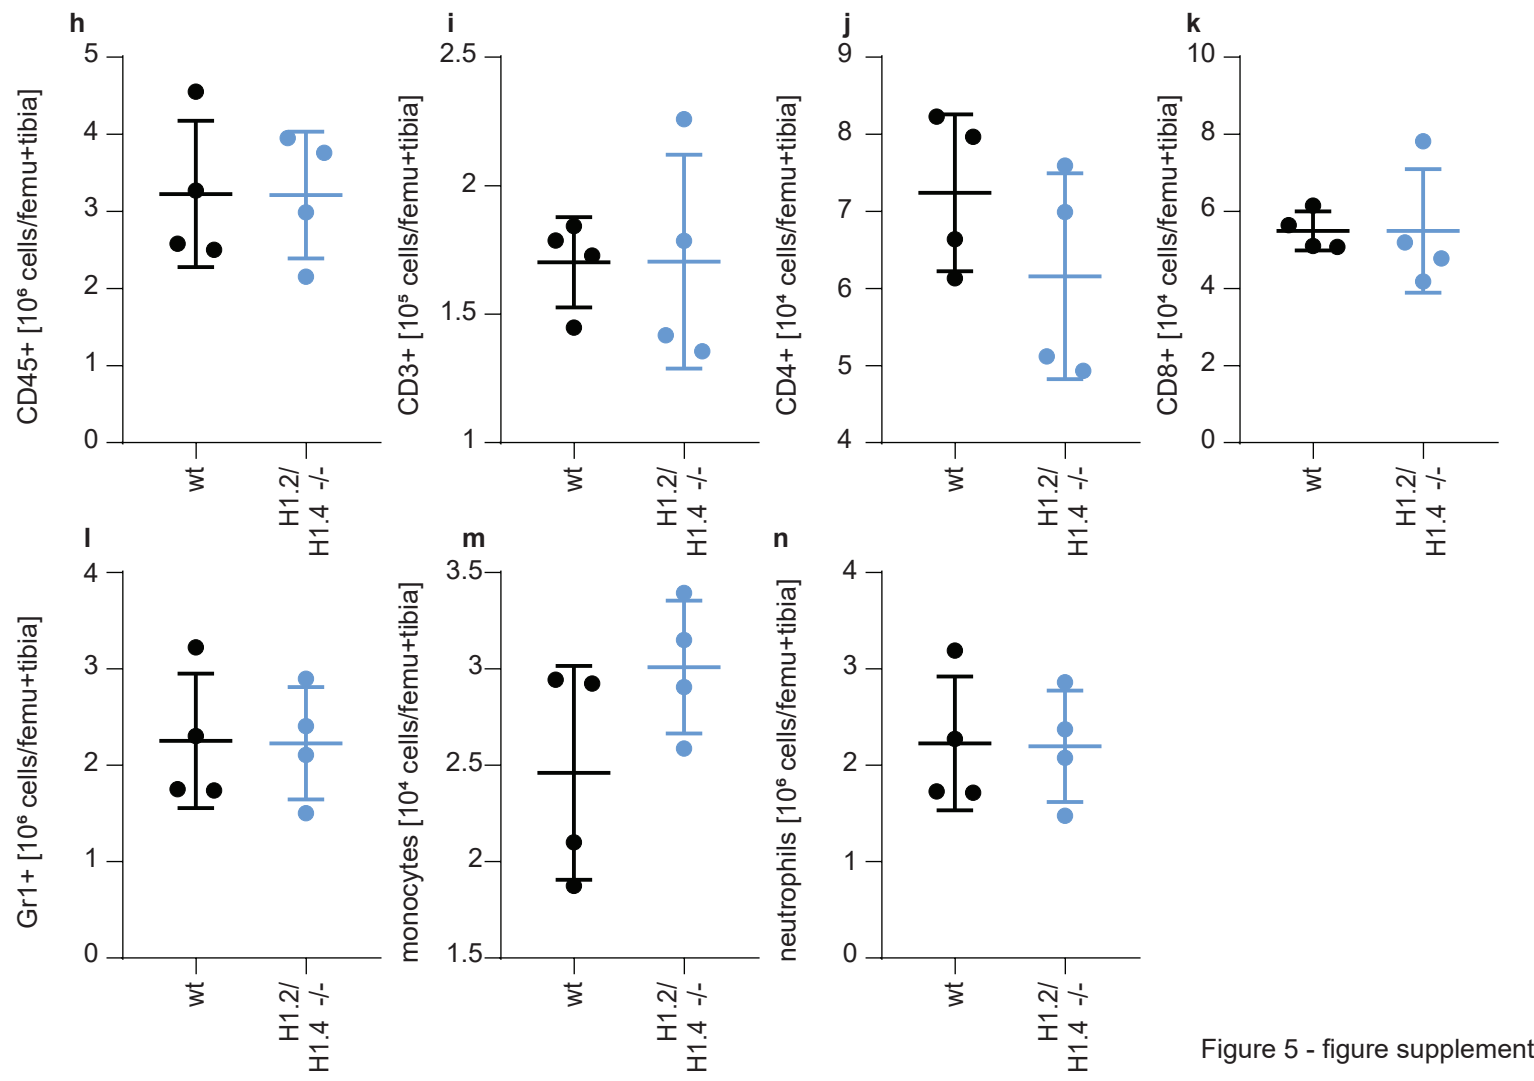

Figure 5 - figure supplement 2

Supplement: supp [file elife_poa_e52563_Figure_5_figure_supplement_2.pdf › elife_poa_e52563_Figure_5_figure_supplement_2.pdf]

# Peritonitis - casein injected

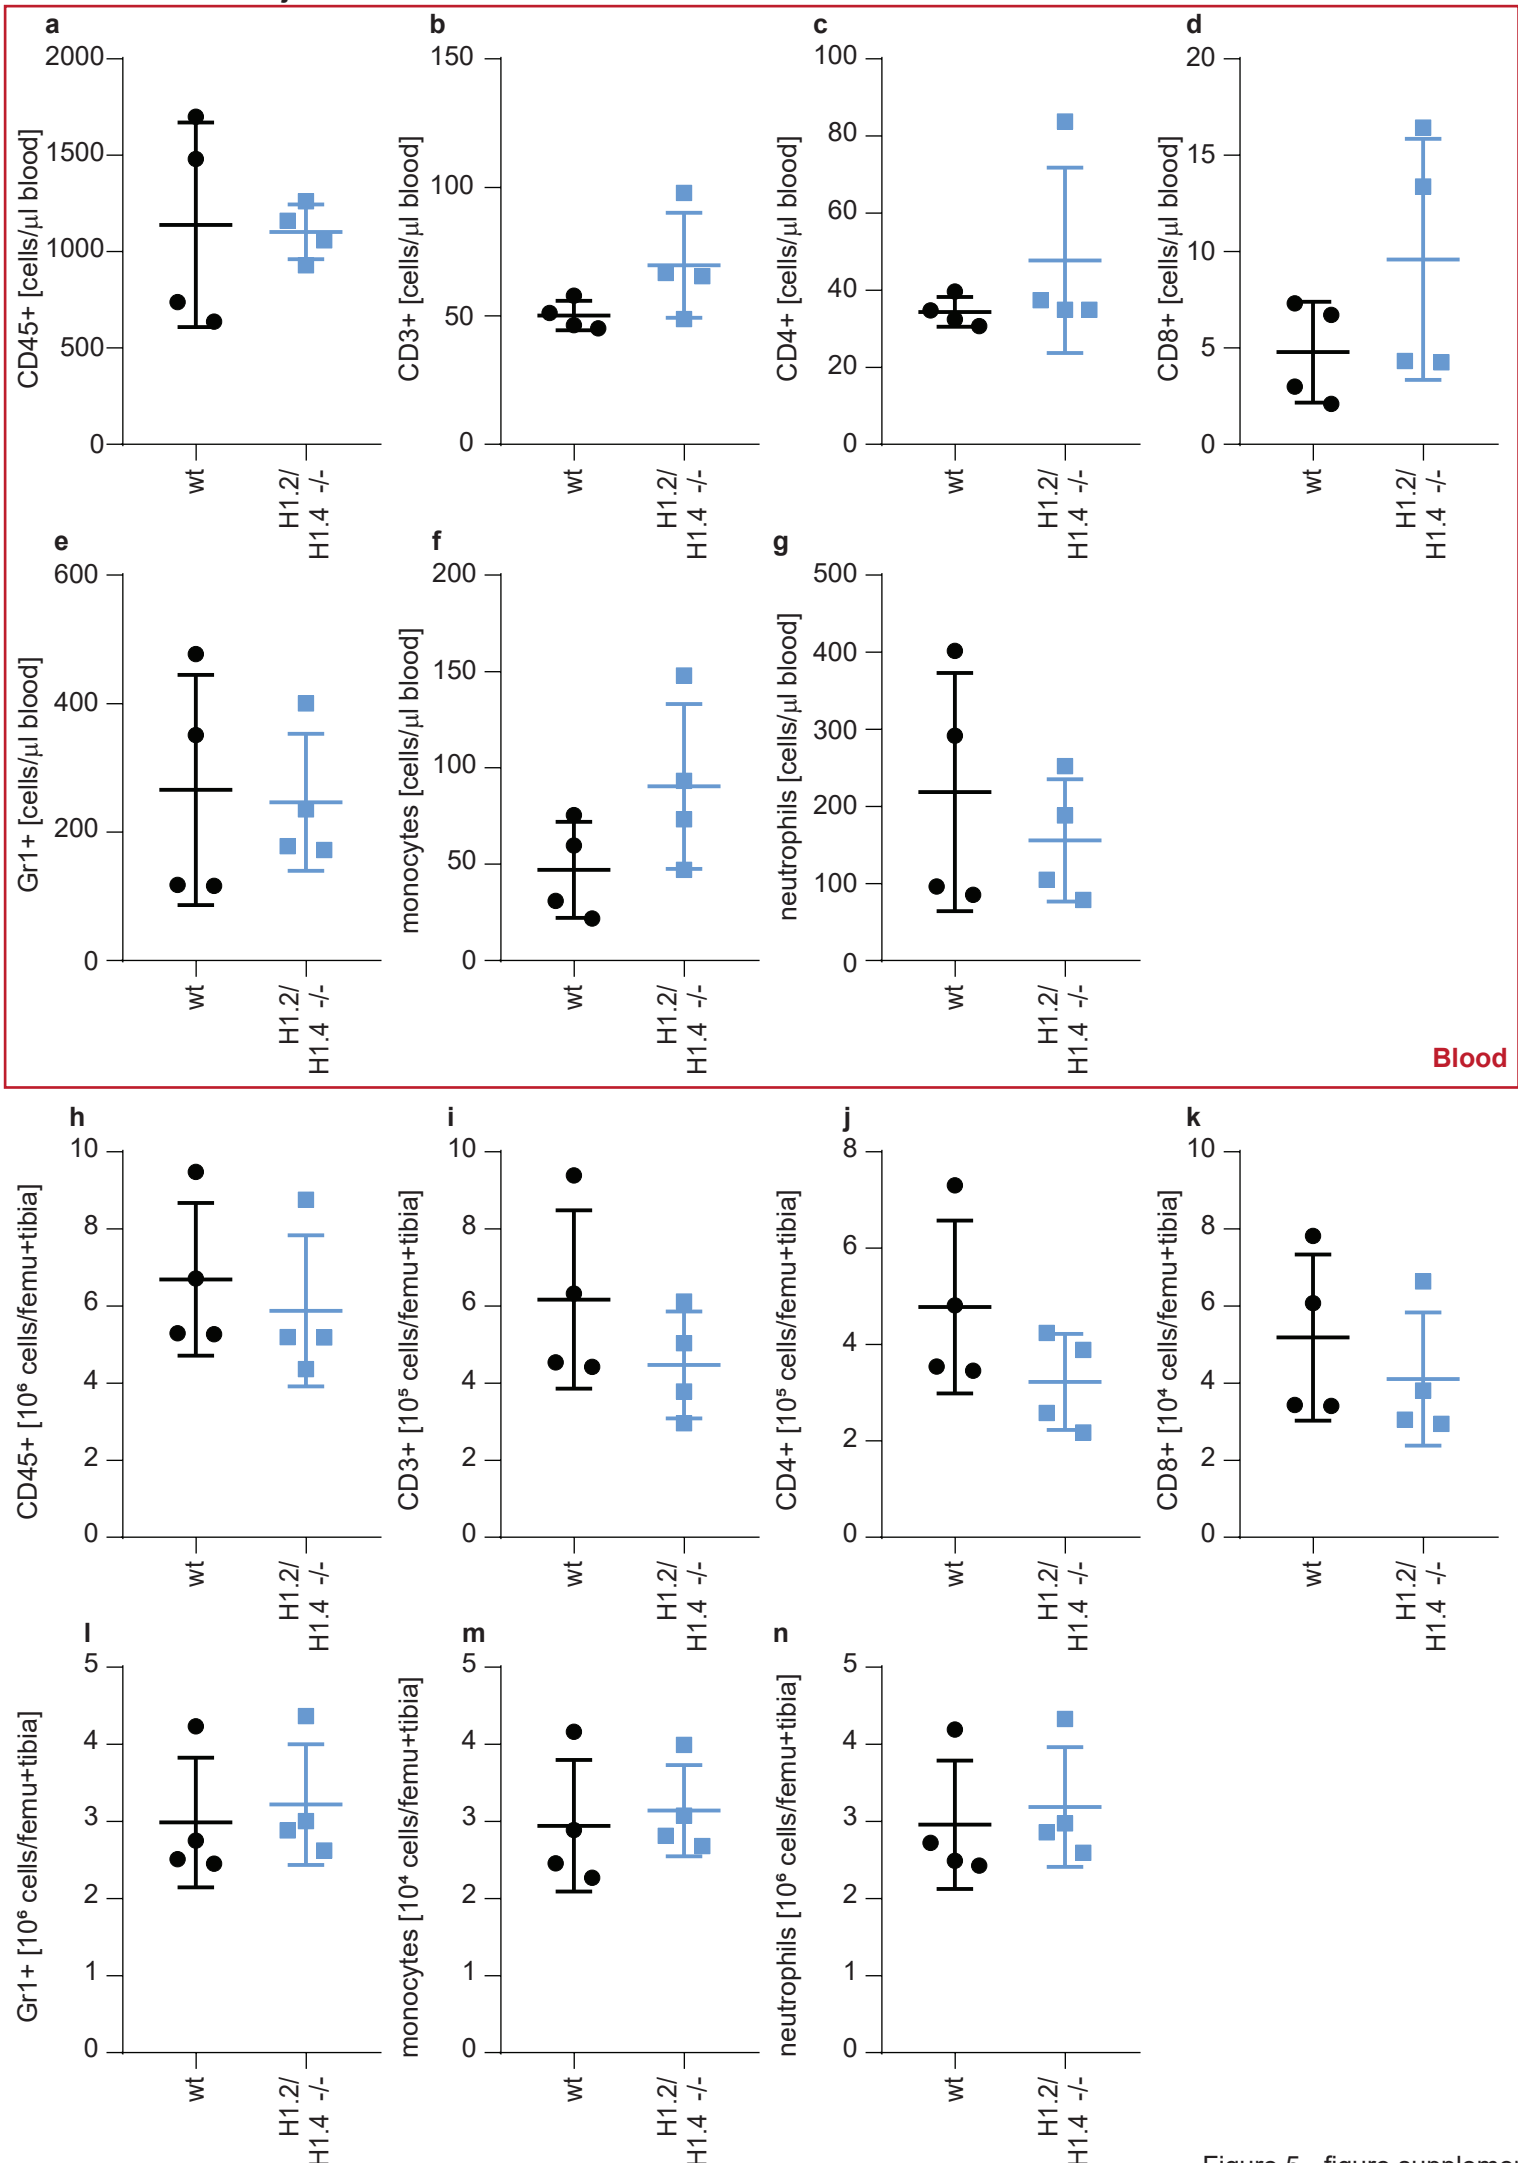

Figure 5 - figure supplement 3

Supplement: supp [file elife_poa_e52563_Figure_5_figure_supplement_3.pdf › elife_poa_e52563_Figure_5_figure_supplement_3.pdf]

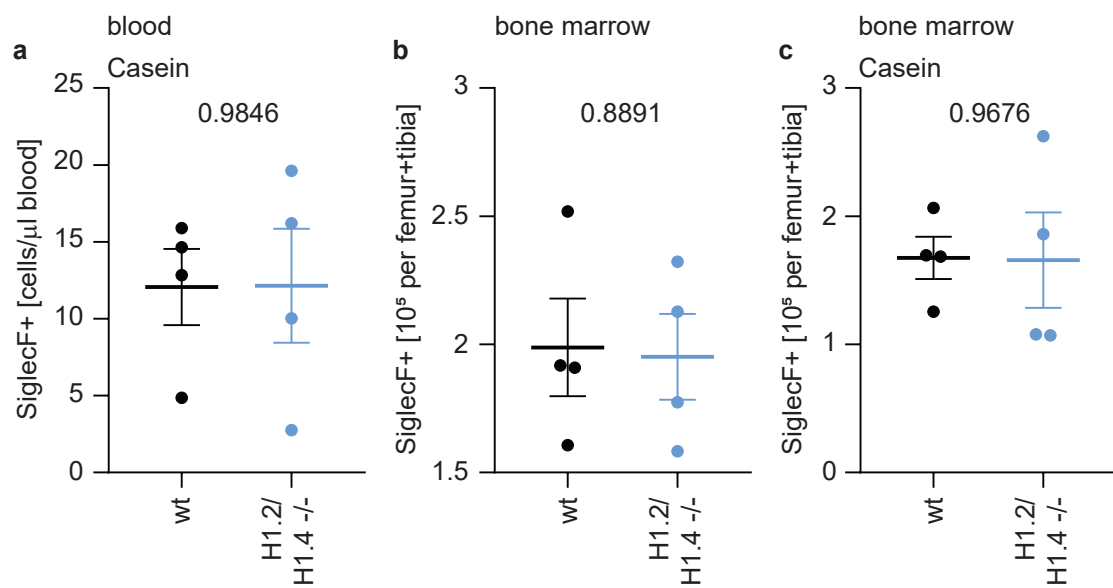

Figure 5 - figure supplement 4

Supplement: supp [file elife_poa_e52563_Figure_5_figure_supplement_4.pdf › elife_poa_e52563_Figure_5_figure_supplement_4.pdf]

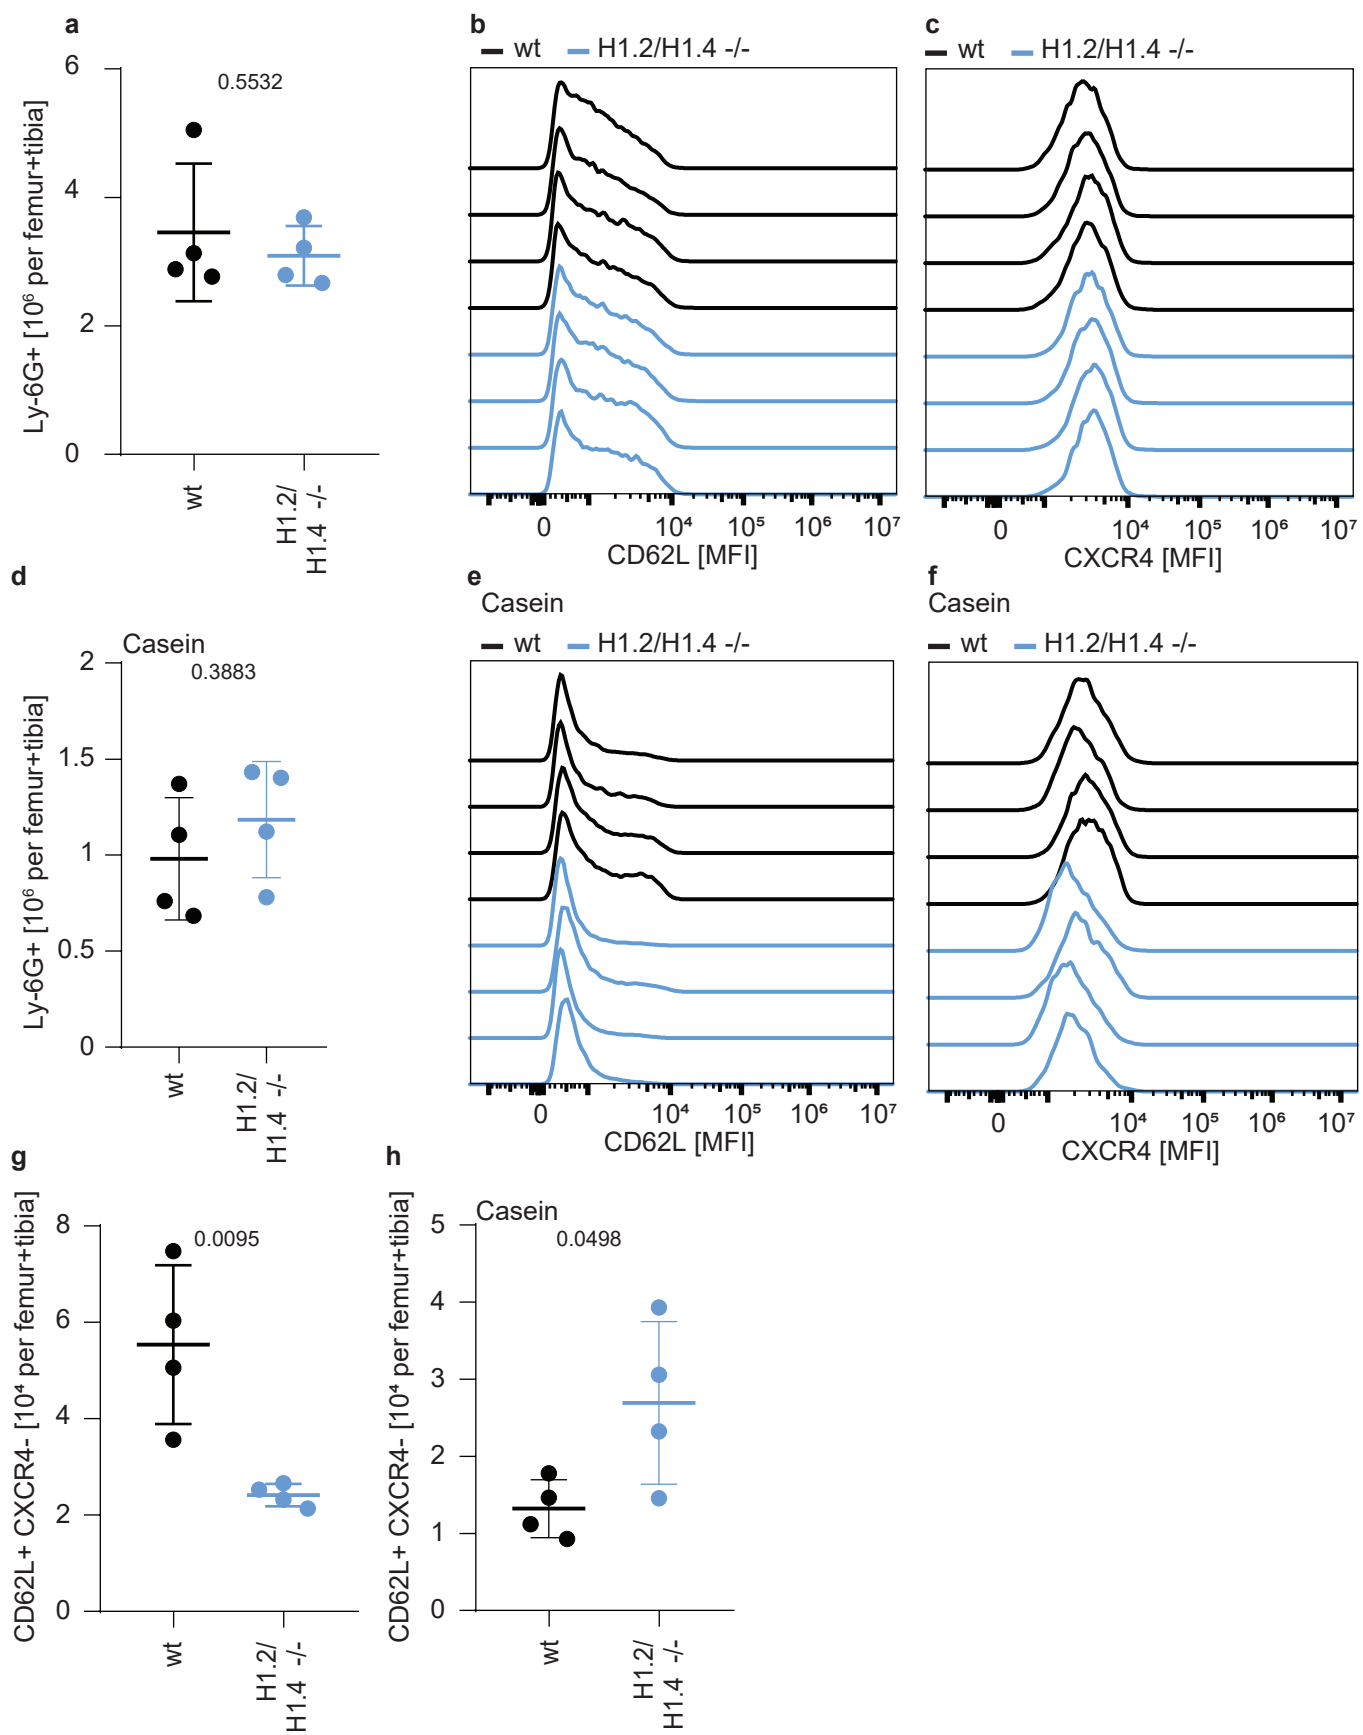

Figure 5 - figure supplement 5

Supplement: supp [file elife_poa_e52563_Figure_5_figure_supplement_5.pdf › elife_poa_e52563_Figure_5_figure_supplement_5.pdf]

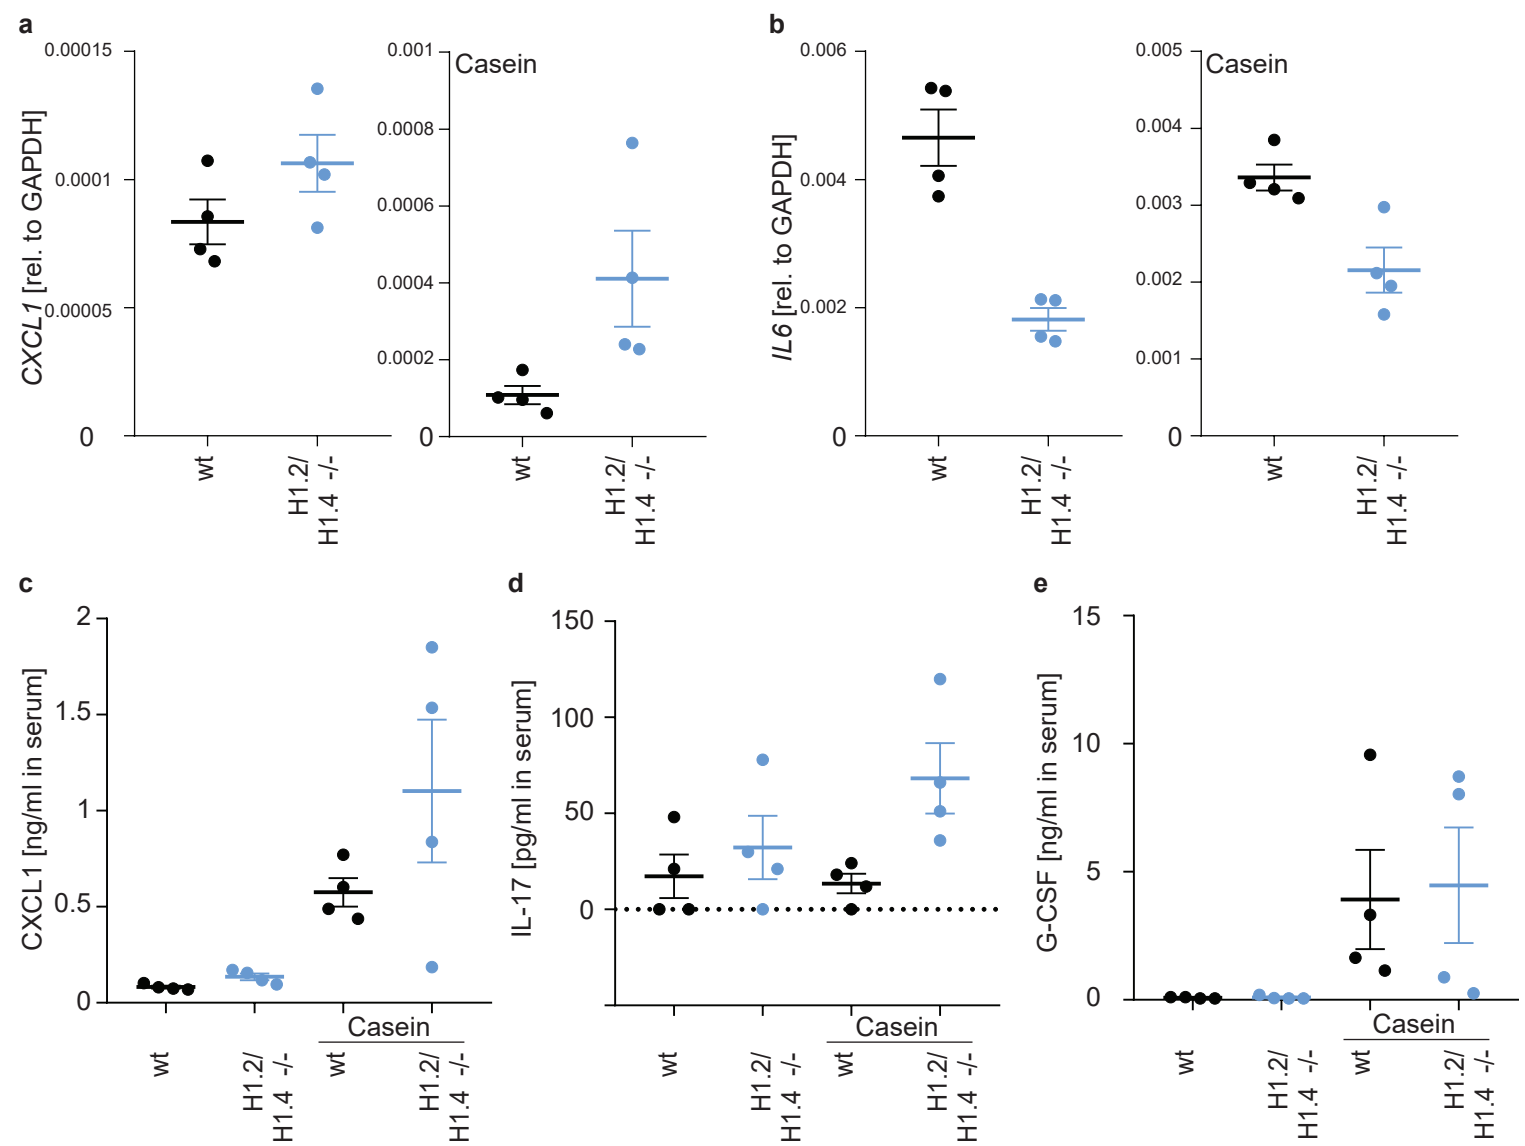

Figure 5 - figure supplement 6

Supplement: supp [file elife_poa_e52563_Figure_5_figure_supplement_6.pdf › elife_poa_e52563_Figure_5_figure_supplement_6.pdf]

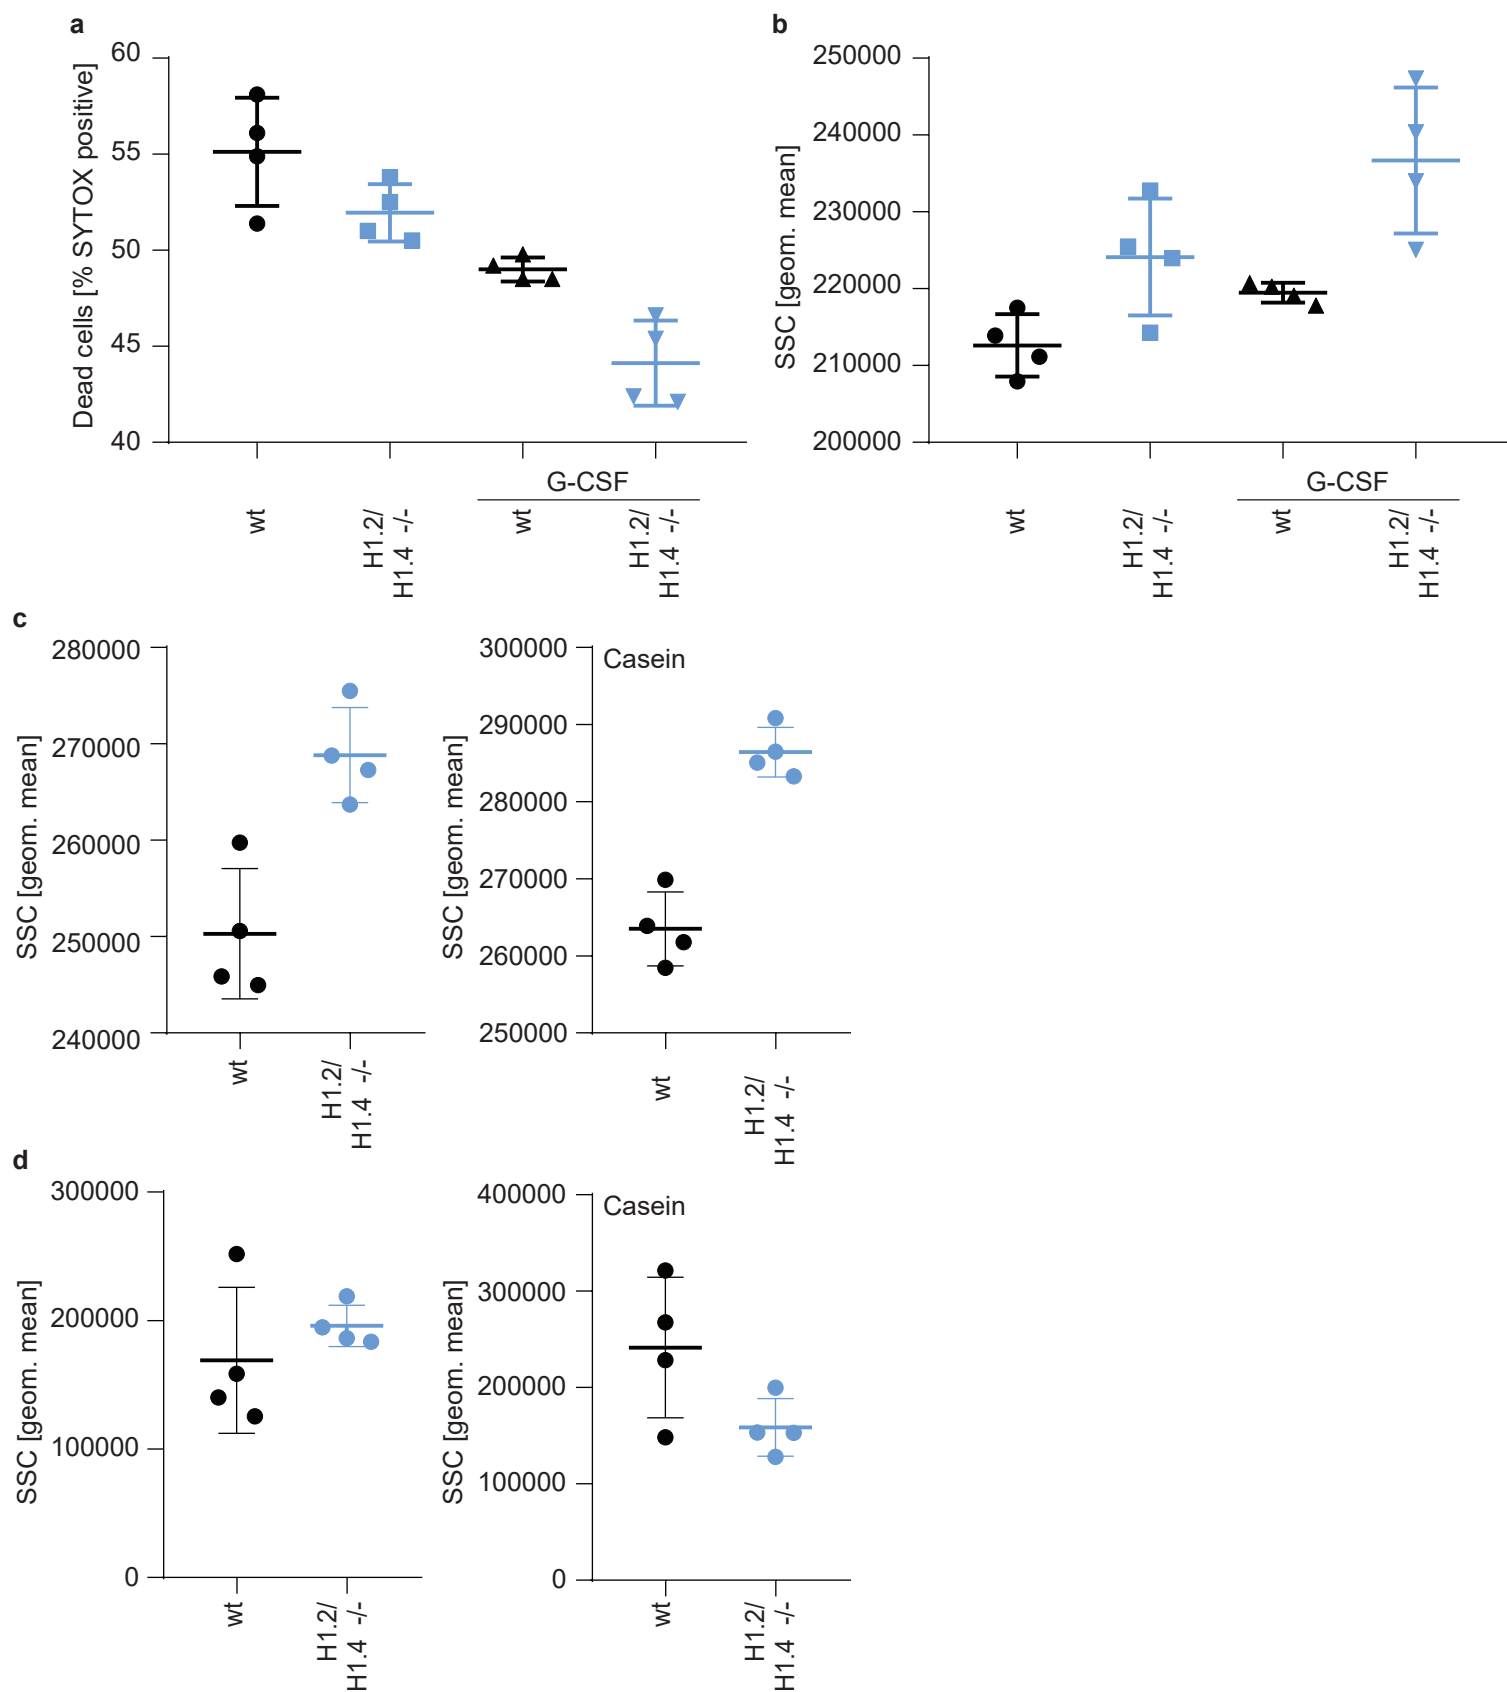

Figure 5 - figure supplement 7

Supplement: supp [file elife_poa_e52563_Figure_5_figure_supplement_7.pdf › elife_poa_e52563_Figure_5_figure_supplement_7.pdf]

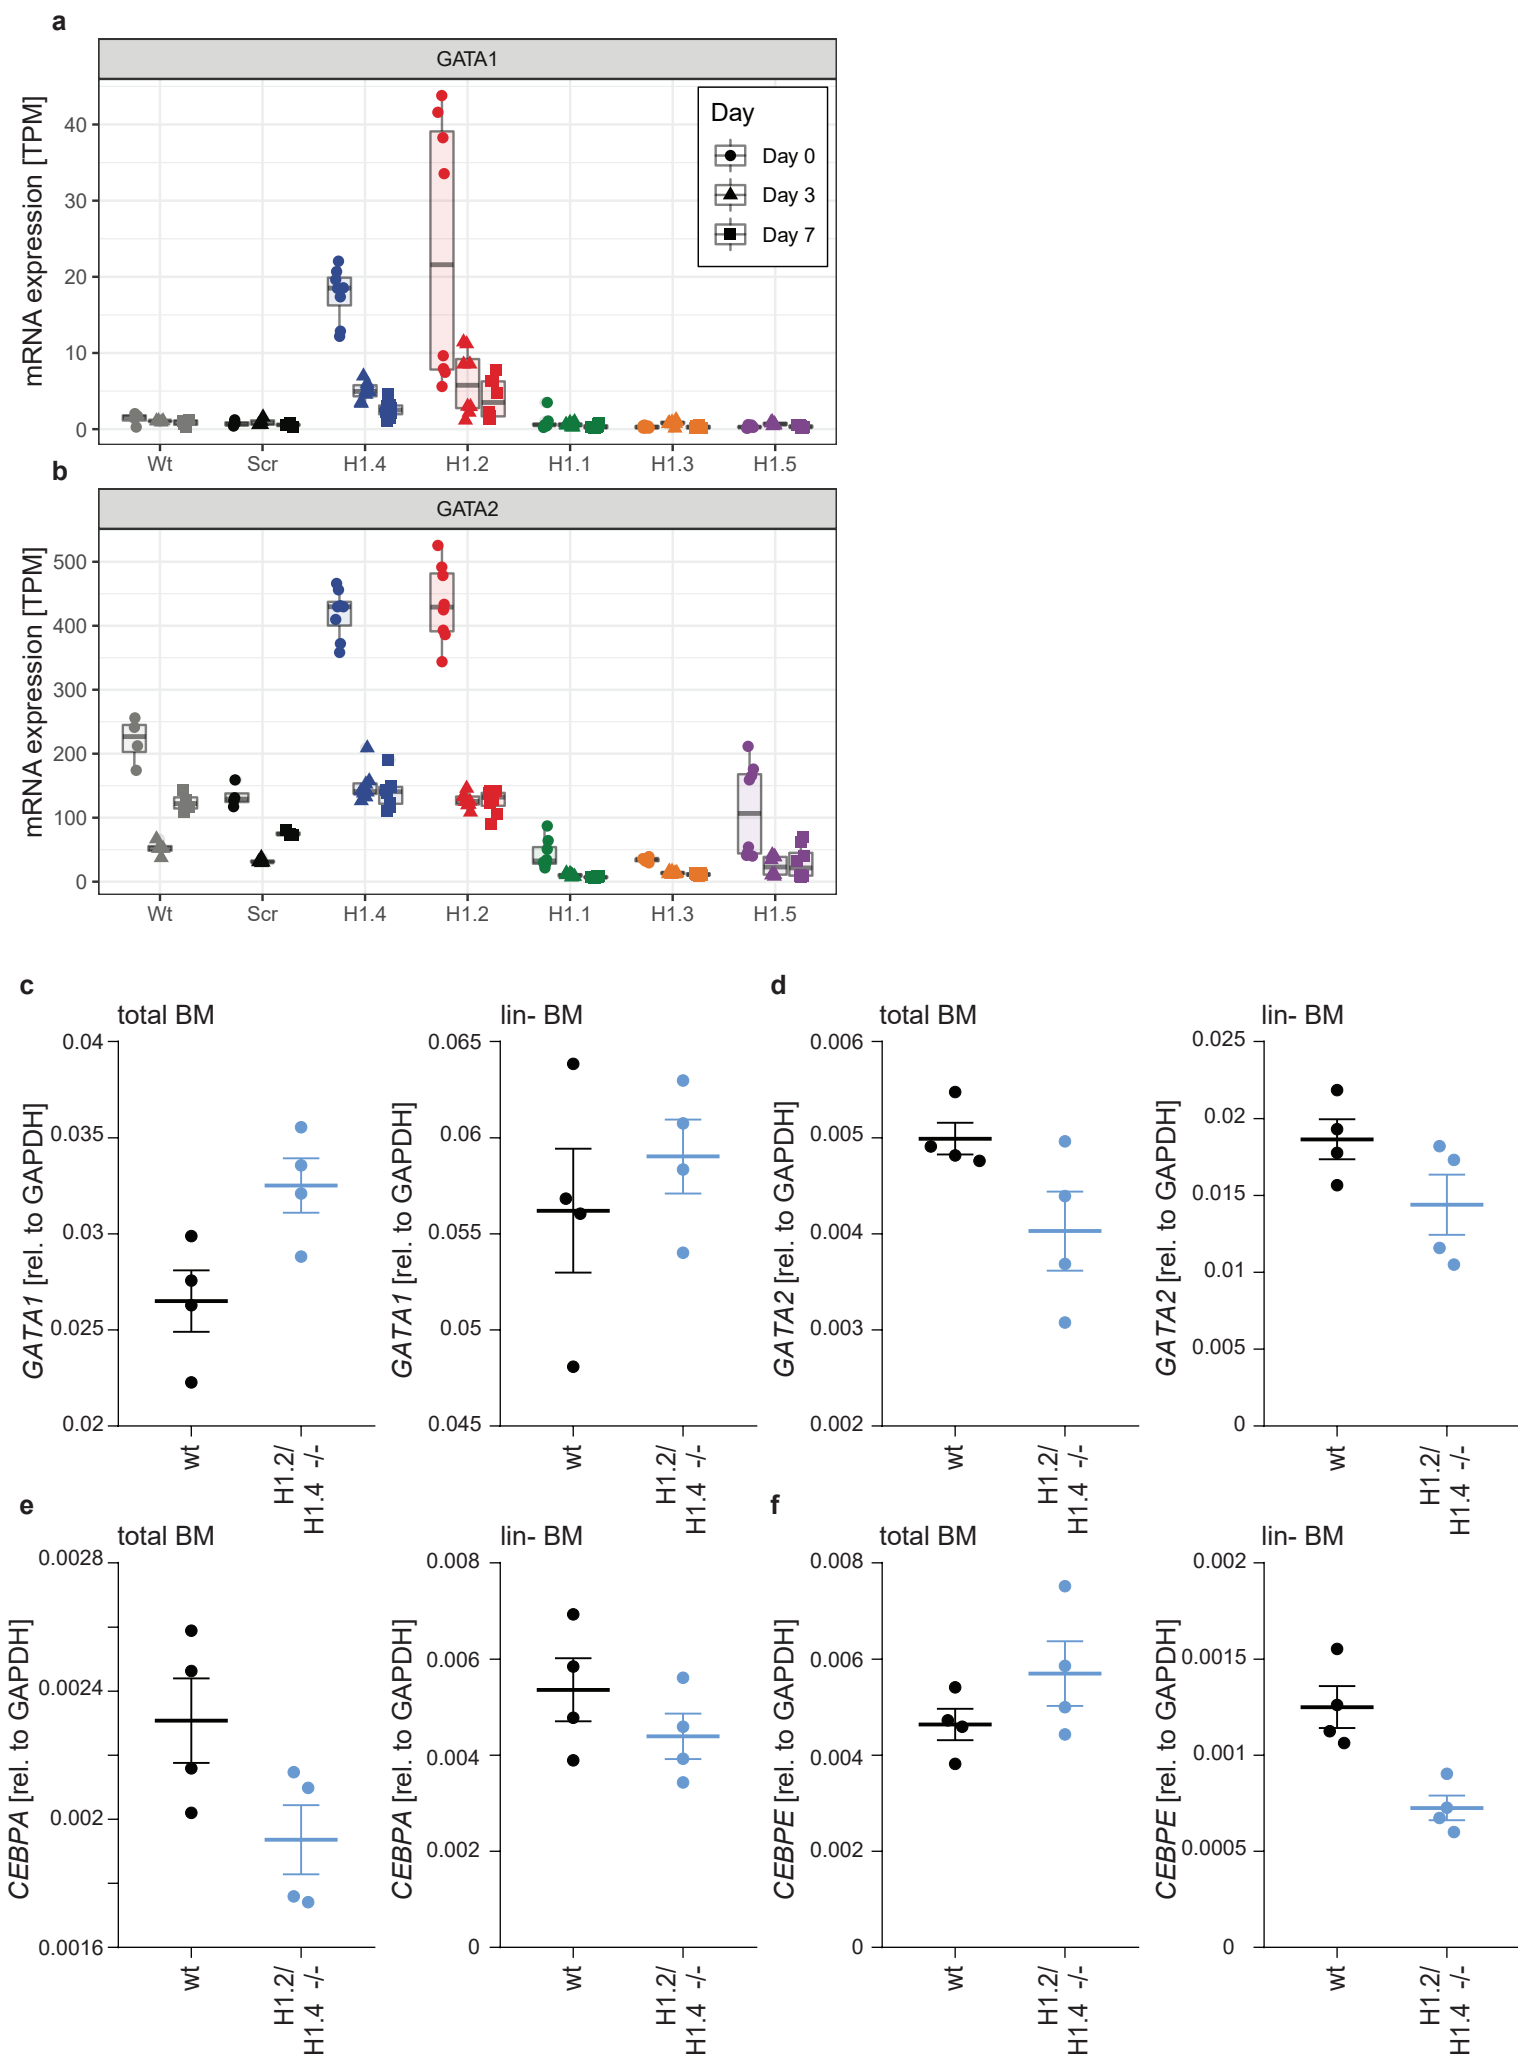

Figure 6 - figure supplement 1

Supplement: supp [file elife_poa_e52563_Figure_6_figure_supplement_1.pdf › elife_poa_e52563_Figure_6_figure_supplement_1.pdf]

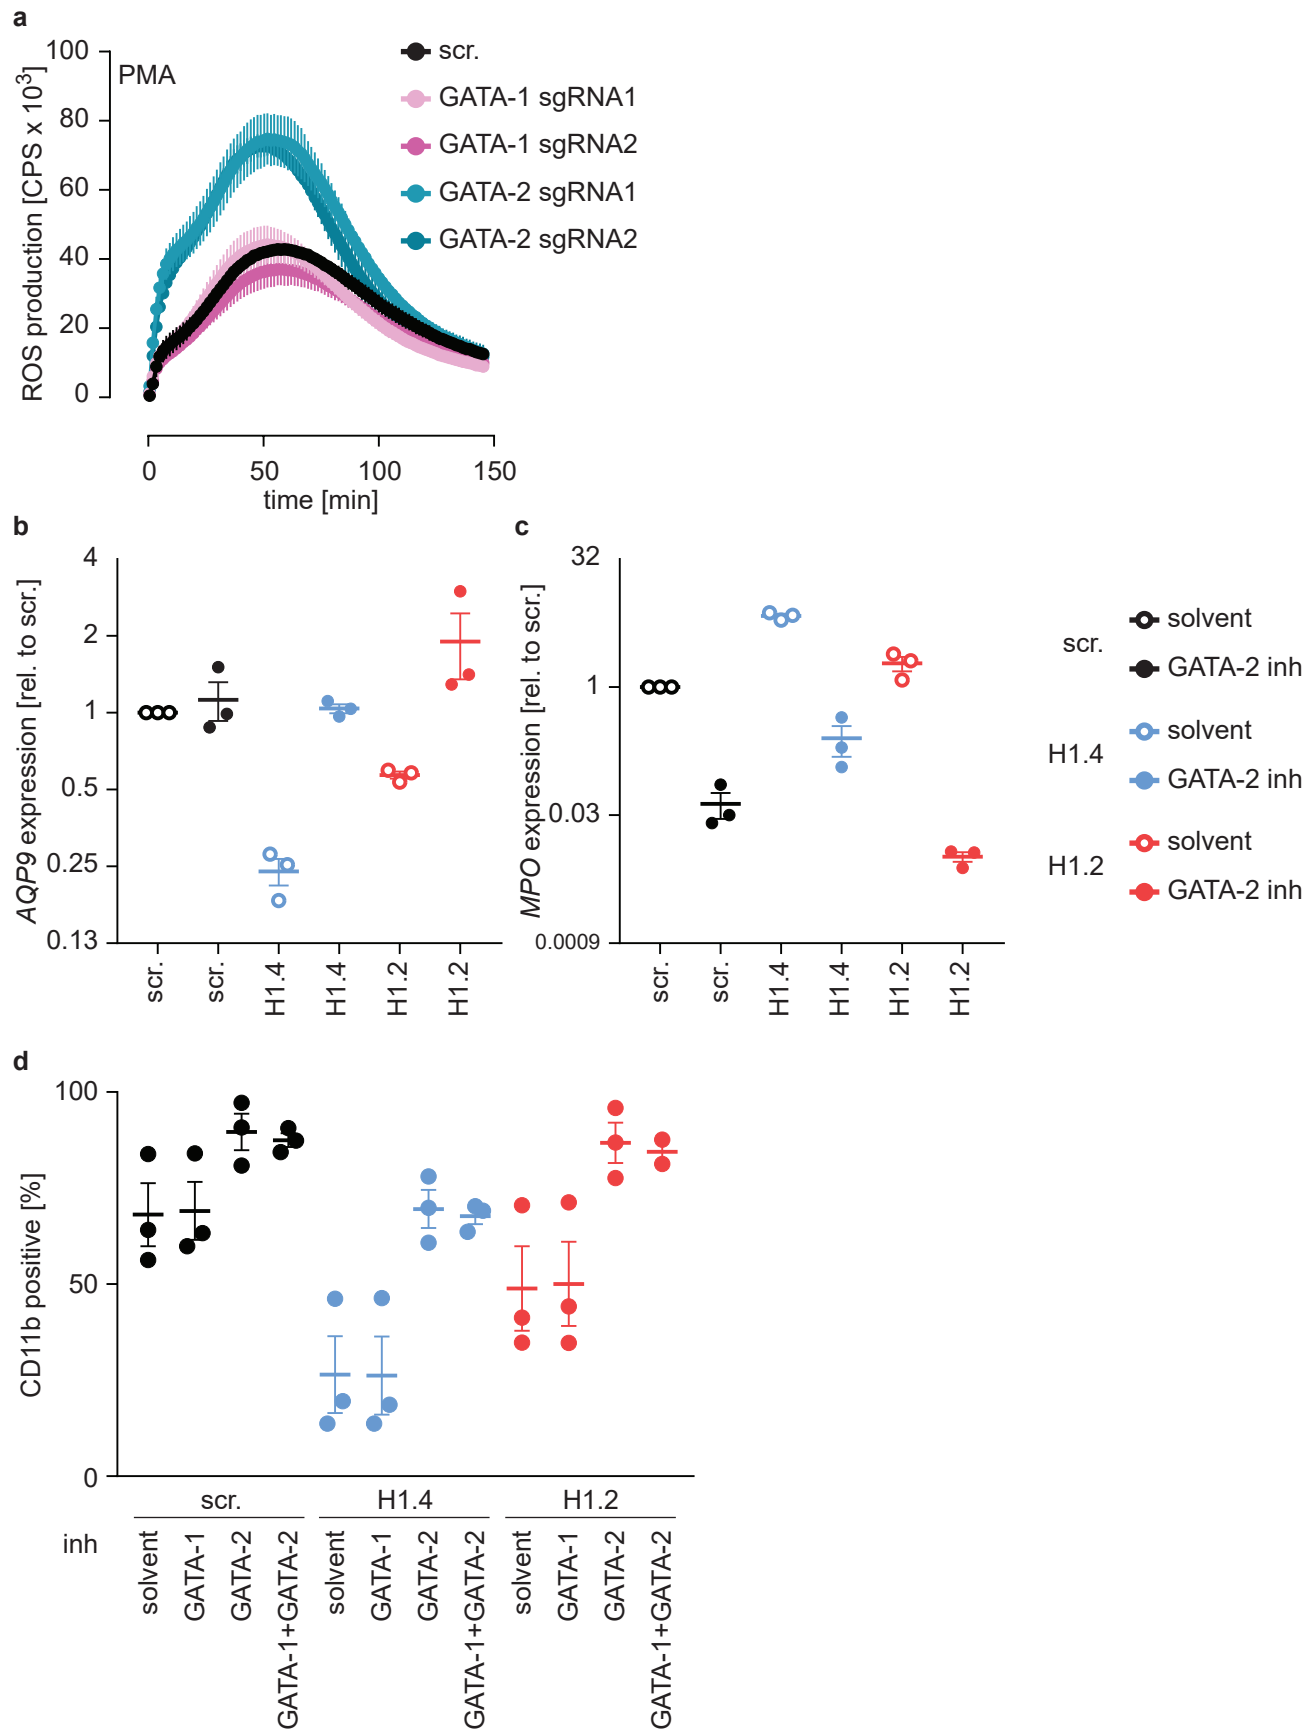

Figure 6 - figure supplement 2

Supplement: supp [file elife_poa_e52563_Figure_6_figure_supplement_2.pdf › elife_poa_e52563_Figure_6_figure_supplement_2.pdf]
